# Supplementary material for: Improved evidence-based genome-scale metabolic models for maize leaf, embryo, and endosperm
Source: Front Plant Sci. 2015 Mar 10;6:142. doi: 10.3389/fpls.2015.00142 (PMC4354304; doi:10.3389/fpls.2015.00142)
Supplement: Supplementary file 2 [file DataSheet2.XLSX]

## Sheet: Full Arabidopsis Model
ModelSEED ID	Reaction Defintion	AraCyc	AraGEM	iRS1597	Mintz-Oron et al.
rxn00001_c0	(1) Diphosphate[c0] + (1) H2O[c0] <=> (1) H+[c0] + (2) Orthophosphate[c0]	INORGPYROPHOSPHAT-RXN.c	R_R00004_c	R00004_c
rxn00001_w0	(1) Diphosphate[w0] + (1) H2O[w0] <=> (1) H+[w0] + (2) Orthophosphate[w0]	INORGPYROPHOSPHAT-RXN.c	R_R00004_c	R00004_c
rxn00002_c0	(3) H+[c0] + (1) H2O[c0] + (1) Urea-1-carboxylate[c0] => (2) CO2[c0] + (2) NH3[c0]	ALLOPHANATE-HYDROLASE-RXN.c
rxn00003_c0	(1) 2-Acetolactate[c0] + (1) CO2[c0] <= (1) H+[c0] + (2) Pyruvate[c0]		R_R00006_c	R00006_c
rxn00006_c0	(2) Hydrogen peroxide[c0] => (2) H2O[c0] + (1) Oxygen[c0]	CATAL-RXN.c
rxn00009_c0	(2) GTP[c0] => (1) Diphosphate[c0] + (1) H+[c0] + (1) P1,P4-Bis(5'-guanosyl) tetraphosphate[c0]
rxn00011_c0	(1) H+[c0] + (1) Pyruvate[c0] + (1) Thiamin diphosphate[c0] => (1) 2-(alpha-Hydroxyethyl)thiamine diphosphate[c0] + (1) CO2[c0]	RXN-12583.c	R_R00014_c	R00014_c
rxn00018_c0	(1) CO2[c0] + (1) D-Ribulose 1,5-bisphosphate[c0] + (1) H2O[c0] <= (2) 3-Phospho-D-glycerate[c0] + (2) H+[c0]
rxn00018_x0	(1) CO2[x0] + (1) D-Ribulose 1,5-bisphosphate[x0] + (1) H2O[x0] <= (2) 3-Phospho-D-glycerate[x0] + (2) H+[x0]
rxn00024_c0	(2) L-Tyrosine[c0] + (1) Oxygen[c0] <= (2) 3,4-Dihydroxy-L-phenylalanine[c0]
rxn00025_c0	(1) Oxygen[c0] + (1) beta-Carotene[c0] => (2) Retinal[c0]	1.14.99.36-RXN.c|BETA-CAROTENE-1515-DIOXYGENASE-RXN.c
rxn00028_c0	(2) Ascorbate[c0] + (1) Oxygen[c0] => (2) Dehydroascorbate[c0] + (2) H2O[c0]		R_R00068_c	R00068_c
rxn00029_c0	(2) 5-Aminolevulinate[c0] => (1) H+[c0] + (2) H2O[c0] + (1) Porphobilinogen[c0]	PORPHOBILSYNTH-RXN.c	R_R00036_c	R00036_c
rxn00048_c0	(2) 6,7-Dimethyl-8-(D-ribityl)lumazine[c0] + (1) H+[c0] => (1) 5-Amino-6-(1-D-ribitylamino)uracil[c0] + (1) Riboflavin[c0]	RIBOFLAVIN-SYN-RXN.c	R_R00066_c	R00066_c
rxn00055_c0	(3) S-Adenosyl-L-methionine[c0] => (3) 5'-Methylthioadenosine[c0] + (3) H+[c0] + (1) Nicotianamine[c0]	2.5.1.43-RXN.c		R00075_c
rxn00056_c0	(4) Fe2+[c0] + (4) H+[c0] + (1) Oxygen[c0] <=> (4) Fe3+[c0] + (2) H2O[c0]	RXN0-1483.c
rxn00056_m0	(4) Fe2+[m0] + (4) H+[m0] + (1) Oxygen[m0] <=> (4) Fe3+[m0] + (2) H2O[m0]	RXN0-1483.c
rxn00060_c0	(1) H2O[c0] + (4) Porphobilinogen[c0] => (1) Hydroxymethylbilane[c0] + (4) NH3[c0]	OHMETHYLBILANESYN-RXN.c	R_R00084_c	R00084_c
rxn00061_c0	(1) ATP[c0] + (2) H2O[c0] => (1) AMP[c0] + (3) H+[c0] + (2) Orthophosphate[c0]	APYRASE-RXN.c
rxn00062_c0	(1) ATP[c0] + (1) H2O[c0] => (1) ADP[c0] + (1) H+[c0] + (1) Orthophosphate[c0]	3.6.4.3-RXN.c|3.6.4.4-RXN.c|3.6.4.5-RXN.c|3.6.4.6-RXN.c|ADENOSINETRIPHOSPHATASE-RXN.c|NUCLEOSIDE-TRIPHOSPHATASE-RXN.c.araexp.ADP_ATP|RXN-11109.c|RXN-11135.c|RXN0-1061.c	R_R00086_c|R_R01719_c	R00086_c|R01719_c
rxn00062_g0	(1) ATP[g0] + (1) H2O[g0] => (1) ADP[g0] + (1) H+[g0] + (1) Orthophosphate[g0]	3.6.4.3-RXN.c|3.6.4.4-RXN.c|3.6.4.5-RXN.c|3.6.4.6-RXN.c|ADENOSINETRIPHOSPHATASE-RXN.c|NUCLEOSIDE-TRIPHOSPHATASE-RXN.c.araexp.ADP_ATP|RXN-11109.c|RXN-11135.c|RXN0-1061.c	R_R00086_c|R_R01719_c	R00086_c|R01719_c
rxn00063_c0	(1) ATP[c0] + (1) H2O[c0] => (1) AMP[c0] + (1) Diphosphate[c0] + (2) H+[c0]	3.6.1.19-RXN.c.araexp.AMP_ATP
rxn00065_c0	(1) ATP[c0] => (1) 3',5'-Cyclic AMP[c0] + (1) Diphosphate[c0] + (1) H+[c0]	ADENYLATECYC-RXN.c	R_R00089_c	R00089_c
rxn00068_c0	(2) Fe2+[c0] + (1) H+[c0] + (1) NAD+[c0] <= (2) Fe3+[c0] + (1) NADH[c0]	FERRIC-CHELATE-REDUCTASE-RXN.c
rxn00068_w0	(2) Fe2+[w0] + (1) H+[w0] + (1) NAD+[w0] <= (2) Fe3+[w0] + (1) NADH[w0]	FERRIC-CHELATE-REDUCTASE-RXN.c
rxn00069_c0	(2) L-Glutamate[c0] + (1) NAD+[c0] <=> (1) 2-Oxoglutarate[c0] + (1) H+[c0] + (1) L-Glutamine[c0] + (1) NADH[c0]	GLUTAMATE-SYNTHASE-NADH-RXN.c
rxn00069_m0	(2) L-Glutamate[m0] + (1) NAD+[m0] <=> (1) 2-Oxoglutarate[m0] + (1) H+[m0] + (1) L-Glutamine[m0] + (1) NADH[m0]	GLUTAMATE-SYNTHASE-NADH-RXN.c
rxn00070_c0	(2) Glutathione[c0] + (1) NAD+[c0] <=> (1) Glutathione disulfide[c0] + (1) H+[c0] + (1) NADH[c0]
rxn00076_c0	(1) H2O[c0] + (1) NAD+[c0] => (1) AMP[c0] + (2) H+[c0] + (1) Nicotinamide D-ribonucleotide[c0]	NADPYROPHOSPHAT-RXN.c	R_R00103_c	R00103_c
rxn00077_c0	(1) ATP[c0] + (1) NAD+[c0] => (1) ADP[c0] + (1) H+[c0] + (1) NADP+[c0]	NAD-KIN-RXN.c
rxn00078_c0	(1) ATP[c0] + (1) NADH[c0] => (1) ADP[c0] + (1) H+[c0] + (1) NADPH[c0]	NADH-KINASE-RXN.c
rxn00078_x0	(1) ATP[x0] + (1) NADH[x0] <=> (1) ADP[x0] + (1) H+[x0] + (1) NADPH[x0]	NADH-KINASE-RXN.c
rxn00083_c0	(1) NAD+[c0] + (1) NADPH[c0] <=> (1) NADH[c0] + (1) NADP+[c0]	PYRNUTRANSHYDROGEN-RXN.c
rxn00084_c0	(1) H+[c0] + (1) Hydrogen peroxide[c0] + (1) NADPH[c0] => (2) H2O[c0] + (1) NADP+[c0]	NADPH-PEROXIDASE-RXN.c
rxn00085_c0	(2) L-Glutamate[c0] + (1) NADP+[c0] <=> (1) 2-Oxoglutarate[c0] + (1) H+[c0] + (1) L-Glutamine[c0] + (1) NADPH[c0]	GLUTAMATESYN-RXN.c	R_R00114_c	R00114_c
rxn00085_m0	(2) L-Glutamate[m0] + (1) NADP+[m0] <=> (1) 2-Oxoglutarate[m0] + (1) H+[m0] + (1) L-Glutamine[m0] + (1) NADPH[m0]	GLUTAMATESYN-RXN.c	R_R00114_c	R00114_c
rxn00086_c0	(2) Glutathione[c0] + (1) NADP+[c0] <=> (1) Glutathione disulfide[c0] + (1) H+[c0] + (1) NADPH[c0]	GLUTATHIONE-REDUCT-NADPH-RXN.c	R_R00115_c	R00115_c
rxn00088_c0	(1) H2O[c0] + (1) NADP+[c0] <=> (1) NAD+[c0] + (1) Orthophosphate[c0]	NADPPHOSPHAT-RXN.c|RXN-5822.c
rxn00092_c0	(1) ADP[c0] + (1) H2O[c0] => (1) AMP[c0] + (2) H+[c0] + (1) Orthophosphate[c0]	NUCLEOSIDE-DIPHOSPHATASE-RXN.c.araexp.ADP_AMP|RXN-10862.c	R_R00122_c	R00122_c
rxn00097_c0	(1) AMP[c0] + (1) ATP[c0] + (1) H+[c0] <=> (2) ADP[c0]	RXN4FS-19.c	R_R00127_c	R00127_c
rxn00097_n0	(1) AMP[n0] + (1) ATP[n0] + (1) H+[n0] <=> (2) ADP[n0]	RXN4FS-19.c	R_R00127_c	R00127_c
rxn00100_c0	(1) ATP[c0] + (1) Dephospho-CoA[c0] => (1) ADP[c0] + (1) CoA[c0] + (1) H+[c0]	DEPHOSPHOCOAKIN-RXN.c	R_R00130_c	R00130_c
rxn00101_c0	(2) H+[c0] + (1) H2O[c0] + (1) Urea[c0] => (1) CO2[c0] + (2) NH3[c0]	UREASE-RXN.c	R_R00131_c	R00131_c
rxn00102_c0	(1) H+[c0] + (1) HCO3-[c0] <=> (1) CO2[c0] + (1) H2O[c0]	CARBODEHYDRAT-RXN.c|RXN0-5224.c	R_R00132N_c	R00132N_c
rxn00103_c0	(1) Formate[c0] + (1) NADP+[c0] => (1) CO2[c0] + (1) NADPH[c0]	FORMATE-DEHYDROGENASE-NADP+-RXN.c
rxn00105_c0	(1) ATP[c0] + (1) Nicotinamide D-ribonucleotide[c0] <=> (1) Diphosphate[c0] + (1) NAD+[c0]	2.7.7.1-RXN.c
rxn00113_c0	(2) ATP[c0] + (1) CO2[c0] + (1) H2O[c0] + (1) NH3[c0] => (2) ADP[c0] + (1) Carbamoyl phosphate[c0] + (3) H+[c0] + (1) Orthophosphate[c0]	6.3.4.16-RXN.c	R_R00149_c	R00149_c
rxn00114_c0	(1) ATP[c0] + (1) CO2[c0] + (1) NH3[c0] <= (1) ADP[c0] + (1) Carbamoyl phosphate[c0] + (2) H+[c0]	CARBAMATE-KINASE-RXN.c
rxn00116_c0	(1) H2O[c0] + (1) UDP[c0] => (2) H+[c0] + (1) Orthophosphate[c0] + (1) UMP[c0]	NUCLEOSIDE-DIPHOSPHATASE-RXN.c.araexp.UDP_UMP|RXN-12197.c	R_R00155_c	R00155_c
rxn00116_g0	(1) H2O[g0] + (1) UDP[g0] => (2) H+[g0] + (1) Orthophosphate[g0] + (1) UMP[g0]	NUCLEOSIDE-DIPHOSPHATASE-RXN.c.araexp.UDP_UMP|RXN-12197.c	R_R00155_c	R00155_c
rxn00117_c0	(1) ATP[c0] + (1) UDP[c0] <=> (1) ADP[c0] + (1) UTP[c0]	NUCLEOSIDE-DIP-KIN-RXN.c.araexp.UDP_UTP|UDPKIN-RXN.c	R_R00156_c	R00156_c
rxn00117_x0	(1) ATP[x0] + (1) UDP[x0] <=> (1) ADP[x0] + (1) UTP[x0]	NUCLEOSIDE-DIP-KIN-RXN.c.araexp.UDP_UTP|UDPKIN-RXN.c	R_R00156_c	R00156_c
rxn00118_c0	(1) AMP[c0] + (1) H+[c0] + (1) UTP[c0] <=> (1) ADP[c0] + (1) UDP[c0]		R_R00157_c	R00157_c
rxn00119_c0	(1) ATP[c0] + (1) H+[c0] + (1) UMP[c0] <=> (1) ADP[c0] + (1) UDP[c0]	2.7.4.22-RXN.c|RXN-12002.c|UMPKI-RXN.c	R_R00158_c	R00158_c
rxn00120_c0	(1) H2O[c0] + (1) UTP[c0] => (1) H+[c0] + (1) Orthophosphate[c0] + (1) UDP[c0]	NUCLEOSIDE-TRIPHOSPHATASE-RXN.c.araexp.UDP_UTP|RXN-12196.c	R_R00159_c	R00159_c
rxn00120_g0	(1) H2O[g0] + (1) UTP[g0] => (1) H+[g0] + (1) Orthophosphate[g0] + (1) UDP[g0]	NUCLEOSIDE-TRIPHOSPHATASE-RXN.c.araexp.UDP_UTP|RXN-12196.c	R_R00159_c	R00159_c
rxn00121_c0	(1) FAD[c0] + (1) H2O[c0] => (1) AMP[c0] + (1) FMN[c0] + (2) H+[c0]	FAD-PYROPHOSPHATASE-RXN.c
rxn00122_c0	(1) ATP[c0] + (1) FMN[c0] <=> (1) Diphosphate[c0] + (1) FAD[c0]	FADSYN-RXN.c
rxn00123_c0	(1) H2O[c0] + (1) Pyridoxal phosphate[c0] <=> (1) Orthophosphate[c0] + (1) Pyridoxal[c0]	3.1.3.74-RXN.c
rxn00124_c0	(1) ATP[c0] + (1) Pyridoxal[c0] => (1) ADP[c0] + (1) H+[c0] + (1) Pyridoxal phosphate[c0]	PYRIDOXKIN-RXN.c	R_R00174_c	R00174_c
rxn00126_c0	(1) Diphosphate[c0] + (1) H+[c0] + (1) Orthophosphate[c0] + (1) S-Adenosyl-L-methionine[c0] <= (1) ATP[c0] + (1) H2O[c0] + (1) L-Methionine[c0]	S-ADENMETSYN-RXN.c	R_R00177_c	R00177_c
rxn00126_n0	(1) Diphosphate[n0] + (1) H+[n0] + (1) Orthophosphate[n0] + (1) S-Adenosyl-L-methionine[n0] <= (1) ATP[n0] + (1) H2O[n0] + (1) L-Methionine[n0]	S-ADENMETSYN-RXN.c	R_R00177_c	R00177_c
rxn00126_r0	(1) Diphosphate[r0] + (1) H+[r0] + (1) Orthophosphate[r0] + (1) S-Adenosyl-L-methionine[r0] <= (1) ATP[r0] + (1) H2O[r0] + (1) L-Methionine[r0]	S-ADENMETSYN-RXN.c	R_R00177_c	R00177_c
rxn00127_c0	(1) H+[c0] + (1) S-Adenosyl-L-methionine[c0] => (1) CO2[c0] + (1) S-Adenosylmethioninamine[c0]	SAMDECARB-RXN.c	R_R00178_c	R00178_c
rxn00128_c0	(1) S-Adenosyl-L-methionine[c0] <=> (1) 1-Aminocyclopropane-1-carboxylate[c0] + (1) 5'-Methylthioadenosine[c0] + (1) H+[c0]	4.4.1.14-RXN.c	R_R00179_c	R00179_c
rxn00130_c0	(1) AMP[c0] + (1) H+[c0] + (1) H2O[c0] => (1) IMP[c0] + (1) NH3[c0]	AMP-DEAMINASE-RXN.c	R_R00181_c	R00181_c
rxn00132_c0	(1) AMP[c0] + (1) H2O[c0] <=> (1) Adenosine[c0] + (1) Orthophosphate[c0]	5-NUCLEOTID-RXN.c.araexp.ADENOSINE_AMP|AMP-DEPHOSPHORYLATION-RXN.c	R_R00183_c	R00183_c
rxn00132_d0	(1) AMP[d0] + (1) H2O[d0] <=> (1) Adenosine[d0] + (1) Orthophosphate[d0]	5-NUCLEOTID-RXN.c.araexp.ADENOSINE_AMP|AMP-DEPHOSPHORYLATION-RXN.c	R_R00183_c	R00183_c
rxn00134_c0	(1) ATP[c0] + (1) Adenosine[c0] => (1) ADP[c0] + (1) AMP[c0] + (1) H+[c0]	ADENOSINE-KINASE-RXN.c	R_R00185_c	R00185_c
rxn00136_c0	(1) H2O[c0] + (1) P1,P3-Bis(5'-adenosyl) triphosphate[c0] => (1) ADP[c0] + (1) AMP[c0] + (1) H+[c0]	BIS5-ADENOSYL-TRIPHOSPHATASE-RXN.c	R_R00187_c	R00187_c
rxn00136_d0	(1) H2O[d0] + (1) P1,P3-Bis(5'-adenosyl) triphosphate[d0] => (1) ADP[d0] + (1) AMP[d0] + (1) H+[d0]	BIS5-ADENOSYL-TRIPHOSPHATASE-RXN.c	R_R00187_c	R00187_c
rxn00137_c0	(1) Adenosine 3',5'-bisphosphate[c0] + (1) H2O[c0] <=> (1) AMP[c0] + (1) Orthophosphate[c0]	325-BISPHOSPHATE-NUCLEOTIDASE-RXN.c
rxn00137_m0	(1) Adenosine 3',5'-bisphosphate[m0] + (1) H2O[m0] <=> (1) AMP[m0] + (1) Orthophosphate[m0]	325-BISPHOSPHATE-NUCLEOTIDASE-RXN.c
rxn00138_c0	(1) ATP[c0] + (1) Deamino-NAD+[c0] + (1) NH3[c0] => (1) AMP[c0] + (1) Diphosphate[c0] + (2) H+[c0] + (1) NAD+[c0]	NAD-SYNTH-NH3-RXN.c
rxn00139_c0	(1) AMP[c0] + (1) Diphosphate[c0] + (1) H+[c0] <= (1) 5-Phospho-alpha-D-ribose 1-diphosphate[c0] + (1) Adenine[c0]	ADENPRIBOSYLTRAN-RXN.c	R_R00190_c	R00190_c
rxn00140_c0	(1) 3',5'-Cyclic AMP[c0] + (1) H2O[c0] => (1) AMP[c0] + (1) H+[c0]		R_R00191_c	R00191_c
rxn00141_c0	(1) H2O[c0] + (1) S-Adenosyl-L-homocysteine[c0] <=> (1) Adenosine[c0] + (1) L-Homocysteine[c0]	ADENOSYLHOMOCYSTEINASE-RXN.c	R_R00192_c	R00192_c
rxn00143_c0	(1) H2O[c0] + (1) S-Adenosyl-L-homocysteine[c0] <=> (1) Adenine[c0] + (1) S-Ribosyl-L-homocysteine[c0]	ADENOSYLHOMOCYSTEINE-NUCLEOSIDASE-RXN.c
rxn00147_c0	(1) ATP[c0] + (1) H2O[c0] + (1) Pyruvate[c0] => (1) AMP[c0] + (3) H+[c0] + (1) Orthophosphate[c0] + (1) Phosphoenolpyruvate[c0]	PEPSYNTH-RXN.c
rxn00148_c0	(1) ATP[c0] + (1) Pyruvate[c0] <=> (1) ADP[c0] + (1) H+[c0] + (1) Phosphoenolpyruvate[c0]	PEPDEPHOS-RXN.c	R_R00200_c	R00200_c
rxn00151_c0	(1) ATP[c0] + (1) Orthophosphate[c0] + (1) Pyruvate[c0] => (1) AMP[c0] + (1) Diphosphate[c0] + (2) H+[c0] + (1) Phosphoenolpyruvate[c0]	PYRUVATEORTHOPHOSPHATE-DIKINASE-RXN.c
rxn00153_c0	(1) H2O[c0] + (1) Phosphoenolpyruvate[c0] => (1) Orthophosphate[c0] + (1) Pyruvate[c0]	PHOSPHOENOLPYRUVATE-PHOSPHATASE-RXN.c
rxn00154_c0	(1) CoA[c0] + (1) NAD+[c0] + (1) Pyruvate[c0] => (1) Acetyl-CoA[c0] + (1) CO2[c0] + (1) NADH[c0]	PYRUVDEH-RXN.c
rxn00159_c0	(1) (S)-Malate[c0] + (1) NAD+[c0] => (1) CO2[c0] + (1) NADH[c0] + (1) Pyruvate[c0]	MALIC-NAD-RXN.c	R_R00214_c	R00214_c
rxn00161_c0	(1) (S)-Malate[c0] + (1) NADP+[c0] => (1) CO2[c0] + (1) NADPH[c0] + (1) Pyruvate[c0]	MALIC-NADP-RXN.c		R00216_c
rxn00162_c0	(1) H+[c0] + (1) Oxaloacetate[c0] => (1) CO2[c0] + (1) Pyruvate[c0]	OXALODECARB-RXN.c
rxn00165_c0	(1) L-Serine[c0] => (1) NH3[c0] + (1) Pyruvate[c0]	4.3.1.17-RXN.c		R00220_c
rxn00165_m0	(1) L-Serine[m0] => (1) NH3[m0] + (1) Pyruvate[m0]	4.3.1.17-RXN.c		R00220_c
rxn00166_c0	(1) D-Serine[c0] => (1) NH3[c0] + (1) Pyruvate[c0]	DSERDEAM-RXN.c
rxn00168_c0	(1) H+[c0] + (1) Pyruvate[c0] => (1) Acetaldehyde[c0] + (1) CO2[c0]	RXN-6161.c
rxn00170_c0	(1) Acetyl-CoA[c0] + (1) H2O[c0] => (1) Acetate[c0] + (1) CoA[c0] + (1) H+[c0]	ACETYL-COA-HYDROLASE-RXN.c
rxn00171_c0	(1) Acetaldehyde[c0] + (1) CoA[c0] + (1) NAD+[c0] <=> (1) Acetyl-CoA[c0] + (1) H+[c0] + (1) NADH[c0]	ACETALD-DEHYDROG-RXN.c
rxn00172_c0	(1) ATP[c0] + (1) Acetate[c0] + (1) CoA[c0] <=> (1) ADP[c0] + (1) Acetyl-CoA[c0] + (1) Orthophosphate[c0]	ACETATE--COA-LIGASE-ADP-FORMING-RXN.c
rxn00174_c0	(1) H+[c0] + (1) Malonyl-CoA[c0] => (1) Acetyl-CoA[c0] + (1) CO2[c0]	MALONYL-COA-DECARBOXYLASE-RXN.c	R_R00233_c	R00233_c
rxn00175_c0	(1) ATP[c0] + (1) Acetate[c0] + (1) CoA[c0] => (1) AMP[c0] + (1) Acetyl-CoA[c0] + (1) Diphosphate[c0] + (1) H+[c0]
rxn00176_c0	(1) Acetyl adenylate[c0] + (1) CoA[c0] => (1) AMP[c0] + (1) Acetyl-CoA[c0] + (1) H+[c0]		R_R00236_c	R00236_c
rxn00178_c0	(2) Acetyl-CoA[c0] <=> (1) Acetoacetyl-CoA[c0] + (1) CoA[c0]	ACETYL-COA-ACETYLTRANSFER-RXN.c	R_R00238_c	R00238_c
rxn00179_c0	(1) ATP[c0] + (1) L-Glutamate[c0] <=> (1) ADP[c0] + (1) L-Glutamyl 5-phosphate[c0]	GLUTKIN-RXN.c	R_R00239_c	R00239_c
rxn00182_c0	(1) H2O[c0] + (1) L-Glutamate[c0] + (1) NAD+[c0] <=> (1) 2-Oxoglutarate[c0] + (1) H+[c0] + (1) NADH[c0] + (1) NH3[c0]	GLUTAMATE-DEHYDROGENASE-NADP+-RXN.c.araexp.NAD_NADH|GLUTAMATE-DEHYDROGENASE-RXN.c	R_R00243_c	R00243_c
rxn00183_c0	(1) H2O[c0] + (1) L-Glutamate 5-semialdehyde[c0] + (1) NAD+[c0] <=> (2) H+[c0] + (1) L-Glutamate[c0] + (1) NADH[c0]		R_R00245_c	R00245_c
rxn00184_c0	(1) H2O[c0] + (1) L-Glutamate[c0] + (1) NADP+[c0] <=> (1) 2-Oxoglutarate[c0] + (1) H+[c0] + (1) NADPH[c0] + (1) NH3[c0]	GLUTAMATE-DEHYDROGENASE-NADP+-RXN.c.araexp.NADP_NADPH|GLUTDEHYD-RXN.c
rxn00184_d0	(1) H2O[d0] + (1) L-Glutamate[d0] + (1) NADP+[d0] <=> (1) 2-Oxoglutarate[d0] + (1) H+[d0] + (1) NADPH[d0] + (1) NH3[d0]	GLUTAMATE-DEHYDROGENASE-NADP+-RXN.c.araexp.NADP_NADPH|GLUTDEHYD-RXN.c
rxn00186_c0	(1) ATP[c0] + (2) H2O[c0] + (1) Pidolic acid[c0] => (1) ADP[c0] + (1) H+[c0] + (1) L-Glutamate[c0] + (1) Orthophosphate[c0]	5-OXOPROLINASE-ATP-HYDROLYSING-RXN.c	R_R00251_c	R00251_c
rxn00187_c0	(1) ATP[c0] + (1) L-Glutamate[c0] + (1) NH3[c0] => (1) ADP[c0] + (1) H+[c0] + (1) L-Glutamine[c0] + (1) Orthophosphate[c0]	GLUTAMINESYN-RXN.c	R_R00253_c	R00253_c
rxn00189_c0	(1) H2O[c0] + (1) L-Glutamine[c0] => (1) L-Glutamate[c0] + (1) NH3[c0]	GLUTAMIN-RXN.c
rxn00189_d0	(1) H2O[d0] + (1) L-Glutamine[d0] => (1) L-Glutamate[d0] + (1) NH3[d0]	GLUTAMIN-RXN.c
rxn00189_n0	(1) H2O[n0] + (1) L-Glutamine[n0] => (1) L-Glutamate[n0] + (1) NH3[n0]	GLUTAMIN-RXN.c
rxn00189_w0	(1) H2O[w0] + (1) L-Glutamine[w0] => (1) L-Glutamate[w0] + (1) NH3[w0]	GLUTAMIN-RXN.c
rxn00190_c0	(1) ATP[c0] + (1) Deamino-NAD+[c0] + (1) H2O[c0] + (1) L-Glutamine[c0] => (1) AMP[c0] + (1) Diphosphate[c0] + (2) H+[c0] + (1) L-Glutamate[c0] + (1) NAD+[c0]	NAD-SYNTH-GLN-RXN.c	R_R00257_c	R00257_c
rxn00191_c0	(1) 2-Oxoglutarate[c0] + (1) L-Alanine[c0] <=> (1) L-Glutamate[c0] + (1) Pyruvate[c0]	ALANINE-AMINOTRANSFERASE-RXN.c|RXN-13698.c	R_R00258_c	R00258_c
rxn00192_c0	(1) Acetyl-CoA[c0] + (1) L-Glutamate[c0] => (1) CoA[c0] + (1) H+[c0] + (1) N-Acetyl-L-glutamate[c0]	N-ACETYLTRANSFER-RXN.c	R_R00259_c	R00259_c
rxn00194_c0	(1) H+[c0] + (1) L-Glutamate[c0] => (1) 4-Aminobutanoate[c0] + (1) CO2[c0]	GLUTDECARBOX-RXN.c	R_R00261_c	R00261_c
rxn00196_c0	(1) 2,5-Dioxopentanoate[c0] + (1) H2O[c0] + (1) NADP+[c0] <=> (1) 2-Oxoglutarate[c0] + (2) H+[c0] + (1) NADPH[c0]
rxn00196_d0	(1) 2,5-Dioxopentanoate[d0] + (1) H2O[d0] + (1) NADP+[d0] <=> (1) 2-Oxoglutarate[d0] + (2) H+[d0] + (1) NADPH[d0]
rxn00196_m0	(1) 2,5-Dioxopentanoate[m0] + (1) H2O[m0] + (1) NADP+[m0] <=> (1) 2-Oxoglutarate[m0] + (2) H+[m0] + (1) NADPH[m0]
rxn00199_c0	(1) H+[c0] + (1) Oxalosuccinate[c0] => (1) 2-Oxoglutarate[c0] + (1) CO2[c0]	RXN-8642.c
rxn00200_c0	(1) 2-Oxoglutaramate[c0] + (1) H2O[c0] => (1) 2-Oxoglutarate[c0] + (1) NH3[c0]
rxn00203_c0	(1) 2-Oxoglutarate[c0] + (1) H+[c0] => (1) CO2[c0] + (1) Succinate semialdehyde[c0]	RXN-7774.c
rxn00204_c0	(2) H+[c0] + (1) Oxalate[c0] + (1) Oxygen[c0] => (2) CO2[c0] + (1) Hydrogen peroxide[c0]	OXALATE-OXIDASE-RXN.c
rxn00205_c0	(2) Glutathione[c0] + (1) Hydrogen peroxide[c0] => (1) Glutathione disulfide[c0] + (2) H2O[c0]	GLUTATHIONE-PEROXIDASE-RXN.c		R00274_c
rxn00205_n0	(2) Glutathione[n0] + (1) Hydrogen peroxide[n0] => (1) Glutathione disulfide[n0] + (2) H2O[n0]	GLUTATHIONE-PEROXIDASE-RXN.c		R00274_c
rxn00206_c0	(2) H+[c0] + (2) O2.-[c0] <=> (1) Hydrogen peroxide[c0] + (1) Oxygen[c0]	SUPEROX-DISMUT-RXN.c
rxn00208_c0	(1) H2O[c0] + (1) Oxygen[c0] + (1) Pyridoxamine phosphate[c0] => (1) Hydrogen peroxide[c0] + (1) NH3[c0] + (1) Pyridoxal phosphate[c0]	PMPOXI-RXN.c
rxn00209_c0	(1) Oxygen[c0] + (1) Pyridoxine phosphate[c0] => (1) Hydrogen peroxide[c0] + (1) Pyridoxal phosphate[c0]	PNPOXI-RXN.c
rxn00211_c0	(1) H2O[c0] + (2) NAD+[c0] + (1) UDP-glucose[c0] <=> (3) H+[c0] + (2) NADH[c0] + (1) UDP-glucuronate[c0]	UGD-RXN.c.araexp.CPD-12575	R_R00286_c	R00286_c
rxn00213_c0	(1) D-Glucose 1-phosphate[c0] + (1) UTP[c0] <=> (1) Diphosphate[c0] + (1) UDP-glucose[c0]	GLUC1PURIDYLTRANS-RXN.c.araexp.CPD-12575|RXN-11505.c.araexp.CPD-12575_GLC-1-P	R_R00289_c	R00289_c
rxn00214_c0	(1) UDP-glucose[c0] <=> (1) UDP-D-galactose[c0]		R_R00291_c	R00291_c
rxn00215_c0	(1) UDP-glucose[c0] <=> (1) H2O[c0] + (1) UDP-4-dehydro-6-deoxy-D-glucose[c0]	UDP-GLUCOSE-46-DEHYDRATASE-RXN.c.araexp.CPD-12575		R00293_c
rxn00216_c0	(1) ATP[c0] + (1) D-Glucose[c0] => (1) ADP[c0] + (1) D-Glucose 6-phosphate[c0] + (1) H+[c0]
rxn00216_m0	(1) ATP[m0] + (1) D-Glucose[m0] => (1) ADP[m0] + (1) D-Glucose 6-phosphate[m0] + (1) H+[m0]
rxn00224_c0	(1) Fe2+[c0] + (1) Protoporphyrin[c0] <=> (2) H+[c0] + (1) Heme[c0]	PROTOHEMEFERROCHELAT-RXN.c	R_R00310_c	R00310_c
rxn00226_c0	(1) ATP[c0] + (1) Acetate[c0] => (1) Acetyl adenylate[c0] + (1) Diphosphate[c0]
rxn00227_c0	(1) Acetyl phosphate[c0] + (1) H2O[c0] => (1) Acetate[c0] + (1) H+[c0] + (1) Orthophosphate[c0]
rxn00236_c0	(1) GDP[c0] + (1) H2O[c0] => (1) GMP[c0] + (2) H+[c0] + (1) Orthophosphate[c0]	NUCLEOSIDE-DIPHOSPHATASE-RXN.c.araexp.GDP_GMP	R_R00328_c	R00328_c
rxn00237_c0	(1) ATP[c0] + (1) GDP[c0] <=> (1) ADP[c0] + (1) GTP[c0]	GDPKIN-RXN.c|NUCLEOSIDE-DIP-KIN-RXN.c.araexp.GDP_GTP	R_R00330_c	R00330_c
rxn00237_x0	(1) ATP[x0] + (1) GDP[x0] <=> (1) ADP[x0] + (1) GTP[x0]	GDPKIN-RXN.c|NUCLEOSIDE-DIP-KIN-RXN.c.araexp.GDP_GTP	R_R00330_c	R00330_c
rxn00239_c0	(1) ATP[c0] + (1) GMP[c0] + (1) H+[c0] <=> (1) ADP[c0] + (1) GDP[c0]	GUANYL-KIN-RXN.c	R_R00332_c	R00332_c
rxn00240_c0	(1) AMP[c0] + (1) Nucleoside triphosphate[c0] <= (1) ADP[c0] + (1) NDP[c0]
rxn00241_c0	(1) GTP[c0] + (1) H2O[c0] => (1) GDP[c0] + (1) H+[c0] + (1) Orthophosphate[c0]	3.6.5.5-RXN.c|NUCLEOSIDE-TRIPHOSPHATASE-RXN.c.araexp.GDP_GTP|RXN0-1021.c|RXN0-5462.c	R_R00335_c	R00335_c
rxn00241_g0	(1) GTP[g0] + (1) H2O[g0] => (1) GDP[g0] + (1) H+[g0] + (1) Orthophosphate[g0]	3.6.5.5-RXN.c|NUCLEOSIDE-TRIPHOSPHATASE-RXN.c.araexp.GDP_GTP|RXN0-1021.c|RXN0-5462.c	R_R00335_c	R00335_c
rxn00242_c0	(1) Guanosine 3',5'-bis(diphosphate)[c0] + (1) H2O[c0] => (1) Diphosphate[c0] + (1) GDP[c0]	PPGPPSYN-RXN.c
rxn00247_c0	(1) ATP[c0] + (1) Oxaloacetate[c0] => (1) ADP[c0] + (1) CO2[c0] + (1) Phosphoenolpyruvate[c0]	PEPCARBOXYKIN-RXN.c	R_R00341_c	R00341_c
rxn00247_n0	(1) ATP[n0] + (1) Oxaloacetate[n0] => (1) ADP[n0] + (1) CO2[n0] + (1) Phosphoenolpyruvate[n0]	PEPCARBOXYKIN-RXN.c	R_R00341_c	R00341_c
rxn00248_c0	(1) (S)-Malate[c0] + (1) NAD+[c0] <=> (1) H+[c0] + (1) NADH[c0] + (1) Oxaloacetate[c0]		R_R00342_c	R00342_c
rxn00249_c0	(1) (S)-Malate[c0] + (1) NADP+[c0] <=> (1) H+[c0] + (1) NADPH[c0] + (1) Oxaloacetate[c0]	MALATE-DEHYDROGENASE-NADP+-RXN.c
rxn00250_c0	(1) ATP[c0] + (1) HCO3-[c0] + (1) Pyruvate[c0] <=> (1) ADP[c0] + (1) H+[c0] + (1) Orthophosphate[c0] + (1) Oxaloacetate[c0]	PYRUVATE-CARBOXYLASE-RXN.c	R_R00344_c	R00344_c
rxn00251_c0	(1) H+[c0] + (1) Orthophosphate[c0] + (1) Oxaloacetate[c0] => (1) CO2[c0] + (1) H2O[c0] + (1) Phosphoenolpyruvate[c0]		R_R00345_c	R00345_c
rxn00252_c0	(1) Diphosphate[c0] + (1) Oxaloacetate[c0] => (1) CO2[c0] + (1) Orthophosphate[c0] + (1) Phosphoenolpyruvate[c0]	4.1.1.38-RXN.c
rxn00254_c0	(1) 2-Oxosuccinamate[c0] + (1) H2O[c0] => (1) NH3[c0] + (1) Oxaloacetate[c0]
rxn00254_d0	(1) 2-Oxosuccinamate[d0] + (1) H2O[d0] => (1) NH3[d0] + (1) Oxaloacetate[d0]
rxn00256_c0	(1) Citrate[c0] + (1) CoA[c0] + (1) H+[c0] <= (1) Acetyl-CoA[c0] + (1) H2O[c0] + (1) Oxaloacetate[c0]
rxn00257_c0	(1) ATP[c0] + (1) Citrate[c0] + (1) CoA[c0] <=> (1) ADP[c0] + (1) Acetyl-CoA[c0] + (1) Orthophosphate[c0] + (1) Oxaloacetate[c0]	ATP-CITRATE-PRO-S--LYASE-RXN.c	R_R00352_c	R00352_c
rxn00260_c0	(1) 2-Oxoglutarate[c0] + (1) L-Aspartate[c0] <=> (1) L-Glutamate[c0] + (1) Oxaloacetate[c0]	ASPAMINOTRANS-RXN.c|RXN-13697.c	R_R00355_c	R00355_c
rxn00262_c0	(1) H2O[c0] + (1) L-Aspartate[c0] + (1) Oxygen[c0] => (1) Hydrogen peroxide[c0] + (1) NH3[c0] + (1) Oxaloacetate[c0]	L-ASPARTATE-OXIDASE-RXN.c
rxn00272_c0	(1) Glyoxylate[c0] + (1) L-Alanine[c0] <=> (1) Glycine[c0] + (1) Pyruvate[c0]		R_R00369_c	R00369_c
rxn00275_c0	(1) 2-Oxoglutarate[c0] + (1) Glycine[c0] <=> (1) Glyoxylate[c0] + (1) L-Glutamate[c0]
rxn00285_c0	(1) ATP[c0] + (1) CoA[c0] + (1) Succinate[c0] <=> (1) ADP[c0] + (1) Orthophosphate[c0] + (1) Succinyl-CoA[c0]	SUCCCOASYN-RXN.c
rxn00287_c0	(1) H2O[c0] + (1) Succinyl-CoA[c0] => (1) CoA[c0] + (1) H+[c0] + (1) Succinate[c0]	SUCCINYL-COA-HYDROLASE-RXN.c
rxn00293_c0	(1) N-Acetyl-alpha-D-glucosamine 1-phosphate[c0] + (1) UTP[c0] <=> (1) Diphosphate[c0] + (1) UDP-N-acetyl-D-glucosamine[c0]	2.7.7.64-RXN.c.araexp.N-ACETYL-D-GLUCOSAMINE-1-P_UDP-N-ACETYL-D-GLUCOSAMINE|NAG1P-URIDYLTRANS-RXN.c	R_R00416_c	R00416_c
rxn00295_c0	(1) UDP-N-acetyl-D-glucosamine[c0] <=> (1) UDP-N-acetyl-D-galactosamine[c0]	UDP-N-ACETYLGLUCOSAMINE-4-EPIMERASE-RXN.c
rxn00299_c0	(1) GTP[c0] + (1) H2O[c0] <=> (1) 7,8-Dihydroneopterin 3'-triphosphate[c0] + (1) Formate[c0] + (1) H+[c0]	GTP-CYCLOHYDRO-I-RXN.c
rxn00300_c0	(1) GTP[c0] + (3) H2O[c0] => (1) 2,5-Diamino-6-(5-phospho-D-ribosylamino)pyrimidin-4(3H)-one[c0] + (1) Diphosphate[c0] + (1) Formate[c0] + (3) H+[c0]	GTP-CYCLOHYDRO-II-RXN.c	R_R00425_c	R00425_c
rxn00301_c0	(1) GTP[c0] + (1) H2O[c0] => (1) Diphosphate[c0] + (1) GMP[c0] + (2) H+[c0]	3.6.1.19-RXN.c.araexp.GMP_GTP	R_R00426_c	R00426_c
rxn00302_c0	(1) GTP[c0] + (1) H2O[c0] => (1) Formamidopyrimidine nucleoside triphosphate[c0]		R_R00428_c	R00428_c
rxn00303_c0	(1) ATP[c0] + (1) GTP[c0] => (1) AMP[c0] + (1) Guanosine 3'-diphosphate 5'-triphosphate[c0] + (2) H+[c0]	GTPPYPHOSKIN-RXN.c	R_R00429_c	R00429_c
rxn00304_c0	(1) GTP[c0] + (1) Pyruvate[c0] <=> (1) GDP[c0] + (1) H+[c0] + (1) Phosphoenolpyruvate[c0]			R00430_c
rxn00306_c0	(1) CoA[c0] + (1) GTP[c0] + (1) Succinate[c0] <=> (1) GDP[c0] + (1) Orthophosphate[c0] + (1) Succinyl-CoA[c0]	SUCCINATE--COA-LIGASE-GDP-FORMING-RXN.c		R00432_c
rxn00307_c0	(1) GTP[c0] => (1) 3',5'-Cyclic GMP[c0] + (1) Diphosphate[c0] + (1) H+[c0]	GUANYLCYC-RXN.c	R_R00434_c	R00434_c
rxn00313_c0	(1) H+[c0] + (1) meso-2,6-Diaminoheptanedioate[c0] => (1) CO2[c0] + (1) L-Lysine[c0]	DIAMINOPIMDECARB-RXN.c	R_R00451_c	R00451_c
rxn00319_c0	(1) L-Lysine[c0] => (1) H+[c0] + (1) L-Pipecolate[c0] + (1) NH3[c0]
rxn00322_c0	(1) H+[c0] + (1) L-Lysine[c0] => (1) CO2[c0] + (1) Cadaverine[c0]	LYSDECARBOX-RXN.c
rxn00324_c0	(1) Glycolate[c0] + (1) NADP+[c0] <=> (1) Glyoxylate[c0] + (1) H+[c0] + (1) NADPH[c0]	GLYOXYLATE-REDUCTASE-NADP+-RXN.c
rxn00327_c0	(1) (-)-Ureidoglycolate[c0] + (2) H+[c0] + (1) H2O[c0] => (1) CO2[c0] + (1) Glyoxylate[c0] + (2) NH3[c0]	UREIDOGLYCOLATE-HYDROLASE-RXN.c
rxn00330_c0	(1) (S)-Malate[c0] + (1) CoA[c0] + (1) H+[c0] <= (1) Acetyl-CoA[c0] + (1) Glyoxylate[c0] + (1) H2O[c0]	MALSYN-RXN.c
rxn00333_c0	(1) Glycolate[c0] + (1) Oxygen[c0] => (1) Glyoxylate[c0] + (1) Hydrogen peroxide[c0]	RXN-969.c
rxn00337_c0	(1) ATP[c0] + (1) L-Aspartate[c0] <=> (1) 4-Phospho-L-aspartate[c0] + (1) ADP[c0]	ASPARTATEKIN-RXN.c	R_R00480_c	R00480_c
rxn00338_c0	(1) L-Aspartate[c0] + (1) Oxygen[c0] <=> (1) H+[c0] + (1) Hydrogen peroxide[c0] + (1) Iminoaspartate[c0]	L-ASPARTATE-OXID-RXN.c	R_R00481_c	R00481_c
rxn00340_c0	(1) ATP[c0] + (1) L-Aspartate[c0] + (1) NH3[c0] => (1) AMP[c0] + (1) Diphosphate[c0] + (2) H+[c0] + (1) L-Asparagine[c0]	ASNSYNA-RXN.c
rxn00342_c0	(1) H2O[c0] + (1) L-Asparagine[c0] => (1) L-Aspartate[c0] + (1) NH3[c0]	ASPARAGHYD-RXN.c	R_R00485_c	R00485_c
rxn00342_n0	(1) H2O[n0] + (1) L-Asparagine[n0] => (1) L-Aspartate[n0] + (1) NH3[n0]	ASPARAGHYD-RXN.c	R_R00485_c	R00485_c
rxn00343_c0	(1) 3-Cyano-L-alanine[c0] + (2) H2O[c0] <=> (1) L-Aspartate[c0] + (1) NH3[c0]	3.5.5.4-RXN.c
rxn00343_n0	(1) 3-Cyano-L-alanine[n0] + (2) H2O[n0] <=> (1) L-Aspartate[n0] + (1) NH3[n0]	3.5.5.4-RXN.c
rxn00346_c0	(1) H+[c0] + (1) L-Aspartate[c0] => (1) CO2[c0] + (1) beta-Alanine[c0]		R_R00489_c	R00489_c
rxn00350_c0	(1) Glutathione[c0] + (1) H2O[c0] <=> (1) Cys-Gly[c0] + (1) L-Glutamate[c0]		R_R00494_c	R00494_c
rxn00351_c0	(1) ATP[c0] + (1) Glycine[c0] + (1) gamma-L-Glutamyl-L-cysteine[c0] => (1) ADP[c0] + (1) Glutathione[c0] + (1) H+[c0] + (1) Orthophosphate[c0]	GLUTATHIONE-SYN-RXN.c	R_R00497_c	R00497_c
rxn00355_c0	(1) UTP[c0] + (1) alpha-D-Galactose 1-phosphate[c0] <=> (1) Diphosphate[c0] + (1) UDP-D-galactose[c0]	UTPHEXPURIDYLYLTRANS-RXN.c	R_R00502_c	R00502_c
rxn00360_c0	(1) 3'-Phosphoadenylyl sulfate[c0] + (1) H2O[c0] <=> (1) Adenylyl sulfate[c0] + (1) Orthophosphate[c0]		R_R00508_c	R00508_c
rxn00360_m0	(1) 3'-Phosphoadenylyl sulfate[m0] + (1) H2O[m0] <=> (1) Adenylyl sulfate[m0] + (1) Orthophosphate[m0]		R_R00508_c	R00508_c
rxn00361_c0	(1) ATP[c0] + (1) Adenylyl sulfate[c0] => (1) 3'-Phosphoadenylyl sulfate[c0] + (1) ADP[c0] + (1) H+[c0]	ADENYLYLSULFKIN-RXN.c	R_R00509_c	R00509_c
rxn00361_n0	(1) ATP[n0] + (1) Adenylyl sulfate[n0] => (1) 3'-Phosphoadenylyl sulfate[n0] + (1) ADP[n0] + (1) H+[n0]	ADENYLYLSULFKIN-RXN.c	R_R00509_c	R00509_c
rxn00363_c0	(1) CMP[c0] + (1) H2O[c0] <=> (1) Cytidine[c0] + (1) Orthophosphate[c0]	5-NUCLEOTID-RXN.c.araexp.CMP_CYTIDINE	R_R00511_c	R00511_c
rxn00364_c0	(1) ATP[c0] + (1) CMP[c0] + (1) H+[c0] <=> (1) ADP[c0] + (1) CDP[c0]	CMPKI-RXN.c|RXN-11832.c	R_R00512_c	R00512_c
rxn00364_n0	(1) ATP[n0] + (1) CMP[n0] + (1) H+[n0] <=> (1) ADP[n0] + (1) CDP[n0]	CMPKI-RXN.c|RXN-11832.c	R_R00512_c	R00512_c
rxn00365_c0	(1) ATP[c0] + (1) Cytidine[c0] => (1) ADP[c0] + (1) CMP[c0] + (1) H+[c0]		R_R00513_c	R00513_c
rxn00365_d0	(1) ATP[d0] + (1) Cytidine[d0] => (1) ADP[d0] + (1) CMP[d0] + (1) H+[d0]		R_R00513_c	R00513_c
rxn00366_c0	(1) CDP[c0] + (1) H2O[c0] => (1) CMP[c0] + (2) H+[c0] + (1) Orthophosphate[c0]	NUCLEOSIDE-DIPHOSPHATASE-RXN.c.araexp.CDP_CMP|RXN-12198.c	R_R00514_c	R00514_c
rxn00366_g0	(1) CDP[g0] + (1) H2O[g0] => (1) CMP[g0] + (2) H+[g0] + (1) Orthophosphate[g0]	NUCLEOSIDE-DIPHOSPHATASE-RXN.c.araexp.CDP_CMP|RXN-12198.c	R_R00514_c	R00514_c
rxn00367_c0	(1) CTP[c0] + (1) H2O[c0] => (1) CMP[c0] + (1) Diphosphate[c0] + (2) H+[c0]	3.6.1.19-RXN.c.araexp.CMP_CTP
rxn00368_c0	(1) Cytidine[c0] + (1) UTP[c0] => (1) CMP[c0] + (1) H+[c0] + (1) UDP[c0]		R_R00516_c	R00516_c
rxn00368_d0	(1) Cytidine[d0] + (1) UTP[d0] => (1) CMP[d0] + (1) H+[d0] + (1) UDP[d0]		R_R00516_c	R00516_c
rxn00369_c0	(1) Cytidine[c0] + (1) GTP[c0] => (1) CMP[c0] + (1) GDP[c0] + (1) H+[c0]	CYTIDINEKIN-RXN.c	R_R00517_c	R00517_c
rxn00369_d0	(1) Cytidine[d0] + (1) GTP[d0] => (1) CMP[d0] + (1) GDP[d0] + (1) H+[d0]	CYTIDINEKIN-RXN.c	R_R00517_c	R00517_c
rxn00371_c0	(1) Formate[c0] + (1) NAD+[c0] => (1) CO2[c0] + (1) NADH[c0]	1.2.1.2-RXN.c
rxn00374_c0	(1) Formamide[c0] + (1) H2O[c0] => (1) Formate[c0] + (1) NH3[c0]	FORMAMIDASE-RXN.c
rxn00377_c0	(1) H2O[c0] + (1) S-Formylglutathione[c0] => (1) Formate[c0] + (1) Glutathione[c0] + (1) H+[c0]	S-FORMYLGLUTATHIONE-HYDROLASE-RXN.c
rxn00379_c0	(1) ATP[c0] + (1) Sulfate[c0] <=> (1) Adenylyl sulfate[c0] + (1) Diphosphate[c0]		R_R00529_c	R00529_c
rxn00379_n0	(1) ATP[n0] + (1) Sulfate[n0] <=> (1) Adenylyl sulfate[n0] + (1) Diphosphate[n0]		R_R00529_c	R00529_c
rxn00383_c0	(1) H2O[c0] + (1) Oxygen[c0] + (1) Sulfite[c0] => (1) H+[c0] + (1) Hydrogen peroxide[c0] + (1) Sulfate[c0]	SULFITE-OXIDASE-RXN.c	R_R00533_c	R00533_c
rxn00391_c0	(1) FMN[c0] + (1) H2O[c0] <=> (1) Orthophosphate[c0] + (1) Riboflavin[c0]		R_R00548_c	R00548_c
rxn00392_c0	(1) ATP[c0] + (1) Riboflavin[c0] => (1) ADP[c0] + (1) FMN[c0] + (1) H+[c0]	RIBOFLAVINKIN-RXN.c	R_R00549_c	R00549_c
rxn00394_c0	(1) H2O[c0] + (1) L-Arginine[c0] => (1) L-Ornithine[c0] + (1) Urea[c0]	ARGINASE-RXN.c	R_R00551_c	R00551_c
rxn00400_c0	(1) H+[c0] + (1) L-Arginine[c0] + (1) NADPH[c0] + (1) Oxygen[c0] => (1) H2O[c0] + (1) N-(omega)-Hydroxyarginine[c0] + (1) NADP+[c0]
rxn00400_d0	(1) H+[d0] + (1) L-Arginine[d0] + (1) NADPH[d0] + (1) Oxygen[d0] => (1) H2O[d0] + (1) N-(omega)-Hydroxyarginine[d0] + (1) NADP+[d0]
rxn00400_m0	(1) H+[m0] + (1) L-Arginine[m0] + (1) NADPH[m0] + (1) Oxygen[m0] => (1) H2O[m0] + (1) N-(omega)-Hydroxyarginine[m0] + (1) NADP+[m0]
rxn00401_c0	(1) L-Arginine[c0] + (1) Oxygen[c0] => (1) 4-Guanidinobutanamide[c0] + (1) CO2[c0] + (1) H2O[c0]	ARGININE-2-MONOOXYGENASE-RXN.c
rxn00405_c0	(1) H+[c0] + (1) L-Arginine[c0] => (1) Agmatine[c0] + (1) CO2[c0]	ARGDECARBOX-RXN.c	R_R00566_c	R00566_c
rxn00408_c0	(1) CTP[c0] + (1) H2O[c0] => (1) CDP[c0] + (1) H+[c0] + (1) Orthophosphate[c0]	NUCLEOSIDE-TRIPHOSPHATASE-RXN.c.araexp.CDP_CTP|RXN-12195.c	R_R00569_c	R00569_c
rxn00408_g0	(1) CTP[g0] + (1) H2O[g0] => (1) CDP[g0] + (1) H+[g0] + (1) Orthophosphate[g0]	NUCLEOSIDE-TRIPHOSPHATASE-RXN.c.araexp.CDP_CTP|RXN-12195.c	R_R00569_c	R00569_c
rxn00409_c0	(1) ATP[c0] + (1) CDP[c0] <=> (1) ADP[c0] + (1) CTP[c0]	CDPKIN-RXN.c|NUCLEOSIDE-DIP-KIN-RXN.c.araexp.CDP_CTP	R_R00570_c	R00570_c
rxn00409_x0	(1) ATP[x0] + (1) CDP[x0] <=> (1) ADP[x0] + (1) CTP[x0]	CDPKIN-RXN.c|NUCLEOSIDE-DIP-KIN-RXN.c.araexp.CDP_CTP	R_R00570_c	R00570_c
rxn00410_c0	(1) ATP[c0] + (1) NH3[c0] + (1) UTP[c0] <=> (1) ADP[c0] + (1) CTP[c0] + (2) H+[c0] + (1) Orthophosphate[c0]		R_R00571_c	R00571_c
rxn00412_c0	(1) ATP[c0] + (1) H2O[c0] + (1) L-Glutamine[c0] + (1) UTP[c0] => (1) ADP[c0] + (1) CTP[c0] + (2) H+[c0] + (1) L-Glutamate[c0] + (1) Orthophosphate[c0]	CTPSYN-RXN.c	R_R00573_c	R00573_c
rxn00414_c0	(2) ATP[c0] + (1) H2O[c0] + (1) HCO3-[c0] + (1) L-Glutamine[c0] => (2) ADP[c0] + (1) Carbamoyl phosphate[c0] + (2) H+[c0] + (1) L-Glutamate[c0] + (1) Orthophosphate[c0]	CARBPSYN-RXN.c	R_R00575_c	R00575_c
rxn00416_c0	(1) ATP[c0] + (1) H2O[c0] + (1) L-Aspartate[c0] + (1) L-Glutamine[c0] => (1) AMP[c0] + (1) Diphosphate[c0] + (2) H+[c0] + (1) L-Asparagine[c0] + (1) L-Glutamate[c0]	ASNSYNB-RXN.c	R_R00578_c	R00578_c
rxn00420_c0	(1) H2O[c0] + (1) O-Phospho-L-serine[c0] <=> (1) L-Serine[c0] + (1) Orthophosphate[c0]	PSERPHOSPHA-RXN.c.araexp.3-P-SERINE_SER|RXN0-5114.c	R_R00582_c	R00582_c
rxn00422_c0	(1) L-Serine[c0] + (1) Pyruvate[c0] <=> (1) Hydroxypyruvate[c0] + (1) L-Alanine[c0]
rxn00423_c0	(1) Acetyl-CoA[c0] + (1) L-Serine[c0] => (1) CoA[c0] + (1) O-Acetyl-L-serine[c0]	SERINE-O-ACETTRAN-RXN.c	R_R00586_c	R00586_c
rxn00423_n0	(1) Acetyl-CoA[n0] + (1) L-Serine[n0] => (1) CoA[n0] + (1) O-Acetyl-L-serine[n0]	SERINE-O-ACETTRAN-RXN.c	R_R00586_c	R00586_c
rxn00424_c0	(1) Glyoxylate[c0] + (1) L-Serine[c0] <=> (1) Glycine[c0] + (1) Hydroxypyruvate[c0]	SERINE--GLYOXYLATE-AMINOTRANSFERASE-RXN.c
rxn00425_c0	(1) L-Serine[c0] <=> (1) D-Serine[c0]	5.1.1.18-RXN.c		R00589_c
rxn00426_c0	(1) L-Serine[c0] => (1) Dehydroalanine[c0] + (1) H2O[c0]
rxn00427_c0	(1) Hydrogen peroxide[c0] + (1) Methanol[c0] => (1) Formaldehyde[c0] + (2) H2O[c0]		R_R00602_c	R00602_c
rxn00427_n0	(1) Hydrogen peroxide[n0] + (1) Methanol[n0] => (1) Formaldehyde[n0] + (2) H2O[n0]		R_R00602_c	R00602_c
rxn00427_w0	(1) Hydrogen peroxide[w0] + (1) Methanol[w0] => (1) Formaldehyde[w0] + (2) H2O[w0]		R_R00602_c	R00602_c
rxn00427_x0	(1) Hydrogen peroxide[x0] + (1) Methanol[x0] => (1) Formaldehyde[x0] + (2) H2O[x0]		R_R00602_c	R00602_c
rxn00429_c0	(1) Formaldehyde[c0] + (1) H2O[c0] + (1) NAD+[c0] <=> (1) Formate[c0] + (2) H+[c0] + (1) NADH[c0]	FORMALDEHYDE-DEHYDROGENASE-RXN.c
rxn00433_c0	(1) H2O[c0] + (1) Oxygen[c0] + (1) Sarcosine[c0] <=> (1) Formaldehyde[c0] + (1) Glycine[c0] + (1) Hydrogen peroxide[c0]	SARCOX-RXN.c	R_R00610_c	R00610_c
rxn00436_c0	(1) H2O[c0] + (1) Thiamin diphosphate[c0] => (2) H+[c0] + (1) Orthophosphate[c0] + (1) Thiamin monophosphate[c0]		R_R00615_c	R00615_c
rxn00437_c0	(1) ATP[c0] + (1) Thiamin diphosphate[c0] <=> (1) ADP[c0] + (1) Thiamin triphosphate[c0]	THIAMIN-DIPHOSPHATE-KINASE-RXN.c	R_R00616_c	R00616_c
rxn00438_c0	(1) ATP[c0] + (1) H+[c0] + (1) Thiamin monophosphate[c0] <=> (1) ADP[c0] + (1) Thiamin diphosphate[c0]	THI-P-KIN-RXN.c
rxn00440_c0	(1) ATP[c0] + (1) Thiamine[c0] => (1) AMP[c0] + (1) H+[c0] + (1) Thiamin diphosphate[c0]	THIAMIN-PYROPHOSPHOKINASE-RXN.c	R_R00619_c	R00619_c
rxn00441_c0	(1) 2-Oxoglutarate[c0] + (1) H+[c0] + (1) Thiamin diphosphate[c0] => (1) 3-Carboxy-1-hydroxypropyl-ThPP[c0] + (1) CO2[c0]
rxn00444_c0	(1) Ascorbate[c0] + (1) Hydrogen peroxide[c0] => (1) Dehydroascorbate[c0] + (2) H2O[c0]	L-ASCORBATE-PEROXIDASE-RXN.c|RXN-12440.c		R00644_c
rxn00444_x0	(1) Ascorbate[x0] + (1) Hydrogen peroxide[x0] => (1) Dehydroascorbate[x0] + (2) H2O[x0]	L-ASCORBATE-PEROXIDASE-RXN.c|RXN-12440.c		R00644_c
rxn00448_c0	(1) Ascorbate[c0] + (1) H2O[c0] + (1) Oxygen[c0] <=> (2) H+[c0] + (1) Oxalate[c0] + (1) Threonate[c0]	ASCORBATE-23-DIOXYGENASE-RXN.c
rxn00451_c0	(1) L-Methionine[c0] + (1) S-Adenosyl-L-methionine[c0] <=> (1) S-Adenosyl-L-homocysteine[c0] + (1) S-Methyl-L-methionine[c0]	METHIONINE-S-METHYLTRANSFERASE-RXN.c		R00649_c
rxn00452_c0	(1) L-Homocysteine[c0] + (1) S-Adenosyl-L-methionine[c0] => (1) H+[c0] + (1) L-Methionine[c0] + (1) S-Adenosyl-L-homocysteine[c0]	HOMOCYSTEINE-S-METHYLTRANSFERASE-RXN.c	R_R00650_c	R00650_c
rxn00453_c0	(1) Methanethiol[c0] + (1) O-Acetyl-L-homoserine[c0] <= (1) Acetate[c0] + (1) H+[c0] + (1) L-Methionine[c0]
rxn00454_c0	(1) Glyoxylate[c0] + (1) L-Methionine[c0] <=> (1) 4-Methylthio-2-oxobutanoic acid[c0] + (1) Glycine[c0]	R15-RXN.c.araexp.GLY_GLYOX
rxn00456_c0	(1) H2O[c0] + (1) L-Methionine[c0] <=> (1) 2-Oxobutanoate[c0] + (1) Methanethiol[c0] + (1) NH3[c0]	METHIONINE-GAMMA-LYASE-RXN.c
rxn00459_c0	(1) 2-Phospho-D-glycerate[c0] <=> (1) H2O[c0] + (1) Phosphoenolpyruvate[c0]	2PGADEHYDRAT-RXN.c	R_R00658_c	R00658_c
rxn00463_c0	(1) H2O[c0] + (1) UTP[c0] => (1) Diphosphate[c0] + (2) H+[c0] + (1) UMP[c0]	3.6.1.19-RXN.c.araexp.UMP_UTP	R_R00662_c	R00662_c
rxn00467_c0	(1) 2-Oxoglutarate[c0] + (1) L-Ornithine[c0] <=> (1) L-Glutamate[c0] + (1) L-Glutamate 5-semialdehyde[c0]	RXN-7562.c	R_R00667_c	R00667_c
rxn00469_c0	(1) H2O[c0] + (1) N-Acetylornithine[c0] <=> (1) Acetate[c0] + (1) L-Ornithine[c0]	ACETYLORNDEACET-RXN.c	R_R00669_c	R00669_c
rxn00470_c0	(1) H+[c0] + (1) L-Ornithine[c0] => (1) CO2[c0] + (1) Putrescine[c0]	ORNDECARBOX-RXN.c
rxn00474_c0	(1) Indole[c0] + (1) L-Serine[c0] <=> (1) H2O[c0] + (1) L-Tryptophan[c0]
rxn00483_c0	(1) 2-Oxoglutarate[c0] + (1) L-Tryptophan[c0] <=> (1) Indolepyruvate[c0] + (1) L-Glutamate[c0]	TRYPTOPHAN-AMINOTRANSFERASE-RXN.c
rxn00484_c0	(1) H+[c0] + (1) L-Tryptophan[c0] => (1) CO2[c0] + (1) Tryptamine[c0]	AROMATIC-L-AMINO-ACID-DECARBOXYLASE-RXN.c		R00685_c
rxn00485_c0	(1) ATP[c0] + (1) H2O[c0] + (1) L-Phenylalanine[c0] => (1) AMP[c0] + (1) D-Phenylalanine[c0] + (1) Diphosphate[c0] + (2) H+[c0]	5.1.1.11-RXN.c
rxn00490_c0	(1) H+[c0] + (1) L-Arogenate[c0] => (1) CO2[c0] + (1) H2O[c0] + (1) L-Phenylalanine[c0]		R_R00691_c	R00691_c
rxn00491_c0	(1) L-Phenylalanine[c0] + (1) Pyruvate[c0] <=> (1) L-Alanine[c0] + (1) Phenylpyruvate[c0]	2.6.1.58-RXN.c
rxn00493_c0	(1) 2-Oxoglutarate[c0] + (1) L-Phenylalanine[c0] <=> (1) L-Glutamate[c0] + (1) Phenylpyruvate[c0]	PHEAMINOTRANS-RXN.c|RXN-10814.c	R_R00694_c	R00694_c
rxn00493_x0	(1) 2-Oxoglutarate[x0] + (1) L-Phenylalanine[x0] <=> (1) L-Glutamate[x0] + (1) Phenylpyruvate[x0]	PHEAMINOTRANS-RXN.c|RXN-10814.c	R_R00694_c	R00694_c
rxn00495_c0	(1) L-Phenylalanine[c0] => (1) NH3[c0] + (1) trans-Cinnamate[c0]	PHENYLALANINE-AMMONIA-LYASE-RXN.c	R_R00697_c	R00697_c
rxn00497_c0	(1) H+[c0] + (1) L-Phenylalanine[c0] => (1) CO2[c0] + (1) Phenethylamine[c0]	PHENYLALANINE-DECARBOXYLASE-RXN.c		R00699_c
rxn00498_c0	(2) trans,trans-Farnesyl diphosphate[c0] => (1) Diphosphate[c0] + (1) H+[c0] + (1) Presqualene diphosphate[c0]	2.5.1.21-RXN.c|RXN-12263.c	R_R00702_c	R00702_c
rxn00499_c0	(1) (S)-Lactate[c0] + (1) NAD+[c0] <=> (1) H+[c0] + (1) NADH[c0] + (1) Pyruvate[c0]	L-LACTATE-DEHYDROGENASE-RXN.c	R_R00703_c	R00703_c
rxn00500_c0	(1) (R)-Lactate[c0] + (1) NAD+[c0] <=> (1) H+[c0] + (1) NADH[c0] + (1) Pyruvate[c0]	DLACTDEHYDROGNAD-RXN.c
rxn00501_c0	(1) 3-Oxopropanoate[c0] + (1) CoA[c0] + (1) NAD+[c0] => (1) Acetyl-CoA[c0] + (1) CO2[c0] + (1) NADH[c0]		R_R00705_c	R00705_c
rxn00502_c0	(1) 3-Oxopropanoate[c0] + (1) CoA[c0] + (1) NADP+[c0] => (1) Acetyl-CoA[c0] + (1) CO2[c0] + (1) NADPH[c0]
rxn00503_c0	(1) (S)-1-Pyrroline-5-carboxylate[c0] + (2) H2O[c0] + (1) NAD+[c0] <=> (1) H+[c0] + (1) L-Glutamate[c0] + (1) NADH[c0]
rxn00504_c0	(1) (S)-1-Pyrroline-5-carboxylate[c0] + (2) H2O[c0] + (1) NADP+[c0] <=> (1) H+[c0] + (1) L-Glutamate[c0] + (1) NADPH[c0]
rxn00506_c0	(1) Acetaldehyde[c0] + (1) H2O[c0] + (1) NAD+[c0] => (1) Acetate[c0] + (2) H+[c0] + (1) NADH[c0]	RXN66-3.c	R_R00710_c	R00710_c
rxn00507_c0	(1) Acetaldehyde[c0] + (1) H2O[c0] + (1) NADP+[c0] => (1) Acetate[c0] + (2) H+[c0] + (1) NADPH[c0]			R00711_c
rxn00508_c0	(1) H2O[c0] + (1) NAD+[c0] + (1) Succinate semialdehyde[c0] <=> (2) H+[c0] + (1) NADH[c0] + (1) Succinate[c0]	SUCCINATE-SEMIALDEHYDE-DEHYDROGENASE-RXN.c	R_R00713_c	R00713_c
rxn00509_c0	(1) H2O[c0] + (1) NADP+[c0] + (1) Succinate semialdehyde[c0] <=> (2) H+[c0] + (1) NADPH[c0] + (1) Succinate[c0]	SUCCSEMIALDDEHYDROG-RXN.c		R00714_c
rxn00510_c0	(1) H2O[c0] + (1) N6-(L-1,3-Dicarboxypropyl)-L-lysine[c0] + (1) NAD+[c0] <=> (1) 2-Oxoglutarate[c0] + (1) H+[c0] + (1) L-Lysine[c0] + (1) NADH[c0]	1.5.1.7-RXN.c	R_R00715_c	R00715_c
rxn00511_c0	(1) H2O[c0] + (1) N6-(L-1,3-Dicarboxypropyl)-L-lysine[c0] + (1) NADP+[c0] <=> (1) 2-Oxoglutarate[c0] + (1) H+[c0] + (1) L-Lysine[c0] + (1) NADPH[c0]	1.5.1.8-RXN.c	R_R00716_c	R00716_c
rxn00512_c0	(1) Glycolate[c0] + (1) NAD+[c0] <=> (1) Glyoxylate[c0] + (1) H+[c0] + (1) NADH[c0]	GLYCOLATE-REDUCTASE-RXN.c
rxn00513_c0	(1) H2O[c0] + (1) ITP[c0] => (1) H+[c0] + (1) IDP[c0] + (1) Orthophosphate[c0]		R_R00719_c	R00719_c
rxn00513_g0	(1) H2O[g0] + (1) ITP[g0] => (1) H+[g0] + (1) IDP[g0] + (1) Orthophosphate[g0]		R_R00719_c	R00719_c
rxn00514_c0	(1) H2O[c0] + (1) ITP[c0] => (1) Diphosphate[c0] + (2) H+[c0] + (1) IMP[c0]	3.6.1.19-RXN.c.araexp.IMP_ITP	R_R00720_c	R00720_c
rxn00515_c0	(1) ATP[c0] + (1) IDP[c0] <=> (1) ADP[c0] + (1) ITP[c0]		R_R00722_c	R00722_c
rxn00515_n0	(1) ATP[n0] + (1) IDP[n0] <=> (1) ADP[n0] + (1) ITP[n0]		R_R00722_c	R00722_c
rxn00515_x0	(1) ATP[x0] + (1) IDP[x0] <=> (1) ADP[x0] + (1) ITP[x0]		R_R00722_c	R00722_c
rxn00520_c0	(1) CoA[c0] + (1) ITP[c0] + (1) Succinate[c0] <=> (1) IDP[c0] + (1) Orthophosphate[c0] + (1) Succinyl-CoA[c0]
rxn00523_c0	(1) L-Tyrosine[c0] + (1) NADPH[c0] + (1) Oxygen[c0] => (1) H2O[c0] + (1) N-Hydroxy-L-tyrosine[c0] + (1) NADP+[c0]	TYROSINE-N-MONOOXYGENASE-RXN.c
rxn00525_c0	(1) L-Arogenate[c0] + (1) NAD+[c0] => (1) CO2[c0] + (1) L-Tyrosine[c0] + (1) NADH[c0]	CYCLOHEXADIENYL-DEHYDROGENASE-RXN.c
rxn00526_c0	(1) L-Arogenate[c0] + (1) NADP+[c0] => (1) CO2[c0] + (1) L-Tyrosine[c0] + (1) NADPH[c0]
rxn00527_c0	(1) 2-Oxoglutarate[c0] + (1) L-Tyrosine[c0] <=> (1) 3-(4-Hydroxyphenyl)pyruvate[c0] + (1) L-Glutamate[c0]	2.6.1.57-RXN.c.araexp.P-HYDROXY-PHENYLPYRUVATE_TYR|TYRAMINOTRANS-RXN.c|TYROSINE-AMINOTRANSFERASE-RXN.c	R_R00734_c	R00734_c
rxn00529_c0	(1) H+[c0] + (1) L-Tyrosine[c0] => (1) CO2[c0] + (1) Tyramine[c0]	TYROSINE-DECARBOXYLASE-RXN.c	R_R00736_c	R00736_c
rxn00530_c0	(1) L-Tyrosine[c0] => (1) 4-Coumarate[c0] + (1) NH3[c0]		R_R00737_c	R00737_c
rxn00532_c0	(1) 3-Oxopropanoate[c0] + (1) CoA[c0] + (1) NADP+[c0] <=> (1) H+[c0] + (1) Malonyl-CoA[c0] + (1) NADPH[c0]
rxn00532_m0	(1) 3-Oxopropanoate[m0] + (1) CoA[m0] + (1) NADP+[m0] <=> (1) H+[m0] + (1) Malonyl-CoA[m0] + (1) NADPH[m0]
rxn00533_c0	(1) ATP[c0] + (1) Acetyl-CoA[c0] + (1) HCO3-[c0] <=> (1) ADP[c0] + (1) H+[c0] + (1) Malonyl-CoA[c0] + (1) Orthophosphate[c0]		R_R00742_c	R00742_c
rxn00536_c0	(1) Ethanol[c0] + (1) NADP+[c0] <=> (1) Acetaldehyde[c0] + (1) H+[c0] + (1) NADPH[c0]	RXN-12484.c
rxn00541_c0	(1) L-Threonine[c0] <=> (1) Acetaldehyde[c0] + (1) Glycine[c0]	THREONINE-ALDOLASE-RXN.c
rxn00543_c0	(1) Ethanol[c0] + (1) NAD+[c0] <=> (1) Acetaldehyde[c0] + (1) H+[c0] + (1) NADH[c0]	ALCOHOL-DEHYDROG-RXN.c	R_R00754_c	R00754_c
rxn00543_w0	(1) Ethanol[w0] + (1) NAD+[w0] <=> (1) Acetaldehyde[w0] + (1) H+[w0] + (1) NADH[w0]	ALCOHOL-DEHYDROG-RXN.c	R_R00754_c	R00754_c
rxn00544_c0	(1) Acetaldehyde[c0] + (1) Thiamin diphosphate[c0] <=> (1) 2-(alpha-Hydroxyethyl)thiamine diphosphate[c0]		R_R00755_c	R00755_c
rxn00546_c0	(1) D-Mannitol 1-phosphate[c0] + (1) NAD+[c0] <= (1) D-Fructose 6-phosphate[c0] + (1) H+[c0] + (1) NADH[c0]
rxn00549_c0	(1) D-Fructose 1,6-bisphosphate[c0] + (1) H2O[c0] <=> (1) D-Fructose 6-phosphate[c0] + (1) Orthophosphate[c0]		R_R00762_c	R00762_c
rxn00558_c0	(1) D-Glucose 6-phosphate[c0] => (1) D-Fructose 6-phosphate[c0]			R00771_c
rxn00560_c0	(1) ATP[c0] + (1) HCO3-[c0] + (1) Urea[c0] => (1) ADP[c0] + (1) H+[c0] + (1) Orthophosphate[c0] + (1) Urea-1-carboxylate[c0]
rxn00562_c0	(1) (-)-Ureidoglycolate[c0] <=> (1) Glyoxylate[c0] + (1) Urea[c0]	UREIDOGLYCOLATE-LYASE-RXN.c	R_R00776_c	R00776_c
rxn00562_d0	(1) (-)-Ureidoglycolate[d0] <=> (1) Glyoxylate[d0] + (1) Urea[d0]	UREIDOGLYCOLATE-LYASE-RXN.c	R_R00776_c	R00776_c
rxn00562_m0	(1) (-)-Ureidoglycolate[m0] <=> (1) Glyoxylate[m0] + (1) Urea[m0]	UREIDOGLYCOLATE-LYASE-RXN.c	R_R00776_c	R00776_c
rxn00566_c0	(1) H2O[c0] + (1) L-Cysteine[c0] => (1) H+[c0] + (1) Hydrogen sulfide[c0] + (1) NH3[c0] + (1) Pyruvate[c0]		R_R00782_c	R00782_c
rxn00571_c0	(1) H2O[c0] + (1) NAD+[c0] + (1) Nitrite[c0] <= (1) H+[c0] + (1) NADH[c0] + (1) Nitrate[c0]	NITRATE-REDUCTASE-NADH-RXN.c|NITRATE-REDUCTASE-NADPORNOPH-RXN.c.araexp.NAD_NADH	R_R00794_c	R00794_c
rxn00572_c0	(1) H2O[c0] + (1) NADP+[c0] + (1) Nitrite[c0] <= (1) H+[c0] + (1) NADPH[c0] + (1) Nitrate[c0]	NITRATE-REDUCTASE-NADPH-RXN.c|NITRATE-REDUCTASE-NADPORNOPH-RXN.c.araexp.NADP_NADPH
rxn00578_c0	(1) H2O[c0] + (1) Sucrose 6'-phosphate[c0] <=> (1) Orthophosphate[c0] + (1) Sucrose[c0]	SUCROSE-PHOSPHATASE-RXN.c	R_R00805_c	R00805_c
rxn00579_c0	(1) D-Fructose[c0] + (1) UDP-glucose[c0] <=> (1) Sucrose[c0] + (1) UDP[c0]		R_R00806_c	R00806_c
rxn00579_d0	(1) D-Fructose[d0] + (1) UDP-glucose[d0] <=> (1) Sucrose[d0] + (1) UDP[d0]		R_R00806_c	R00806_c
rxn00585_c0	(1) NADP+[c0] + (1) trans-1,2-Dihydrobenzene-1,2-diol[c0] <=> (1) Catechol[c0] + (1) H+[c0] + (1) NADPH[c0]	1.3.1.20-RXN.c
rxn00611_c0	(1) NAD+[c0] + (1) sn-Glycerol 3-phosphate[c0] <=> (1) Glycerone phosphate[c0] + (1) H+[c0] + (1) NADH[c0]		R_R00842_c	R00842_c
rxn00615_c0	(1) ATP[c0] + (1) Glycerol[c0] => (1) ADP[c0] + (1) H+[c0] + (1) sn-Glycerol 3-phosphate[c0]	GLYCEROL-KIN-RXN.c	R_R00847_c	R00847_c
rxn00616_c0	(1) FAD[c0] + (1) H+[c0] + (1) sn-Glycerol 3-phosphate[c0] => (1) FADH2[c0] + (1) Glycerone phosphate[c0]		R_R00848_c	R00848_c
rxn00620_c0	(1) CDP-glycerol[c0] + (1) H2O[c0] => (1) CMP[c0] + (2) H+[c0] + (1) sn-Glycerol 3-phosphate[c0]	CDP-GLYCEROL-PYROPHOSPHATASE-RXN.c
rxn00621_c0	(1) CTP[c0] + (1) sn-Glycerol 3-phosphate[c0] => (1) CDP-glycerol[c0] + (1) Diphosphate[c0]
rxn00634_c0	(1) D-Sorbitol[c0] + (1) NAD+[c0] <=> (1) D-Fructose[c0] + (1) H+[c0] + (1) NADH[c0]		R_R00875_c	R00875_c
rxn00640_c0	(1) D-Mannose 1-phosphate[c0] + (1) GDP[c0] <= (1) GDP-mannose[c0] + (1) Orthophosphate[c0]	MANNPGUANYLTRANGDP-RXN.c	R_R00883_c	R00883_c
rxn00641_c0	(1) D-Mannose 1-phosphate[c0] + (1) GTP[c0] <=> (1) Diphosphate[c0] + (1) GDP-mannose[c0]	2.7.7.13-RXN.c
rxn00642_c0	(1) GDP-mannose[c0] => (1) GDP-4-dehydro-6-deoxy-D-mannose[c0] + (1) H2O[c0]	GDPMANDEHYDRA-RXN.c	R_R00888_c	R00888_c
rxn00643_c0	(1) GDP-mannose[c0] <=> (1) GDP-L-galactose[c0]	RXN-1882.c	R_R00889_c	R00889_c
rxn00646_c0	(1) ATP[c0] + (1) L-Cysteine[c0] + (1) L-Glutamate[c0] => (1) ADP[c0] + (1) H+[c0] + (1) Orthophosphate[c0] + (1) gamma-L-Glutamyl-L-cysteine[c0]		R_R00894_c	R00894_c
rxn00649_c0	(1) Hydrogen sulfide[c0] + (1) O-Acetyl-L-serine[c0] <=> (1) Acetate[c0] + (1) L-Cysteine[c0]	ACSERLY-RXN.c	R_R00897_c	R00897_c
rxn00650_c0	(1) Cys-Gly[c0] + (1) H2O[c0] <=> (1) Glycine[c0] + (1) L-Cysteine[c0]	RXN-6622.c	R_R00899_c	R00899_c
rxn00653_c0	(1) 3-Aminopropanal[c0] + (1) H2O[c0] + (1) NAD+[c0] <=> (2) H+[c0] + (1) NADH[c0] + (1) beta-Alanine[c0]	RXN-6382.c.araexp.NAD_NADH	R_R00904_c	R00904_c
rxn00654_c0	(1) 3-Ureidopropionate[c0] + (2) H+[c0] + (1) H2O[c0] => (1) CO2[c0] + (1) NH3[c0] + (1) beta-Alanine[c0]	BETA-UREIDOPROPIONASE-RXN.c	R_R00905_c	R00905_c
rxn00656_c0	(1) 3-Oxopropanoate[c0] + (1) L-Alanine[c0] <=> (1) Pyruvate[c0] + (1) beta-Alanine[c0]	2.6.1.18-RXN.c
rxn00657_c0	(1) 2-Oxoglutarate[c0] + (1) beta-Alanine[c0] <=> (1) 3-Oxopropanoate[c0] + (1) L-Glutamate[c0]	RXN-2901.c
rxn00668_c0	(1) NADP+[c0] + (1) Propanoyl-CoA[c0] <= (1) H+[c0] + (1) NADPH[c0] + (1) Propenoyl-CoA[c0]			R00919_c
rxn00673_c0	(1) FAD[c0] + (1) H+[c0] + (1) Propanoyl-CoA[c0] <=> (1) FADH2[c0] + (1) Propenoyl-CoA[c0]		R_R00924_c	R00924_c
rxn00674_c0	(1) ATP[c0] + (1) CoA[c0] + (1) Propanoate[c0] <=> (1) AMP[c0] + (1) Diphosphate[c0] + (1) H+[c0] + (1) Propanoyl-CoA[c0]	PROPIONATE--COA-LIGASE-RXN.c
rxn00675_c0	(1) CoA[c0] + (1) Propionyladenylate[c0] => (1) AMP[c0] + (1) H+[c0] + (1) Propanoyl-CoA[c0]			R00926_c
rxn00676_c0	(1) Acetyl-CoA[c0] + (1) Propanoyl-CoA[c0] <=> (1) 2-Methylacetoacetyl-CoA[c0] + (1) CoA[c0]	METHYLACETOACETYLCOATHIOL-RXN.c	R_R00927_c	R00927_c
rxn00684_c0	(1) NAD+[c0] + (1) Tetrahydrofolate[c0] <=> (1) Dihydrofolate[c0] + (1) H+[c0] + (1) NADH[c0]		R_R00936_c	R00936_c
rxn00686_c0	(1) NADP+[c0] + (1) Tetrahydrofolate[c0] <=> (1) Dihydrofolate[c0] + (1) H+[c0] + (1) NADPH[c0]	DIHYDROFOLATEREDUCT-RXN.c		R00939_c
rxn00689_c0	(1) ATP[c0] + (1) L-Glutamate[c0] + (1) Tetrahydrofolate[c0] => (1) ADP[c0] + (1) H+[c0] + (1) Orthophosphate[c0] + (1) Tetrahydrofolyl-[Glu](2)[c0]	RXN-6102.c	R_R00942_c	R00942_c
rxn00690_c0	(1) ATP[c0] + (1) Formate[c0] + (1) Tetrahydrofolate[c0] <=> (1) 10-Formyltetrahydrofolate[c0] + (1) ADP[c0] + (1) Orthophosphate[c0]	FORMATETHFLIG-RXN.c	R_R00943_c	R00943_c
rxn00691_c0	(1) 10-Formyltetrahydrofolate[c0] + (1) H2O[c0] => (1) Formate[c0] + (1) H+[c0] + (1) Tetrahydrofolate[c0]	FORMYLTHFDEFORMYL-RXN.c	R_R00944_c	R00944_c
rxn00692_c0	(1) 5,10-Methylenetetrahydrofolate[c0] + (1) Glycine[c0] + (1) H2O[c0] <=> (1) L-Serine[c0] + (1) Tetrahydrofolate[c0]		R_R00945_c	R00945_c
rxn00693_c0	(1) 5-Methyltetrahydrofolate[c0] + (1) L-Homocysteine[c0] <=> (1) L-Methionine[c0] + (1) Tetrahydrofolate[c0]	HOMOCYSMETB12-RXN.c	R_R00946_c	R00946_c
rxn00695_c0	(1) ATP[c0] + (1) D-Glucose 1-phosphate[c0] <=> (1) ADP-glucose[c0] + (1) Diphosphate[c0]		R_R00948_c	R00948_c
rxn00697_c0	(1) ADP-glucose[c0] + (1) H2O[c0] => (1) AMP[c0] + (1) D-Glucose 1-phosphate[c0] + (2) H+[c0]	ADPSUGPPHOSPHAT-RXN.c.araexp.ADP-D-GLUCOSE_GLC-1-P|RXN-10770.c	R_R00951_c	R00951_c
rxn00700_c0	(1) D-Glucose 1-phosphate[c0] + (1) GTP[c0] <=> (1) Diphosphate[c0] + (1) GDP-glucose[c0]	2.7.7.34-RXN.c
rxn00701_c0	(1) UDP-glucose[c0] + (1) alpha-D-Galactose 1-phosphate[c0] <=> (1) D-Glucose 1-phosphate[c0] + (1) UDP-D-galactose[c0]
rxn00704_c0	(1) D-Glucose 1-phosphate[c0] <=> (1) alpha-D-Glucose 6-phosphate[c0]	PHOSPHOGLUCMUT-RXN.c	R_R00959_c	R00959_c
rxn00706_c0	(1) H2O[c0] + (1) IDP[c0] <=> (2) H+[c0] + (1) IMP[c0] + (1) Orthophosphate[c0]		R_R00961_c	R00961_c
rxn00706_g0	(1) H2O[g0] + (1) IDP[g0] => (2) H+[g0] + (1) IMP[g0] + (1) Orthophosphate[g0]		R_R00961_c	R00961_c
rxn00707_c0	(1) Cytidine[c0] + (1) ITP[c0] => (1) CMP[c0] + (1) H+[c0] + (1) IDP[c0]		R_R00962_c	R00962_c
rxn00707_d0	(1) Cytidine[d0] + (1) ITP[d0] => (1) CMP[d0] + (1) H+[d0] + (1) IDP[d0]		R_R00962_c	R00962_c
rxn00708_c0	(1) H2O[c0] + (1) UMP[c0] <=> (1) Orthophosphate[c0] + (1) Uridine[c0]	5-NUCLEOTID-RXN.c.araexp.UMP_URIDINE|RXNQT-4150.c	R_R00963_c	R00963_c
rxn00708_d0	(1) H2O[d0] + (1) UMP[d0] <=> (1) Orthophosphate[d0] + (1) Uridine[d0]	5-NUCLEOTID-RXN.c.araexp.UMP_URIDINE|RXNQT-4150.c	R_R00963_c	R00963_c
rxn00709_c0	(1) ATP[c0] + (1) Uridine[c0] => (1) ADP[c0] + (1) H+[c0] + (1) UMP[c0]	URIDINEKIN-RXN.c	R_R00964_c	R00964_c
rxn00710_c0	(1) H+[c0] + (1) Orotidine 5'-phosphate[c0] => (1) CO2[c0] + (1) UMP[c0]	OROTPDECARB-RXN.c	R_R00965_c	R00965_c
rxn00711_c0	(1) Diphosphate[c0] + (1) H+[c0] + (1) UMP[c0] <= (1) 5-Phospho-alpha-D-ribose 1-diphosphate[c0] + (1) Uracil[c0]	URACIL-PRIBOSYLTRANS-RXN.c	R_R00966_c	R00966_c
rxn00712_c0	(1) UTP[c0] + (1) Uridine[c0] => (1) H+[c0] + (1) UDP[c0] + (1) UMP[c0]		R_R00967_c	R00967_c
rxn00712_d0	(1) UTP[d0] + (1) Uridine[d0] => (1) H+[d0] + (1) UDP[d0] + (1) UMP[d0]		R_R00967_c	R00967_c
rxn00713_c0	(1) GTP[c0] + (1) Uridine[c0] => (1) GDP[c0] + (1) H+[c0] + (1) UMP[c0]	URKI-RXN.c	R_R00968_c	R00968_c
rxn00715_c0	(1) ITP[c0] + (1) Uridine[c0] => (1) H+[c0] + (1) IDP[c0] + (1) UMP[c0]		R_R00970_c	R00970_c
rxn00715_d0	(1) ITP[d0] + (1) Uridine[d0] => (1) H+[d0] + (1) IDP[d0] + (1) UMP[d0]		R_R00970_c	R00970_c
rxn00717_c0	(1) Cytosine[c0] + (1) H+[c0] + (1) H2O[c0] => (1) NH3[c0] + (1) Uracil[c0]	CYTDEAM-RXN.c	R_R00974_c	R00974_c
rxn00720_c0	(1) 5,6-Dihydrouracil[c0] + (1) NADP+[c0] <=> (1) H+[c0] + (1) NADPH[c0] + (1) Uracil[c0]		R_R00978_c	R00978_c
rxn00726_c0	(1) Chorismate[c0] + (1) NH3[c0] => (1) Anthranilate[c0] + (1) H+[c0] + (1) H2O[c0] + (1) Pyruvate[c0]		R_R00985_c	R00985_c
rxn00727_c0	(1) Chorismate[c0] + (1) L-Glutamine[c0] <=> (1) Anthranilate[c0] + (1) H+[c0] + (1) L-Glutamate[c0] + (1) Pyruvate[c0]		R_R00986_c	R00986_c
rxn00735_c0	(1) 2-Oxobutanoate[c0] + (1) CO2[c0] + (1) NADH[c0] <= (1) D-erythro-3-Methylmalate[c0] + (1) NAD+[c0]		R_R00994_c	R00994_c
rxn00737_c0	(1) L-Threonine[c0] => (1) 2-Oxobutanoate[c0] + (1) NH3[c0]	THREDEHYD-RXN.c	R_R00996_c	R00996_c
rxn00738_c0	(1) 1-Aminocyclopropane-1-carboxylate[c0] + (1) H2O[c0] <=> (1) 2-Oxobutanoate[c0] + (1) NH3[c0]	4.1.99.4-RXN.c
rxn00740_c0	(1) H2O[c0] + (1) O-Succinyl-L-homoserine[c0] => (1) 2-Oxobutanoate[c0] + (1) H+[c0] + (1) NH3[c0] + (1) Succinate[c0]	METBALT-RXN.c	R_R00999_c	R00999_c
rxn00741_c0	(1) 2-Hydroxybutanoic acid[c0] + (1) NAD+[c0] <=> (1) 2-Oxobutanoate[c0] + (1) H+[c0] + (1) NADH[c0]		R_R01000_c	R01000_c
rxn00742_c0	(1) H2O[c0] + (1) L-Cystathionine[c0] => (1) 2-Oxobutanoate[c0] + (1) L-Cysteine[c0] + (1) NH3[c0]	CYSTAGLY-RXN.c	R_R01001_c	R01001_c
rxn00744_c0	(1) ATP[c0] + (1) Glycerone[c0] => (1) ADP[c0] + (1) Glycerone phosphate[c0] + (1) H+[c0]	GLYCERONE-KINASE-RXN.c
rxn00747_c0	(1) D-Glyceraldehyde 3-phosphate[c0] <=> (1) Glycerone phosphate[c0]		R_R01015_c	R01015_c
rxn00751_c0	(1) ATP[c0] + (1) Choline[c0] => (1) ADP[c0] + (1) Choline phosphate[c0] + (1) H+[c0]	CHOLINE-KINASE-RXN.c	R_R01021_c	R01021_c
rxn00758_c0	(1) H2O[c0] + (1) sn-glycero-3-Phosphocholine[c0] => (1) Choline[c0] + (1) H+[c0] + (1) sn-Glycerol 3-phosphate[c0]		R_R01030_c	R01030_c
rxn00762_c0	(1) Glycerol[c0] + (1) NAD+[c0] <=> (1) Glycerone[c0] + (1) H+[c0] + (1) NADH[c0]	GLYCDEH-RXN.c
rxn00763_c0	(1) Glycerol[c0] + (1) NAD+[c0] <=> (1) D-Glyceraldehyde[c0] + (1) H+[c0] + (1) NADH[c0]	ALDEHYDE-REDUCTASE-RXN.c.araexp.GLYCERALD_GLYCEROL_NAD_NADH	R_R01036_c	R01036_c
rxn00765_c0	(1) Glycerol[c0] + (1) NADP+[c0] <=> (1) D-Glyceraldehyde[c0] + (1) H+[c0] + (1) NADPH[c0]	ALDEHYDE-REDUCTASE-RXN.c.araexp.GLYCERALD_GLYCEROL_NADP_NADPH		R01041_c
rxn00766_c0	(1) Glycerol 2-phosphate[c0] + (1) H2O[c0] <=> (1) Glycerol[c0] + (1) Orthophosphate[c0]	GLYCEROL-2-PHOSPHATASE-RXN.c
rxn00770_c0	(1) ATP[c0] + (1) D-Ribose 5-phosphate[c0] => (1) 5-Phospho-alpha-D-ribose 1-diphosphate[c0] + (1) AMP[c0] + (1) H+[c0]	PRPPSYN-RXN.c	R_R01049_c	R01049_c
rxn00772_c0	(1) ATP[c0] + (1) D-Ribose[c0] => (1) ADP[c0] + (1) D-Ribose 5-phosphate[c0] + (1) H+[c0]		R_R01051_c	R01051_c
rxn00773_c0	(1) ADP[c0] + (1) D-Ribose 5-phosphate[c0] <= (1) ADP-ribose[c0] + (1) Orthophosphate[c0]	2.7.7.35-RXN.c
rxn00776_c0	(1) D-Ribose 5-phosphate[c0] + (1) Uracil[c0] <=> (1) H2O[c0] + (1) Pseudouridine 5'-phosphate[c0]	PSEUDOURIDYLATE-SYNTHASE-RXN.c|RXN0-5398.c	R_R01055_c	R01055_c
rxn00776_d0	(1) D-Ribose 5-phosphate[d0] + (1) Uracil[d0] <=> (1) H2O[d0] + (1) Pseudouridine 5'-phosphate[d0]	PSEUDOURIDYLATE-SYNTHASE-RXN.c|RXN0-5398.c	R_R01055_c	R01055_c
rxn00776_x0	(1) D-Ribose 5-phosphate[x0] + (1) Uracil[x0] <=> (1) H2O[x0] + (1) Pseudouridine 5'-phosphate[x0]	PSEUDOURIDYLATE-SYNTHASE-RXN.c|RXN0-5398.c	R_R01055_c	R01055_c
rxn00777_c0	(1) D-Ribose 5-phosphate[c0] <=> (1) D-Ribulose 5-phosphate[c0]	RIB5PISOM-RXN.c	R_R01056_c	R01056_c
rxn00779_c0	(1) D-Glyceraldehyde 3-phosphate[c0] + (1) H2O[c0] + (1) NADP+[c0] <=> (1) 3-Phospho-D-glycerate[c0] + (2) H+[c0] + (1) NADPH[c0]	1.2.1.9-RXN.c
rxn00781_c0	(1) D-Glyceraldehyde 3-phosphate[c0] + (1) NAD+[c0] + (1) Orthophosphate[c0] <=> (1) 3-Phospho-D-glyceroyl phosphate[c0] + (1) H+[c0] + (1) NADH[c0]		R_R01061_c	R01061_c
rxn00782_c0	(1) D-Glyceraldehyde 3-phosphate[c0] + (1) NADP+[c0] + (1) Orthophosphate[c0] <=> (1) 3-Phospho-D-glyceroyl phosphate[c0] + (1) H+[c0] + (1) NADPH[c0]
rxn00785_c0	(1) D-Fructose 6-phosphate[c0] + (1) D-Glyceraldehyde 3-phosphate[c0] <=> (1) D-Erythrose 4-phosphate[c0] + (1) D-Xylulose 5-phosphate[c0]
rxn00786_c0	(1) D-Fructose 1,6-bisphosphate[c0] <=> (1) D-Glyceraldehyde 3-phosphate[c0] + (1) Glycerone phosphate[c0]
rxn00786_m0	(1) D-Fructose 1,6-bisphosphate[m0] <=> (1) D-Glyceraldehyde 3-phosphate[m0] + (1) Glycerone phosphate[m0]
rxn00787_c0	(1) D-Tagatose 1,6-bisphosphate[c0] <=> (1) D-Glyceraldehyde 3-phosphate[c0] + (1) Glycerone phosphate[c0]	TAGAALDOL-RXN.c
rxn00789_c0	(1) 1-(5-Phospho-D-ribosyl)-ATP[c0] + (1) Diphosphate[c0] + (1) H+[c0] <= (1) 5-Phospho-alpha-D-ribose 1-diphosphate[c0] + (1) ATP[c0]	ATPPHOSPHORIBOSYLTRANS-RXN.c|RXN-10968.c	R_R01071_c	R01071_c
rxn00790_c0	(1) 5-Phosphoribosylamine[c0] + (1) Diphosphate[c0] + (1) H+[c0] + (1) L-Glutamate[c0] <= (1) 5-Phospho-alpha-D-ribose 1-diphosphate[c0] + (1) H2O[c0] + (1) L-Glutamine[c0]	PRPPAMIDOTRANS-RXN.c	R_R01072_c	R01072_c
rxn00791_c0	(1) Diphosphate[c0] + (1) H+[c0] + (1) N-(5-Phospho-D-ribosyl)anthranilate[c0] <=> (1) 5-Phospho-alpha-D-ribose 1-diphosphate[c0] + (1) Anthranilate[c0]	PRTRANS-RXN.c	R_R01073_c	R01073_c
rxn00799_c0	(1) (S)-Malate[c0] <=> (1) Fumarate[c0] + (1) H2O[c0]
rxn00800_c0	(1) N6-(1,2-Dicarboxyethyl)-AMP[c0] <=> (1) AMP[c0] + (1) Fumarate[c0]	AMPSYN-RXN.c	R_R01083_c	R01083_c
rxn00801_c0	(1) 3-Fumarylpyruvate[c0] + (1) H2O[c0] => (1) Fumarate[c0] + (1) H+[c0] + (1) Pyruvate[c0]
rxn00801_d0	(1) 3-Fumarylpyruvate[d0] + (1) H2O[d0] => (1) Fumarate[d0] + (1) H+[d0] + (1) Pyruvate[d0]
rxn00801_m0	(1) 3-Fumarylpyruvate[m0] + (1) H2O[m0] => (1) Fumarate[m0] + (1) H+[m0] + (1) Pyruvate[m0]
rxn00802_c0	(1) N-(L-Arginino)succinate[c0] <=> (1) Fumarate[c0] + (1) L-Arginine[c0]	ARGSUCCINLYA-RXN.c	R_R01086_c	R01086_c
rxn00803_c0	(1) Maleic acid[c0] <=> (1) Fumarate[c0]	MALEATE-ISOMERASE-RXN.c
rxn00806_c0	(1) 2-Oxoglutarate[c0] + (1) L-Leucine[c0] <=> (1) 4-Methyl-2-oxopentanoate[c0] + (1) L-Glutamate[c0]		R_R01090_c	R01090_c
rxn00816_c0	(1) H2O[c0] + (1) Lactose[c0] <=> (1) D-Galactose[c0] + (1) D-Glucose[c0]
rxn00817_c0	(1) H2O[c0] + (1) Melibiose[c0] => (1) D-Galactose[c0] + (1) D-Glucose[c0]		R_R01101_c
rxn00821_c0	(1) Dehydroascorbate[c0] + (2) Glutathione[c0] <=> (1) Ascorbate[c0] + (1) Glutathione disulfide[c0]	1.8.5.1-RXN.c
rxn00821_x0	(1) Dehydroascorbate[x0] + (2) Glutathione[x0] <=> (1) Ascorbate[x0] + (1) Glutathione disulfide[x0]	1.8.5.1-RXN.c
rxn00829_c0	(1) (R)-5-Diphosphomevalonate[c0] + (1) ATP[c0] => (1) ADP[c0] + (1) CO2[c0] + (1) Isopentenyl diphosphate[c0] + (1) Orthophosphate[c0]	DIPHOSPHOMEVALONTE-DECARBOXYLASE-RXN.c	R_R01121_c	R01121_c
rxn00829_x0	(1) (R)-5-Diphosphomevalonate[x0] + (1) ATP[x0] => (1) ADP[x0] + (1) CO2[x0] + (1) Isopentenyl diphosphate[x0] + (1) Orthophosphate[x0]	DIPHOSPHOMEVALONTE-DECARBOXYLASE-RXN.c	R_R01121_c	R01121_c
rxn00830_c0	(1) Isopentenyl diphosphate[c0] <=> (1) Dimethylallyl diphosphate[c0]	IPPISOM-RXN.c	R_R01123_c	R01123_c
rxn00830_m0	(1) Isopentenyl diphosphate[m0] <=> (1) Dimethylallyl diphosphate[m0]	IPPISOM-RXN.c	R_R01123_c	R01123_c
rxn00831_c0	(1) H2O[c0] + (1) IMP[c0] <=> (1) Inosine[c0] + (1) Orthophosphate[c0]	5-NUCLEOTID-RXN.c.araexp.IMP_INOSINE|RXN-7607.c	R_R01126_c	R01126_c
rxn00831_d0	(1) H2O[d0] + (1) IMP[d0] <=> (1) Inosine[d0] + (1) Orthophosphate[d0]	5-NUCLEOTID-RXN.c.araexp.IMP_INOSINE|RXN-7607.c	R_R01126_c	R01126_c
rxn00832_c0	(1) H2O[c0] + (1) IMP[c0] <=> (1) 1-(5'-Phosphoribosyl)-5-formamido-4-imidazolecarboxamide[c0]	IMPCYCLOHYDROLASE-RXN.c	R_R01127_c	R01127_c
rxn00834_c0	(1) H2O[c0] + (1) IMP[c0] + (1) NAD+[c0] <=> (1) H+[c0] + (1) NADH[c0] + (1) Xanthosine 5'-phosphate[c0]	IMP-DEHYDROG-RXN.c	R_R01130_c	R01130_c
rxn00836_c0	(1) Diphosphate[c0] + (1) H+[c0] + (1) IMP[c0] <= (1) 5-Phospho-alpha-D-ribose 1-diphosphate[c0] + (1) Hypoxanthine[c0]	HYPOXANPRIBOSYLTRAN-RXN.c	R_R01132_c	R01132_c
rxn00838_c0	(1) GTP[c0] + (1) IMP[c0] + (1) L-Aspartate[c0] => (1) GDP[c0] + (2) H+[c0] + (1) N6-(1,2-Dicarboxyethyl)-AMP[c0] + (1) Orthophosphate[c0]	ADENYLOSUCCINATE-SYNTHASE-RXN.c	R_R01135_c	R01135_c
rxn00839_c0	(1) ATP[c0] + (1) dADP[c0] <=> (1) ADP[c0] + (1) dATP[c0]	DADPKIN-RXN.c	R_R01137_c	R01137_c
rxn00839_x0	(1) ATP[x0] + (1) dADP[x0] <=> (1) ADP[x0] + (1) dATP[x0]	DADPKIN-RXN.c	R_R01137_c	R01137_c
rxn00840_c0	(1) Pyruvate[c0] + (1) dATP[c0] <=> (1) H+[c0] + (1) Phosphoenolpyruvate[c0] + (1) dADP[c0]			R01138_c
rxn00848_c0	(1) Pyridoxamine phosphate[c0] + (1) Pyruvate[c0] <=> (1) D-Alanine[c0] + (1) Pyridoxal phosphate[c0]	RXN0-5240.c
rxn00849_c0	(1) 2-Oxoglutarate[c0] + (1) D-Alanine[c0] <=> (1) D-Glutamate[c0] + (1) Pyruvate[c0]	D-ALANINE-AMINOTRANSFERASE-RXN.c
rxn00851_c0	(1) ATP[c0] + (2) D-Alanine[c0] => (1) ADP[c0] + (1) D-Alanyl-D-alanine[c0] + (1) H+[c0] + (1) Orthophosphate[c0]	DALADALALIG-RXN.c
rxn00852_c0	(1) H2O[c0] + (1) Oxygen[c0] + (1) Putrescine[c0] => (1) 4-Aminobutyraldehyde[c0] + (1) Hydrogen peroxide[c0] + (1) NH3[c0]	PUTRESCINE-OXIDASE-RXN.c	R_R01151_c	R01151_c
rxn00853_c0	(2) H+[c0] + (1) H2O[c0] + (1) N-Carbamoylputrescine[c0] => (1) CO2[c0] + (1) NH3[c0] + (1) Putrescine[c0]	N-CARBAMOYLPUTRESCINE-AMIDASE-RXN.c
rxn00858_c0	(1) Agmatine[c0] + (1) H2O[c0] => (1) Putrescine[c0] + (1) Urea[c0]	AGMATIN-RXN.c
rxn00859_c0	(1) H2O[c0] + (1) L-Histidinol[c0] + (2) NAD+[c0] <=> (3) H+[c0] + (1) L-Histidine[c0] + (2) NADH[c0]	RXN-8001.c
rxn00860_c0	(1) L-Histidine[c0] + (1) S-Adenosyl-L-methionine[c0] <=> (1) H+[c0] + (1) N(pi)-Methyl-L-histidine[c0] + (1) S-Adenosyl-L-homocysteine[c0]		R_R01159_c	R01159_c
rxn00860_d0	(1) L-Histidine[d0] + (1) S-Adenosyl-L-methionine[d0] <=> (1) H+[d0] + (1) N(pi)-Methyl-L-histidine[d0] + (1) S-Adenosyl-L-homocysteine[d0]		R_R01159_c	R01159_c
rxn00860_m0	(1) L-Histidine[m0] + (1) S-Adenosyl-L-methionine[m0] <=> (1) H+[m0] + (1) N(pi)-Methyl-L-histidine[m0] + (1) S-Adenosyl-L-homocysteine[m0]		R_R01159_c	R01159_c
rxn00860_n0	(1) L-Histidine[n0] + (1) S-Adenosyl-L-methionine[n0] <=> (1) H+[n0] + (1) N(pi)-Methyl-L-histidine[n0] + (1) S-Adenosyl-L-homocysteine[n0]		R_R01159_c	R01159_c
rxn00863_c0	(1) H2O[c0] + (1) L-Histidinal[c0] + (1) NAD+[c0] <=> (2) H+[c0] + (1) L-Histidine[c0] + (1) NADH[c0]	HISTALDEHYD-RXN.c
rxn00866_c0	(1) H+[c0] + (1) L-Histidine[c0] => (1) CO2[c0] + (1) Histamine[c0]	HISTIDINE-DECARBOXYLASE-RXN.c	R_R01167_c	R01167_c
rxn00872_c0	(1) Butanoyl-CoA[c0] + (1) FAD[c0] + (1) H+[c0] <=> (1) Crotonoyl-CoA[c0] + (1) FADH2[c0]
rxn00874_c0	(1) Acetyl-CoA[c0] + (1) Butanoyl-CoA[c0] <=> (1) 3-Oxohexanoyl-CoA[c0] + (1) CoA[c0]	RXN-12565.c
rxn00875_c0	(1) Acetate[c0] + (1) Butanoyl-CoA[c0] <= (1) Acetyl-CoA[c0] + (1) Butanoic acid[c0]
rxn00881_c0	(1) H2O[c0] + (1) Inositol 1-phosphate[c0] <=> (1) Orthophosphate[c0] + (1) myo-Inositol[c0]		R_R01185_c	R01185_c
rxn00882_c0	(1) H2O[c0] + (1) myo-Inositol 4-phosphate[c0] <=> (1) Orthophosphate[c0] + (1) myo-Inositol[c0]	RXN-10952.c	R_R01186_c	R01186_c
rxn00883_c0	(1) 1D-myo-Inositol 3-phosphate[c0] + (1) H2O[c0] <=> (1) Orthophosphate[c0] + (1) myo-Inositol[c0]		R_R01187_c	R01187_c
rxn00888_c0	(1) UDP-D-galactose[c0] + (1) myo-Inositol[c0] <=> (1) UDP[c0] + (1) alpha-D-Galactosyl-(1->3)-1D-myo-inositol[c0]	2.4.1.123-RXN.c
rxn00898_c0	(1) 2,3-Dihydroxy-3-methylbutanoate[c0] => (1) 3-Methyl-2-oxobutanoic acid[c0] + (1) H2O[c0]		R_R01209_c	R01209_c
rxn00902_c0	(1) CoA[c0] + (1) H+[c0] + (1) alpha-Isopropylmalate[c0] <= (1) 3-Methyl-2-oxobutanoic acid[c0] + (1) Acetyl-CoA[c0] + (1) H2O[c0]		R_R01213_c	R01213_c
rxn00903_c0	(1) 2-Oxoglutarate[c0] + (1) L-Valine[c0] <=> (1) 3-Methyl-2-oxobutanoic acid[c0] + (1) L-Glutamate[c0]		R_R01214_c	R01214_c
rxn00907_c0	(1) 5,10-Methylenetetrahydrofolate[c0] + (1) NADP+[c0] <=> (1) 5,10-Methenyltetrahydrofolate[c0] + (1) NADPH[c0]	METHYLENETHFDEHYDROG-NADP-RXN.c	R_R01220_c	R01220_c
rxn00908_c0	(1) Glycine[c0] + (1) NAD+[c0] + (1) Tetrahydrofolate[c0] => (1) 5,10-Methylenetetrahydrofolate[c0] + (1) CO2[c0] + (1) NADH[c0] + (1) NH3[c0]		R_R01221_c	R01221_c
rxn00910_c0	(1) 5-Methyltetrahydrofolate[c0] + (1) NADP+[c0] <=> (1) 5,10-Methylenetetrahydrofolate[c0] + (1) H+[c0] + (1) NADPH[c0]		R_R01224_c	R01224_c
rxn00912_c0	(1) 3-Methyl-2-oxobutanoic acid[c0] + (1) 5,10-Methylenetetrahydrofolate[c0] + (1) H2O[c0] <=> (1) 2-Dehydropantoate[c0] + (1) Tetrahydrofolate[c0]	3-CH3-2-OXOBUTANOATE-OH-CH3-XFER-RXN.c	R_R01226_c	R01226_c
rxn00913_c0	(1) GMP[c0] + (1) H2O[c0] <=> (1) Guanosine[c0] + (1) Orthophosphate[c0]	5-NUCLEOTID-RXN.c.araexp.GMP_GUANOSINE|RXN-7609.c	R_R01227_c	R01227_c
rxn00913_d0	(1) GMP[d0] + (1) H2O[d0] <=> (1) Guanosine[d0] + (1) Orthophosphate[d0]	5-NUCLEOTID-RXN.c.araexp.GMP_GUANOSINE|RXN-7609.c	R_R01227_c	R01227_c
rxn00914_c0	(1) ATP[c0] + (1) Guanosine[c0] => (1) ADP[c0] + (1) GMP[c0] + (1) H+[c0]	GUANOSINEKIN-RXN.c
rxn00915_c0	(1) Diphosphate[c0] + (1) GMP[c0] + (1) H+[c0] <= (1) 5-Phospho-alpha-D-ribose 1-diphosphate[c0] + (1) Guanine[c0]	GUANPRIBOSYLTRAN-RXN.c	R_R01229_c	R01229_c
rxn00916_c0	(1) ATP[c0] + (1) NH3[c0] + (1) Xanthosine 5'-phosphate[c0] => (1) AMP[c0] + (1) Diphosphate[c0] + (1) GMP[c0] + (3) H+[c0]	GMP-SYN-NH3-RXN.c	R_R01230_c	R01230_c
rxn00917_c0	(1) ATP[c0] + (1) H2O[c0] + (1) L-Glutamine[c0] + (1) Xanthosine 5'-phosphate[c0] => (1) AMP[c0] + (1) Diphosphate[c0] + (1) GMP[c0] + (3) H+[c0] + (1) L-Glutamate[c0]	GMP-SYN-GLUT-RXN.c	R_R01231_c	R01231_c
rxn00918_c0	(1) H2O[c0] + (1) P1,P4-Bis(5'-guanosyl) tetraphosphate[c0] => (1) GMP[c0] + (1) GTP[c0] + (1) H+[c0]	3.6.1.17-RXN.c	R_R01232_c	R01232_c
rxn00918_d0	(1) H2O[d0] + (1) P1,P4-Bis(5'-guanosyl) tetraphosphate[d0] => (1) GMP[d0] + (1) GTP[d0] + (1) H+[d0]	3.6.1.17-RXN.c	R_R01232_c	R01232_c
rxn00920_c0	(1) 3',5'-Cyclic GMP[c0] + (1) H2O[c0] => (1) GMP[c0] + (1) H+[c0]		R_R01234_c	R01234_c
rxn00929_c0	(1) L-Proline[c0] + (1) NAD+[c0] <=> (1) (S)-1-Pyrroline-5-carboxylate[c0] + (2) H+[c0] + (1) NADH[c0]	PYRROLINECARBREDUCT-RXN.c.araexp.NAD_NADH	R_R01248_c	R01248_c
rxn00931_c0	(1) L-Proline[c0] + (1) NADP+[c0] <=> (1) (S)-1-Pyrroline-5-carboxylate[c0] + (2) H+[c0] + (1) NADPH[c0]	PYRROLINECARBREDUCT-RXN.c.araexp.NADP_NADPH		R01251_c
rxn00932_c0	(1) 2-Oxoglutarate[c0] + (1) L-Proline[c0] + (1) Oxygen[c0] => (1) CO2[c0] + (1) Hydroxyproline[c0] + (1) Succinate[c0]	RXN490-3641.c	R_R01252_c	R01252_c
rxn00932_g0	(1) 2-Oxoglutarate[g0] + (1) L-Proline[g0] + (1) Oxygen[g0] => (1) CO2[g0] + (1) Hydroxyproline[g0] + (1) Succinate[g0]	RXN490-3641.c	R_R01252_c	R01252_c
rxn00937_c0	(1) L-Asparagine[c0] <=> (1) 3-Cyano-L-alanine[c0] + (1) H2O[c0]	3-CYANOALANINE-HYDRATASE-RXN.c
rxn00937_n0	(1) L-Asparagine[n0] <=> (1) 3-Cyano-L-alanine[n0] + (1) H2O[n0]	3-CYANOALANINE-HYDRATASE-RXN.c
rxn00938_c0	(1) H2O[c0] + (1) Nicotinamide[c0] => (1) NH3[c0] + (1) Nicotinate[c0]	NICOTINAMID-RXN.c|R314-RXN.c
rxn00938_n0	(1) H2O[n0] + (1) Nicotinamide[n0] => (1) NH3[n0] + (1) Nicotinate[n0]	NICOTINAMID-RXN.c|R314-RXN.c
rxn00940_c0	(1) H2O[c0] + (1) Nicotinamide D-ribonucleotide[c0] => (1) D-Ribose 5-phosphate[c0] + (1) H+[c0] + (1) Nicotinamide[c0]	NMNNUCLEOSID-RXN.c
rxn00943_c0	(1) H2O[c0] + (1) Palmitoyl-CoA[c0] => (1) CoA[c0] + (1) H+[c0] + (1) Hexadecanoic acid[c0]	PALMITOYL-COA-HYDROLASE-RXN.c
rxn00944_c0	(1) CoA[c0] + (1) Hexadecanal[c0] + (1) NAD+[c0] => (1) H+[c0] + (1) NADH[c0] + (1) Palmitoyl-CoA[c0]
rxn00945_c0	(1) NADP+[c0] + (1) Palmitoyl-CoA[c0] <= (1) H+[c0] + (1) NADPH[c0] + (1) trans-Hexadec-2-enoyl-CoA[c0]
rxn00946_c0	(1) FAD[c0] + (1) H+[c0] + (1) Palmitoyl-CoA[c0] <=> (1) FADH2[c0] + (1) trans-Hexadec-2-enoyl-CoA[c0]
rxn00947_c0	(1) ATP[c0] + (1) CoA[c0] + (1) Hexadecanoic acid[c0] => (1) AMP[c0] + (1) Diphosphate[c0] + (1) H+[c0] + (1) Palmitoyl-CoA[c0]	RXN-7904.c.araexp.PALMITATE_PALMITYL-COA|RXN-9623.c
rxn00948_c0	(1) H+[c0] + (1) L-Serine[c0] + (1) Palmitoyl-CoA[c0] => (1) 3-Dehydrosphinganine[c0] + (1) CO2[c0] + (1) CoA[c0]		R_R01281_c	R01281_c
rxn00950_c0	(1) Cystathionine[c0] + (1) H2O[c0] => (1) L-Homocysteine[c0] + (1) NH3[c0] + (1) Pyruvate[c0]
rxn00955_c0	(1) H2O[c0] + (1) S-Ribosyl-L-homocysteine[c0] => (1) D-Ribose[c0] + (1) L-Homocysteine[c0]
rxn00957_c0	(1) 4-Hydroxybenzaldehyde[c0] + (1) H2O[c0] + (1) NAD+[c0] => (1) 4-Hydroxybenzoate[c0] + (2) H+[c0] + (1) NADH[c0]
rxn00965_c0	(1) 4-Hydroxybenzoyl-CoA[c0] + (1) H2O[c0] <=> (1) 4-Hydroxybenzoate[c0] + (1) CoA[c0] + (1) H+[c0]	3.1.2.23-RXN.c
rxn00974_c0	(1) Citrate[c0] <=> (1) H2O[c0] + (1) cis-Aconitate[c0]	ACONITATEDEHYDR-RXN.c
rxn00979_c0	(1) Glycolaldehyde[c0] + (1) H2O[c0] + (1) NAD+[c0] <=> (1) Glycolate[c0] + (2) H+[c0] + (1) NADH[c0]	GLYCOLALD-DEHYDROG-RXN.c
rxn00980_c0	(1) 2-Phosphoglycolate[c0] + (1) H2O[c0] <=> (1) Glycolate[c0] + (1) Orthophosphate[c0]
rxn00980_n0	(1) 2-Phosphoglycolate[n0] + (1) H2O[n0] <=> (1) Glycolate[n0] + (1) Orthophosphate[n0]
rxn00986_c0	(1) ATP[c0] + (1) Propanoate[c0] => (1) Diphosphate[c0] + (1) Propionyladenylate[c0]			R01354_c
rxn00987_c0	(1) (2R,3S)-2,3-Dimethylmalate[c0] <=> (1) Propanoate[c0] + (1) Pyruvate[c0]	23-DIMETHYLMALATE-LYASE-RXN.c
rxn00987_d0	(1) (2R,3S)-2,3-Dimethylmalate[d0] <=> (1) Propanoate[d0] + (1) Pyruvate[d0]	23-DIMETHYLMALATE-LYASE-RXN.c
rxn00991_c0	(1) (S)-3-Hydroxy-3-methylglutaryl-CoA[c0] <=> (1) Acetoacetate[c0] + (1) Acetyl-CoA[c0]		R_R01360_c	R01360_c
rxn00992_c0	(1) (R)-3-Hydroxybutanoate[c0] + (1) NAD+[c0] <=> (1) Acetoacetate[c0] + (1) H+[c0] + (1) NADH[c0]	3-HYDROXYBUTYRATE-DEHYDROGENASE-RXN.c
rxn00993_c0	(1) Acetoacetate[c0] + (1) Fumarate[c0] + (1) H+[c0] <= (1) 4-Fumarylacetoacetate[c0] + (1) H2O[c0]	FUMARYLACETOACETASE-RXN.c	R_R01364_c	R01364_c
rxn00995_c0	(1) Acetoacetate[c0] + (1) H+[c0] => (1) Acetone[c0] + (1) CO2[c0]	ACETOACETATE-DECARBOXYLASE-RXN.c
rxn00999_c0	(1) Oxygen[c0] + (1) Phenylpyruvate[c0] => (1) 2-Hydroxyphenylacetate[c0] + (1) CO2[c0]	RXN-10815.c	R_R01372_c	R01372_c
rxn01000_c0	(1) H+[c0] + (1) Prephenate[c0] => (1) CO2[c0] + (1) H2O[c0] + (1) Phenylpyruvate[c0]		R_R01373N_c|R_R01373_c	R01373_c
rxn01003_c0	(1) H+[c0] + (1) Phenylpyruvate[c0] <=> (1) CO2[c0] + (1) Phenylacetaldehyde[c0]	PHENYLPYRUVATE-DECARBOXYLASE-RXN.c
rxn01004_c0	(1) Phenylpyruvate[c0] <=> (1) 2-Hydroxy-3-phenylpropenoate[c0]	PHENYLPYRUVATE-TAUTOMERASE-RXN.c
rxn01005_c0	(1) D-Glucuronate 1-phosphate[c0] + (1) UTP[c0] <=> (1) Diphosphate[c0] + (1) UDP-glucuronate[c0]	2.7.7.44-RXN.c
rxn01007_c0	(1) H+[c0] + (1) UDP-glucuronate[c0] <=> (1) CO2[c0] + (1) UDP-D-xylose[c0]	UDP-GLUCURONATE-DECARBOXYLASE-RXN.c	R_R01384_c	R01384_c
rxn01008_c0	(1) UDP-glucuronate[c0] <=> (1) UDP-D-galacturonate[c0]	UDP-GLUCURONATE-4-EPIMERASE-RXN.c
rxn01009_c0	(1) H+[c0] + (1) UDP-glucuronate[c0] => (1) CO2[c0] + (1) UDP-apiose[c0]	RXN-7770.c
rxn01011_c0	(1) D-Glycerate[c0] + (1) NAD+[c0] <=> (1) H+[c0] + (1) Hydroxypyruvate[c0] + (1) NADH[c0]	HYDROXYPYRUVATE-REDUCTASE-RXN.c.araexp.NAD_NADH
rxn01013_c0	(1) D-Glycerate[c0] + (1) NADP+[c0] <=> (1) H+[c0] + (1) Hydroxypyruvate[c0] + (1) NADPH[c0]	HYDROXYPYRUVATE-REDUCTASE-RXN.c.araexp.NADP_NADPH|RXN0-300.c
rxn01013_d0	(1) D-Glycerate[d0] + (1) NADP+[d0] <=> (1) H+[d0] + (1) Hydroxypyruvate[d0] + (1) NADPH[d0]	HYDROXYPYRUVATE-REDUCTASE-RXN.c.araexp.NADP_NADPH|RXN0-300.c
rxn01018_c0	(1) Carbamoyl phosphate[c0] + (1) L-Aspartate[c0] <=> (1) H+[c0] + (1) N-Carbamoyl-L-aspartate[c0] + (1) Orthophosphate[c0]	ASPCARBTRANS-RXN.c	R_R01397_c	R01397_c
rxn01019_c0	(1) Carbamoyl phosphate[c0] + (1) L-Ornithine[c0] <=> (1) H+[c0] + (1) L-Citrulline[c0] + (1) Orthophosphate[c0]	ORNCARBAMTRANSFER-RXN.c	R_R01398_c	R01398_c
rxn01021_c0	(1) 5'-Methylthioadenosine[c0] + (1) H2O[c0] <=> (1) 5-Methylthio-D-ribose[c0] + (1) Adenine[c0]	METHYLTHIOADENOSINE-NUCLEOSIDASE-RXN.c
rxn01023_c0	(1) Formamide[c0] <= (1) H2O[c0] + (1) Hydrogen cyanide[c0]
rxn01028_c0	(1) 5,6-Dihydrothymine[c0] + (1) NADP+[c0] <=> (1) H+[c0] + (1) NADPH[c0] + (1) Thymine[c0]	RXN-11209.c	R_R01415_c	R01415_c
rxn01029_c0	(1) Agmatine[c0] + (1) H2O[c0] => (1) N-Carbamoylputrescine[c0] + (1) NH3[c0]	AGMATINE-DEIMINASE-RXN.c
rxn01032_c0	(1) Aromatic aldehyde[c0] + (1) H2O[c0] + (1) NAD+[c0] <=> (1) Benzoate[c0] + (2) H+[c0] + (1) NADH[c0]	BENZALDEHYDE-DEHYDROGENASE-NAD+-RXN.c
rxn01033_c0	(1) Aromatic aldehyde[c0] + (1) H2O[c0] + (1) NADP+[c0] <=> (1) Benzoate[c0] + (2) H+[c0] + (1) NADPH[c0]	BENZALDEHYDE-DEHYDROGENASE-NADP+-RXN.c
rxn01034_c0	(1) Benzoyl phosphate[c0] + (1) H2O[c0] => (1) Benzoate[c0] + (1) H+[c0] + (1) Orthophosphate[c0]
rxn01034_d0	(1) Benzoyl phosphate[d0] + (1) H2O[d0] => (1) Benzoate[d0] + (1) H+[d0] + (1) Orthophosphate[d0]
rxn01035_c0	(1) ATP[c0] + (1) Benzoate[c0] + (1) CoA[c0] => (1) AMP[c0] + (1) Diphosphate[c0] + (1) H+[c0] + (1) S-Benzoate coenzyme A[c0]	BENZOATE--COA-LIGASE-RXN.c
rxn01035_d0	(1) ATP[d0] + (1) Benzoate[d0] + (1) CoA[d0] => (1) AMP[d0] + (1) Diphosphate[d0] + (1) H+[d0] + (1) S-Benzoate coenzyme A[d0]	BENZOATE--COA-LIGASE-RXN.c
rxn01035_m0	(1) ATP[m0] + (1) Benzoate[m0] + (1) CoA[m0] => (1) AMP[m0] + (1) Diphosphate[m0] + (1) H+[m0] + (1) S-Benzoate coenzyme A[m0]	BENZOATE--COA-LIGASE-RXN.c
rxn01035_x0	(1) ATP[x0] + (1) Benzoate[x0] + (1) CoA[x0] => (1) AMP[x0] + (1) Diphosphate[x0] + (1) H+[x0] + (1) S-Benzoate coenzyme A[x0]	BENZOATE--COA-LIGASE-RXN.c
rxn01053_c0	(1) (S)-Lactaldehyde[c0] + (1) H2O[c0] + (1) NAD+[c0] <=> (1) (S)-Lactate[c0] + (2) H+[c0] + (1) NADH[c0]	LACTALDDEHYDROG-RXN.c
rxn01058_c0	(1) Cholesterol[c0] + (1) NAD+[c0] <=> (1) 7-Dehydrocholesterol[c0] + (1) H+[c0] + (1) NADH[c0]		R_R01451_c	R01451_c
rxn01058_w0	(1) Cholesterol[w0] + (1) NAD+[w0] <=> (1) 7-Dehydrocholesterol[w0] + (1) H+[w0] + (1) NADH[w0]		R_R01451_c	R01451_c
rxn01062_c0	(1) Cholesterol[c0] + (1) NADP+[c0] <=> (1) 7-Dehydrocholesterol[c0] + (1) H+[c0] + (1) NADPH[c0]	RXN66-323.c		R01456_c
rxn01062_w0	(1) Cholesterol[w0] + (1) NADP+[w0] <=> (1) 7-Dehydrocholesterol[w0] + (1) H+[w0] + (1) NADPH[w0]	RXN66-323.c		R01456_c
rxn01063_c0	(1) Cholesterol[c0] + (1) NADP+[c0] <= (1) Desmosterol[c0] + (1) H+[c0] + (1) NADPH[c0]	RXN66-28.c	R_R01457_c	R01457_c
rxn01063_w0	(1) Cholesterol[w0] + (1) NADP+[w0] <= (1) Desmosterol[w0] + (1) H+[w0] + (1) NADPH[w0]	RXN66-28.c	R_R01457_c	R01457_c
rxn01066_c0	(1) Cholesterol ester[c0] + (1) H2O[c0] <=> (1) Cholesterol[c0] + (1) Fatty acid[c0]
rxn01069_c0	(1) H2O[c0] + (1) O-Phospho-L-homoserine[c0] <=> (1) L-Threonine[c0] + (1) Orthophosphate[c0]	THRESYN-RXN.c	R_R01466_c	R01466_c
rxn01071_c0	(1) ATP[c0] + (1) Ethanolamine[c0] => (1) ADP[c0] + (1) Ethanolamine phosphate[c0] + (1) H+[c0]	ETHANOLAMINE-KINASE-RXN.c	R_R01468_c	R01468_c
rxn01073_c0	(1) H2O[c0] + (1) sn-glycero-3-Phosphoethanolamine[c0] => (1) Ethanolamine[c0] + (1) H+[c0] + (1) sn-Glycerol 3-phosphate[c0]		R_R01470_c	R01470_c
rxn01074_c0	(1) UTP[c0] + (1) alpha-D-Xylose 1-phosphate[c0] <=> (1) Diphosphate[c0] + (1) UDP-D-xylose[c0]	2.7.7.11-RXN.c|2.7.7.64-RXN.c.araexp.CPD-490_UDP-D-XYLOSE
rxn01075_c0	(1) UDP-L-arabinose[c0] <=> (1) UDP-D-xylose[c0]	UDP-ARABINOSE-4-EPIMERASE-RXN.c.araexp.CPD-12513
rxn01081_c0	(1) D-Glucuronolactone[c0] + (1) H2O[c0] <= (1) D-Glucuronate[c0] + (1) H+[c0]
rxn01087_c0	(1) ATP[c0] + (1) H+[c0] + (1) N-Acylsphingosine[c0] <=> (1) ADP[c0] + (1) Ceramide 1-phosphate[c0]		R_R01495_c	R01495_c
rxn01099_c0	(1) 3-Phospho-D-glycerate[c0] + (1) H2O[c0] <=> (1) D-Glycerate[c0] + (1) Orthophosphate[c0]	3-PHOSPHOGLYCERATE-PHOSPHATASE-RXN.c
rxn01100_c0	(1) 3-Phospho-D-glycerate[c0] + (1) ATP[c0] <=> (1) 3-Phospho-D-glyceroyl phosphate[c0] + (1) ADP[c0]	PHOSGLYPHOS-RXN.c	R_R01512_c	R01512_c
rxn01101_c0	(1) 3-Phospho-D-glycerate[c0] + (1) NAD+[c0] <=> (1) 3-Phosphonooxypyruvate[c0] + (1) H+[c0] + (1) NADH[c0]	PGLYCDEHYDROG-RXN.c	R_R01513_c	R01513_c
rxn01102_c0	(1) ATP[c0] + (1) D-Glycerate[c0] => (1) 3-Phospho-D-glycerate[c0] + (1) ADP[c0] + (1) H+[c0]	GLY3KIN-RXN.c
rxn01103_c0	(1) 3-Phospho-D-glyceroyl phosphate[c0] + (1) H2O[c0] => (1) 3-Phospho-D-glycerate[c0] + (1) H+[c0] + (1) Orthophosphate[c0]
rxn01104_c0	(1) 2,3-Bisphospho-D-glycerate[c0] + (1) H2O[c0] => (1) 3-Phospho-D-glycerate[c0] + (1) Orthophosphate[c0]
rxn01106_c0	(1) 2-Phospho-D-glycerate[c0] <=> (1) 3-Phospho-D-glycerate[c0]	3PGAREARR-RXN.c	R_R01518_c	R01518_c
rxn01108_c0	(1) NAD+[c0] + (1) beta-D-Glucose[c0] <=> (1) D-Glucono-1,5-lactone[c0] + (1) H+[c0] + (1) NADH[c0]	GLUCOSE-1-DEHYDROGENASE-RXN.c.araexp.NAD_NADH
rxn01109_c0	(1) NADP+[c0] + (1) beta-D-Glucose[c0] <=> (1) D-Glucono-1,5-lactone[c0] + (1) H+[c0] + (1) NADPH[c0]	GLUCOSE-1-DEHYDROGENASE-RXN.c.araexp.NADP_NADPH
rxn01111_c0	(1) ATP[c0] + (1) D-Ribulose 5-phosphate[c0] => (1) ADP[c0] + (1) D-Ribulose 1,5-bisphosphate[c0] + (1) H+[c0]	PHOSPHORIBULOKINASE-RXN.c	R_R01523_c	R01523_c
rxn01115_c0	(1) 6-Phospho-D-gluconate[c0] + (1) NADP+[c0] => (1) CO2[c0] + (1) D-Ribulose 5-phosphate[c0] + (1) NADPH[c0]	6PGLUCONDEHYDROG-RXN.c.araexp.NADP_NADPH|RXN-9952.c	R_R01528_c	R01528_c
rxn01116_c0	(1) D-Ribulose 5-phosphate[c0] <=> (1) D-Xylulose 5-phosphate[c0]	RIBULP3EPIM-RXN.c	R_R01529_c	R01529_c
rxn01117_c0	(1) D-Arabinose 5-phosphate[c0] <=> (1) D-Ribulose 5-phosphate[c0]	DARAB5PISOM-RXN.c
rxn01127_c0	(1) ATP[c0] + (1) H+[c0] + (1) dAMP[c0] <=> (1) ADP[c0] + (1) dADP[c0]		R_R01547_c	R01547_c
rxn01128_c0	(1) Cytidine[c0] + (1) dATP[c0] => (1) CMP[c0] + (1) H+[c0] + (1) dADP[c0]		R_R01548_c	R01548_c
rxn01128_d0	(1) Cytidine[d0] + (1) dATP[d0] => (1) CMP[d0] + (1) H+[d0] + (1) dADP[d0]		R_R01548_c	R01548_c
rxn01129_c0	(1) Uridine[c0] + (1) dATP[c0] => (1) H+[c0] + (1) UMP[c0] + (1) dADP[c0]		R_R01549_c	R01549_c
rxn01129_d0	(1) Uridine[d0] + (1) dATP[d0] => (1) H+[d0] + (1) UMP[d0] + (1) dADP[d0]		R_R01549_c	R01549_c
rxn01134_c0	(1) Maltose[c0] <= (1) alpha,alpha-Trehalose[c0]
rxn01137_c0	(1) Adenosine[c0] + (1) H+[c0] + (1) H2O[c0] => (1) Inosine[c0] + (1) NH3[c0]	ADENODEAMIN-RXN.c	R_R01560_c	R01560_c
rxn01138_c0	(1) Adenosine[c0] + (1) Orthophosphate[c0] <=> (1) Adenine[c0] + (1) alpha-D-Ribose 1-phosphate[c0]	ADENPHOSPHOR-RXN.c	R_R01561_c	R01561_c
rxn01143_c0	(1) ATP[c0] + (1) Thymidine[c0] => (1) ADP[c0] + (1) H+[c0] + (1) dTMP[c0]	THYKI-RXN.c	R_R01567_c	R01567_c
rxn01145_c0	(1) H2O[c0] + (1) dTMP[c0] <=> (1) Orthophosphate[c0] + (1) Thymidine[c0]		R_R01569_c	R01569_c
rxn01156_c0	(1) 2-Oxoglutarate[c0] + (1) D-Phenylalanine[c0] => (1) D-Glutamate[c0] + (1) Phenylpyruvate[c0]
rxn01167_c0	(1) Arachidonate[c0] + (1) Oxygen[c0] => (1) 12(S)-HPETE[c0]	ARACHIDONATE-12-LIPOXYGENASE-RXN.c
rxn01167_d0	(1) Arachidonate[d0] + (1) Oxygen[d0] => (1) 12(S)-HPETE[d0]	ARACHIDONATE-12-LIPOXYGENASE-RXN.c
rxn01168_c0	(1) ATP[c0] + (1) Arachidonate[c0] + (1) CoA[c0] => (1) AMP[c0] + (1) Arachidonyl-CoA[c0] + (1) Diphosphate[c0] + (1) H+[c0]	ARACHIDONATE--COA-LIGASE-RXN.c
rxn01169_c0	(1) ATP[c0] + (1) beta-D-Glucose[c0] => (1) ADP[c0] + (1) H+[c0] + (1) beta-D-Glucose 6-phosphate[c0]	GLUCOKIN-RXN.c|R81-RXN.c	R_R01600_c	R01600_c
rxn01171_c0	(1) alpha-D-Glucose[c0] <=> (1) beta-D-Glucose[c0]	ALDOSE-1-EPIMERASE-RXN.c	R_R01602_c	R01602_c
rxn01174_c0	(1) 3-Hydroxypropanoate[c0] + (1) NAD+[c0] <=> (1) 3-Oxopropanoate[c0] + (1) H+[c0] + (1) NADH[c0]	3-HYDROXYPROPIONATE-DEHYDROGENASE-RXN.c
rxn01179_c0	(3) H+[c0] + (3) Malonyl-CoA[c0] + (1) p-Coumaroyl-CoA[c0] => (3) CO2[c0] + (4) CoA[c0] + (1) Naringenin chalcone[c0]	NARINGENIN-CHALCONE-SYNTHASE-RXN.c	R_R01613_c	R01613_c
rxn01179_n0	(3) H+[n0] + (3) Malonyl-CoA[n0] + (1) p-Coumaroyl-CoA[n0] => (3) CO2[n0] + (4) CoA[n0] + (1) Naringenin chalcone[n0]	NARINGENIN-CHALCONE-SYNTHASE-RXN.c	R_R01613_c	R01613_c
rxn01179_r0	(3) H+[r0] + (3) Malonyl-CoA[r0] + (1) p-Coumaroyl-CoA[r0] => (3) CO2[r0] + (4) CoA[r0] + (1) Naringenin chalcone[r0]	NARINGENIN-CHALCONE-SYNTHASE-RXN.c	R_R01613_c	R01613_c
rxn01180_c0	(3) H+[c0] + (3) Malonyl-CoA[c0] + (1) p-Coumaroyl-CoA[c0] => (4) CO2[c0] + (4) CoA[c0] + (1) Resveratrol[c0]	RXN-87.c
rxn01181_c0	(1) 4-Hydroxycinnamyl aldehyde[c0] + (1) CoA[c0] + (1) NADP+[c0] <=> (1) H+[c0] + (1) NADPH[c0] + (1) p-Coumaroyl-CoA[c0]	RXN-1101.c	R_R01615_c	R01615_c
rxn01182_c0	(1) 4-Coumarate[c0] + (1) ATP[c0] + (1) CoA[c0] => (1) AMP[c0] + (1) Diphosphate[c0] + (1) H+[c0] + (1) p-Coumaroyl-CoA[c0]	4-COUMARATE--COA-LIGASE-RXN.c	R_R01616_c	R01616_c
rxn01183_c0	(1) Agmatine[c0] + (1) p-Coumaroyl-CoA[c0] => (1) CoA[c0] + (1) H+[c0] + (1) p-Coumaroylagmatine[c0]
rxn01199_c0	(1) ATP[c0] + (1) D-Xylulose[c0] => (1) ADP[c0] + (1) D-Xylulose 5-phosphate[c0] + (1) H+[c0]	XYLULOKIN-RXN.c	R_R01639_c	R01639_c
rxn01199_d0	(1) ATP[d0] + (1) D-Xylulose[d0] => (1) ADP[d0] + (1) D-Xylulose 5-phosphate[d0] + (1) H+[d0]	XYLULOKIN-RXN.c	R_R01639_c	R01639_c
rxn01200_c0	(1) D-Glyceraldehyde 3-phosphate[c0] + (1) Sedoheptulose 7-phosphate[c0] <=> (1) D-Ribose 5-phosphate[c0] + (1) D-Xylulose 5-phosphate[c0]	1TRANSKETO-RXN.c	R_R01641_c	R01641_c
rxn01201_c0	(1) 4-Hydroxybutanoic acid[c0] + (1) NAD+[c0] <=> (1) H+[c0] + (1) NADH[c0] + (1) Succinate semialdehyde[c0]	4-HYDROXYBUTYRATE-DEHYDROGENASE-RXN.c|RXN-6903.c.araexp.NAD_NADH
rxn01204_c0	(1) 2-Oxoglutarate[c0] + (1) 4-Aminobutanoate[c0] <=> (1) L-Glutamate[c0] + (1) Succinate semialdehyde[c0]	GABATRANSAM-RXN.c
rxn01207_c0	(1) 4-Methyl-2-oxopentanoate[c0] + (1) CoA[c0] + (1) NAD+[c0] <=> (1) 3-Methylbutanoyl-CoA[c0] + (1) CO2[c0] + (1) NADH[c0]
rxn01208_c0	(1) 4-Methyl-2-oxopentanoate[c0] + (1) CO2[c0] <= (1) (2S)-2-Isopropyl-3-oxosuccinate[c0] + (1) H+[c0]	RXN-7800.c	R_R01652_c	R01652_c
rxn01211_c0	(1) 5,10-Methenyltetrahydrofolate[c0] + (1) H2O[c0] <= (1) 10-Formyltetrahydrofolate[c0] + (1) H+[c0]	METHENYLTHFCYCLOHYDRO-RXN.c	R_R01655_c	R01655_c
rxn01211_d0	(1) 5,10-Methenyltetrahydrofolate[d0] + (1) H2O[d0] <=> (1) 10-Formyltetrahydrofolate[d0] + (1) H+[d0]	METHENYLTHFCYCLOHYDRO-RXN.c	R_R01655_c	R01655_c
rxn01213_c0	(1) Dimethylallyl diphosphate[c0] + (1) Isopentenyl diphosphate[c0] => (1) Diphosphate[c0] + (1) Geranyl diphosphate[c0] + (1) H+[c0]	GPPSYN-RXN.c	R_R01658_c	R01658_c
rxn01213_m0	(1) Dimethylallyl diphosphate[m0] + (1) Isopentenyl diphosphate[m0] => (1) Diphosphate[m0] + (1) Geranyl diphosphate[m0] + (1) H+[m0]	GPPSYN-RXN.c	R_R01658_c	R01658_c
rxn01213_r0	(1) Dimethylallyl diphosphate[r0] + (1) Isopentenyl diphosphate[r0] => (1) Diphosphate[r0] + (1) Geranyl diphosphate[r0] + (1) H+[r0]	GPPSYN-RXN.c	R_R01658_c	R01658_c
rxn01217_c0	(1) H+[c0] + (1) H2O[c0] + (1) dCMP[c0] => (1) NH3[c0] + (1) dUMP[c0]	DCMP-DEAMINASE-RXN.c	R_R01663_c	R01663_c
rxn01218_c0	(1) H2O[c0] + (1) dCMP[c0] <=> (1) Deoxycytidine[c0] + (1) Orthophosphate[c0]		R_R01664_c	R01664_c
rxn01219_c0	(1) ATP[c0] + (1) H+[c0] + (1) dCMP[c0] <=> (1) ADP[c0] + (1) dCDP[c0]	RXN-7913.c	R_R01665_c	R01665_c
rxn01219_n0	(1) ATP[n0] + (1) H+[n0] + (1) dCMP[n0] <=> (1) ADP[n0] + (1) dCDP[n0]	RXN-7913.c	R_R01665_c	R01665_c
rxn01220_c0	(1) ATP[c0] + (1) Deoxycytidine[c0] => (1) ADP[c0] + (1) H+[c0] + (1) dCMP[c0]	DEOXYCYTIDINE-KINASE-RXN.c.araexp.ADP_ATP	R_R01666_c	R01666_c
rxn01221_c0	(1) H2O[c0] + (1) dCDP[c0] => (2) H+[c0] + (1) Orthophosphate[c0] + (1) dCMP[c0]	NUCLEOSIDE-DIPHOSPHATASE-RXN.c.araexp.DCDP_DCMP
rxn01222_c0	(1) H2O[c0] + (1) dCTP[c0] => (1) Diphosphate[c0] + (2) H+[c0] + (1) dCMP[c0]	3.6.1.19-RXN.c.araexp.DCMP_DCTP|DCTP-PYROPHOSPHATASE-RXN.c
rxn01225_c0	(1) Guanine[c0] + (1) H+[c0] + (1) H2O[c0] => (1) NH3[c0] + (1) Xanthine[c0]	GUANINE-DEAMINASE-RXN.c	R_R01676_c	R01676_c
rxn01231_c0	(1) H+[c0] + (1) L-Cysteate[c0] <=> (1) CO2[c0] + (1) Taurine[c0]		R_R01682_c	R01682_c
rxn01241_c0	(1) Dihydrolipoamide[c0] + (1) NAD+[c0] <=> (1) H+[c0] + (1) Lipoamide[c0] + (1) NADH[c0]	DIHYDLIPOXN-RXN.c
rxn01241_n0	(1) Dihydrolipoamide[n0] + (1) NAD+[n0] <=> (1) H+[n0] + (1) Lipoamide[n0] + (1) NADH[n0]	DIHYDLIPOXN-RXN.c
rxn01242_c0	(1) Enzyme N6-(lipoyl)lysine[c0] + (1) H+[c0] + (1) Pyruvate[c0] => (1) CO2[c0] + (1) [Dihydrolipoyllysine-residue acetyltransferase] S-acetyldihydrolipoyllysine[c0]
rxn01242_d0	(1) Enzyme N6-(lipoyl)lysine[d0] + (1) H+[d0] + (1) Pyruvate[d0] => (1) CO2[d0] + (1) [Dihydrolipoyllysine-residue acetyltransferase] S-acetyldihydrolipoyllysine[d0]
rxn01242_m0	(1) Enzyme N6-(lipoyl)lysine[m0] + (1) H+[m0] + (1) Pyruvate[m0] => (1) CO2[m0] + (1) [Dihydrolipoyllysine-residue acetyltransferase] S-acetyldihydrolipoyllysine[m0]
rxn01248_c0	(1) NAD+[c0] + (1) Pyridoxal[c0] <=> (1) 4-Pyridoxolactone[c0] + (1) H+[c0] + (1) NADH[c0]	PYRIDOXAL-4-DEHYDROGENASE-RXN.c
rxn01249_c0	(1) NADP+[c0] + (1) Pyridoxine[c0] <=> (1) H+[c0] + (1) NADPH[c0] + (1) Pyridoxal[c0]	PYRIDOXINE-4-DEHYDROGENASE-RXN.c
rxn01253_c0	(1) Pyridoxamine[c0] + (1) Pyruvate[c0] <= (1) L-Alanine[c0] + (1) Pyridoxal[c0]
rxn01255_c0	(1) 5-O-(1-Carboxyvinyl)-3-phosphoshikimate[c0] => (1) Chorismate[c0] + (1) Orthophosphate[c0]	CHORISMATE-SYNTHASE-RXN.c	R_R01714_c	R01714_c
rxn01256_c0	(1) Chorismate[c0] => (1) Prephenate[c0]	CHORISMATEMUT-RXN.c	R_R01715_c	R01715_c
rxn01257_c0	(1) Chorismate[c0] + (1) L-Glutamine[c0] <=> (1) 4-Amino-4-deoxychorismate[c0] + (1) L-Glutamate[c0]	PABASYN-RXN.c	R_R01716_c	R01716_c
rxn01258_c0	(1) Chorismate[c0] <=> (1) Isochorismate[c0]	ISOCHORSYN-RXN.c	R_R01717_c	R01717_c
rxn01265_c0	(1) Diphosphate[c0] + (1) Nicotinate D-ribonucleotide[c0] <= (1) 5-Phospho-alpha-D-ribose 1-diphosphate[c0] + (1) Nicotinate[c0]	NICOTINATEPRIBOSYLTRANS-RXN.c	R_R01724_c	R01724_c
rxn01268_c0	(1) NAD+[c0] + (1) Prephenate[c0] => (1) 3-(4-Hydroxyphenyl)pyruvate[c0] + (1) CO2[c0] + (1) NADH[c0]	PREPHENATEDEHYDROG-RXN.c	R_R01728_c	R01728_c
rxn01269_c0	(1) NADP+[c0] + (1) Prephenate[c0] => (1) 3-(4-Hydroxyphenyl)pyruvate[c0] + (1) CO2[c0] + (1) NADPH[c0]	PREPHENATE-DEHYDROGENASE-NADP+-RXN.c
rxn01270_c0	(1) L-Arogenate[c0] + (1) Oxaloacetate[c0] <=> (1) L-Aspartate[c0] + (1) Prephenate[c0]
rxn01274_c0	(1) (R)-S-Lactoylglutathione[c0] + (1) H2O[c0] => (1) (R)-Lactate[c0] + (1) Glutathione[c0] + (1) H+[c0]	GLYOXII-RXN.c	R_R01736_c	R01736_c
rxn01275_c0	(1) ATP[c0] + (1) D-Gluconic acid[c0] => (1) 6-Phospho-D-gluconate[c0] + (1) ADP[c0] + (1) H+[c0]	GLUCONOKIN-RXN.c	R_R01737_c	R01737_c
rxn01280_c0	(1) D-Glycerate[c0] + (1) NAD+[c0] <=> (1) 2-Hydroxy-3-oxopropanoate[c0] + (1) H+[c0] + (1) NADH[c0]	RXN0-5289.c|TSA-REDUCT-RXN.c.araexp.NAD_NADH
rxn01281_c0	(1) D-Glycerate[c0] + (1) NADP+[c0] <=> (1) 2-Hydroxy-3-oxopropanoate[c0] + (1) H+[c0] + (1) NADPH[c0]	TSA-REDUCT-RXN.c.araexp.NADP_NADPH
rxn01286_c0	(1) D-Glyceraldehyde[c0] + (1) H2O[c0] + (1) NAD+[c0] <=> (1) D-Glycerate[c0] + (2) H+[c0] + (1) NADH[c0]	GLYCERALDEHYDE-DEHYDRO-RXN.c	R_R01752_c	R01752_c
rxn01293_c0	(1) Benzyl alcohol[c0] + (1) NAD+[c0] <=> (1) Aromatic aldehyde[c0] + (1) H+[c0] + (1) NADH[c0]	BENZYL-ALC-DEHYDROGENASE-RXN.c
rxn01296_c0	(1) Mandelonitrile[c0] <=> (1) Aromatic aldehyde[c0] + (1) Cyanide[c0]			R01767_c
rxn01297_c0	(1) H2O[c0] + (1) Hypoxanthine[c0] + (1) NAD+[c0] <=> (1) H+[c0] + (1) NADH[c0] + (1) Xanthine[c0]	RXN-7682.c	R_R01768_c	R01768_c
rxn01298_c0	(1) H2O[c0] + (1) Hypoxanthine[c0] + (1) Oxygen[c0] => (1) Hydrogen peroxide[c0] + (1) Xanthine[c0]		R_R01769_c	R01769_c
rxn01300_c0	(1) ATP[c0] + (1) L-Homoserine[c0] => (1) ADP[c0] + (1) H+[c0] + (1) O-Phospho-L-homoserine[c0]		R_R01771_c	R01771_c
rxn01301_c0	(1) L-Homoserine[c0] + (1) NAD+[c0] <=> (1) H+[c0] + (1) L-Aspartate 4-semialdehyde[c0] + (1) NADH[c0]	HOMOSERDEHYDROG-RXN.c.araexp.NAD_NADH	R_R01773_c	R01773_c
rxn01302_c0	(1) L-Homoserine[c0] + (1) NADP+[c0] <=> (1) H+[c0] + (1) L-Aspartate 4-semialdehyde[c0] + (1) NADPH[c0]	HOMOSERDEHYDROG-RXN.c.araexp.NADP_NADPH		R01775_c
rxn01307_c0	(1) 2-Dehydro-3-deoxy-L-arabinonate[c0] <= (1) Glycolaldehyde[c0] + (1) Pyruvate[c0]
rxn01310_c0	(1) D-Sorbitol[c0] + (1) NADP+[c0] <=> (1) H+[c0] + (1) NADPH[c0] + (1) alpha-D-Glucose[c0]
rxn01329_c0	(1) D-Mannose 6-phosphate[c0] <=> (1) D-Mannose 1-phosphate[c0]	PHOSMANMUT-RXN.c	R_R01818_c	R01818_c
rxn01332_c0	(1) D-Erythrose 4-phosphate[c0] + (1) H2O[c0] + (1) Phosphoenolpyruvate[c0] => (1) 2-Dehydro-3-deoxy-D-arabino-heptonate 7-phosphate[c0] + (1) Orthophosphate[c0]	DAHPSYN-RXN.c	R_R01826_c	R01826_c
rxn01333_c0	(1) D-Glyceraldehyde 3-phosphate[c0] + (1) Sedoheptulose 7-phosphate[c0] <=> (1) D-Erythrose 4-phosphate[c0] + (1) beta-D-Fructose 6-phosphate[c0]	TRANSALDOL-RXN.c	R_R01827_c	R01827_c
rxn01334_c0	(1) Sedoheptulose 1,7-bisphosphate[c0] <=> (1) D-Erythrose 4-phosphate[c0] + (1) Glycerone phosphate[c0]	SEDOBISALDOL-RXN.c	R_R01829_c	R01829_c
rxn01336_c0	(1) NAD+[c0] + (1) Testosterone[c0] <=> (1) Androstenedione[c0] + (1) H+[c0] + (1) NADH[c0]	1.1.1.239-RXN.c|1.1.1.51-RXN.c.araexp.NAD_NADH|TESTOSTERONE-17-BETA-DEHYDROGENASE-RXN.c
rxn01338_c0	(1) NADP+[c0] + (1) Testosterone[c0] <=> (1) Androstenedione[c0] + (1) H+[c0] + (1) NADPH[c0]	1.1.1.51-RXN.c.araexp.NADP_NADPH|1.1.1.64-RXN.c
rxn01345_c0	(1) H2O[c0] + (1) Sedoheptulose 1,7-bisphosphate[c0] <=> (1) Orthophosphate[c0] + (1) Sedoheptulose 7-phosphate[c0]	SEDOHEPTULOSE-BISPHOSPHATASE-RXN.c	R_R01845_c
rxn01351_c0	(1) H2O[c0] + (1) dGTP[c0] => (1) Diphosphate[c0] + (2) H+[c0] + (1) dGMP[c0]	3.6.1.19-RXN.c.araexp.DGMP_DGTP	R_R01855_c	R01855_c
rxn01353_c0	(1) ATP[c0] + (1) dGDP[c0] <=> (1) ADP[c0] + (1) dGTP[c0]	DGDPKIN-RXN.c	R_R01857_c	R01857_c
rxn01353_x0	(1) ATP[x0] + (1) dGDP[x0] <=> (1) ADP[x0] + (1) dGTP[x0]	DGDPKIN-RXN.c	R_R01857_c	R01857_c
rxn01354_c0	(1) Pyruvate[c0] + (1) dGTP[c0] <=> (1) H+[c0] + (1) Phosphoenolpyruvate[c0] + (1) dGDP[c0]			R01858_c
rxn01358_c0	(1) Inosine[c0] + (1) Orthophosphate[c0] <=> (1) Hypoxanthine[c0] + (1) alpha-D-Ribose 1-phosphate[c0]	INOPHOSPHOR-RXN.c	R_R01863_c	R01863_c
rxn01362_c0	(1) Diphosphate[c0] + (1) H+[c0] + (1) Orotidine 5'-phosphate[c0] <= (1) 5-Phospho-alpha-D-ribose 1-diphosphate[c0] + (1) Orotate[c0]	OROPRIBTRANS-RXN.c	R_R01870_c	R01870_c
rxn01365_c0	(1) D-Cysteine[c0] + (1) H2O[c0] => (1) H+[c0] + (1) Hydrogen sulfide[c0] + (1) NH3[c0] + (1) Pyruvate[c0]	DCYSDESULF-RXN.c
rxn01366_c0	(1) Orthophosphate[c0] + (1) Uridine[c0] <=> (1) Uracil[c0] + (1) alpha-D-Ribose 1-phosphate[c0]	URPHOS-RXN.c	R_R01876_c	R01876_c
rxn01368_c0	(1) Cytidine[c0] + (1) H+[c0] + (1) H2O[c0] => (1) NH3[c0] + (1) Uridine[c0]	CYTIDEAM2-RXN.c	R_R01878_c	R01878_c
rxn01370_c0	(1) Uridine[c0] + (1) dGTP[c0] => (1) H+[c0] + (1) UMP[c0] + (1) dGDP[c0]		R_R01880_c	R01880_c
rxn01370_d0	(1) Uridine[d0] + (1) dGTP[d0] => (1) H+[d0] + (1) UMP[d0] + (1) dGDP[d0]		R_R01880_c	R01880_c
rxn01374_c0	(1) Creatinine[c0] + (1) H2O[c0] <=> (1) Creatine[c0]	CREATININASE-RXN.c
rxn01374_x0	(1) Creatinine[x0] + (1) H2O[x0] <=> (1) Creatine[x0]	CREATININASE-RXN.c
rxn01380_c0	(1) CTP[c0] + (1) Choline phosphate[c0] <=> (1) CDP-choline[c0] + (1) Diphosphate[c0]	2.7.7.15-RXN.c	R_R01890_c	R01890_c
rxn01392_c0	(1) NADP+[c0] + (1) Xylitol[c0] <=> (1) H+[c0] + (1) L-Xylulose[c0] + (1) NADPH[c0]	L-XYLULOSE-REDUCTASE-RXN.c
rxn01393_c0	(1) 3-Dehydro-L-gulonate[c0] + (1) H+[c0] => (1) CO2[c0] + (1) L-Xylulose[c0]
rxn01395_c0	(1) H+[c0] + (1) Oxalyl-CoA[c0] <=> (1) CO2[c0] + (1) Formyl-CoA[c0]	OXALYL-COA-DECARBOXYLASE-RXN.c
rxn01396_c0	(1) ATP[c0] + (1) Pyridoxine[c0] => (1) ADP[c0] + (1) H+[c0] + (1) Pyridoxine phosphate[c0]	PNKIN-RXN.c	R_R01909_c	R01909_c
rxn01401_c0	(1) H2O[c0] + (1) Oxygen[c0] + (1) Spermidine[c0] => (1) 1,3-Diaminopropane[c0] + (1) 4-Aminobutyraldehyde[c0] + (1) Hydrogen peroxide[c0]
rxn01406_c0	(1) Putrescine[c0] + (1) S-Adenosylmethioninamine[c0] <=> (1) 5'-Methylthioadenosine[c0] + (1) H+[c0] + (1) Spermidine[c0]	SPERMIDINESYN-RXN.c	R_R01920_c	R01920_c
rxn01411_c0	(1) ATP[c0] + (1) Sphingosine[c0] => (1) ADP[c0] + (1) H+[c0] + (1) Sphingosine 1-phosphate[c0]
rxn01416_c0	(1) Cyanide[c0] + (1) Thiosulfate[c0] <=> (1) H+[c0] + (1) Sulfite[c0] + (1) Thiocyanate[c0]
rxn01416_m0	(1) Cyanide[m0] + (1) Thiosulfate[m0] <=> (1) H+[m0] + (1) Sulfite[m0] + (1) Thiocyanate[m0]
rxn01416_n0	(1) Cyanide[n0] + (1) Thiosulfate[n0] <=> (1) H+[n0] + (1) Sulfite[n0] + (1) Thiocyanate[n0]
rxn01418_c0	(1) 2-Oxoadipate[c0] + (1) CoA[c0] + (1) NAD+[c0] => (1) CO2[c0] + (1) Glutaryl-CoA[c0] + (1) NADH[c0]	2-KETO-ADIPATE-DEHYDROG-RXN.c	R_R01933_c	R01933_c
rxn01418_d0	(1) 2-Oxoadipate[d0] + (1) CoA[d0] + (1) NAD+[d0] => (1) CO2[d0] + (1) Glutaryl-CoA[d0] + (1) NADH[d0]	2-KETO-ADIPATE-DEHYDROG-RXN.c	R_R01933_c	R01933_c
rxn01418_n0	(1) 2-Oxoadipate[n0] + (1) CoA[n0] + (1) NAD+[n0] => (1) CO2[n0] + (1) Glutaryl-CoA[n0] + (1) NADH[n0]	2-KETO-ADIPATE-DEHYDROG-RXN.c	R_R01933_c	R01933_c
rxn01423_c0	(1) 2-Oxoglutarate[c0] + (1) L-2-Aminoadipate[c0] <=> (1) 2-Oxoadipate[c0] + (1) L-Glutamate[c0]	2-AMINOADIPATE-AMINOTRANSFERASE-RXN.c
rxn01425_c0	(1) Caffeic aldehyde[c0] + (1) CoA[c0] + (1) NADP+[c0] <=> (1) Caffeoyl-CoA[c0] + (1) H+[c0] + (1) NADPH[c0]		R_R01941_c	R01941_c
rxn01426_c0	(1) Caffeoyl-CoA[c0] + (1) S-Adenosyl-L-methionine[c0] <=> (1) Feruloyl-CoA[c0] + (1) H+[c0] + (1) S-Adenosyl-L-homocysteine[c0]	CAFFEOYL-COA-O-METHYLTRANSFERASE-RXN.c	R_R01942_c	R01942_c
rxn01427_c0	(1) ATP[c0] + (1) Caffeate[c0] + (1) CoA[c0] => (1) AMP[c0] + (1) Caffeoyl-CoA[c0] + (1) Diphosphate[c0] + (1) H+[c0]	RXN-1126.c	R_R01943_c	R01943_c
rxn01427_x0	(1) ATP[x0] + (1) Caffeate[x0] + (1) CoA[x0] => (1) AMP[x0] + (1) Caffeoyl-CoA[x0] + (1) Diphosphate[x0] + (1) H+[x0]	RXN-1126.c	R_R01943_c	R01943_c
rxn01429_c0	(1) Caffeoyl-CoA[c0] + (1) Quinate[c0] <=> (1) Chlorogenate[c0] + (1) CoA[c0]	RXN-2622.c
rxn01431_c0	(1) GTP[c0] + (1) L-Fucose 1-phosphate[c0] => (1) Diphosphate[c0] + (1) GDP-L-fucose[c0]
rxn01434_c0	(1) ATP[c0] + (1) L-Aspartate[c0] + (1) L-Citrulline[c0] => (1) AMP[c0] + (1) Diphosphate[c0] + (2) H+[c0] + (1) N-(L-Arginino)succinate[c0]	ARGSUCCINSYN-RXN.c	R_R01954_c	R01954_c
rxn01444_c0	(1) ATP[c0] + (1) Deoxyguanosine[c0] => (1) ADP[c0] + (1) H+[c0] + (1) dGMP[c0]		R_R01967_c	R01967_c
rxn01445_c0	(1) H2O[c0] + (1) dGMP[c0] <=> (1) Deoxyguanosine[c0] + (1) Orthophosphate[c0]		R_R01968_c	R01968_c
rxn01450_c0	(1) H+[c0] + (1) Indolepyruvate[c0] <=> (1) CO2[c0] + (1) Indole-3-acetaldehyde[c0]	4.1.1.74-RXN.c
rxn01451_c0	(1) (S)-3-Hydroxybutanoyl-CoA[c0] + (1) NAD+[c0] <=> (1) Acetoacetyl-CoA[c0] + (1) H+[c0] + (1) NADH[c0]	RXN-11662.c|RXN-12569.c
rxn01451_r0	(1) (S)-3-Hydroxybutanoyl-CoA[r0] + (1) NAD+[r0] <=> (1) Acetoacetyl-CoA[r0] + (1) H+[r0] + (1) NADH[r0]	RXN-11662.c|RXN-12569.c
rxn01452_c0	(1) (S)-3-Hydroxybutanoyl-CoA[c0] + (1) NADP+[c0] <=> (1) Acetoacetyl-CoA[c0] + (1) H+[c0] + (1) NADPH[c0]	3-HYDROXYBUTYRYL-COA-DEHYDROGENASE-RXN.c	R_R01976_c	R01976_c
rxn01454_c0	(1) (S)-3-Hydroxy-3-methylglutaryl-CoA[c0] + (1) CoA[c0] + (1) H+[c0] <= (1) Acetoacetyl-CoA[c0] + (1) Acetyl-CoA[c0] + (1) H2O[c0]	HYDROXYMETHYLGLUTARYL-COA-SYNTHASE-RXN.c	R_R01978_c	R01978_c
rxn01455_c0	(1) ATP[c0] + (1) D-Galacturonate[c0] <=> (1) 1-Phospho-alpha-D-galacturonate[c0] + (1) ADP[c0] + (1) H+[c0]	GALACTURONOKINASE-RXN.c|GALACTURONOKINASE-RXN.c.araexp.D-GALACTURONATE
rxn01459_c0	(1) 4-Aminobutyraldehyde[c0] + (1) H2O[c0] + (1) NADP+[c0] <=> (1) 4-Aminobutanoate[c0] + (2) H+[c0] + (1) NADPH[c0]		R_R01986_c	R01986_c
rxn01460_c0	(1) 4-Aminobutanoate[c0] + (1) Acetate[c0] <= (1) 4-Acetamidobutanoate[c0] + (1) H2O[c0]
rxn01461_c0	(1) 4-Aminobutanoate[c0] + (1) L-Arginine[c0] <= (1) 4-Guanidinobutanoate[c0] + (1) L-Ornithine[c0]
rxn01465_c0	(1) (S)-Dihydroorotate[c0] + (1) H2O[c0] <=> (1) H+[c0] + (1) N-Carbamoyl-L-aspartate[c0]	DIHYDROOROT-RXN.c	R_R01993_c	R01993_c
rxn01466_c0	(1) Geranyl diphosphate[c0] + (1) Isopentenyl diphosphate[c0] => (1) Diphosphate[c0] + (1) H+[c0] + (1) trans,trans-Farnesyl diphosphate[c0]	FPPSYN-RXN.c	R_R02003_c	R02003_c
rxn01466_m0	(1) Geranyl diphosphate[m0] + (1) Isopentenyl diphosphate[m0] => (1) Diphosphate[m0] + (1) H+[m0] + (1) trans,trans-Farnesyl diphosphate[m0]	FPPSYN-RXN.c	R_R02003_c	R02003_c
rxn01466_r0	(1) Geranyl diphosphate[r0] + (1) Isopentenyl diphosphate[r0] <=> (1) Diphosphate[r0] + (1) H+[r0] + (1) trans,trans-Farnesyl diphosphate[r0]	FPPSYN-RXN.c	R_R02003_c	R02003_c
rxn01471_c0	(1) Geranyl diphosphate[c0] <=> (1) Diphosphate[c0] + (1) H+[c0] + (1) Myrcene[c0]	RXN-5110.c		R02009_c
rxn01472_c0	(1) Geranyl diphosphate[c0] => (1) Diphosphate[c0] + (1) H+[c0] + (1) Terpinolene[c0]	RXN-5108.c		R02010_c
rxn01473_c0	(1) Geranyl diphosphate[c0] => (1) (-)-Limonene[c0] + (1) Diphosphate[c0] + (1) H+[c0]	4.2.3.16-RXN.c
rxn01476_c0	(1) D-Glucono-1,5-lactone 6-phosphate[c0] + (1) H2O[c0] <=> (1) 6-Phospho-D-gluconate[c0] + (1) H+[c0]	6PGLUCONOLACT-RXN.c	R_R02035_c	R02035_c
rxn01478_c0	(1) Ethanolamine phosphate[c0] + (1) S-Adenosyl-L-methionine[c0] <=> (1) H+[c0] + (1) N-Methylethanolamine phosphate[c0] + (1) S-Adenosyl-L-homocysteine[c0]	2.1.1.103-RXN.c	R_R02037_c	R02037_c
rxn01479_c0	(1) CTP[c0] + (1) Ethanolamine phosphate[c0] <=> (1) CDP-ethanolamine[c0] + (1) Diphosphate[c0]	2.7.7.14-RXN.c	R_R02038_c	R02038_c
rxn01483_c0	(1) Acetyl-CoA[c0] + (1) D-Glucosamine 6-phosphate[c0] => (1) CoA[c0] + (1) H+[c0] + (1) N-Acetyl-D-glucosamine 6-phosphate[c0]	GLUCOSAMINEPNACETYLTRANS-RXN.c|GLUCOSAMINEPNACETYLTRANS-RXN.c.araexp.D-GLUCOSAMINE-6-P	R_R02058_c	R02058_c
rxn01485_c0	(1) alpha-D-Glucosamine 1-phosphate[c0] <=> (1) D-Glucosamine 6-phosphate[c0]	5.4.2.10-RXN.c
rxn01486_c0	(1) Isopentenyl diphosphate[c0] + (1) trans,trans-Farnesyl diphosphate[c0] => (1) Diphosphate[c0] + (1) Geranylgeranyl diphosphate[c0] + (1) H+[c0]		R_R02061_c	R02061_c
rxn01487_c0	(1) Geranylgeranyl diphosphate[c0] + (3) H+[c0] + (3) NADPH[c0] => (3) NADP+[c0] + (1) Phytyl diphosphate[c0]	RXN-10625.c	R_R02063_c	R02063_c
rxn01488_c0	(1) Geranylgeranyl diphosphate[c0] <=> (1) Casbene[c0] + (1) Diphosphate[c0] + (1) H+[c0]	CASBENE-SYNTHASE-RXN.c
rxn01489_c0	(2) Geranylgeranyl diphosphate[c0] => (1) Diphosphate[c0] + (1) H+[c0] + (1) Prephytoene diphosphate[c0]	2.5.1.32-RXN.c		R02065_c
rxn01490_c0	(1) Geranylgeranyl diphosphate[c0] => (1) ent-Copalyl diphosphate[c0]	5.5.1.13-RXN.c	R_R02068_c	R02068_c
rxn01494_c0	(1) 3,4-Dihydroxy-L-phenylalanine[c0] + (1) Oxygen[c0] => (1) 4-(L-Alanin-3-yl)-2-hydroxy-cis,cis-muconate 6-semialdehyde[c0] + (1) H+[c0]	RXN-8460.c
rxn01496_c0	(1) 2-Oxoglutarate[c0] + (1) 3,4-Dihydroxy-L-phenylalanine[c0] <=> (1) 3-(3,4-Dihydroxyphenyl)pyruvate[c0] + (1) L-Glutamate[c0]	2.6.1.49-RXN.c
rxn01499_c0	(1) 3,4-Dihydroxy-L-phenylalanine[c0] + (1) H+[c0] => (1) CO2[c0] + (1) Dopamine[c0]		R_R02080_c	R02080_c
rxn01500_c0	(1) (R)-Mevalonate[c0] + (1) CoA[c0] + (2) NAD+[c0] <= (1) (S)-3-Hydroxy-3-methylglutaryl-CoA[c0] + (2) H+[c0] + (2) NADH[c0]	HYDROXYMETHYLGLUTARYL-COA-REDUCTASE-RXN.c
rxn01501_c0	(1) (R)-Mevalonate[c0] + (1) CoA[c0] + (2) NADP+[c0] <= (1) (S)-3-Hydroxy-3-methylglutaryl-CoA[c0] + (2) H+[c0] + (2) NADPH[c0]	1.1.1.34-RXN.c	R_R02082_c	R02082_c
rxn01504_c0	(1) (S)-3-Hydroxy-3-methylglutaryl-CoA[c0] <=> (1) 3-Methylglutaconyl-CoA[c0] + (1) H2O[c0]	METHYLGLUTACONYL-COA-HYDRATASE-RXN.c
rxn01504_v0	(1) (S)-3-Hydroxy-3-methylglutaryl-CoA[v0] <=> (1) 3-Methylglutaconyl-CoA[v0] + (1) H2O[v0]	METHYLGLUTACONYL-COA-HYDRATASE-RXN.c
rxn01505_c0	(1) N-Acetyl-D-glucosamine 6-phosphate[c0] <=> (1) N-Acetyl-alpha-D-glucosamine 1-phosphate[c0]	PHOSACETYLGLUCOSAMINEMUT-RXN.c	R_R08193_c	R08193_c
rxn01507_c0	(1) H2O[c0] + (1) dAMP[c0] <=> (1) Deoxyadenosine[c0] + (1) Orthophosphate[c0]		R_R02088_c	R02088_c
rxn01509_c0	(1) ATP[c0] + (1) H+[c0] + (1) dGMP[c0] <=> (1) ADP[c0] + (1) dGDP[c0]	GMKALT-RXN.c	R_R02090_c	R02090_c
rxn01510_c0	(1) Cytidine[c0] + (1) dGTP[c0] => (1) CMP[c0] + (1) H+[c0] + (1) dGDP[c0]		R_R02091_c	R02091_c
rxn01510_d0	(1) Cytidine[d0] + (1) dGTP[d0] => (1) CMP[d0] + (1) H+[d0] + (1) dGDP[d0]		R_R02091_c	R02091_c
rxn01511_c0	(1) H2O[c0] + (1) dTDP[c0] => (2) H+[c0] + (1) Orthophosphate[c0] + (1) dTMP[c0]	NUCLEOSIDE-DIPHOSPHATASE-RXN.c.araexp.TDP_TMP	R_R02092_c	R02092_c
rxn01511_g0	(1) H2O[g0] + (1) dTDP[g0] => (2) H+[g0] + (1) Orthophosphate[g0] + (1) dTMP[g0]	NUCLEOSIDE-DIPHOSPHATASE-RXN.c.araexp.TDP_TMP	R_R02092_c	R02092_c
rxn01512_c0	(1) ATP[c0] + (1) dTDP[c0] <=> (1) ADP[c0] + (1) dTTP[c0]	DTDPKIN-RXN.c	R_R02093_c	R02093_c
rxn01512_x0	(1) ATP[x0] + (1) dTDP[x0] <=> (1) ADP[x0] + (1) dTTP[x0]	DTDPKIN-RXN.c	R_R02093_c	R02093_c
rxn01513_c0	(1) ATP[c0] + (1) H+[c0] + (1) dTMP[c0] <=> (1) ADP[c0] + (1) dTDP[c0]	DTMPKI-RXN.c	R_R02094_c	R02094_c
rxn01514_c0	(1) H2O[c0] + (1) dTTP[c0] => (1) H+[c0] + (1) Orthophosphate[c0] + (1) dTDP[c0]	NUCLEOSIDE-TRIPHOSPHATASE-RXN.c.araexp.TDP_TTP	R_R02095_c	R02095_c
rxn01514_g0	(1) H2O[g0] + (1) dTTP[g0] => (1) H+[g0] + (1) Orthophosphate[g0] + (1) dTDP[g0]	NUCLEOSIDE-TRIPHOSPHATASE-RXN.c.araexp.TDP_TTP	R_R02095_c	R02095_c
rxn01515_c0	(1) Cytidine[c0] + (1) dTTP[c0] => (1) CMP[c0] + (1) H+[c0] + (1) dTDP[c0]		R_R02096_c	R02096_c
rxn01515_d0	(1) Cytidine[d0] + (1) dTTP[d0] => (1) CMP[d0] + (1) H+[d0] + (1) dTDP[d0]		R_R02096_c	R02096_c
rxn01516_c0	(1) Uridine[c0] + (1) dTTP[c0] => (1) H+[c0] + (1) UMP[c0] + (1) dTDP[c0]		R_R02097_c	R02097_c
rxn01516_d0	(1) Uridine[d0] + (1) dTTP[d0] => (1) H+[d0] + (1) UMP[d0] + (1) dTDP[d0]		R_R02097_c	R02097_c
rxn01517_c0	(1) ATP[c0] + (1) H+[c0] + (1) dUMP[c0] <=> (1) ADP[c0] + (1) dUDP[c0]		R_R02098_c	R02098_c
rxn01518_c0	(1) ATP[c0] + (1) Deoxyuridine[c0] => (1) ADP[c0] + (1) H+[c0] + (1) dUMP[c0]	DURIDKI-RXN.c	R_R02099_c	R02099_c
rxn01519_c0	(1) H2O[c0] + (1) dUTP[c0] => (1) Diphosphate[c0] + (2) H+[c0] + (1) dUMP[c0]	3.6.1.19-RXN.c.araexp.DUMP_DUTP|DUTP-PYROP-RXN.c	R_R02100_c	R02100_c
rxn01520_c0	(1) 5,10-Methylenetetrahydrofolate[c0] + (1) dUMP[c0] => (1) Dihydrofolate[c0] + (1) dTMP[c0]	THYMIDYLATESYN-RXN.c	R_R02101_c	R02101_c
rxn01522_c0	(1) H2O[c0] + (1) NAD+[c0] + (1) Xanthine[c0] <=> (1) H+[c0] + (1) NADH[c0] + (1) Urate[c0]	RXN0-901.c	R_R02103_c	R02103_c
rxn01523_c0	(1) H2O[c0] + (1) Oxygen[c0] + (1) Urate[c0] <=> (1) 5-Hydroxyisourate[c0] + (1) Hydrogen peroxide[c0]	URATE-OXIDASE-RXN.c	R_R02106_c	R02106_c
rxn01524_c0	(1) H2O[c0] + (1) Oxygen[c0] + (1) Xanthine[c0] => (1) Hydrogen peroxide[c0] + (1) Urate[c0]	XANTHINE-OXIDASE-RXN.c	R_R02107_c	R02107_c
rxn01527_c0	(1) UDP-glucose[c0] + (1) Zeatin[c0] <=> (1) O-beta-D-Glucosylzeatin[c0] + (1) UDP[c0]	RXN-4723.c.araexp.CPD-12575
rxn01529_c0	(1) H2O[c0] + (1) NAD+[c0] + (1) Retinal[c0] <=> (2) H+[c0] + (1) NADH[c0] + (1) Retinoate[c0]	RETINAL-DEHYDROGENASE-RXN.c
rxn01530_c0	(1) NAD+[c0] + (1) Retinol[c0] <=> (1) H+[c0] + (1) NADH[c0] + (1) Retinal[c0]	RETINOL-DEHYDROGENASE-RXN.c	R_R02124_c	R02124_c
rxn01530_x0	(1) NAD+[x0] + (1) Retinol[x0] <=> (1) H+[x0] + (1) NADH[x0] + (1) Retinal[x0]	RETINOL-DEHYDROGENASE-RXN.c	R_R02124_c	R02124_c
rxn01531_c0	(1) H2O[c0] + (1) Oxygen[c0] + (1) Retinal[c0] => (1) H+[c0] + (1) Hydrogen peroxide[c0] + (1) Retinoate[c0]	RXN-13681.c
rxn01537_c0	(1) H2O[c0] + (1) Thiamine[c0] => (1) 4-Amino-5-hydroxymethyl-2-methylpyrimidine[c0] + (1) 5-(2-Hydroxyethyl)-4-methylthiazole[c0] + (1) H+[c0]
rxn01539_c0	(1) Orthophosphate[c0] + (1) Thiamine[c0] <=> (1) H2O[c0] + (1) Thiamin monophosphate[c0]	RXNQT-4191.c
rxn01539_m0	(1) Orthophosphate[m0] + (1) Thiamine[m0] <=> (1) H2O[m0] + (1) Thiamin monophosphate[m0]	RXNQT-4191.c
rxn01539_x0	(1) Orthophosphate[x0] + (1) Thiamine[x0] <=> (1) H2O[x0] + (1) Thiamin monophosphate[x0]	RXNQT-4191.c
rxn01544_c0	(1) Diphosphate[c0] + (1) H+[c0] + (1) Xanthosine 5'-phosphate[c0] <= (1) 5-Phospho-alpha-D-ribose 1-diphosphate[c0] + (1) Xanthine[c0]	XANPRIBOSYLTRAN-RXN.c	R_R02142_c	R02142_c
rxn01547_c0	(1) Guanosine[c0] + (1) H+[c0] + (1) H2O[c0] => (1) NH3[c0] + (1) Xanthosine[c0]	GUANOSINE-DEAMINASE-RXN.c
rxn01556_c0	(1) Quercetin[c0] + (1) S-Adenosyl-L-methionine[c0] <=> (1) 3-O-Methylquercetin[c0] + (1) H+[c0] + (1) S-Adenosyl-L-homocysteine[c0]	QUERCETIN-3-O-METHYLTRANSFERASE-RXN.c|QUERCETIN-3-O-METHYLTRANSFERASE-RXN.c.araexp.CPD-520	R_R02157_c	R02157_c
rxn01556_n0	(1) Quercetin[n0] + (1) S-Adenosyl-L-methionine[n0] <=> (1) 3-O-Methylquercetin[n0] + (1) H+[n0] + (1) S-Adenosyl-L-homocysteine[n0]	QUERCETIN-3-O-METHYLTRANSFERASE-RXN.c|QUERCETIN-3-O-METHYLTRANSFERASE-RXN.c.araexp.CPD-520	R_R02157_c	R02157_c
rxn01557_c0	(1) Quercetin[c0] + (1) UDP-glucose[c0] <=> (1) Quercetin 3-O-glucoside[c0] + (1) UDP[c0]	RXN-10787.c.araexp.CPD-12575_CPD-520	R_R02158_c	R02158_c
rxn01558_c0	(1) 3'-Phosphoadenylyl sulfate[c0] + (1) Quercetin[c0] => (1) Adenosine 3',5'-bisphosphate[c0] + (1) H+[c0] + (1) Quercetin 3-sulfate[c0]	FLAVONOL-3-SULFOTRANSFERASE-RXN.c|FLAVONOL-3-SULFOTRANSFERASE-RXN.c.araexp.CPD-520
rxn01559_c0	(1) 2-Oxoglutarate[c0] + (1) Oxygen[c0] + (1) Taxifolin[c0] <=> (1) CO2[c0] + (1) H+[c0] + (1) H2O[c0] + (1) Quercetin[c0] + (1) Succinate[c0]	RXN-527.c|RXN-527.c.araexp.CPD-520	R_R02160_c	R02160_c
rxn01564_c0	(1) H2O[c0] + (1) Oxygen[c0] + (1) Tryptamine[c0] => (1) Hydrogen peroxide[c0] + (1) Indole-3-acetaldehyde[c0] + (1) NH3[c0]	RXN-1401.c	R_R02173_c	R02173_c
rxn01566_c0	(1) (-)-Menthol[c0] + (1) NADP+[c0] <=> (1) (-)-Menthone[c0] + (1) H+[c0] + (1) NADPH[c0]	#NAME?
rxn01570_c0	(1) CoA[c0] + (1) Coniferyl aldehyde[c0] + (1) NADP+[c0] <=> (1) Feruloyl-CoA[c0] + (1) H+[c0] + (1) NADPH[c0]	RXN-1106.c	R_R02193_c	R02193_c
rxn01571_c0	(1) ATP[c0] + (1) CoA[c0] + (1) Ferulate[c0] => (1) AMP[c0] + (1) Diphosphate[c0] + (1) Feruloyl-CoA[c0] + (1) H+[c0]	6.2.1.34-RXN.c|RXN-1105.c	R_R02194_c	R02194_c
rxn01572_c0	(1) Feruloyl-CoA[c0] + (1) Quinate[c0] => (1) 5-O-Feruloylquinic acid[c0] + (1) CoA[c0]	2.3.1.99-RXN.c
rxn01575_c0	(1) 2-Oxoglutarate[c0] + (1) L-Isoleucine[c0] <=> (1) (S)-3-Methyl-2-oxopentanoic acid[c0] + (1) L-Glutamate[c0]		R_R02199_c	R02199_c
rxn01580_c0	(1) L-Pipecolate[c0] + (1) Oxygen[c0] => (1) (S)-2,3,4,5-Tetrahydropyridine-2-carboxylate[c0] + (1) H+[c0] + (1) Hydrogen peroxide[c0]	L-PIPECOLATE-OXIDASE-RXN.c
rxn01588_c0	(1) H+[c0] + (1) NADPH[c0] + (1) Progesterone[c0] => (1) 5beta-Pregnane-3,20-dione[c0] + (1) NADP+[c0]	RXN-9726.c
rxn01589_c0	(1) CoA[c0] + (1) NADP+[c0] + (1) Sinapoyl aldehyde[c0] <=> (1) H+[c0] + (1) NADPH[c0] + (1) Sinapoyl-CoA[c0]	RXN-1124.c	R_R02220_c	R02220_c
rxn01590_c0	(1) ATP[c0] + (1) CoA[c0] + (1) Sinapate[c0] => (1) AMP[c0] + (1) Diphosphate[c0] + (1) H+[c0] + (1) Sinapoyl-CoA[c0]	RXN-10919.c	R_R02221_c	R02221_c
rxn01601_c0	(1) Dihydrofolate[c0] + (1) NAD+[c0] <=> (1) Folate[c0] + (1) H+[c0] + (1) NADH[c0]		R_R02235_c	R02235_c
rxn01602_c0	(1) Dihydrofolate[c0] + (1) NADP+[c0] <=> (1) Folate[c0] + (1) H+[c0] + (1) NADPH[c0]			R02236_c
rxn01603_c0	(1) ATP[c0] + (1) Dihydropteroate[c0] + (1) L-Glutamate[c0] <=> (1) ADP[c0] + (1) Dihydrofolate[c0] + (1) H+[c0] + (1) Orthophosphate[c0]		R_R02237_c	R02237_c
rxn01603_d0	(1) ATP[d0] + (1) Dihydropteroate[d0] + (1) L-Glutamate[d0] => (1) ADP[d0] + (1) Dihydrofolate[d0] + (1) H+[d0] + (1) Orthophosphate[d0]		R_R02237_c	R02237_c
rxn01607_c0	(1) (R)-Mevalonate[c0] + (1) ATP[c0] => (1) (R)-5-Phosphomevalonate[c0] + (1) ADP[c0] + (1) H+[c0]	MEVALONATE-KINASE-RXN.c	R_R02245_c	R02245_c
rxn01611_c0	(1) H+[c0] + (1) NADPH[c0] + (1) Oxygen[c0] + (1) trans-Cinnamate[c0] => (1) 4-Coumarate[c0] + (1) H2O[c0] + (1) NADP+[c0]		R_R02253_c	R02253_c
rxn01612_c0	(1) H+[c0] + (1) NADPH[c0] + (1) Oxygen[c0] + (1) trans-Cinnamate[c0] => (1) H2O[c0] + (1) NADP+[c0] + (1) trans-2-Hydroxycinnamate[c0]	TRANS-CINNAMATE-2-MONOOXYGENASE-RXN.c
rxn01613_c0	(1) ATP[c0] + (1) CoA[c0] + (1) trans-Cinnamate[c0] => (1) AMP[c0] + (1) Cinnamoyl-CoA[c0] + (1) Diphosphate[c0] + (1) H+[c0]	RXN-2001.c	R_R02255_c	R02255_c
rxn01613_x0	(1) ATP[x0] + (1) CoA[x0] + (1) trans-Cinnamate[x0] => (1) AMP[x0] + (1) Cinnamoyl-CoA[x0] + (1) Diphosphate[x0] + (1) H+[x0]	RXN-2001.c	R_R02255_c	R02255_c
rxn01614_c0	(1) H+[c0] + (1) UDP-glucose[c0] + (1) trans-Cinnamate[c0] => (1) UDP[c0] + (1) trans-Cinnamoyl beta-D-glucoside[c0]	CINNAMATE-GLUCOSYLTRANSFERASE-RXN.c.araexp.CPD-12575
rxn01619_c0	(1) 2-Dehydro-3-deoxy-L-rhamnonate[c0] <=> (1) (S)-Lactaldehyde[c0] + (1) Pyruvate[c0]	RXN0-5433.c		R02261_c
rxn01619_d0	(1) 2-Dehydro-3-deoxy-L-rhamnonate[d0] <=> (1) (S)-Lactaldehyde[d0] + (1) Pyruvate[d0]	RXN0-5433.c		R02261_c
rxn01622_c0	(1) Prostaglandin H2[c0] <=> (1) Prostaglandin E2[c0]	PROSTAGLANDIN-E-SYNTHASE-RXN.c
rxn01625_c0	(1) Prostaglandin H2[c0] <=> (1) Thromboxane A2[c0]	THROMBOXANE-A-SYNTHASE-RXN.c
rxn01626_c0	(1) 5,6-Dihydrouracil[c0] + (1) H2O[c0] => (1) 3-Ureidopropionate[c0] + (1) H+[c0]	DIHYDROPYRIMIDINASE-RXN.c	R_R02269_c	R02269_c
rxn01626_r0	(1) 5,6-Dihydrouracil[r0] + (1) H2O[r0] => (1) 3-Ureidopropionate[r0] + (1) H+[r0]	DIHYDROPYRIMIDINASE-RXN.c	R_R02269_c	R02269_c
rxn01629_c0	(1) 5-Aminolevulinate[c0] <=> (1) (S)-4-Amino-5-oxopentanoate[c0]	GSAAMINOTRANS-RXN.c	R_R02272_c	R02272_c
rxn01633_c0	(1) 2-Dehydro-3-deoxy-L-arabinonate[c0] => (1) 2,5-Dioxopentanoate[c0] + (1) H2O[c0]
rxn01634_c0	(1) 5-Dehydro-4-deoxy-D-glucarate[c0] + (1) H+[c0] => (1) 2,5-Dioxopentanoate[c0] + (1) CO2[c0] + (1) H2O[c0]
rxn01636_c0	(1) L-Glutamate[c0] + (1) N-Acetylornithine[c0] <=> (1) L-Ornithine[c0] + (1) N-Acetyl-L-glutamate[c0]	GLUTAMATE-N-ACETYLTRANSFERASE-RXN.c	R_R02282_c	R02282_c
rxn01637_c0	(1) 2-Oxoglutarate[c0] + (1) N-Acetylornithine[c0] <=> (1) L-Glutamate[c0] + (1) N-Acetyl-L-glutamate 5-semialdehyde[c0]	ACETYLORNTRANSAM-RXN.c	R_R02283_c	R02283_c
rxn01643_c0	(1) L-Aspartate 4-semialdehyde[c0] + (1) NADP+[c0] + (1) Orthophosphate[c0] <=> (1) 4-Phospho-L-aspartate[c0] + (1) H+[c0] + (1) NADPH[c0]	ASPARTATE-SEMIALDEHYDE-DEHYDROGENASE-RXN.c	R_R02291_c	R02291_c
rxn01644_c0	(1) L-Aspartate 4-semialdehyde[c0] + (1) Pyruvate[c0] => (1) H+[c0] + (2) H2O[c0] + (1) L-2,3-Dihydrodipicolinate[c0]	DIHYDRODIPICSYN-RXN.c	R_R02292_c	R02292_c
rxn01649_c0	(1) Orthophosphate[c0] + (1) Xanthosine[c0] <=> (1) Xanthine[c0] + (1) alpha-D-Ribose 1-phosphate[c0]	XANTHOSINEPHOSPHORY-RXN.c	R_R02297_c	R02297_c
rxn01652_c0	(1) Folinic acid[c0] + (1) H+[c0] <=> (1) 5,10-Methenyltetrahydrofolate[c0] + (1) H2O[c0]		R_R02300_c	R02300_c
rxn01653_c0	(1) ATP[c0] + (1) Folinic acid[c0] => (1) 5,10-Methenyltetrahydrofolate[c0] + (1) ADP[c0] + (1) Orthophosphate[c0]	5-FORMYL-THF-CYCLO-LIGASE-RXN.c	R_R02301_c	R02301_c
rxn01659_c0	(1) trans,trans-Farnesyl diphosphate[c0] => (1) Abscisate[c0] + (1) Diphosphate[c0]
rxn01661_c0	(1) trans,trans-Farnesyl diphosphate[c0] => (1) Diphosphate[c0] + (1) H+[c0] + (1) delta-Cadinene[c0]	4.6.1.11-RXN.c
rxn01662_c0	(1) H2O[c0] + (1) N6-(L-1,3-Dicarboxypropyl)-L-lysine[c0] + (1) NAD+[c0] <=> (1) H+[c0] + (1) L-2-Aminoadipate 6-semialdehyde[c0] + (1) L-Glutamate[c0] + (1) NADH[c0]	1.5.1.9-RXN.c	R_R02313_c	R02313_c
rxn01664_c0	(1) (S)-2,3,4,5-Tetrahydropyridine-2-carboxylate[c0] + (1) H+[c0] + (1) H2O[c0] <= (1) L-2-Aminoadipate 6-semialdehyde[c0]	RXN-8173.c
rxn01667_c0	(1) Nucleoside triphosphate[c0] + (1) Pyruvate[c0] => (2) H+[c0] + (1) NDP[c0] + (1) Phosphoenolpyruvate[c0]		R_R02320_c	R02320_c
rxn01667_d0	(1) Nucleoside triphosphate[d0] + (1) Pyruvate[d0] => (2) H+[d0] + (1) NDP[d0] + (1) Phosphoenolpyruvate[d0]		R_R02320_c	R02320_c
rxn01670_c0	(1) H2O[c0] + (1) Nicotinamide D-ribonucleotide[c0] <=> (1) Nicotinamide-beta-riboside[c0] + (1) Orthophosphate[c0]	RXN-5841.c	R_R02323_c	R02323_c
rxn01670_d0	(1) H2O[d0] + (1) Nicotinamide D-ribonucleotide[d0] <=> (1) Nicotinamide-beta-riboside[d0] + (1) Orthophosphate[d0]	RXN-5841.c	R_R02323_c	R02323_c
rxn01672_c0	(1) H+[c0] + (1) H2O[c0] + (1) dCTP[c0] => (1) NH3[c0] + (1) dUTP[c0]	DCTP-DEAM-RXN.c
rxn01673_c0	(1) ATP[c0] + (1) dCDP[c0] <=> (1) ADP[c0] + (1) dCTP[c0]	DCDPKIN-RXN.c	R_R02326_c	R02326_c
rxn01673_x0	(1) ATP[x0] + (1) dCDP[x0] <=> (1) ADP[x0] + (1) dCTP[x0]	DCDPKIN-RXN.c	R_R02326_c	R02326_c
rxn01674_c0	(1) Uridine[c0] + (1) dCTP[c0] => (1) H+[c0] + (1) UMP[c0] + (1) dCDP[c0]		R_R02327_c	R02327_c
rxn01674_d0	(1) Uridine[d0] + (1) dCTP[d0] => (1) H+[d0] + (1) UMP[d0] + (1) dCDP[d0]		R_R02327_c	R02327_c
rxn01675_c0	(1) D-Glucose 1-phosphate[c0] + (1) dTTP[c0] <=> (1) Diphosphate[c0] + (1) dTDP-glucose[c0]	DTDPGLUCOSEPP-RXN.c
rxn01676_c0	(1) alpha-D-Galactose 1-phosphate[c0] + (1) dTTP[c0] => (1) Diphosphate[c0] + (1) dTDP-galactose[c0]
rxn01677_c0	(1) H2O[c0] + (1) dUTP[c0] => (1) H+[c0] + (1) Orthophosphate[c0] + (1) dUDP[c0]	NUCLEOSIDE-TRIPHOSPHATASE-RXN.c.araexp.DUDP_DUTP
rxn01677_g0	(1) H2O[g0] + (1) dUTP[g0] => (1) H+[g0] + (1) Orthophosphate[g0] + (1) dUDP[g0]	NUCLEOSIDE-TRIPHOSPHATASE-RXN.c.araexp.DUDP_DUTP
rxn01678_c0	(1) ATP[c0] + (1) dUDP[c0] <=> (1) ADP[c0] + (1) dUTP[c0]	DUDPKIN-RXN.c	R_R02331_c	R02331_c
rxn01678_x0	(1) ATP[x0] + (1) dUDP[x0] <=> (1) ADP[x0] + (1) dUTP[x0]	DUDPKIN-RXN.c	R_R02331_c	R02331_c
rxn01679_c0	(1) Uridine[c0] + (1) dUTP[c0] => (1) H+[c0] + (1) UMP[c0] + (1) dUDP[c0]		R_R02332_c	R02332_c
rxn01679_d0	(1) Uridine[d0] + (1) dUTP[d0] => (1) H+[d0] + (1) UMP[d0] + (1) dUDP[d0]		R_R02332_c	R02332_c
rxn01682_c0	(1) Indoleglycerol phosphate[c0] <=> (1) D-Glyceraldehyde 3-phosphate[c0] + (1) Indole[c0]		R_R02340_c	R02340_c
rxn01692_c0	(1) Estradiol-17beta[c0] + (1) NAD+[c0] <=> (1) Estrone[c0] + (1) H+[c0] + (1) NADH[c0]	ESTRADIOL-17-BETA-DEHYDROGENASE-RXN.c.araexp.NAD_NADH
rxn01692_d0	(1) Estradiol-17beta[d0] + (1) NAD+[d0] <=> (1) Estrone[d0] + (1) H+[d0] + (1) NADH[d0]	ESTRADIOL-17-BETA-DEHYDROGENASE-RXN.c.araexp.NAD_NADH
rxn01693_c0	(1) Estradiol-17beta[c0] + (1) NADP+[c0] <=> (1) Estrone[c0] + (1) H+[c0] + (1) NADPH[c0]	ESTRADIOL-17-BETA-DEHYDROGENASE-RXN.c.araexp.NADP_NADPH|RXN-12084.c
rxn01693_d0	(1) Estradiol-17beta[d0] + (1) NADP+[d0] <=> (1) Estrone[d0] + (1) H+[d0] + (1) NADPH[d0]	ESTRADIOL-17-BETA-DEHYDROGENASE-RXN.c.araexp.NADP_NADPH|RXN-12084.c
rxn01701_c0	(1) Palmitoyl-CoA[c0] + (1) Retinol[c0] => (1) CoA[c0] + (1) Retinyl palmitate[c0]
rxn01701_r0	(1) Palmitoyl-CoA[r0] + (1) Retinol[r0] <=> (1) CoA[r0] + (1) Retinyl palmitate[r0]
rxn01702_c0	(1) H2O[c0] + (1) Retinyl palmitate[c0] <=> (1) H+[c0] + (1) Hexadecanoic acid[c0] + (1) Retinol[c0]	3.1.1.64-RXN.c
rxn01702_r0	(1) H2O[r0] + (1) Retinyl palmitate[r0] <=> (1) H+[r0] + (1) Hexadecanoic acid[r0] + (1) Retinol[r0]	3.1.1.64-RXN.c
rxn01702_v0	(1) H2O[v0] + (1) Retinyl palmitate[v0] <=> (1) H+[v0] + (1) Hexadecanoic acid[v0] + (1) Retinol[v0]	3.1.1.64-RXN.c
rxn01705_c0	(1) Cytidine[c0] + (1) dCTP[c0] => (1) CMP[c0] + (1) H+[c0] + (1) dCDP[c0]		R_R02371_c	R02371_c
rxn01705_d0	(1) Cytidine[d0] + (1) dCTP[d0] => (1) CMP[d0] + (1) H+[d0] + (1) dCDP[d0]		R_R02371_c	R02371_c
rxn01706_c0	(1) Cytidine[c0] + (1) dUTP[c0] => (1) CMP[c0] + (1) H+[c0] + (1) dUDP[c0]		R_R02372_c	R02372_c
rxn01706_d0	(1) Cytidine[d0] + (1) dUTP[d0] => (1) CMP[d0] + (1) H+[d0] + (1) dUDP[d0]		R_R02372_c	R02372_c
rxn01710_c0	(1) NAD+[c0] + (1) Propane-1-ol[c0] <=> (1) H+[c0] + (1) NADH[c0] + (1) Propanal[c0]	RXN-13198.c
rxn01710_n0	(1) NAD+[n0] + (1) Propane-1-ol[n0] <=> (1) H+[n0] + (1) NADH[n0] + (1) Propanal[n0]	RXN-13198.c
rxn01711_c0	(1) L-Serine[c0] + (1) Pyrazole[c0] <= (1) 3-(Pyrazol-1-yl)-L-alanine[c0] + (1) H2O[c0]
rxn01712_c0	(1) 5-Hydroxyferulic acid methyl ester[c0] + (1) S-Adenosyl-L-methionine[c0] <=> (1) H+[c0] + (1) S-Adenosyl-L-homocysteine[c0] + (1) Sinapate[c0]	RXN-3422.c	R_R02379_c	R02379_c
rxn01713_c0	(1) H+[c0] + (1) Sinapate[c0] + (1) UDP-glucose[c0] => (1) 1-O-Sinapoyl-beta-D-glucose[c0] + (1) UDP[c0]	SINAPATE-1-GLUCOSYLTRANSFERASE-RXN.c.araexp.CPD-12575		R02380_c
rxn01714_c0	(1) H2O[c0] + (1) Sinapine[c0] <=> (1) Choline[c0] + (1) H+[c0] + (1) Sinapate[c0]	SINAPINE-ESTERASE-RXN.c
rxn01715_c0	(1) H2O[c0] + (1) Oxygen[c0] + (1) Tyramine[c0] => (1) 4-Hydroxyphenylacetaldehyde[c0] + (1) Hydrogen peroxide[c0] + (1) NH3[c0]		R_R02382_c	R02382_c
rxn01715_x0	(1) H2O[x0] + (1) Oxygen[x0] + (1) Tyramine[x0] => (1) 4-Hydroxyphenylacetaldehyde[x0] + (1) Hydrogen peroxide[x0] + (1) NH3[x0]		R_R02382_c	R02382_c
rxn01718_c0	(1) Feruloyl-CoA[c0] + (1) Tyramine[c0] => (1) CoA[c0] + (1) H+[c0] + (1) N-Feruloyltyramine[c0]	TYRAMINE-N-FERULOYLTRANSFERASE-RXN.c
rxn01724_c0	(2) Bilirubin[c0] + (1) Oxygen[c0] => (2) Biliverdin[c0] + (2) H2O[c0]	BILIRUBIN-OXIDASE-RXN.c
rxn01732_c0	(1) CoA[c0] + (1) GTP[c0] + (1) Itaconate[c0] <=> (1) GDP[c0] + (1) Itaconyl-CoA[c0] + (1) Orthophosphate[c0]	RXN-8988.c
rxn01732_m0	(1) CoA[m0] + (1) GTP[m0] + (1) Itaconate[m0] <=> (1) GDP[m0] + (1) Itaconyl-CoA[m0] + (1) Orthophosphate[m0]	RXN-8988.c
rxn01734_c0	(1) Itaconate[c0] + (1) Succinyl-CoA[c0] <= (1) Itaconyl-CoA[c0] + (1) Succinate[c0]
rxn01735_c0	(1) H2O[c0] + (1) L-Cystine[c0] <=> (1) NH3[c0] + (1) Pyruvate[c0] + (1) Thiocysteine[c0]		R_R02408_c	R02408_c
rxn01735_d0	(1) H2O[d0] + (1) L-Cystine[d0] <=> (1) NH3[d0] + (1) Pyruvate[d0] + (1) Thiocysteine[d0]		R_R02408_c	R02408_c
rxn01737_c0	(1) H2O[c0] + (1) Raffinose[c0] => (1) D-Fructose[c0] + (1) Melibiose[c0]		R_R02410_c	R02410_c
rxn01737_w0	(1) H2O[w0] + (1) Raffinose[w0] => (1) D-Fructose[w0] + (1) Melibiose[w0]		R_R02410_c	R02410_c
rxn01738_c0	(1) Sucrose[c0] + (1) alpha-D-Galactosyl-(1->3)-1D-myo-inositol[c0] <=> (1) Raffinose[c0] + (1) myo-Inositol[c0]	2.4.1.82-RXN.c	R_R02411_c	R02411_c
rxn01739_c0	(1) ATP[c0] + (1) Shikimate[c0] => (1) ADP[c0] + (1) H+[c0] + (1) Shikimate 3-phosphate[c0]	SHIKIMATE-KINASE-RXN.c	R_R02412_c	R02412_c
rxn01740_c0	(1) NADP+[c0] + (1) Shikimate[c0] <=> (1) 3-Dehydroshikimate[c0] + (1) H+[c0] + (1) NADPH[c0]	RXN-7968.c.araexp.NADP_NADPH|SHIKIMATE-5-DEHYDROGENASE-RXN.c	R_R02413_c	R02413_c
rxn01743_c0	(1) Shikimate[c0] + (1) p-Coumaroyl-CoA[c0] => (1) 4-Coumaroylshikimate[c0] + (1) CoA[c0]	2.3.1.133-RXN.c
rxn01746_c0	(1) Allantoate[c0] + (1) H2O[c0] <=> (1) (-)-Ureidoglycolate[c0] + (1) Urea[c0]	ALLANTOICASE-RXN.c	R_R02422_c	R02422_c
rxn01747_c0	(1) Allantoate[c0] + (2) H+[c0] + (1) H2O[c0] => (1) (S)-Ureidoglycine[c0] + (1) CO2[c0] + (1) NH3[c0]	ALLANTOATE-DEIMINASE-RXN.c
rxn01748_c0	(1) Allantoin[c0] + (1) H2O[c0] => (1) Allantoate[c0]
rxn01757_c0	(1) 2-Oxoglutarate[c0] + (1) L-Cysteate[c0] <=> (1) 3-Sulfopyruvate[c0] + (1) L-Glutamate[c0]	RXN-11737.c	R_R02433_c
rxn01763_c0	(1) ATP[c0] + (1) L-Ribulose[c0] => (1) ADP[c0] + (1) H+[c0] + (1) L-Ribulose 5-phosphate[c0]	RIBULOKIN-RXN.c.araexp.L-RIBULOSE_L-RIBULOSE-5-P|RXN0-5116.c
rxn01765_c0	(1) H+[c0] + (1) NADPH[c0] + (1) Naringenin[c0] + (1) Oxygen[c0] => (1) Eriodictyol[c0] + (1) H2O[c0] + (1) NADP+[c0]		R_R02442_c	R02442_c
rxn01767_c0	(1) 2-Oxoglutarate[c0] + (1) Naringenin[c0] + (1) Oxygen[c0] => (1) CO2[c0] + (1) Dihydrokaempferol[c0] + (1) Succinate[c0]	NARINGENIN-3-DIOXYGENASE-RXN.c	R_R02444_c	R02444_c
rxn01769_c0	(1) Naringenin[c0] <= (1) Naringenin chalcone[c0]	CHALCONE-ISOMERASE-RXN.c.araexp.APIGENIN_NARINGENIN-CMPD	R_R02446_c	R02446_c
rxn01769_n0	(1) Naringenin[n0] <= (1) Naringenin chalcone[n0]	CHALCONE-ISOMERASE-RXN.c.araexp.APIGENIN_NARINGENIN-CMPD	R_R02446_c	R02446_c
rxn01769_r0	(1) Naringenin[r0] <= (1) Naringenin chalcone[r0]	CHALCONE-ISOMERASE-RXN.c.araexp.APIGENIN_NARINGENIN-CMPD	R_R02446_c	R02446_c
rxn01774_c0	(1) Anthranilate[c0] + (1) S-Benzoate coenzyme A[c0] => (1) CoA[c0] + (1) N-Benzoylanthranilate[c0]	ANTHRANILATE-N-BENZOYLTRANSFERASE-RXN.c
rxn01781_c0	(1) 1-Hexadecanol[c0] + (1) NAD+[c0] <= (1) H+[c0] + (1) Hexadecanal[c0] + (1) NADH[c0]
rxn01782_c0	(1) Hexadecanal[c0] + (1) NADP+[c0] <= (1) H+[c0] + (1) Hexadecenal[c0] + (1) NADPH[c0]	2-HEXADECENAL-REDUCTASE-RXN.c
rxn01782_n0	(1) Hexadecanal[n0] + (1) NADP+[n0] <= (1) H+[n0] + (1) Hexadecenal[n0] + (1) NADPH[n0]	2-HEXADECENAL-REDUCTASE-RXN.c
rxn01783_c0	(1) Sphinganine 1-phosphate[c0] <=> (1) Ethanolamine phosphate[c0] + (1) Hexadecanal[c0]	SPHINGANINE-1-PHOSPHATE-ALDOLASE-RXN.c	R_R02464_c	R02464_c
rxn01784_c0	(1) 3-Sulfino-L-alanine[c0] + (1) H+[c0] <=> (1) CO2[c0] + (1) Hypotaurine[c0]		R_R02466_c	R02466_c
rxn01785_c0	(1) Cysteamine[c0] + (1) Oxygen[c0] <=> (1) H+[c0] + (1) Hypotaurine[c0]
rxn01790_c0	(1) (R)-Pantoate[c0] + (1) NADP+[c0] <=> (1) 2-Dehydropantoate[c0] + (1) H+[c0] + (1) NADPH[c0]	2-DEHYDROPANTOATE-REDUCT-RXN.c
rxn01791_c0	(1) (R)-Pantoate[c0] + (1) ATP[c0] + (1) beta-Alanine[c0] => (1) AMP[c0] + (1) Diphosphate[c0] + (2) H+[c0] + (1) Pantothenate[c0]	PANTOATE-BETA-ALANINE-LIG-RXN.c	R_R02473_c	R02473_c
rxn01800_c0	(1) Deoxycytidine[c0] + (1) H+[c0] + (1) H2O[c0] => (1) Deoxyuridine[c0] + (1) NH3[c0]	CYTIDEAM-RXN.c	R_R02485_c	R02485_c
rxn01807_c0	(1) ATP[c0] + (1) Pyridoxamine[c0] => (1) ADP[c0] + (1) H+[c0] + (1) Pyridoxamine phosphate[c0]	PYRAMKIN-RXN.c	R_R02493_c	R02493_c
rxn01815_c0	(1) Cinnamaldehyde[c0] + (1) CoA[c0] + (1) NADP+[c0] <=> (1) Cinnamoyl-CoA[c0] + (1) H+[c0] + (1) NADPH[c0]	CINNAMOYL-COA-REDUCTASE-RXN.c		R02506_c
rxn01816_c0	(1) Cystathionine[c0] + (1) H+[c0] + (1) Succinate[c0] <=> (1) L-Cysteine[c0] + (1) O-Succinyl-L-homoserine[c0]
rxn01825_c0	(1) Homogentisate[c0] + (1) Oxygen[c0] => (1) 4-Maleylacetoacetate[c0] + (1) H+[c0]	HOMOGENTISATE-12-DIOXYGENASE-RXN.c	R_R02519_c	R02519_c
rxn01827_c0	(1) 3-(4-Hydroxyphenyl)pyruvate[c0] + (1) Oxygen[c0] => (1) CO2[c0] + (1) Homogentisate[c0]	4-HYDROXYPHENYLPYRUVATE-DIOXYGENASE-RXN.c	R_R02521_c	R02521_c
rxn01831_c0	(1) (R)-Lactaldehyde[c0] + (1) NAD+[c0] <=> (1) H+[c0] + (1) Methylglyoxal[c0] + (1) NADH[c0]	D-LACTALDEHYDE-DEHYDROGENASE-RXN.c
rxn01832_c0	(1) H+[c0] + (1) Methylglyoxal[c0] + (1) NADPH[c0] <=> (1) Hydroxyacetone[c0] + (1) NADP+[c0]	RXN0-4281.c
rxn01833_c0	(1) Aminoacetone[c0] + (1) H2O[c0] + (1) Oxygen[c0] => (1) Hydrogen peroxide[c0] + (1) Methylglyoxal[c0] + (1) NH3[c0]	AMACETOXID-RXN.c	R_R02529_c	R02529_c
rxn01833_d0	(1) Aminoacetone[d0] + (1) H2O[d0] + (1) Oxygen[d0] => (1) Hydrogen peroxide[d0] + (1) Methylglyoxal[d0] + (1) NH3[d0]	AMACETOXID-RXN.c	R_R02529_c	R02529_c
rxn01834_c0	(1) (R)-S-Lactoylglutathione[c0] <=> (1) Glutathione[c0] + (1) Methylglyoxal[c0]	GLYOXI-RXN.c	R_R02530_c	R02530_c
rxn01834_x0	(1) (R)-S-Lactoylglutathione[x0] <=> (1) Glutathione[x0] + (1) Methylglyoxal[x0]	GLYOXI-RXN.c	R_R02530_c	R02530_c
rxn01839_c0	(1) Ascorbate[c0] + (1) Dopamine[c0] + (1) Oxygen[c0] => (1) Dehydroascorbate[c0] + (1) H2O[c0] + (1) L-Noradrenaline[c0]	DOPAMINE-BETA-MONOOXYGENASE-RXN.c
rxn01840_c0	(1) H2O[c0] + (1) NAD+[c0] + (1) Phenylacetaldehyde[c0] <=> (2) H+[c0] + (1) NADH[c0] + (1) Phenylacetic acid[c0]	PHENDEHYD-RXN.c
rxn01847_c0	(1) NAD+[c0] + (1) meso-Tartaric acid[c0] <=> (1) 2-Hydroxy-3-oxosuccinate[c0] + (1) H+[c0] + (1) NADH[c0]	RXN-8643.c
rxn01848_c0	(1) (R,R)-Tartaric acid[c0] => (1) meso-Tartaric acid[c0]
rxn01850_c0	(1) (+)-Neomenthol[c0] + (1) NADP+[c0] <=> (1) (-)-Menthone[c0] + (1) H+[c0] + (1) NADPH[c0]	#NAME?
rxn01851_c0	(1) 4-Aminobutyraldehyde[c0] + (1) H2O[c0] + (1) NAD+[c0] <=> (1) 4-Aminobutanoate[c0] + (2) H+[c0] + (1) NADH[c0]			R02549_c
rxn01851_d0	(1) 4-Aminobutyraldehyde[d0] + (1) H2O[d0] + (1) NAD+[d0] <=> (1) 4-Aminobutanoate[d0] + (2) H+[d0] + (1) NADH[d0]			R02549_c
rxn01855_c0	(1) Cyclopentanol[c0] + (1) NAD+[c0] <=> (1) Cyclopentanone[c0] + (1) H+[c0] + (1) NADH[c0]	CYCLOPENTANOL-DEHYDROGENASE-RXN.c
rxn01855_d0	(1) Cyclopentanol[d0] + (1) NAD+[d0] <=> (1) Cyclopentanone[d0] + (1) H+[d0] + (1) NADH[d0]	CYCLOPENTANOL-DEHYDROGENASE-RXN.c
rxn01855_m0	(1) Cyclopentanol[m0] + (1) NAD+[m0] <=> (1) Cyclopentanone[m0] + (1) H+[m0] + (1) NADH[m0]	CYCLOPENTANOL-DEHYDROGENASE-RXN.c
rxn01858_c0	(1) Deoxyadenosine[c0] + (1) H+[c0] + (1) H2O[c0] <=> (1) Deoxyinosine[c0] + (1) NH3[c0]	ADDALT-RXN.c	R_R02556_c	R02556_c
rxn01867_c0	(1) Betaine aldehyde[c0] + (1) H2O[c0] + (1) NAD+[c0] <=> (1) Betaine[c0] + (2) H+[c0] + (1) NADH[c0]		R_R02565_c	R02565_c
rxn01868_c0	(1) Betaine aldehyde[c0] + (1) H2O[c0] + (1) NADP+[c0] <=> (1) Betaine[c0] + (2) H+[c0] + (1) NADPH[c0]		R_R02566_c	R02566_c
rxn01870_c0	(1) D-Fructose 1-phosphate[c0] <=> (1) D-Glyceraldehyde[c0] + (1) Glycerone phosphate[c0]		R_R02568_c	R02568_c
rxn01871_c0	(1) Acetyl-CoA[c0] + (1) Enzyme N6-(dihydrolipoyl)lysine[c0] <=> (1) CoA[c0] + (1) [Dihydrolipoyllysine-residue acetyltransferase] S-acetyldihydrolipoyllysine[c0]			R02569_c
rxn01871_d0	(1) Acetyl-CoA[d0] + (1) Enzyme N6-(dihydrolipoyl)lysine[d0] <=> (1) CoA[d0] + (1) [Dihydrolipoyllysine-residue acetyltransferase] S-acetyldihydrolipoyllysine[d0]			R02569_c
rxn01872_c0	(1) Enzyme N6-(dihydrolipoyl)lysine[c0] + (1) H+[c0] + (1) Succinyl-CoA[c0] <=> (1) CoA[c0] + (1) [Dihydrolipoyllysine-residue succinyltransferase] S-succinyldihydrolipoyllysine[c0]
rxn01880_c0	(1) NAD+[c0] + (1) Prostaglandin E2[c0] <=> (1) (5Z,13E)-11alpha-Hydroxy-9,15-dioxoprost-13-enoate[c0] + (1) H+[c0] + (1) NADH[c0]	1.1.1.141-RXN.c
rxn01880_x0	(1) NAD+[x0] + (1) Prostaglandin E2[x0] <=> (1) (5Z,13E)-11alpha-Hydroxy-9,15-dioxoprost-13-enoate[x0] + (1) H+[x0] + (1) NADH[x0]	1.1.1.141-RXN.c
rxn01881_c0	(1) NADP+[c0] + (1) Prostaglandin F2alpha[c0] <=> (1) H+[c0] + (1) NADPH[c0] + (1) Prostaglandin E2[c0]		R_R02581_c	R02581_c
rxn01885_c0	(1) CTP[c0] + (1) N-Trimethyl-2-aminoethylphosphonate[c0] <=> (1) CMP-N-trimethyl-2-aminoethylphosphonate[c0] + (1) Diphosphate[c0] + (1) H+[c0]
rxn01886_c0	(1) H2O[c0] + (1) sn-glycero-3-Phosphocholine[c0] <= (1) Choline phosphate[c0] + (1) Glycerol[c0] + (1) H+[c0]
rxn01887_c0	(1) Coniferyl alcohol[c0] + (1) NADP+[c0] <=> (1) Coniferyl aldehyde[c0] + (1) H+[c0] + (1) NADPH[c0]	RXN-11654.c|RXN-2602.c	R_R02593_c	R02593_c
rxn01887_w0	(1) Coniferyl alcohol[w0] + (1) NADP+[w0] <=> (1) Coniferyl aldehyde[w0] + (1) H+[w0] + (1) NADPH[w0]	RXN-11654.c|RXN-2602.c	R_R02593_c	R02593_c
rxn01888_c0	(1) Coniferyl alcohol[c0] + (1) UDP-glucose[c0] <=> (1) Coniferin[c0] + (1) UDP[c0]	2.4.1.111-RXN.c.araexp.CPD-12575		R02594_c
rxn01902_c0	(1) NAD+[c0] + (1) Phenylethyl alcohol[c0] <=> (1) H+[c0] + (1) NADH[c0] + (1) Phenylacetaldehyde[c0]	RXN-7700.c
rxn01903_c0	(1) H2O[c0] + (1) Oxygen[c0] + (1) Phenethylamine[c0] => (1) Hydrogen peroxide[c0] + (1) NH3[c0] + (1) Phenylacetaldehyde[c0]	AMINEPHEN-RXN.c	R_R02613_c	R02613_c
rxn01903_d0	(1) H2O[d0] + (1) Oxygen[d0] + (1) Phenethylamine[d0] => (1) Hydrogen peroxide[d0] + (1) NH3[d0] + (1) Phenylacetaldehyde[d0]	AMINEPHEN-RXN.c	R_R02613_c	R02613_c
rxn01903_x0	(1) H2O[x0] + (1) Oxygen[x0] + (1) Phenethylamine[x0] => (1) Hydrogen peroxide[x0] + (1) NH3[x0] + (1) Phenylacetaldehyde[x0]	AMINEPHEN-RXN.c	R_R02613_c	R02613_c
rxn01906_c0	(1) 2-Oxoglutarate[c0] + (1) 3-Sulfino-L-alanine[c0] <=> (1) 3-Sulfinylpyruvate[c0] + (1) L-Glutamate[c0]	3-SULFINOALANINE-AMINOTRANSFERASE-RXN.c	R_R02619_c
rxn01907_c0	(1) 3'-Phosphoadenylyl sulfate[c0] + (1) Quercetin 3-sulfate[c0] <=> (1) Adenosine 3',5'-bisphosphate[c0] + (1) H+[c0] + (1) Quercetin 3,3'-bissulfate[c0]	2.8.2.26-RXN.c
rxn01908_c0	(1) 3'-Phosphoadenylyl sulfate[c0] + (1) Quercetin 3-sulfate[c0] => (1) Adenosine 3',5'-bisphosphate[c0] + (1) H+[c0] + (1) Quercetin 3,4'-bissulfate[c0]	2.8.2.27-RXN.c
rxn01909_c0	(1) Diphosphate[c0] + (1) UDP-D-galacturonate[c0] <=> (1) 1-Phospho-alpha-D-galacturonate[c0] + (1) UTP[c0]	RXN-3.c
rxn01911_c0	(1) 3-Dehydro-L-gulonate[c0] + (1) NAD+[c0] <= (1) (4R,5S)-4,5,6-Trihydroxy-2,3-dioxohexanoate[c0] + (1) H+[c0] + (1) NADH[c0]
rxn01913_c0	(1) L-Gulonate[c0] + (1) NAD+[c0] <= (1) 3-Dehydro-L-gulonate[c0] + (1) H+[c0] + (1) NADH[c0]
rxn01917_c0	(1) ATP[c0] + (1) N-Acetyl-L-glutamate[c0] <=> (1) ADP[c0] + (1) N-Acetyl-L-glutamate 5-phosphate[c0]	ACETYLGLUTKIN-RXN.c	R_R02649_c	R02649_c
rxn01924_c0	(1) 2-Methylpropanoyl-CoA[c0] + (1) FAD[c0] + (1) H+[c0] <=> (1) 2-Methylprop-2-enoyl-CoA[c0] + (1) FADH2[c0]		R_R02661_c	R02661_c
rxn01925_c0	(1) 2-Methylpropanoyl-CoA[c0] + (1) Enzyme N6-(dihydrolipoyl)lysine[c0] <=> (1) CoA[c0] + (1) [Dihydrolipoyllysine-residue (2-methylpropanoyl)transferase] S-(2-methylpropanoyl)dihydrolipoyllysine[c0]
rxn01925_m0	(1) 2-Methylpropanoyl-CoA[m0] + (1) Enzyme N6-(dihydrolipoyl)lysine[m0] <=> (1) CoA[m0] + (1) [Dihydrolipoyllysine-residue (2-methylpropanoyl)transferase] S-(2-methylpropanoyl)dihydrolipoyllysine[m0]
rxn01926_c0	(1) 2-Phospho-D-glycerate[c0] + (1) ATP[c0] => (1) 2,3-Bisphospho-D-glycerate[c0] + (1) ADP[c0] + (1) H+[c0]
rxn01937_c0	(1) H2O[c0] + (1) Indole-3-acetaldehyde[c0] + (1) NAD+[c0] <=> (2) H+[c0] + (1) Indole-3-acetate[c0] + (1) NADH[c0]	RXN-10715.c	R_R02678_c	R02678_c
rxn01938_c0	(1) Indole-3-ethanol[c0] + (1) NAD+[c0] <=> (1) H+[c0] + (1) Indole-3-acetaldehyde[c0] + (1) NADH[c0]	1.1.1.190-RXN.c
rxn01939_c0	(1) Indole-3-ethanol[c0] + (1) NADP+[c0] <=> (1) H+[c0] + (1) Indole-3-acetaldehyde[c0] + (1) NADPH[c0]	RXN-10717.c
rxn01943_c0	(1) 4-Hydroxyphenylacetaldehyde[c0] + (1) H2O[c0] + (1) NAD+[c0] <= (1) 4-Hydroxyphenylacetate[c0] + (2) H+[c0] + (1) NADH[c0]
rxn01945_c0	(1) 4-Hydroxyphenylacetate[c0] + (1) H+[c0] + (1) NADH[c0] + (1) Oxygen[c0] <= (1) 3,4-Dihydroxyphenylacetate[c0] + (1) H2O[c0] + (1) NAD+[c0]
rxn01954_c0	(1) 4-Hydroxyphenylacetonitrile[c0] + (1) H+[c0] + (1) NADPH[c0] + (1) Oxygen[c0] => (1) (S)-4-Hydroxymandelonitrile[c0] + (1) H2O[c0] + (1) NADP+[c0]	1.14.13.42-RXN.c
rxn01961_c0	(1) H2O[c0] + (1) Xanthosine 5'-phosphate[c0] <=> (1) Orthophosphate[c0] + (1) Xanthosine[c0]	XMPXAN-RXN.c	R_R02719_c	R02719_c
rxn01961_d0	(1) H2O[d0] + (1) Xanthosine 5'-phosphate[d0] <=> (1) Orthophosphate[d0] + (1) Xanthosine[d0]	XMPXAN-RXN.c	R_R02719_c	R02719_c
rxn01962_c0	(1) H2O[c0] + (1) XTP[c0] => (1) Diphosphate[c0] + (2) H+[c0] + (1) Xanthosine 5'-phosphate[c0]		R_R02720_c	R02720_c
rxn01964_c0	(1) Indoleglycerol phosphate[c0] + (1) L-Serine[c0] <=> (1) D-Glyceraldehyde 3-phosphate[c0] + (1) H2O[c0] + (1) L-Tryptophan[c0]		R_R02722_c	R02722_c
rxn01965_c0	(1) Cholesterol[c0] + (1) H+[c0] + (1) NADPH[c0] + (1) Oxygen[c0] => (1) 22beta-Hydroxycholesterol[c0] + (1) H2O[c0] + (1) NADP+[c0]	RXN-7875.c
rxn01967_c0	(1) beta-D-Glucose 1-phosphate[c0] <=> (1) beta-D-Glucose 6-phosphate[c0]	BETA-PHOSPHOGLUCOMUTASE-RXN.c
rxn01971_c0	(1) ATP[c0] + (1) beta-D-Fructose 6-phosphate[c0] => (1) ADP[c0] + (1) H+[c0] + (1) beta-D-Fructose 2,6-bisphosphate[c0]	6-PHOSPHOFRUCTO-2-KINASE-RXN.c	R_R02732_c	R02732_c
rxn01974_c0	(1) LL-2,6-Diaminoheptanedioate[c0] <=> (1) meso-2,6-Diaminoheptanedioate[c0]	DIAMINOPIMEPIM-RXN.c	R_R02735_c	R02735_c
rxn01975_c0	(1) NADP+[c0] + (1) beta-D-Glucose 6-phosphate[c0] <=> (1) D-Glucono-1,5-lactone 6-phosphate[c0] + (1) H+[c0] + (1) NADPH[c0]	GLU6PDEHYDROG-RXN.c	R_R02736_c	R02736_c
rxn01977_c0	(1) alpha-D-Glucose 6-phosphate[c0] <=> (1) beta-D-Glucose 6-phosphate[c0]	GLUCOSE-6-PHOSPHATE-1-EPIMERASE-RXN.c	R_R02739_c	R02739_c
rxn01979_c0	(1) ATP[c0] + (1) beta-Alanine[c0] + (1) gamma-L-Glutamyl-L-cysteine[c0] => (1) ADP[c0] + (1) H+[c0] + (1) Orthophosphate[c0] + (1) gamma-L-Glutamyl-L-cysteinyl-beta-alanine[c0]	HOMOGLUTATHIONE-SYNTHASE-RXN.c
rxn01979_d0	(1) ATP[d0] + (1) beta-Alanine[d0] + (1) gamma-L-Glutamyl-L-cysteine[d0] => (1) ADP[d0] + (1) H+[d0] + (1) Orthophosphate[d0] + (1) gamma-L-Glutamyl-L-cysteinyl-beta-alanine[d0]	HOMOGLUTATHIONE-SYNTHASE-RXN.c
rxn01987_c0	(1) 2-Deoxy-D-ribose 5-phosphate[c0] + (1) ADP[c0] + (1) H+[c0] <= (1) ATP[c0] + (1) Deoxyribose[c0]		R_R02750_c	R02750_c
rxn01987_d0	(1) 2-Deoxy-D-ribose 5-phosphate[d0] + (1) ADP[d0] + (1) H+[d0] <= (1) ATP[d0] + (1) Deoxyribose[d0]		R_R02750_c	R02750_c
rxn01989_c0	(1) D-Glucarate[c0] => (1) 5-Dehydro-4-deoxy-D-glucarate[c0] + (1) H2O[c0]
rxn01991_c0	(1) H2O[c0] + (1) NADP+[c0] + (1) meso-2,6-Diaminoheptanedioate[c0] <= (1) H+[c0] + (1) L-2-Amino-6-oxoheptanedioate[c0] + (1) NADPH[c0] + (1) NH3[c0]
rxn01997_c0	(1) dTDP-glucose[c0] => (1) 4,6-Dideoxy-4-oxo-dTDP-D-glucose[c0] + (1) H2O[c0]	DTDPGLUCDEHYDRAT-RXN.c	R_R02771_c|R_R06513_c	R02771_c|R06513_c
rxn02004_c0	(1) H2O[c0] + (1) alpha,alpha'-Trehalose 6-phosphate[c0] <=> (1) Orthophosphate[c0] + (1) alpha,alpha-Trehalose[c0]		R_R02778_c	R02778_c
rxn02004_n0	(1) H2O[n0] + (1) alpha,alpha'-Trehalose 6-phosphate[n0] <=> (1) Orthophosphate[n0] + (1) alpha,alpha-Trehalose[n0]		R_R02778_c	R02778_c
rxn02004_x0	(1) H2O[x0] + (1) alpha,alpha'-Trehalose 6-phosphate[x0] <=> (1) Orthophosphate[x0] + (1) alpha,alpha-Trehalose[x0]		R_R02778_c	R02778_c
rxn02009_c0	(1) ATP[c0] + (1) L-Lysine[c0] + (1) UDP-N-acetylmuramoyl-L-alanyl-D-glutamate[c0] => (1) ADP[c0] + (1) H+[c0] + (1) Orthophosphate[c0] + (1) UDP-N-acetylmuramoyl-L-alanyl-gamma-D-glutamyl-L-lysine[c0]	6.3.2.7-RXN.c
rxn02009_d0	(1) ATP[d0] + (1) L-Lysine[d0] + (1) UDP-N-acetylmuramoyl-L-alanyl-D-glutamate[d0] => (1) ADP[d0] + (1) H+[d0] + (1) Orthophosphate[d0] + (1) UDP-N-acetylmuramoyl-L-alanyl-gamma-D-glutamyl-L-lysine[d0]	6.3.2.7-RXN.c
rxn02011_c0	(1) ATP[c0] + (1) UDP-N-acetylmuramoyl-L-alanyl-D-glutamate[c0] + (1) meso-2,6-Diaminoheptanedioate[c0] => (1) ADP[c0] + (1) H+[c0] + (1) Orthophosphate[c0] + (1) UDP-N-acetylmuramoyl-L-alanyl-D-gamma-glutamyl-meso-2,6-diaminopimelate[c0]	UDP-NACMURALGLDAPLIG-RXN.c
rxn02014_c0	(1) ATP[c0] + (1) Cholic acid[c0] + (1) CoA[c0] => (1) AMP[c0] + (1) Choloyl-CoA[c0] + (1) Diphosphate[c0] + (1) H+[c0]
rxn02022_c0	(2) H+[c0] + (1) Hydrogen peroxide[c0] + (2) Iodide[c0] <=> (2) H2O[c0] + (1) Iodine[c0]	IODIDE-PEROXIDASE-RXN.c
rxn02022_d0	(2) H+[d0] + (1) Hydrogen peroxide[d0] + (2) Iodide[d0] <=> (2) H2O[d0] + (1) Iodine[d0]	IODIDE-PEROXIDASE-RXN.c
rxn02033_c0	(1) NADP+[c0] + (1) Tropine[c0] <=> (1) H+[c0] + (1) NADPH[c0] + (1) Tropinone[c0]	TROPINE-DEHYDROGENASE-RXN.c	R_R02832_c	R02832_c
rxn02034_c0	(1) Cortisol[c0] + (1) NAD+[c0] <=> (1) Cortisone[c0] + (1) H+[c0] + (1) NADH[c0]		R_R02834_c	R02834_c
rxn02035_c0	(1) Cortisol[c0] + (1) NADP+[c0] <=> (1) Cortisone[c0] + (1) H+[c0] + (1) NADPH[c0]	RXN-12085.c		R02836_c
rxn02061_c0	(1) S-Adenosylmethioninamine[c0] + (1) Spermidine[c0] <=> (1) 5'-Methylthioadenosine[c0] + (1) H+[c0] + (1) Spermine[c0]	SPERMINE-SYNTHASE-RXN.c	R_R02869_c	R02869_c
rxn02062_c0	(1) NADPH[c0] + (1) Presqualene diphosphate[c0] => (1) Diphosphate[c0] + (1) NADP+[c0] + (1) Squalene[c0]	RXN66-281.c|RXN66-281.c.araexp.NADP_NADPH	R_R02872_c	R02872_c
rxn02063_c0	(1) H+[c0] + (1) NADPH[c0] + (1) Oxygen[c0] + (1) Squalene[c0] => (1) (S)-2,3-Epoxysqualene[c0] + (1) H2O[c0] + (1) NADP+[c0]	RXN66-282.c|SQUALENE-MONOOXYGENASE-RXN.c	R_R02874_c	R02874_c
rxn02068_c0	(1) Bergaptol[c0] + (1) S-Adenosyl-L-methionine[c0] <=> (1) Bergapten[c0] + (1) S-Adenosyl-L-homocysteine[c0]	2.1.1.69-RXN.c
rxn02079_c0	(1) NADP+[c0] + (1) Scytalone[c0] => (1) 1,3,6,8-Naphthalenetetrol[c0] + (1) H+[c0] + (1) NADPH[c0]	1.1.1.252-RXN.c
rxn02098_c0	(1) Genistein[c0] + (1) S-Adenosyl-L-methionine[c0] <=> (1) Biochanin A[c0] + (1) H+[c0] + (1) S-Adenosyl-L-homocysteine[c0]	RXN-3645.c
rxn02106_c0	(1) 2-Propynal[c0] + (1) H2O[c0] + (1) NAD+[c0] <=> (2) H+[c0] + (1) NADH[c0] + (1) Propynoate[c0]		R_R02940_c	R02940_c
rxn02107_c0	(1) H2O[c0] + (1) NAD+[c0] + (1) Salicylaldehyde[c0] <=> (2) H+[c0] + (1) NADH[c0] + (1) Salicylate[c0]	1.2.1.65-RXN.c
rxn02112_c0	(1) (R,R)-Butane-2,3-diol[c0] + (1) NAD+[c0] <=> (1) (R)-Acetoin[c0] + (1) H+[c0] + (1) NADH[c0]		R_R02946_c	R02946_c
rxn02112_d0	(1) (R,R)-Butane-2,3-diol[d0] + (1) NAD+[d0] <=> (1) (R)-Acetoin[d0] + (1) H+[d0] + (1) NADH[d0]		R_R02946_c	R02946_c
rxn02122_c0	(1) D-Glucuronolactone[c0] + (2) H2O[c0] + (1) NAD+[c0] => (1) D-Glucarate[c0] + (3) H+[c0] + (1) NADH[c0]		R_R02957_c	R02957_c
rxn02128_c0	(1) ATP[c0] + (1) Pantetheine[c0] <=> (1) ADP[c0] + (1) H+[c0] + (1) Pantetheine 4'-phosphate[c0]
rxn02129_c0	(1) H+[c0] + (1) N-((R)-Pantothenoyl)-L-cysteine[c0] <= (1) CO2[c0] + (1) Pantetheine[c0]
rxn02130_c0	(1) H2O[c0] + (1) Pantetheine[c0] => (1) Cysteamine[c0] + (1) Pantothenate[c0]
rxn02133_c0	(1) ATP[c0] + (1) Sphinganine[c0] <=> (1) ADP[c0] + (1) H+[c0] + (1) Sphinganine 1-phosphate[c0]	RXN-11376.c.araexp.CPD-13612_CPD-649|SPHINGANINE-KINASE-RXN.c
rxn02134_c0	(1) NADP+[c0] + (1) Sphinganine[c0] <=> (1) 3-Dehydrosphinganine[c0] + (1) H+[c0] + (1) NADPH[c0]		R_R02978_c	R02978_c
rxn02135_c0	(1) FAD[c0] + (1) H+[c0] + (1) Sphinganine[c0] => (1) FADH2[c0] + (1) Sphingosine[c0]			R02979_c
rxn02138_c0	(1) dTDP-glucose[c0] <=> (1) dTDP-galactose[c0]		R_R02984_c	R02984_c
rxn02138_g0	(1) dTDP-glucose[g0] <=> (1) dTDP-galactose[g0]		R_R02984_c	R02984_c
rxn02154_c0	(1) Deamino-NAD+[c0] + (1) H2O[c0] => (1) AMP[c0] + (2) H+[c0] + (1) Nicotinate D-ribonucleotide[c0]
rxn02154_d0	(1) Deamino-NAD+[d0] + (1) H2O[d0] => (1) AMP[d0] + (2) H+[d0] + (1) Nicotinate D-ribonucleotide[d0]
rxn02155_c0	(1) ATP[c0] + (1) Nicotinate D-ribonucleotide[c0] <=> (1) Deamino-NAD+[c0] + (1) Diphosphate[c0]	NICONUCADENYLYLTRAN-RXN.c
rxn02157_c0	(1) 2-Oxoglutarate[c0] + (1) Gibberellin A1[c0] + (1) Oxygen[c0] => (1) CO2[c0] + (1) Gibberellin A8[c0] + (1) Succinate[c0]		R_R03008_c	R03008_c
rxn02159_c0	(1) L-Histidinol[c0] + (1) NAD+[c0] <=> (1) H+[c0] + (1) L-Histidinal[c0] + (1) NADH[c0]	HISTOLDEHYD-RXN.c	R_R03012_c	R03012_c
rxn02160_c0	(1) H2O[c0] + (1) L-Histidinol phosphate[c0] <=> (1) L-Histidinol[c0] + (1) Orthophosphate[c0]		R_R03013_c	R03013_c
rxn02166_c0	(1) 4-Nitrophenyl phosphate[c0] + (1) H2O[c0] <=> (1) 4-Nitrophenol[c0] + (1) Orthophosphate[c0]	4-NITROPHENYLPHOSPHATASE-RXN.c	R_R03024_c	R03024_c
rxn02167_c0	(1) (S)-3-Hydroxybutanoyl-CoA[c0] <=> (1) Crotonoyl-CoA[c0] + (1) H2O[c0]
rxn02169_c0	(1) Glutaconyl-1-CoA[c0] + (1) H+[c0] => (1) CO2[c0] + (1) Crotonoyl-CoA[c0]	GLUTACONYL-COA-DECARBOXYLASE-RXN.c
rxn02175_c0	(1) ATP[c0] + (1) Pantetheine 4'-phosphate[c0] <=> (1) Dephospho-CoA[c0] + (1) Diphosphate[c0]	PANTEPADENYLYLTRAN-RXN.c
rxn02181_c0	(1) 3-Hydroxypropionyl-CoA[c0] <=> (1) H2O[c0] + (1) Propenoyl-CoA[c0]	RXN-6383.c	R_R03045_c	R03045_c
rxn02181_v0	(1) 3-Hydroxypropionyl-CoA[v0] <=> (1) H2O[v0] + (1) Propenoyl-CoA[v0]	RXN-6383.c	R_R03045_c	R03045_c
rxn02184_c0	(1) 11-cis-Retinyl palmitate[c0] + (1) H2O[c0] => (1) 11-cis-Retinol[c0] + (1) H+[c0] + (1) Hexadecanoic acid[c0]
rxn02185_c0	(1) 2-Acetolactate[c0] + (1) Thiamin diphosphate[c0] <=> (1) 2-(alpha-Hydroxyethyl)thiamine diphosphate[c0] + (1) Pyruvate[c0]		R_R03050_c	R03050_c
rxn02186_c0	(1) 2-Acetolactate[c0] + (1) H+[c0] + (1) NADPH[c0] <=> (1) 2,3-Dihydroxy-3-methylbutanoate[c0] + (1) NADP+[c0]		R_R03051_c	R03051_c
rxn02189_c0	(1) Cinnamaldehyde[c0] + (1) H+[c0] + (1) NADPH[c0] <=> (1) Cinnamyl alcohol[c0] + (1) NADP+[c0]	CINNAMYL-ALCOHOL-DEHYDROGENASE-RXN.c
rxn02189_w0	(1) Cinnamaldehyde[w0] + (1) H+[w0] + (1) NADPH[w0] <=> (1) Cinnamyl alcohol[w0] + (1) NADP+[w0]	CINNAMYL-ALCOHOL-DEHYDROGENASE-RXN.c
rxn02190_c0	(1) 5,6-Dihydrothymine[c0] + (1) H2O[c0] <=> (1) 3-Ureidoisobutyrate[c0] + (1) H+[c0]	RXN-11211.c	R_R03055_c	R03055_c
rxn02190_r0	(1) 5,6-Dihydrothymine[r0] + (1) H2O[r0] <=> (1) 3-Ureidoisobutyrate[r0] + (1) H+[r0]	RXN-11211.c	R_R03055_c	R03055_c
rxn02192_c0	(1) H2O[c0] + (1) Leukotriene A4[c0] <=> (1) Leukotriene B4[c0]	LEUKOTRIENE-A4-HYDROLASE-RXN.c	R_R03057_c	R03057_c
rxn02200_c0	(1) 2-Amino-4-hydroxy-6-hydroxymethyl-7,8-dihydropteridine[c0] + (1) 4-Aminobenzoate[c0] <=> (1) Dihydropteroate[c0] + (1) H2O[c0]
rxn02201_c0	(1) 2-Amino-7,8-dihydro-4-hydroxy-6-(diphosphooxymethyl)pteridine[c0] + (1) 4-Aminobenzoate[c0] => (1) Dihydropteroate[c0] + (1) Diphosphate[c0] + (1) H+[c0]	H2PTEROATESYNTH-RXN.c	R_R03066_c|R_R03067_c	R03066_c|R03067_c
rxn02212_c0	(1) 2-Dehydro-3-deoxy-D-arabino-heptonate 7-phosphate[c0] => (1) 3-Dehydroquinate[c0] + (1) Orthophosphate[c0]	3-DEHYDROQUINATE-SYNTHASE-RXN.c	R_R03083_c	R03083_c
rxn02213_c0	(1) 3-Dehydroquinate[c0] => (1) 3-Dehydroshikimate[c0] + (1) H2O[c0]	3-DEHYDROQUINATE-DEHYDRATASE-RXN.c	R_R03084_c	R03084_c
rxn02213_n0	(1) 3-Dehydroquinate[n0] => (1) 3-Dehydroshikimate[n0] + (1) H2O[n0]	3-DEHYDROQUINATE-DEHYDRATASE-RXN.c	R_R03084_c	R03084_c
rxn02219_c0	(1) 3-Indoleacetonitrile[c0] + (2) H2O[c0] => (1) Indole-3-acetate[c0] + (1) NH3[c0]	RXN-1404.c	R_R03093_c	R03093_c
rxn02219_n0	(1) 3-Indoleacetonitrile[n0] + (2) H2O[n0] <=> (1) Indole-3-acetate[n0] + (1) NH3[n0]	RXN-1404.c	R_R03093_c	R03093_c
rxn02220_c0	(1) H+[c0] + (1) Indole-3-acetate[c0] + (1) UDP-glucose[c0] => (1) Indole-3-acetyl-beta-1-D-glucoside[c0] + (1) UDP[c0]	2.4.1.121-RXN.c.araexp.CPD-12575		R03094_c
rxn02222_c0	(1) (Indol-3-yl)acetamide[c0] + (1) H2O[c0] => (1) Indole-3-acetate[c0] + (1) NH3[c0]	RXNN-404.c
rxn02222_n0	(1) (Indol-3-yl)acetamide[n0] + (1) H2O[n0] => (1) Indole-3-acetate[n0] + (1) NH3[n0]	RXNN-404.c
rxn02224_c0	(1) ATP[c0] + (1) L-2-Aminoadipate[c0] <=> (1) Diphosphate[c0] + (1) L-2-Aminoadipate adenylate[c0]
rxn02226_c0	(1) H2O[c0] + (1) L-2-Aminoadipate 6-semialdehyde[c0] + (1) NAD+[c0] <=> (2) H+[c0] + (1) L-2-Aminoadipate[c0] + (1) NADH[c0]	1.2.1.31-RXN.c.araexp.NAD_NADH|ALLYSINE-DEHYDROG-RXN.c
rxn02227_c0	(1) H2O[c0] + (1) L-2-Aminoadipate 6-semialdehyde[c0] + (1) NADP+[c0] <=> (2) H+[c0] + (1) L-2-Aminoadipate[c0] + (1) NADPH[c0]	1.2.1.31-RXN.c.araexp.NADP_NADPH
rxn02228_c0	(1) 3-Mercaptolactate[c0] + (1) NAD+[c0] <=> (1) H+[c0] + (1) Mercaptopyruvate[c0] + (1) NADH[c0]		R_R03104_c	R03104_c
rxn02229_c0	(1) Mercaptopyruvate[c0] + (1) Sulfite[c0] <=> (1) Pyruvate[c0] + (1) Thiosulfate[c0]
rxn02229_m0	(1) Mercaptopyruvate[m0] + (1) Sulfite[m0] <=> (1) Pyruvate[m0] + (1) Thiosulfate[m0]
rxn02229_n0	(1) Mercaptopyruvate[n0] + (1) Sulfite[n0] <=> (1) Pyruvate[n0] + (1) Thiosulfate[n0]
rxn02230_c0	(1) Hydrogen cyanide[c0] + (1) Mercaptopyruvate[c0] <=> (1) H+[c0] + (1) Pyruvate[c0] + (1) Thiocyanate[c0]	MERCAPYSTRANS-RXN.c
rxn02230_n0	(1) Hydrogen cyanide[n0] + (1) Mercaptopyruvate[n0] <=> (1) H+[n0] + (1) Pyruvate[n0] + (1) Thiocyanate[n0]	MERCAPYSTRANS-RXN.c
rxn02238_c0	(1) NADP+[c0] + (1) cis-3,4-Leucopelargonidin[c0] <=> (1) Dihydrokaempferol[c0] + (1) H+[c0] + (1) NADPH[c0]	DIHYDROKAEMPFEROL-4-REDUCTASE-RXN.c	R_R03123_c	R03123_c
rxn02239_c0	(1) Dihydrokaempferol[c0] + (1) H+[c0] + (1) NADPH[c0] + (1) Oxygen[c0] <=> (1) H2O[c0] + (1) NADP+[c0] + (1) Taxifolin[c0]	RXN-525.c	R_R03124_c	R03124_c
rxn02241_c0	(1) 2-Oxoglutarate[c0] + (1) Dihydrokaempferol[c0] + (1) Oxygen[c0] => (1) CO2[c0] + (1) H+[c0] + (1) H2O[c0] + (1) Kaempferol[c0] + (1) Succinate[c0]	RXN1F-93.c	R_R03126_c	R03126_c
rxn02246_c0	(1) O-Acetyl-L-serine[c0] + (1) Thiosulfate[c0] <=> (1) Acetate[c0] + (1) H+[c0] + (1) S-Sulfo-L-cysteine[c0]	SULFOCYS-RXN.c	R_R03132_c	R03132_c
rxn02248_c0	(1) O-Acetyl-L-serine[c0] + (1) Pyrazole[c0] <=> (1) 3-(Pyrazol-1-yl)-L-alanine[c0] + (1) Acetate[c0] + (1) H+[c0]	2.5.1.51-RXN.c
rxn02250_c0	(1) 1,3-Diaminopropane[c0] + (1) H2O[c0] + (1) Oxygen[c0] => (1) 3-Aminopropanal[c0] + (1) Hydrogen peroxide[c0] + (1) NH3[c0]	RXN-6381.c	R_R03139_c	R03139_c
rxn02251_c0	(1) D-Ribulose 1,5-bisphosphate[c0] + (1) Oxygen[c0] => (1) 2-Phosphoglycolate[c0] + (1) 3-Phospho-D-glycerate[c0] + (2) H+[c0]	CBBLSSYN-RXN.c
rxn02251_x0	(1) D-Ribulose 1,5-bisphosphate[x0] + (1) Oxygen[x0] => (1) 2-Phosphoglycolate[x0] + (1) 3-Phospho-D-glycerate[x0] + (2) H+[x0]	CBBLSSYN-RXN.c
rxn02260_c0	(1) 3-Hydroxypropionyl-CoA[c0] + (1) ADP[c0] + (1) Orthophosphate[c0] <=> (1) 3-Hydroxypropanoate[c0] + (1) ATP[c0] + (1) CoA[c0]
rxn02260_x0	(1) 3-Hydroxypropionyl-CoA[x0] + (1) ADP[x0] + (1) Orthophosphate[x0] <=> (1) 3-Hydroxypropanoate[x0] + (1) ATP[x0] + (1) CoA[x0]
rxn02261_c0	(1) 3-Hydroxypropanoate[c0] + (1) CoA[c0] + (1) H+[c0] <= (1) 3-Hydroxypropionyl-CoA[c0] + (1) H2O[c0]
rxn02262_c0	(1) 6-Deoxy-L-galactose[c0] + (1) ATP[c0] <=> (1) ADP[c0] + (1) H+[c0] + (1) L-Fucose 1-phosphate[c0]
rxn02264_c0	(1) Hydroxymethylbilane[c0] <=> (1) H2O[c0] + (1) Uroporphyrinogen III[c0]	UROGENIIISYN-RXN.c	R_R03165_c	R03165_c
rxn02269_c0	(1) (S)-3-Methyl-2-oxopentanoic acid[c0] + (1) CoA[c0] + (1) NAD+[c0] => (1) (S)-2-Methylbutanoyl-CoA[c0] + (1) CO2[c0] + (1) NADH[c0]
rxn02270_c0	(1) 2-Methylbutanoyl-CoA[c0] + (1) FAD[c0] + (1) H+[c0] <=> (1) 2-Methylbut-2-enoyl-CoA[c0] + (1) FADH2[c0]	2-MEBUCOA-FAD-RXN.c	R_R03172_c	R03172_c
rxn02275_c0	(1) 4-Guanidinobutanamide[c0] + (1) H2O[c0] => (1) 4-Guanidinobutanoate[c0] + (1) NH3[c0]	GUANIDINOBUTANAMIDE-NH3-RXN.c
rxn02276_c0	(1) 4-Maleylacetoacetate[c0] <=> (1) 4-Fumarylacetoacetate[c0]	MALEYLACETOACETATE-ISOMERASE-RXN.c
rxn02277_c0	(1) 7,8-Diaminononanoate[c0] + (1) ATP[c0] + (1) CO2[c0] => (1) ADP[c0] + (1) Dethiobiotin[c0] + (3) H+[c0] + (1) Orthophosphate[c0]	DETHIOBIOTIN-SYN-RXN.c	R_R03182_c	R03182_c
rxn02287_c0	(2) S-Adenosyl-L-methionine[c0] + (1) Uroporphyrinogen III[c0] <=> (1) H+[c0] + (1) Precorrin 2[c0] + (2) S-Adenosyl-L-homocysteine[c0]	RXN-13403.c	R_R03194_c	R03194_c
rxn02288_c0	(4) H+[c0] + (1) Uroporphyrinogen III[c0] => (4) CO2[c0] + (1) Coproporphyrinogen III[c0]	UROGENDECARBOX-RXN.c	R_R03197_c	R03197_c
rxn02290_c0	(1) (S)-2,3-Epoxysqualene[c0] => (1) Lanosterol[c0]	LANOSTEROL-SYNTHASE-RXN.c	R_R03199_c	R03199_c
rxn02291_c0	(1) (S)-2,3-Epoxysqualene[c0] <=> (1) Cycloartenol[c0]	CYCLOARTENOL-SYNTHASE-RXN.c	R_R03200_c	R03200_c
rxn02297_c0	(1) 6-Carboxyhexanoyl-CoA[c0] + (1) H+[c0] + (1) L-Alanine[c0] => (1) 8-Amino-7-oxononanoate[c0] + (1) CO2[c0] + (1) CoA[c0]	7KAPSYN-RXN.c	R_R03210_c	R03210_c
rxn02299_c0	(1) H+[c0] + (1) Phenylacetothiohydroximate[c0] + (1) UDP-glucose[c0] => (1) Desulfoglucotropeolin[c0] + (1) UDP[c0]	2.4.1.195-RXN.c.araexp.CPD-12575|RXN-4605.c.araexp.CPD-12575		R03213_c
rxn02300_c0	(1) 3'-Phosphoadenylyl sulfate[c0] + (1) Desulfoglucotropeolin[c0] => (1) Adenosine 3',5'-bisphosphate[c0] + (1) Glucotropaeolin[c0] + (1) H+[c0]	RXN-4606.c
rxn02302_c0	(1) L-Cysteine[c0] + (1) O-Acetyl-L-homoserine[c0] <=> (1) Acetate[c0] + (1) H+[c0] + (1) L-Cystathionine[c0]	RXN-721.c	R_R03217_c	R03217_c
rxn02303_c0	(1) Coproporphyrinogen III[c0] + (2) H+[c0] + (1) Oxygen[c0] => (2) CO2[c0] + (2) H2O[c0] + (1) Protoporphyrinogen IX[c0]	RXN0-1461.c	R_R03220_c	R03220_c
rxn02304_c0	(3) Oxygen[c0] + (1) Protoporphyrinogen IX[c0] <=> (3) Hydrogen peroxide[c0] + (1) Protoporphyrin[c0]	PROTOPORGENOXI-RXN.c
rxn02305_c0	(1) 2-Methyl-4-amino-5-hydroxymethylpyrimidine diphosphate[c0] + (1) 4-Methyl-5-(2-phosphoethyl)-thiazole[c0] => (1) Diphosphate[c0] + (1) Thiamin monophosphate[c0]		R_R03223_c	R03223_c
rxn02305_m0	(1) 2-Methyl-4-amino-5-hydroxymethylpyrimidine diphosphate[m0] + (1) 4-Methyl-5-(2-phosphoethyl)-thiazole[m0] => (1) Diphosphate[m0] + (1) Thiamin monophosphate[m0]		R_R03223_c	R03223_c
rxn02311_c0	(1) Acetyl-CoA[c0] + (1) Deacetylvindoline[c0] => (1) CoA[c0] + (1) Vindoline[c0]	2.3.1.107-RXN.c
rxn02312_c0	(1) 8-Amino-7-oxononanoate[c0] + (1) S-Adenosyl-L-methionine[c0] <=> (1) 7,8-Diaminononanoate[c0] + (1) S-Adenosyl-4-methylthio-2-oxobutanoate[c0]	DAPASYN-RXN.c	R_R03231_c	R03231_c
rxn02314_c0	(1) ATP[c0] + (1) D-Tagatose 6-phosphate[c0] <=> (1) ADP[c0] + (1) D-Tagatose 1,6-bisphosphate[c0] + (1) H+[c0]
rxn02315_c0	(1) CTP[c0] + (1) D-Tagatose 6-phosphate[c0] <=> (1) CDP[c0] + (1) D-Tagatose 1,6-bisphosphate[c0] + (1) H+[c0]
rxn02316_c0	(1) D-Tagatose 6-phosphate[c0] + (1) UTP[c0] => (1) D-Tagatose 1,6-bisphosphate[c0] + (1) H+[c0] + (1) UDP[c0]
rxn02317_c0	(1) D-Tagatose 6-phosphate[c0] + (1) ITP[c0] => (1) D-Tagatose 1,6-bisphosphate[c0] + (1) H+[c0] + (1) IDP[c0]
rxn02320_c0	(1) 2-Oxoglutarate[c0] + (1) L-Histidinol phosphate[c0] <=> (1) 3-(Imidazol-4-yl)-2-oxopropyl phosphate[c0] + (1) L-Glutamate[c0]	HISTAMINOTRANS-RXN.c	R_R03243_c	R03243_c
rxn02322_c0	(1) (R)-5-Phosphomevalonate[c0] + (1) ATP[c0] + (1) H+[c0] <=> (1) (R)-5-Diphosphomevalonate[c0] + (1) ADP[c0]	PHOSPHOMEVALONATE-KINASE-RXN.c	R_R03245_c	R03245_c
rxn02324_c0	(1) Gallate[c0] + (1) H+[c0] => (1) 1,2,3-Trihydroxybenzene[c0] + (1) CO2[c0]
rxn02331_c0	(1) 3-Deoxy-D-manno-octulosonate 8-phosphate[c0] + (1) Orthophosphate[c0] <= (1) D-Arabinose 5-phosphate[c0] + (1) H2O[c0] + (1) Phosphoenolpyruvate[c0]	KDO-8PSYNTH-RXN.c	R_R03254_c	R03254_c
rxn02337_c0	(1) 2-trans,6-trans-Farnesol[c0] + (1) NADP+[c0] <=> (1) 2-trans,6-trans-Farnesal[c0] + (1) H+[c0] + (1) NADPH[c0]	FARNESOL-DEHYDROGENASE-RXN.c
rxn02341_c0	(1) (R)-4'-Phosphopantothenoyl-L-cysteine[c0] + (1) H+[c0] => (1) CO2[c0] + (1) Pantetheine 4'-phosphate[c0]	P-PANTOCYSDECARB-RXN.c	R_R03269_c	R03269_c
rxn02342_c0	(1) 2-(alpha-Hydroxyethyl)thiamine diphosphate[c0] + (1) Enzyme N6-(lipoyl)lysine[c0] <=> (1) Thiamin diphosphate[c0] + (1) [Dihydrolipoyllysine-residue acetyltransferase] S-acetyldihydrolipoyllysine[c0]
rxn02342_d0	(1) 2-(alpha-Hydroxyethyl)thiamine diphosphate[d0] + (1) Enzyme N6-(lipoyl)lysine[d0] <=> (1) Thiamin diphosphate[d0] + (1) [Dihydrolipoyllysine-residue acetyltransferase] S-acetyldihydrolipoyllysine[d0]
rxn02342_m0	(1) 2-(alpha-Hydroxyethyl)thiamine diphosphate[m0] + (1) Enzyme N6-(lipoyl)lysine[m0] <=> (1) Thiamin diphosphate[m0] + (1) [Dihydrolipoyllysine-residue acetyltransferase] S-acetyldihydrolipoyllysine[m0]
rxn02350_c0	(1) 4-Trimethylammoniobutanal[c0] + (1) H2O[c0] + (1) NAD+[c0] <=> (1) 4-Trimethylammoniobutanoate[c0] + (2) H+[c0] + (1) NADH[c0]		R_R03283_c	R03283_c
rxn02350_d0	(1) 4-Trimethylammoniobutanal[d0] + (1) H2O[d0] + (1) NAD+[d0] <=> (1) 4-Trimethylammoniobutanoate[d0] + (2) H+[d0] + (1) NADH[d0]		R_R03283_c	R03283_c
rxn02350_m0	(1) 4-Trimethylammoniobutanal[m0] + (1) H2O[m0] + (1) NAD+[m0] <=> (1) 4-Trimethylammoniobutanoate[m0] + (2) H+[m0] + (1) NADH[m0]		R_R03283_c	R03283_c
rxn02354_c0	(1) 3'-Phosphoadenylyl sulfate[c0] + (1) Quercetin 3,3'-bissulfate[c0] <=> (1) Adenosine 3',5'-bisphosphate[c0] + (1) Quercetin 3,3',7-trissulfate[c0]	2.8.2.28-RXN.c
rxn02356_c0	(1) Hydroxyproline[c0] + (1) NAD+[c0] <=> (2) H+[c0] + (1) L-1-Pyrroline-3-hydroxy-5-carboxylate[c0] + (1) NADH[c0]		R_R03291_c	R03291_c
rxn02356_d0	(1) Hydroxyproline[d0] + (1) NAD+[d0] => (2) H+[d0] + (1) L-1-Pyrroline-3-hydroxy-5-carboxylate[d0] + (1) NADH[d0]		R_R03291_c	R03291_c
rxn02358_c0	(1) Hydroxyproline[c0] + (1) NADP+[c0] => (2) H+[c0] + (1) L-1-Pyrroline-3-hydroxy-5-carboxylate[c0] + (1) NADPH[c0]			R03293_c
rxn02358_d0	(1) Hydroxyproline[d0] + (1) NADP+[d0] <=> (2) H+[d0] + (1) L-1-Pyrroline-3-hydroxy-5-carboxylate[d0] + (1) NADPH[d0]			R03293_c
rxn02364_c0	(1) 3,4-Dihydroxyphenylacetaldehyde[c0] + (1) H2O[c0] + (1) NAD+[c0] <=> (1) 3,4-Dihydroxyphenylacetate[c0] + (2) H+[c0] + (1) NADH[c0]	RXN6666-5.c
rxn02364_d0	(1) 3,4-Dihydroxyphenylacetaldehyde[d0] + (1) H2O[d0] + (1) NAD+[d0] <=> (1) 3,4-Dihydroxyphenylacetate[d0] + (2) H+[d0] + (1) NADH[d0]	RXN6666-5.c
rxn02371_c0	(1) H+[c0] + (1) Lathosterol[c0] + (1) NADH[c0] + (1) Oxygen[c0] => (1) 7-Dehydrocholesterol[c0] + (2) H2O[c0] + (1) NAD+[c0]	1.14.21.6-RXN.c.araexp.NAD_NADH		R03310_c
rxn02373_c0	(1) L-Glutamate 5-semialdehyde[c0] + (1) NADP+[c0] + (1) Orthophosphate[c0] <=> (1) H+[c0] + (1) L-Glutamyl 5-phosphate[c0] + (1) NADPH[c0]	GLUTSEMIALDEHYDROG-RXN.c	R_R03313_c	R03313_c
rxn02374_c0	(1) L-Glutamate 5-semialdehyde[c0] => (1) (S)-1-Pyrroline-5-carboxylate[c0] + (1) H+[c0] + (1) H2O[c0]	SPONTPRO-RXN.c
rxn02375_c0	(1) ATP[c0] + (1) Pseudouridine[c0] => (1) ADP[c0] + (1) H+[c0] + (1) Pseudouridine 5'-phosphate[c0]	PSEUDOURIDINE-KINASE-RXN.c
rxn02376_c0	(1) 3-Carboxy-1-hydroxypropyl-ThPP[c0] + (1) Enzyme N6-(lipoyl)lysine[c0] + (1) H+[c0] <=> (1) Thiamin diphosphate[c0] + (1) [Dihydrolipoyllysine-residue succinyltransferase] S-succinyldihydrolipoyllysine[c0]
rxn02380_c0	(1) beta-D-Glucose 6-phosphate[c0] <=> (1) beta-D-Fructose 6-phosphate[c0]	PGLUCISOM-RXN.c	R_R03321_c	R03321_c
rxn02392_c0	(1) 3-(4-Hydroxyphenyl)lactate[c0] + (1) NAD+[c0] <=> (1) 3-(4-Hydroxyphenyl)pyruvate[c0] + (1) H+[c0] + (1) NADH[c0]	HYDROXYPHENYLPYRUVATE-REDUCTASE-RXN.c
rxn02393_c0	(1) (R)-3-(4-Hydroxyphenyl)lactate[c0] + (1) NAD+[c0] <=> (1) 3-(4-Hydroxyphenyl)pyruvate[c0] + (1) H+[c0] + (1) NADH[c0]	1.1.1.222-RXN.c.araexp.NAD_NADH
rxn02395_c0	(1) (R)-3-(4-Hydroxyphenyl)lactate[c0] + (1) NADP+[c0] <=> (1) 3-(4-Hydroxyphenyl)pyruvate[c0] + (1) H+[c0] + (1) NADPH[c0]	1.1.1.222-RXN.c.araexp.NADP_NADPH
rxn02396_c0	(1) 3-(4-Hydroxyphenyl)pyruvate[c0] + (1) H+[c0] <=> (1) 4-Hydroxyphenylacetaldehyde[c0] + (1) CO2[c0]	4.1.1.80-RXN.c	R_R03341_c	R03341_c
rxn02398_c0	(1) H+[c0] + (1) N,N-Dimethylaniline[c0] + (1) NADPH[c0] + (1) Oxygen[c0] <=> (1) H2O[c0] + (1) N,N-Dimethylaniline N-oxide[c0] + (1) NADP+[c0]	1.14.13.8-RXN.c
rxn02400_c0	(1) H2O[c0] + (1) Nicotinate D-ribonucleotide[c0] <=> (1) Nicotinate D-ribonucleoside[c0] + (1) Orthophosphate[c0]		R_R03346_c	R03346_c
rxn02401_c0	(1) ADP[c0] + (1) H+[c0] + (1) Nicotinate D-ribonucleotide[c0] <= (1) ATP[c0] + (1) Nicotinate D-ribonucleoside[c0]	RXN-8443.c	R_R03347_c	R03347_c
rxn02401_d0	(1) ADP[d0] + (1) H+[d0] + (1) Nicotinate D-ribonucleotide[d0] <= (1) ATP[d0] + (1) Nicotinate D-ribonucleoside[d0]	RXN-8443.c	R_R03347_c	R03347_c
rxn02401_n0	(1) ADP[n0] + (1) H+[n0] + (1) Nicotinate D-ribonucleotide[n0] <= (1) ATP[n0] + (1) Nicotinate D-ribonucleoside[n0]	RXN-8443.c	R_R03347_c	R03347_c
rxn02401_w0	(1) ADP[w0] + (1) H+[w0] + (1) Nicotinate D-ribonucleotide[w0] <= (1) ATP[w0] + (1) Nicotinate D-ribonucleoside[w0]	RXN-8443.c	R_R03347_c	R03347_c
rxn02401_x0	(1) ADP[x0] + (1) H+[x0] + (1) Nicotinate D-ribonucleotide[x0] <= (1) ATP[x0] + (1) Nicotinate D-ribonucleoside[x0]	RXN-8443.c	R_R03347_c	R03347_c
rxn02402_c0	(1) CO2[c0] + (1) Diphosphate[c0] + (1) Nicotinate D-ribonucleotide[c0] <=> (1) 5-Phospho-alpha-D-ribose 1-diphosphate[c0] + (1) H+[c0] + (1) Quinolinate[c0]	QUINOPRIBOTRANS-RXN.c	R_R03348_c	R03348_c
rxn02404_c0	(1) 3-Deoxy-D-manno-octulosonate 8-phosphate[c0] + (1) H2O[c0] <=> (1) 3-Deoxy-D-manno-octulosonate[c0] + (1) Orthophosphate[c0]	KDO-8PPHOSPHAT-RXN.c	R_R03350_c	R03350_c
rxn02405_c0	(1) 3-Deoxy-D-manno-octulosonate[c0] + (1) CTP[c0] => (1) CMP-3-deoxy-D-manno-octulosonate[c0] + (1) Diphosphate[c0] + (1) H+[c0]	CPM-KDOSYNTH-RXN.c	R_R03351_c	R03351_c
rxn02405_m0	(1) 3-Deoxy-D-manno-octulosonate[m0] + (1) CTP[m0] => (1) CMP-3-deoxy-D-manno-octulosonate[m0] + (1) Diphosphate[m0] + (1) H+[m0]	CPM-KDOSYNTH-RXN.c	R_R03351_c	R03351_c
rxn02407_c0	(1) Lathosterol[c0] <= (1) 5alpha-Cholest-8-en-3beta-ol[c0]	RXN66-25.c		R03353_c
rxn02409_c0	(1) H2O[c0] + (1) beta-D-Galactosyl-1,4-beta-D-glucosylceramide[c0] => (1) Glucosylceramide[c0] + (1) beta-D-Galactose[c0]		R_R03355_c	R03355_c
rxn02410_c0	(1) 1-Palmitoylglycerol 3-phosphate[c0] + (1) NADP+[c0] <=> (1) H+[c0] + (1) NADPH[c0] + (1) Palmitoylglycerone phosphate[c0]	ACYLGLYCERONE-PHOSPHATE-REDUCTASE-RXN.c
rxn02414_c0	(1) Caffeate[c0] + (1) S-Adenosyl-L-methionine[c0] <=> (1) Ferulate[c0] + (1) H+[c0] + (1) S-Adenosyl-L-homocysteine[c0]	CAFFEATE-O-METHYLTRANSFERASE-RXN.c|RXN-1104.c	R_R03366_c	R03366_c
rxn02414_n0	(1) Caffeate[n0] + (1) S-Adenosyl-L-methionine[n0] <=> (1) Ferulate[n0] + (1) H+[n0] + (1) S-Adenosyl-L-homocysteine[n0]	CAFFEATE-O-METHYLTRANSFERASE-RXN.c|RXN-1104.c	R_R03366_c	R03366_c
rxn02417_c0	(1) H2O[c0] + (1) Phytic acid[c0] <=> (1) D-myo-Inositol 1,2,4,5,6-pentakisphosphate[c0] + (1) Orthophosphate[c0]	RXN-10943.c|RXN-7920.c.araexp.CPD-534
rxn02418_c0	(1) H2O[c0] + (1) Phytic acid[c0] <=> (1) Inositol 1,2,3,5,6-pentakisphosphate[c0] + (1) Orthophosphate[c0]	6-PHYT-RXN.c|RXN-10940.c|RXN-7920.c.araexp.MI-PENTAKISPHOSPHATE
rxn02421_c0	(1) CTP[c0] + (1) N-Methylethanolamine phosphate[c0] <=> (1) CDP-N-methylethanolamine[c0] + (1) Diphosphate[c0]	2.7.7.57-RXN.c
rxn02424_c0	(1) (S)-Methylmalonate semialdehyde[c0] + (1) CoA[c0] + (1) NAD+[c0] <=> (1) (R)-Methylmalonyl-CoA[c0] + (1) H+[c0] + (1) NADH[c0]
rxn02424_m0	(1) (S)-Methylmalonate semialdehyde[m0] + (1) CoA[m0] + (1) NAD+[m0] <=> (1) (R)-Methylmalonyl-CoA[m0] + (1) H+[m0] + (1) NADH[m0]
rxn02425_c0	(1) (R)-Methylmalonyl-CoA[c0] + (1) H2O[c0] => (1) CoA[c0] + (1) H+[c0] + (1) Methylmalonate[c0]
rxn02434_c0	(1) 1D-myo-Inositol 1,4-bisphosphate[c0] + (1) H2O[c0] <=> (1) Orthophosphate[c0] + (1) myo-Inositol 4-phosphate[c0]	3.1.3.57-RXN.c	R_R03393_c	R03393_c
rxn02434_m0	(1) 1D-myo-Inositol 1,4-bisphosphate[m0] + (1) H2O[m0] <=> (1) Orthophosphate[m0] + (1) myo-Inositol 4-phosphate[m0]	3.1.3.57-RXN.c	R_R03393_c	R03393_c
rxn02435_c0	(1) D-myo-Inositol 1,4,5-trisphosphate[c0] + (1) H2O[c0] <=> (1) 1D-myo-Inositol 1,4-bisphosphate[c0] + (1) Orthophosphate[c0]	3.1.3.56-RXN.c
rxn02441_c0	(1) 8-[(1R,2R)-3-Oxo-2-{(Z)-pent-2-enyl}cyclopentyl]octanoate[c0] + (1) NADP+[c0] <=> (1) 12-OPDA[c0] + (1) H+[c0] + (1) NADPH[c0]	12-OXOPHYTODIENOATE-REDUCTASE-RXN.c
rxn02441_x0	(1) 8-[(1R,2R)-3-Oxo-2-{(Z)-pent-2-enyl}cyclopentyl]octanoate[x0] + (1) NADP+[x0] <=> (1) 12-OPDA[x0] + (1) H+[x0] + (1) NADPH[x0]	12-OXOPHYTODIENOATE-REDUCTASE-RXN.c
rxn02442_c0	(1) (9Z,15Z)-(13S)-12,13-Epoxyoctadeca-9,11,15-trienoic acid[c0] => (1) 12-OPDA[c0]	ALLENE-OXIDE-CYCLASE-RXN.c
rxn02450_c0	(1) 2-Acyl-sn-glycero-3-phosphoethanolamine[c0] + (1) H2O[c0] <=> (1) Fatty acid[c0] + (1) sn-glycero-3-Phosphoethanolamine[c0]
rxn02451_c0	(1) Raffinose[c0] + (1) alpha-D-Galactosyl-(1->3)-1D-myo-inositol[c0] <=> (1) Stachyose[c0] + (1) myo-Inositol[c0]	2.4.1.67-RXN.c	R_R03418_c	R03418_c|R06042_c
rxn02452_c0	(1) H2O[c0] + (1) N4-(Acetyl-beta-D-glucosaminyl)asparagine[c0] <=> (1) H+[c0] + (1) L-Aspartate[c0] + (1) N-Acetyl-beta-D-glucosaminylamine[c0]	3.5.1.26-RXN.c
rxn02455_c0	(1) 1D-myo-Inositol 1,3,4-trisphosphate[c0] + (1) H2O[c0] <=> (1) D-myo-Inositol 3,4-bisphosphate[c0] + (1) Orthophosphate[c0]	RXN-10939.c	R_R03427_c	R03427_c
rxn02455_m0	(1) 1D-myo-Inositol 1,3,4-trisphosphate[m0] + (1) H2O[m0] <=> (1) D-myo-Inositol 3,4-bisphosphate[m0] + (1) Orthophosphate[m0]	RXN-10939.c	R_R03427_c	R03427_c
rxn02456_c0	(1) 1D-myo-Inositol 1,3,4-trisphosphate[c0] + (1) ATP[c0] => (1) 1D-myo-Inositol 1,3,4,5-tetrakisphosphate[c0] + (1) ADP[c0] + (1) H+[c0]	2.7.1.139-RXN.c
rxn02456_n0	(1) 1D-myo-Inositol 1,3,4-trisphosphate[n0] + (1) ATP[n0] => (1) 1D-myo-Inositol 1,3,4,5-tetrakisphosphate[n0] + (1) ADP[n0] + (1) H+[n0]	2.7.1.139-RXN.c
rxn02457_c0	(1) 1D-myo-Inositol 1,3,4-trisphosphate[c0] + (1) ATP[c0] => (1) 1D-myo-Inositol 1,3,4,6-tetrakisphosphate[c0] + (1) ADP[c0] + (1) H+[c0]	2.7.1.133-RXN.c
rxn02457_n0	(1) 1D-myo-Inositol 1,3,4-trisphosphate[n0] + (1) ATP[n0] => (1) 1D-myo-Inositol 1,3,4,6-tetrakisphosphate[n0] + (1) ADP[n0] + (1) H+[n0]	2.7.1.133-RXN.c
rxn02458_c0	(1) 1D-myo-Inositol 1,3,4,5-tetrakisphosphate[c0] + (1) H2O[c0] <=> (1) 1D-myo-Inositol 1,3,4-trisphosphate[c0] + (1) Orthophosphate[c0]	RXN-8730.c
rxn02460_c0	(1) ATP[c0] + (1) D-myo-Inositol 1,4,5-trisphosphate[c0] => (1) 1D-myo-Inositol 1,3,4,5-tetrakisphosphate[c0] + (1) ADP[c0] + (1) H+[c0]	2.7.1.127-RXN.c
rxn02461_c0	(1) 1D-myo-Inositol 1,3,4,5-tetrakisphosphate[c0] + (1) H2O[c0] <=> (1) D-myo-Inositol 1,4,5-trisphosphate[c0] + (1) Orthophosphate[c0]	3.1.3.62-RXN.c
rxn02462_c0	(1) 1-Organyl-2-lyso-sn-glycero-3-phosphocholine[c0] + (1) Acetyl-CoA[c0] => (1) 2-Acetyl-1-alkyl-sn-glycero-3-phosphocholine[c0] + (1) CoA[c0]
rxn02465_c0	(1) N-Acetyl-L-glutamate 5-semialdehyde[c0] + (1) NADP+[c0] + (1) Orthophosphate[c0] <=> (1) H+[c0] + (1) N-Acetyl-L-glutamate 5-phosphate[c0] + (1) NADPH[c0]	N-ACETYLGLUTPREDUCT-RXN.c	R_R03443_c	R03443_c
rxn02467_c0	(1) 4-(2-Aminophenyl)-2,4-dioxobutanoate[c0] => (1) 4-Hydroxy-2-quinolinecarboxylic acid[c0] + (1) H2O[c0]	RXN-10720.c
rxn02470_c0	(1) 3,9-Dihydroxypterocarpan[c0] + (1) H+[c0] + (1) NADPH[c0] + (1) Oxygen[c0] => (1) 3,6,9-Trihydroxypterocarpan[c0] + (1) H2O[c0] + (1) NADP+[c0]	RXN-4505.c
rxn02472_c0	(1) 3,7-Di-O-methylquercetin[c0] + (1) S-Adenosyl-L-methionine[c0] <=> (1) 3,7,4'-Tri-O-methylquercetin[c0] + (1) H+[c0] + (1) S-Adenosyl-L-homocysteine[c0]	2.1.1.83-RXN.c
rxn02473_c0	(1) D-erythro-1-(Imidazol-4-yl)glycerol 3-phosphate[c0] => (1) 3-(Imidazol-4-yl)-2-oxopropyl phosphate[c0] + (1) H2O[c0]	IMIDPHOSDEHYD-RXN.c	R_R03457_c	R03457_c
rxn02474_c0	(1) 5-Amino-6-(5'-phospho-D-ribitylamino)uracil[c0] + (1) NADP+[c0] <=> (1) 5-Amino-6-(5'-phosphoribosylamino)uracil[c0] + (1) H+[c0] + (1) NADPH[c0]	RIBOFLAVINSYNREDUC-RXN.c	R_R03458_c	R03458_c
rxn02475_c0	(1) 2,5-Diamino-6-(5-phospho-D-ribosylamino)pyrimidin-4(3H)-one[c0] + (1) H+[c0] + (1) H2O[c0] => (1) 5-Amino-6-(5'-phosphoribosylamino)uracil[c0] + (1) NH3[c0]	RIBOFLAVINSYNDEAM-RXN.c	R_R03459_c	R03459_c
rxn02476_c0	(1) Phosphoenolpyruvate[c0] + (1) Shikimate 3-phosphate[c0] <=> (1) 5-O-(1-Carboxyvinyl)-3-phosphoshikimate[c0] + (1) Orthophosphate[c0]	2.5.1.19-RXN.c	R_R03460_c	R03460_c
rxn02484_c0	(1) 4-Amino-5-hydroxymethyl-2-methylpyrimidine[c0] + (1) ATP[c0] => (1) 4-Amino-2-methyl-5-phosphomethylpyrimidine[c0] + (1) ADP[c0] + (1) H+[c0]
rxn02484_m0	(1) 4-Amino-5-hydroxymethyl-2-methylpyrimidine[m0] + (1) ATP[m0] => (1) 4-Amino-2-methyl-5-phosphomethylpyrimidine[m0] + (1) ADP[m0] + (1) H+[m0]
rxn02489_c0	(1) 1D-myo-Inositol 1,3,4,6-tetrakisphosphate[c0] + (1) ATP[c0] => (1) 1D-myo-Inositol 1,3,4,5,6-pentakisphosphate[c0] + (1) ADP[c0] + (1) H+[c0]	2.7.1.140-RXN.c
rxn02490_c0	(1) 1D-myo-Inositol 3,4,5,6-tetrakisphosphate[c0] + (1) ATP[c0] => (1) 1D-myo-Inositol 1,3,4,5,6-pentakisphosphate[c0] + (1) ADP[c0] + (1) H+[c0]	2.7.1.134-RXN.c
rxn02490_n0	(1) 1D-myo-Inositol 3,4,5,6-tetrakisphosphate[n0] + (1) ATP[n0] => (1) 1D-myo-Inositol 1,3,4,5,6-pentakisphosphate[n0] + (1) ADP[n0] + (1) H+[n0]	2.7.1.134-RXN.c
rxn02503_c0	(1) 2-Amino-4-hydroxy-6-hydroxymethyl-7,8-dihydropteridine[c0] + (1) ATP[c0] => (1) 2-Amino-7,8-dihydro-4-hydroxy-6-(diphosphooxymethyl)pteridine[c0] + (1) AMP[c0] + (1) H+[c0]	H2PTERIDINEPYROPHOSPHOKIN-RXN.c	R_R03503_c	R03503_c
rxn02504_c0	(1) 2-Amino-4-hydroxy-6-(D-erythro-1,2,3-trihydroxypropyl)-7,8-dihydropteridine[c0] <=> (1) 2-Amino-4-hydroxy-6-hydroxymethyl-7,8-dihydropteridine[c0] + (1) Glycolaldehyde[c0]	H2NEOPTERINALDOL-RXN.c	R_R03504_c	R03504_c
rxn02507_c0	(1) 1-(2-Carboxyphenylamino)-1-deoxy-D-ribulose 5-phosphate[c0] + (1) H+[c0] <=> (1) CO2[c0] + (1) H2O[c0] + (1) Indoleglycerol phosphate[c0]	IGPSYN-RXN.c	R_R03508_c	R03508_c
rxn02508_c0	(1) N-(5-Phospho-D-ribosyl)anthranilate[c0] <=> (1) 1-(2-Carboxyphenylamino)-1-deoxy-D-ribulose 5-phosphate[c0]		R_R03509_c	R03509_c
rxn02516_c0	(1) Hydrogen cyanide[c0] + (1) L-Cysteine[c0] <=> (1) 3-Cyano-L-alanine[c0] + (1) H+[c0] + (1) Hydrogen sulfide[c0]	L-3-CYANOALANINE-SYNTHASE-RXN.c		R03524_c
rxn02517_c0	(1) ATP[c0] + (1) dIDP[c0] <=> (1) ADP[c0] + (1) dITP[c0]		R_R03530_c	R03530_c
rxn02517_d0	(1) ATP[d0] + (1) dIDP[d0] <=> (1) ADP[d0] + (1) dITP[d0]		R_R03530_c	R03530_c
rxn02517_m0	(1) ATP[m0] + (1) dIDP[m0] <=> (1) ADP[m0] + (1) dITP[m0]		R_R03530_c	R03530_c
rxn02517_n0	(1) ATP[n0] + (1) dIDP[n0] <=> (1) ADP[n0] + (1) dITP[n0]		R_R03530_c	R03530_c
rxn02517_x0	(1) ATP[x0] + (1) dIDP[x0] <=> (1) ADP[x0] + (1) dITP[x0]		R_R03530_c	R03530_c
rxn02518_c0	(1) H2O[c0] + (1) dITP[c0] => (1) 2'-Deoxyinosine 5'-phosphate[c0] + (1) Diphosphate[c0] + (2) H+[c0]		R_R03531_c	R03531_c
rxn02529_c0	(1) Cyanate[c0] + (1) H+[c0] + (1) HCO3-[c0] => (1) CO2[c0] + (1) Carbamate[c0]	R524-RXN.c	R_R03546_c	R03546_c
rxn02536_c0	(1) H+[c0] + (1) Loganin[c0] + (1) NADPH[c0] + (1) Oxygen[c0] => (2) H2O[c0] + (1) NADP+[c0] + (1) Secologanin[c0]	1.3.3.9-RXN.c
rxn02549_c0	(1) Allyl alcohol[c0] + (1) NADP+[c0] <=> (1) Acrolein[c0] + (1) H+[c0] + (1) NADPH[c0]
rxn02551_c0	(1) Apigenin[c0] + (1) H+[c0] + (1) UDP-glucose[c0] <=> (1) Apigenin 7-O-beta-D-glucoside[c0] + (1) UDP[c0]	RXN-5021.c.araexp.CPD-12575
rxn02554_c0	(1) Ferulate[c0] + (1) H+[c0] + (1) NADPH[c0] + (1) Oxygen[c0] <=> (1) 5-Hydroxyferulic acid methyl ester[c0] + (1) H2O[c0] + (1) NADP+[c0]	RXN-1121.c	R_R07440_c	R07440_c
rxn02554_d0	(1) Ferulate[d0] + (1) H+[d0] + (1) NADPH[d0] + (1) Oxygen[d0] => (1) 5-Hydroxyferulic acid methyl ester[d0] + (1) H2O[d0] + (1) NADP+[d0]	RXN-1121.c	R_R07440_c	R07440_c
rxn02557_c0	(1) Geraniol[c0] + (1) NADP+[c0] <=> (1) Geranial[c0] + (1) H+[c0] + (1) NADPH[c0]	GERANIOL-DEHYDROGENASE-RXN.c
rxn02562_c0	(1) H+[c0] + (1) Luteolin[c0] + (1) UDP-glucose[c0] <=> (1) Luteolin 7-O-beta-D-glucoside[c0] + (1) UDP[c0]	FLAVONE-7-O-BETA-GLUCOSYLTRANSFERASE-RXN.c.araexp.CPD-12575
rxn02563_c0	(1) H+[c0] + (1) Luteolin[c0] + (1) UDP-glucuronate[c0] <=> (1) Luteolin 7-O-glucuronide[c0] + (1) UDP[c0]	LUTEOLIN-7-O-GLUCORONOSYLTRANSFERASE-RXN.c
rxn02564_c0	(1) 2-Oxoglutarate[c0] + (1) Eriodictyol[c0] + (1) Oxygen[c0] <=> (1) CO2[c0] + (1) H+[c0] + (1) H2O[c0] + (1) Luteolin[c0] + (1) Succinate[c0]	RXN-7687.c
rxn02565_c0	(1) Morphine[c0] + (1) NAD+[c0] => (1) H+[c0] + (1) Morphinone[c0] + (1) NADH[c0]
rxn02571_c0	(1) Hydrogen selenide[c0] + (1) O-Acetyl-L-serine[c0] <=> (1) Acetate[c0] + (1) H+[c0] + (1) L-Selenocysteine[c0]			R03601_c
rxn02571_d0	(1) Hydrogen selenide[d0] + (1) O-Acetyl-L-serine[d0] <=> (1) Acetate[d0] + (1) H+[d0] + (1) L-Selenocysteine[d0]			R03601_c
rxn02571_m0	(1) Hydrogen selenide[m0] + (1) O-Acetyl-L-serine[m0] <=> (1) Acetate[m0] + (1) H+[m0] + (1) L-Selenocysteine[m0]			R03601_c
rxn02575_c0	(1) Sinapyl alcohol[c0] + (1) UDP-glucose[c0] <=> (1) Syringin[c0] + (1) UDP[c0]	RXN-90.c.araexp.CPD-12575		R03605_c
rxn02590_c0	(1) Linoleate[c0] + (1) Oxygen[c0] => (1) (9Z,11E)-(13S)-13-Hydroperoxyoctadeca-9,11-dienoic acid[c0]
rxn02597_c0	(1) H2O[c0] + (1) Stachyose[c0] => (1) D-Fructose[c0] + (1) D-Gal alpha 1->6D-Gal alpha 1->6D-Glucose[c0]		R_R03635_c	R03635_c
rxn02597_w0	(1) H2O[w0] + (1) Stachyose[w0] => (1) D-Fructose[w0] + (1) D-Gal alpha 1->6D-Gal alpha 1->6D-Glucose[w0]		R_R03635_c	R03635_c
rxn02598_c0	(1) Leucocyanidin[c0] + (1) NADP+[c0] <=> (1) H+[c0] + (1) NADPH[c0] + (1) Taxifolin[c0]	RXN-600.c	R_R03636_c	R03636_c
rxn02601_c0	(1) H+[c0] + (1) NADPH[c0] + (1) Oxygen[c0] + (1) Taxifolin[c0] <=> (1) Dihydromyricetin[c0] + (1) H2O[c0] + (1) NADP+[c0]	RXN-13718.c
rxn02602_c0	(1) 2-Oxoglutarate[c0] + (1) Eriodictyol[c0] + (1) Oxygen[c0] <=> (1) CO2[c0] + (1) Succinate[c0] + (1) Taxifolin[c0]	RXN-7775.c	R_R03640_c	R03640_c
rxn02611_c0	(1) H+[c0] + (1) L-Dopachrome[c0] => (1) 5,6-Dihydroxyindole[c0] + (1) CO2[c0]		R_R03674_c	R03674_c
rxn02618_c0	(1) H+[c0] + (1) Lanosterol[c0] + (1) NADPH[c0] => (1) 24,25-Dihydrolanosterol[c0] + (1) NADP+[c0]			R03689_c
rxn02618_r0	(1) H+[r0] + (1) Lanosterol[r0] + (1) NADPH[r0] => (1) 24,25-Dihydrolanosterol[r0] + (1) NADP+[r0]			R03689_c
rxn02618_w0	(1) H+[w0] + (1) Lanosterol[w0] + (1) NADPH[w0] => (1) 24,25-Dihydrolanosterol[w0] + (1) NADP+[w0]			R03689_c
rxn02621_c0	(1) Dihydrocoumarin[c0] + (1) H2O[c0] => (1) 3-(2-Hydroxyphenyl)propanoate[c0] + (1) H+[c0]
rxn02627_c0	(1) 2-Oxoglutarate[c0] + (1) Oripavine[c0] + (1) Oxygen[c0] <=> (1) CO2[c0] + (1) Formaldehyde[c0] + (1) Morphinone[c0] + (1) Succinate[c0]	RXN-8151.c
rxn02629_c0	(1) S-Adenosyl-L-methionine[c0] + (1) Thiopurine[c0] <= (1) 6-Methylmercaptopurine[c0] + (1) H+[c0] + (1) S-Adenosyl-L-homocysteine[c0]
rxn02634_c0	(1) UDP-glucose[c0] + (1) trans-2-Hydroxycinnamate[c0] <=> (1) UDP[c0] + (1) trans-beta-D-Glucosyl-2-hydroxycinnamate[c0]	2.4.1.114-RXN.c.araexp.CPD-12575
rxn02644_c0	(1) Desmosterol[c0] + (2) S-Adenosyl-L-methionine[c0] => (2) H+[c0] + (2) S-Adenosyl-L-homocysteine[c0] + (1) Stigmasterol[c0]
rxn02647_c0	(1) H+[c0] + (2) NADPH[c0] + (1) Octadecanal[c0] + (1) Oxygen[c0] => (1) Formate[c0] + (1) H2O[c0] + (1) Heptadecane[c0] + (2) NADP+[c0]	OCTADECANAL-DECARBONYLASE-RXN.c
rxn02655_c0	(1) 3-alpha(S)-Strictosidine[c0] + (1) H2O[c0] => (1) Secologanin[c0] + (1) Tryptamine[c0]	STRICTOSIDINE-SYNTHASE-RXN.c	R_R03738_c	R03738_c
rxn02666_c0	(1) Aminoacetone[c0] + (1) CO2[c0] <= (1) H+[c0] + (1) L-2-Amino-3-oxobutanoic acid[c0]
rxn02677_c0	(1) Cycloeucalenol[c0] <=> (1) Obtusifoliol[c0]	CYCLOEUCALENOL-CYCLOISOMERASE-RXN.c		R03775_c
rxn02678_c0	(1) NADP+[c0] + (1) Octanoyl-CoA[c0] <= (1) H+[c0] + (1) NADPH[c0] + (1) trans-Oct-2-enoyl-CoA[c0]	TRANSENOYLCOARED-RXN.c.araexp.CPD-196_CPD0-2108
rxn02679_c0	(1) FAD[c0] + (1) H+[c0] + (1) Octanoyl-CoA[c0] <=> (1) FADH2[c0] + (1) trans-Oct-2-enoyl-CoA[c0]
rxn02680_c0	(1) Acetyl-CoA[c0] + (1) Octanoyl-CoA[c0] <=> (1) 3-Oxodecanoyl-CoA[c0] + (1) CoA[c0]	RXN-13617.c
rxn02697_c0	(1) 2-Oxoglutarate[c0] + (1) Gibberellin A44 diacid[c0] + (1) Oxygen[c0] => (1) CO2[c0] + (1) Gibberellin A19[c0] + (1) H2O[c0] + (1) Succinate[c0]	RXN1F-168.c	R_R03806_c	R03806_c
rxn02699_c0	(1) 2-Oxoglutarate[c0] + (1) Gibberellin A20[c0] + (1) Oxygen[c0] => (1) CO2[c0] + (1) Gibberellin A29[c0] + (1) Succinate[c0]	RXN-113.c	R_R03809_c	R03809_c
rxn02702_c0	(1) 2-Oxoglutarate[c0] + (1) L-Hyoscyamine[c0] + (1) Oxygen[c0] => (1) (6S)-Hydroxyhyoscyamine[c0] + (1) CO2[c0] + (1) Succinate[c0]	HYOSCYAMINE-6-DIOXYGENASE-RXN.c
rxn02709_c0	(1) (2S)-Flavan-4-ol[c0] + (1) NADP+[c0] <=> (1) (2S)-Flavanone[c0] + (1) H+[c0] + (1) NADPH[c0]	FLAVANONE-4-REDUCTASE-RXN.c		R03827_c
rxn02710_c0	(1) (S)-Reticuline[c0] + (1) Oxygen[c0] => (1) (S)-Scoulerine[c0] + (1) H+[c0] + (1) Hydrogen peroxide[c0]	RETICULINE-OXIDASE-RXN.c
rxn02711_c0	(1) 3'-Hydroxy-N-methyl-(S)-coclaurine[c0] + (1) S-Adenosyl-L-methionine[c0] <=> (1) (S)-Reticuline[c0] + (1) H+[c0] + (1) S-Adenosyl-L-homocysteine[c0]	2.1.1.116-RXN.c
rxn02713_c0	(1) (S)-Scoulerine[c0] + (1) S-Adenosyl-L-methionine[c0] <=> (1) H+[c0] + (1) Isocorypalmine[c0] + (1) S-Adenosyl-L-homocysteine[c0]	2.1.1.117-RXN.c
rxn02713_d0	(1) (S)-Scoulerine[d0] + (1) S-Adenosyl-L-methionine[d0] <=> (1) H+[d0] + (1) Isocorypalmine[d0] + (1) S-Adenosyl-L-homocysteine[d0]	2.1.1.117-RXN.c
rxn02716_c0	(1) Chlorophyllide[c0] + (1) NADP+[c0] <=> (1) H+[c0] + (1) NADPH[c0] + (1) Protochlorophyllide[c0]		R_R03845_c	R03845_c
rxn02716_d0	(1) Chlorophyllide[d0] + (1) NADP+[d0] <=> (1) H+[d0] + (1) NADPH[d0] + (1) Protochlorophyllide[d0]		R_R03845_c	R03845_c
rxn02717_c0	(1) Corticosterone[c0] + (1) NAD+[c0] <=> (1) 11-Dehydrocorticosterone[c0] + (1) H+[c0] + (1) NADH[c0]		R_R03847_c	R03847_c
rxn02718_c0	(1) Corticosterone[c0] + (1) NADP+[c0] => (1) 11-Dehydrocorticosterone[c0] + (1) H+[c0] + (1) NADPH[c0]			R03848_c
rxn02719_c0	(1) Lauroyl-CoA[c0] + (1) NADP+[c0] <= (1) 2-trans-Dodecenoyl-CoA[c0] + (1) H+[c0] + (1) NADPH[c0]	TRANSENOYLCOARED-RXN.c.araexp.CPD-7222_LAUROYLCOA-CPD
rxn02720_c0	(1) FAD[c0] + (1) H+[c0] + (1) Lauroyl-CoA[c0] <=> (1) 2-trans-Dodecenoyl-CoA[c0] + (1) FADH2[c0]
rxn02728_c0	(1) Maleylpyruvate[c0] => (1) 3-Fumarylpyruvate[c0]
rxn02729_c0	(1) (S)-Methylmalonate semialdehyde[c0] + (1) H2O[c0] + (1) NAD+[c0] <=> (2) H+[c0] + (1) Methylmalonate[c0] + (1) NADH[c0]		R_R03869_c	R03869_c
rxn02729_d0	(1) (S)-Methylmalonate semialdehyde[d0] + (1) H2O[d0] + (1) NAD+[d0] <=> (2) H+[d0] + (1) Methylmalonate[d0] + (1) NADH[d0]		R_R03869_c	R03869_c
rxn02733_c0	(1) ATP[c0] + (1) H2O[c0] + (1) Magnesium cation[c0] + (1) Protoporphyrin[c0] <=> (1) ADP[c0] + (3) H+[c0] + (1) Magnesium protoporphyrin[c0] + (1) Orthophosphate[c0]		R_R03877_c	R03877_c
rxn02735_c0	(1) NADP+[c0] + (1) UDP-L-rhamnose[c0] <=> (1) H+[c0] + (1) NADPH[c0] + (1) UDP-4-dehydro-6-deoxy-D-glucose[c0]	RXN-5481.c
rxn02747_c0	(1) H2O[c0] + (1) cis-4-Carboxymethylenebut-2-en-4-olide[c0] => (1) 2-Maleylacetate[c0] + (1) H+[c0]
rxn02749_c0	(1) (R)-2-Methylmalate[c0] <=> (1) 2-Methylmaleate[c0] + (1) H2O[c0]
rxn02751_c0	(1) 2-Methylmaleate[c0] + (1) H2O[c0] <=> (1) D-erythro-3-Methylmalate[c0]
rxn02752_c0	(1) H2O[c0] + (1) N1-Acetylspermine[c0] + (1) Oxygen[c0] <=> (1) 3-Acetamidopropanal[c0] + (1) Hydrogen peroxide[c0] + (1) Spermidine[c0]	RXN-12090.c
rxn02752_x0	(1) H2O[x0] + (1) N1-Acetylspermine[x0] + (1) Oxygen[x0] => (1) 3-Acetamidopropanal[x0] + (1) Hydrogen peroxide[x0] + (1) Spermidine[x0]	RXN-12090.c
rxn02758_c0	(1) NADP+[c0] + (1) Sinapyl alcohol[c0] <=> (1) H+[c0] + (1) NADPH[c0] + (1) Sinapoyl aldehyde[c0]	RXN-1125.c	R_R03918_c	R03918_c
rxn02758_w0	(1) NADP+[w0] + (1) Sinapyl alcohol[w0] <=> (1) H+[w0] + (1) NADPH[w0] + (1) Sinapoyl aldehyde[w0]	RXN-1125.c	R_R03918_c	R03918_c
rxn02760_c0	(1) H2O[c0] + (1) Sucrose 6-phosphate[c0] => (1) alpha-D-Glucose 6-phosphate[c0] + (1) beta-D-Fructose[c0]
rxn02760_v0	(1) H2O[v0] + (1) Sucrose 6-phosphate[v0] => (1) alpha-D-Glucose 6-phosphate[v0] + (1) beta-D-Fructose[v0]
rxn02760_w0	(1) H2O[w0] + (1) Sucrose 6-phosphate[w0] => (1) alpha-D-Glucose 6-phosphate[w0] + (1) beta-D-Fructose[w0]
rxn02771_c0	(1) N-Methyltyramine[c0] + (1) S-Adenosyl-L-methionine[c0] => (1) H+[c0] + (1) Hordenine[c0] + (1) S-Adenosyl-L-homocysteine[c0]		R_R03943_c	R03943_c
rxn02771_d0	(1) N-Methyltyramine[d0] + (1) S-Adenosyl-L-methionine[d0] => (1) H+[d0] + (1) Hordenine[d0] + (1) S-Adenosyl-L-homocysteine[d0]		R_R03943_c	R03943_c
rxn02771_m0	(1) N-Methyltyramine[m0] + (1) S-Adenosyl-L-methionine[m0] => (1) H+[m0] + (1) Hordenine[m0] + (1) S-Adenosyl-L-homocysteine[m0]		R_R03943_c	R03943_c
rxn02771_n0	(1) N-Methyltyramine[n0] + (1) S-Adenosyl-L-methionine[n0] => (1) H+[n0] + (1) Hordenine[n0] + (1) S-Adenosyl-L-homocysteine[n0]		R_R03943_c	R03943_c
rxn02773_c0	(1) 3'-Phosphoadenylyl sulfate[c0] + (1) Phenolic steroid[c0] => (1) Adenosine 3',5'-bisphosphate[c0] + (1) H+[c0] + (1) Steroid O-sulfate[c0]	STEROID-SULFOTRANSFERASE-RXN.c
rxn02774_c0	(1) NAD+[c0] + (1) Precorrin 2[c0] <=> (2) H+[c0] + (1) NADH[c0] + (1) Sirohydrochlorin[c0]	DIMETHUROPORDEHYDROG-RXN.c
rxn02780_c0	(1) H2O[c0] + (1) Xanthurenic acid[c0] <= (1) 4-(2-Amino-3-hydroxyphenyl)-2,4-dioxobutanoate[c0]	RXN-10722.c
rxn02781_c0	(1) S-Adenosyl-L-methionine[c0] + (1) Xanthurenic acid[c0] <=> (1) 8-Methoxykynurenate[c0] + (1) H+[c0] + (1) S-Adenosyl-L-homocysteine[c0]
rxn02789_c0	(1) alpha-Isopropylmalate[c0] <=> (1) 2-Isopropylmaleate[c0] + (1) H2O[c0]	3-ISOPROPYLMALISOM-RXN.c	R_R03968_c	R03968_c
rxn02791_c0	(1) 3-Cyano-L-alanine[c0] + (1) L-Glutamate[c0] <=> (1) H2O[c0] + (1) gamma-Glutamyl-beta-cyanoalanine[c0]		R_R03970_c	R03970_c
rxn02791_v0	(1) 3-Cyano-L-alanine[v0] + (1) L-Glutamate[v0] <=> (1) H2O[v0] + (1) gamma-Glutamyl-beta-cyanoalanine[v0]		R_R03970_c	R03970_c
rxn02802_c0	(1) NADP+[c0] + (1) Tetradecanoyl-CoA[c0] <= (1) H+[c0] + (1) NADPH[c0] + (1) trans-Tetradec-2-enoyl-CoA[c0]
rxn02803_c0	(1) FAD[c0] + (1) H+[c0] + (1) Tetradecanoyl-CoA[c0] <=> (1) FADH2[c0] + (1) trans-Tetradec-2-enoyl-CoA[c0]
rxn02804_c0	(1) Acetyl-CoA[c0] + (1) Tetradecanoyl-CoA[c0] <=> (1) 3-Oxopalmitoyl-CoA[c0] + (1) CoA[c0]
rxn02807_c0	(1) 2,4-Dichlorophenol[c0] + (1) H+[c0] + (1) NADPH[c0] + (1) Oxygen[c0] => (1) 3,5-Dichlorocatechol[c0] + (1) H2O[c0] + (1) NADP+[c0]	24-DICHLOROPHENOL-6-MONOOXYGENASE-RXN.c
rxn02811_c0	(1) (2R,3S)-3-Isopropylmalate[c0] <=> (1) 2-Isopropylmaleate[c0] + (1) H2O[c0]	RXN-8991.c	R_R04001_c	R04001_c
rxn02814_c0	(1) 4-Hydroxycinnamyl aldehyde[c0] + (1) H+[c0] + (1) NADPH[c0] <=> (1) 4-Coumaryl alcohol[c0] + (1) NADP+[c0]	RXN-1102.c	R_R04004_c|R_R07437_c	R04004_c|R07437_c
rxn02814_w0	(1) 4-Hydroxycinnamyl aldehyde[w0] + (1) H+[w0] + (1) NADPH[w0] <=> (1) 4-Coumaryl alcohol[w0] + (1) NADP+[w0]	RXN-1102.c	R_R04004_c|R_R07437_c	R04004_c|R07437_c
rxn02815_c0	(1) 4-Coumaryl alcohol[c0] + (1) UDP-glucose[c0] <=> (1) 4-Hydroxycinnamyl alcohol 4-D-glucoside[c0] + (1) UDP[c0]			R04005_c
rxn02816_c0	(1) 4-Hydroxycinnamyl alcohol 4-D-glucoside[c0] + (1) H2O[c0] => (1) 4-Coumaryl alcohol[c0] + (1) D-Glucose[c0]
rxn02818_c0	(1) Benzyl thiocyanate[c0] => (1) Benzyl isothiocyanate[c0]
rxn02823_c0	(1) (Indol-3-yl)acetamide[c0] <=> (1) 3-Indoleacetonitrile[c0] + (1) H2O[c0]	RXN-7567.c
rxn02823_n0	(1) (Indol-3-yl)acetamide[n0] <=> (1) 3-Indoleacetonitrile[n0] + (1) H2O[n0]	RXN-7567.c
rxn02828_c0	(1) N-Methylputrescine[c0] + (1) Oxygen[c0] => (1) 1-Methylpyrrolinium[c0] + (1) Hydrogen peroxide[c0] + (1) NH3[c0]		R_R04027_c	R04027_c
rxn02828_x0	(1) N-Methylputrescine[x0] + (1) Oxygen[x0] => (1) 1-Methylpyrrolinium[x0] + (1) Hydrogen peroxide[x0] + (1) NH3[x0]		R_R04027_c	R04027_c
rxn02831_c0	(1) 2-Succinylbenzoate[c0] + (1) ATP[c0] + (1) CoA[c0] => (1) 2-Succinylbenzoyl-CoA[c0] + (1) AMP[c0] + (1) Diphosphate[c0] + (1) H+[c0]	O-SUCCINYLBENZOATE-COA-LIG-RXN.c
rxn02831_d0	(1) 2-Succinylbenzoate[d0] + (1) ATP[d0] + (1) CoA[d0] => (1) 2-Succinylbenzoyl-CoA[d0] + (1) AMP[d0] + (1) Diphosphate[d0] + (1) H+[d0]	O-SUCCINYLBENZOATE-COA-LIG-RXN.c
rxn02831_x0	(1) 2-Succinylbenzoate[x0] + (1) ATP[x0] + (1) CoA[x0] => (1) 2-Succinylbenzoyl-CoA[x0] + (1) AMP[x0] + (1) Diphosphate[x0] + (1) H+[x0]	O-SUCCINYLBENZOATE-COA-LIG-RXN.c
rxn02832_c0	(1) 2-Succinylbenzoate[c0] + (1) H2O[c0] <= (1) (1R,6R)-6-Hydroxy-2-succinylcyclohexa-2,4-diene-1-carboxylate[c0]	O-SUCCINYLBENZOATE-COA-SYN-RXN.c
rxn02834_c0	(1) 1-(5-Phospho-D-ribosyl)-ATP[c0] + (1) H2O[c0] => (1) Diphosphate[c0] + (2) H+[c0] + (1) Phosphoribosyl-AMP[c0]	HISTPRATPHYD-RXN.c	R_R04035_c	R04035_c
rxn02835_c0	(1) H2O[c0] + (1) Phosphoribosyl-AMP[c0] <=> (1) 5-(5-Phospho-D-ribosylaminoformimino)-1-(5-phosphoribosyl)-imidazole-4-carboxamide[c0]	HISTCYCLOHYD-RXN.c	R_R04037_c	R04037_c
rxn02836_c0	(1) AMP[c0] + (1) Dimethylallyl diphosphate[c0] <=> (1) Diphosphate[c0] + (1) H+[c0] + (1) N6-(delta2-Isopentenyl)-adenosine 5'-monophosphate[c0]
rxn02853_c0	(1) H2O[c0] + (1) Imidazole-4-acetaldehyde[c0] + (1) NAD+[c0] <=> (2) H+[c0] + (1) Imidazole-4-acetate[c0] + (1) NADH[c0]	RXN-10089.c	R_R04065_c	R04065_c
rxn02858_c0	(1) 3,4-Dihydroxyphenylacetaldehyde[c0] + (1) Dopamine[c0] <= (1) (S)-Norlaudanosoline[c0] + (1) H2O[c0]
rxn02864_c0	(1) Indole-3-acetaldehyde oxime[c0] => (1) 3-Indoleacetonitrile[c0] + (1) H2O[c0]			R04093_c
rxn02864_r0	(1) Indole-3-acetaldehyde oxime[r0] => (1) 3-Indoleacetonitrile[r0] + (1) H2O[r0]			R04093_c
rxn02866_c0	(1) 3-Methylbutanoyl-CoA[c0] + (1) FAD[c0] + (1) H+[c0] <=> (1) 3-Methylcrotonyl-CoA[c0] + (1) FADH2[c0]		R_R04095_c	R04095_c
rxn02866_x0	(1) 3-Methylbutanoyl-CoA[x0] + (1) FAD[x0] + (1) H+[x0] <=> (1) 3-Methylcrotonyl-CoA[x0] + (1) FADH2[x0]		R_R04095_c	R04095_c
rxn02869_c0	(1) 3-cis-Dodecenoyl-CoA[c0] <=> (1) 2-trans-Dodecenoyl-CoA[c0]	RXN-7931.c
rxn02869_x0	(1) 3-cis-Dodecenoyl-CoA[x0] <=> (1) 2-trans-Dodecenoyl-CoA[x0]	RXN-7931.c
rxn02887_c0	(1) 3-Hydroxybenzyl alcohol[c0] + (1) NADP+[c0] <= (1) 3-Hydroxybenzaldehyde[c0] + (1) H+[c0] + (1) NADPH[c0]
rxn02889_c0	(1) 3-Methylcrotonyl-CoA[c0] + (1) ATP[c0] + (1) HCO3-[c0] <=> (1) 3-Methylglutaconyl-CoA[c0] + (1) ADP[c0] + (1) H+[c0] + (1) Orthophosphate[c0]		R_R04138_c	R04138_c
rxn02894_c0	(1) 5-Methylthio-D-ribose[c0] + (1) ATP[c0] => (1) ADP[c0] + (1) H+[c0] + (1) S-Methyl-5-thio-D-ribose 1-phosphate[c0]	5-METHYLTHIORIBOSE-KINASE-RXN.c
rxn02895_c0	(1) 5-Phosphoribosylamine[c0] + (1) ATP[c0] + (1) Glycine[c0] => (1) 5'-Phosphoribosylglycinamide[c0] + (1) ADP[c0] + (1) H+[c0] + (1) Orthophosphate[c0]	GLYRIBONUCSYN-RXN.c	R_R04144_c	R04144_c
rxn02896_c0	(1) Isopenicillin N[c0] <=> (1) Penicillin N[c0]	5.1.1.17-RXN.c
rxn02909_c0	(1) 2-Carboxy-D-arabinitol 1-phosphate[c0] + (1) H2O[c0] <=> (1) Hamamelose[c0] + (1) Orthophosphate[c0]	2-CARBOXY-D-ARABINITOL-1-PHOSPHATASE-RXN.c|RXNQT-4399.c
rxn02911_c0	(1) (S)-3-Hydroxydodecanoyl-CoA[c0] <=> (1) 2-trans-Dodecenoyl-CoA[c0] + (1) H2O[c0]
rxn02913_c0	(1) 3-Hydroxy-L-kynurenine[c0] + (1) H+[c0] => (1) 3-Hydroxykynurenamine[c0] + (1) CO2[c0]		R_R04172_c	R04172_c
rxn02914_c0	(1) 2-Oxoglutarate[c0] + (1) O-Phospho-L-serine[c0] <=> (1) 3-Phosphonooxypyruvate[c0] + (1) L-Glutamate[c0]	PSERTRANSAM-RXN.c	R_R04173_c	R04173_c
rxn02926_c0	(1) 2-Oxoglutarate[c0] + (1) L-3-Amino-isobutanoate[c0] <=> (1) (S)-Methylmalonate semialdehyde[c0] + (1) L-Glutamate[c0]	2.6.1.22-RXN.c
rxn02928_c0	(1) 2,3,4,5-Tetrahydrodipicolinate[c0] + (1) NAD+[c0] <=> (1) H+[c0] + (1) L-2,3-Dihydrodipicolinate[c0] + (1) NADH[c0]	DIHYDROPICRED-RXN.c.araexp.NAD_NADH	R_R04198_c	R04198_c
rxn02929_c0	(1) 2,3,4,5-Tetrahydrodipicolinate[c0] + (1) NADP+[c0] <=> (1) H+[c0] + (1) L-2,3-Dihydrodipicolinate[c0] + (1) NADPH[c0]	DIHYDROPICRED-RXN.c.araexp.NADP_NADPH		R04199_c
rxn02933_c0	(1) (2S,3S)-3-Hydroxy-2-methylbutanoyl-CoA[c0] + (1) NAD+[c0] <=> (1) 2-Methylacetoacetyl-CoA[c0] + (1) H+[c0] + (1) NADH[c0]	1.1.1.178-RXN.c
rxn02934_c0	(1) (2S,3S)-3-Hydroxy-2-methylbutanoyl-CoA[c0] <=> (1) 2-Methylbut-2-enoyl-CoA[c0] + (1) H2O[c0]	TIGLYLCOA-HYDROXY-RXN.c	R_R04204_c	R04204_c
rxn02934_v0	(1) (2S,3S)-3-Hydroxy-2-methylbutanoyl-CoA[v0] <=> (1) 2-Methylbut-2-enoyl-CoA[v0] + (1) H2O[v0]	TIGLYLCOA-HYDROXY-RXN.c	R_R04204_c	R04204_c
rxn02937_c0	(1) 2-(Formamido)-N1-(5'-phosphoribosyl)acetamidine[c0] + (1) ATP[c0] <=> (1) ADP[c0] + (1) Aminoimidazole ribotide[c0] + (1) H+[c0] + (1) Orthophosphate[c0]	AIRS-RXN.c	R_R04208_c	R04208_c
rxn02938_c0	(1) 1-(5-Phospho-D-ribosyl)-5-amino-4-imidazolecarboxylate[c0] + (1) H+[c0] => (1) Aminoimidazole ribotide[c0] + (1) CO2[c0]	AIRCARBOXY-RXN.c	R_R04209_c	R04209_c
rxn02945_c0	(1) Prephytoene diphosphate[c0] <=> (1) 15-cis-Phytoene[c0] + (1) Diphosphate[c0] + (1) H+[c0]	RXNARA-8002.c
rxn02949_c0	(1) 2-Methylprop-2-enoyl-CoA[c0] + (1) H2O[c0] => (1) (S)-3-Hydroxyisobutyryl-CoA[c0]		R_R04224_c	R04224_c
rxn02959_c0	(1) Magnesium protoporphyrin[c0] + (1) S-Adenosyl-L-methionine[c0] <=> (1) Magnesium protoporphyrin monomethyl ester[c0] + (1) S-Adenosyl-L-homocysteine[c0]	RXN-MG-PROTOPORPHYRIN-METHYLESTER-SYN.c	R_R04237_c	R04237_c
rxn02961_c0	(1) 2-Aminoethylphosphonate[c0] + (1) CTP[c0] <=> (1) CMP-2-aminoethylphosphonate[c0] + (1) Diphosphate[c0] + (1) H+[c0]		R_R04247_c	R04247_c
rxn02977_c0	(1) H2O[c0] + (1) Methyl-2-alpha-L-fucopyranosyl-beta-D-galactoside[c0] <= (1) 6-Deoxy-L-galactose[c0] + (1) Methyl beta-D-galactoside[c0]
rxn02979_c0	(1) 2-Oxoglutarate[c0] + (1) Oxygen[c0] + (1) cis-3,4-Leucopelargonidin[c0] <=> (1) CO2[c0] + (1) H+[c0] + (2) H2O[c0] + (1) Pelargonidin[c0] + (1) Succinate[c0]	LEUCPEL-RXN.c	R_R04276_c	R04276_c
rxn02988_c0	(2) H2O[c0] + (1) Orthophosphate[c0] + (1) Quinolinate[c0] <=> (1) Glycerone phosphate[c0] + (1) Iminoaspartate[c0]	QUINOLINATE-SYNTHA-RXN.c	R_R04292_c	R04292_c
rxn02991_c0	(1) (S)-4-Hydroxymandelonitrile[c0] + (1) UDP-glucose[c0] <=> (1) Dhurrin[c0] + (1) UDP[c0]	RXN-743.c.araexp.CPD-12575
rxn02993_c0	(1) Dopamine[c0] + (1) H2O[c0] + (1) Oxygen[c0] => (1) 3,4-Dihydroxyphenylacetaldehyde[c0] + (1) Hydrogen peroxide[c0] + (1) NH3[c0]		R_R04300_c	R04300_c
rxn02993_x0	(1) Dopamine[x0] + (1) H2O[x0] + (1) Oxygen[x0] => (1) 3,4-Dihydroxyphenylacetaldehyde[x0] + (1) Hydrogen peroxide[x0] + (1) NH3[x0]		R_R04300_c	R04300_c
rxn02996_c0	(1) 4-Hydroxyphenylethanol[c0] + (1) NAD+[c0] <=> (1) 4-Hydroxyphenylacetaldehyde[c0] + (1) H+[c0] + (1) NADH[c0]	RXN3O-4113.c
rxn02998_c0	(1) (Z)-4-Hydroxyphenylacetaldehyde oxime[c0] => (1) 4-Hydroxyphenylacetonitrile[c0] + (1) H2O[c0]	RXN-12240.c
rxn03004_c0	(1) 10-Formyltetrahydrofolate[c0] + (1) 5'-Phosphoribosylglycinamide[c0] => (1) 5'-Phosphoribosyl-N-formylglycinamide[c0] + (1) H+[c0] + (1) Tetrahydrofolate[c0]	GART-RXN.c		R04325_c
rxn03005_c0	(1) 5'-Phosphoribosylglycinamide[c0] + (1) 5,10-Methenyltetrahydrofolate[c0] + (1) H2O[c0] <= (1) 5'-Phosphoribosyl-N-formylglycinamide[c0] + (2) H+[c0] + (1) Tetrahydrofolate[c0]		R_R04326_c	R04326_c
rxn03007_c0	(1) H+[c0] + (1) NADPH[c0] + (1) Zymosterol[c0] <=> (1) 5alpha-Cholest-8-en-3beta-ol[c0] + (1) NADP+[c0]		R_R07498_c	R07498_c
rxn03007_r0	(1) H+[r0] + (1) NADPH[r0] + (1) Zymosterol[r0] => (1) 5alpha-Cholest-8-en-3beta-ol[r0] + (1) NADP+[r0]		R_R07498_c	R07498_c
rxn03007_w0	(1) H+[w0] + (1) NADPH[w0] + (1) Zymosterol[w0] => (1) 5alpha-Cholest-8-en-3beta-ol[w0] + (1) NADP+[w0]		R_R07498_c	R07498_c
rxn03009_c0	(1) Indole-3-acetyl-beta-1-D-glucoside[c0] + (1) myo-Inositol[c0] => (1) D-Glucose[c0] + (1) Indole-3-acetyl-myo-inositol[c0]
rxn03010_c0	(1) Indole-3-acetyl-myo-inositol[c0] + (1) UDP-D-galactose[c0] => (1) 5-O-(Indol-3-ylacetyl-myo-inositol) D-galactoside[c0] + (1) UDP[c0]
rxn03012_c0	(1) L-2-Amino-6-oxoheptanedioate[c0] <=> (1) 2,3,4,5-Tetrahydrodipicolinate[c0] + (1) H+[c0] + (1) H2O[c0]	RXN-4821.c
rxn03016_c0	(1) H+[c0] + (1) NADPH[c0] + (1) Oxygen[c0] + (1) p-Coumaroyl quinic acid[c0] => (1) Chlorogenate[c0] + (1) H2O[c0] + (1) NADP+[c0]
rxn03022_c0	(1) H2O[c0] + (1) L-Mimosine[c0] => (1) 3,4-Dihydroxypyridine[c0] + (1) L-Serine[c0]
rxn03039_c0	(1) 1-(5'-Phosphoribosyl)-5-amino-4-imidazolecarboxamide[c0] + (1) Diphosphate[c0] + (1) H+[c0] <= (1) 5-Amino-4-imidazolecarboxyamide[c0] + (1) 5-Phospho-alpha-D-ribose 1-diphosphate[c0]		R_R04378_c	R04378_c
rxn03047_c0	(1) ATP[c0] + (1) N-((R)-Pantothenoyl)-L-cysteine[c0] => (1) (R)-4'-Phosphopantothenoyl-L-cysteine[c0] + (1) ADP[c0] + (1) H+[c0]
rxn03052_c0	(1) 5-Methyltetrahydropteroyltri-L-glutamate[c0] + (1) L-Homocysteine[c0] <=> (1) L-Methionine[c0] + (1) Tetrahydropteroyltri-L-glutamate[c0]		R_R04405_c	R04405_c
rxn03052_d0	(1) 5-Methyltetrahydropteroyltri-L-glutamate[d0] + (1) L-Homocysteine[d0] <=> (1) L-Methionine[d0] + (1) Tetrahydropteroyltri-L-glutamate[d0]		R_R04405_c	R04405_c
rxn03057_c0	(1) S-Methyl-5-thio-D-ribose 1-phosphate[c0] <=> (1) S-Methyl-5-thio-D-ribulose 1-phosphate[c0]	5.3.1.23-RXN.c
rxn03061_c0	(1) (2S,3R)-3-Hydroxybutane-1,2,3-tricarboxylate[c0] <=> (1) (Z)-But-2-ene-1,2,3-tricarboxylate[c0] + (1) H2O[c0]	4.2.1.99-RXN.c
rxn03062_c0	(1) (2R,3S)-3-Isopropylmalate[c0] + (1) NAD+[c0] <=> (1) (2S)-2-Isopropyl-3-oxosuccinate[c0] + (1) H+[c0] + (1) NADH[c0]	3-ISOPROPYLMALDEHYDROG-RXN.c	R_R04426_c	R04426_c
rxn03063_c0	(1) S-Adenosyl-L-methionine[c0] + (1) Zymosterol[c0] => (1) Fecosterol[c0] + (1) H+[c0] + (1) S-Adenosyl-L-homocysteine[c0]	RXN3O-178.c		R04427_c
rxn03068_c0	(1) (R)-2,3-Dihydroxy-3-methylbutanoate[c0] + (1) NADP+[c0] <=> (1) 3-Hydroxy-3-methyl-2-oxobutanoic acid[c0] + (1) H+[c0] + (1) NADPH[c0]		R_R04440_c	R04440_c
rxn03071_c0	(2) H2O[c0] + (1) L-1-Pyrroline-3-hydroxy-5-carboxylate[c0] + (1) NAD+[c0] <=> (1) H+[c0] + (1) L-erythro-4-Hydroxyglutamate[c0] + (1) NADH[c0]
rxn03072_c0	(2) H2O[c0] + (1) L-1-Pyrroline-3-hydroxy-5-carboxylate[c0] + (1) NADP+[c0] <=> (1) H+[c0] + (1) L-erythro-4-Hydroxyglutamate[c0] + (1) NADPH[c0]
rxn03075_c0	(1) 5-(2-Hydroxyethyl)-4-methylthiazole[c0] + (1) ATP[c0] => (1) 4-Methyl-5-(2-phosphoethyl)-thiazole[c0] + (1) ADP[c0] + (1) H+[c0]	THIAZOLSYN3-RXN.c	R_R04448_c	R04448_c
rxn03077_c0	(1) 2-Acetyl-1-alkyl-sn-glycero-3-phosphocholine[c0] + (1) H2O[c0] => (1) 1-Organyl-2-lyso-sn-glycero-3-phosphocholine[c0] + (1) Acetate[c0] + (1) H+[c0]
rxn03080_c0	(1) 5-Amino-6-(1-D-ribitylamino)uracil[c0] + (1) L-3,4-Dihydroxybutan-2-one 4-phosphate[c0] <=> (1) 6,7-Dimethyl-8-(D-ribityl)lumazine[c0] + (1) H+[c0] + (2) H2O[c0] + (1) Orthophosphate[c0]	LUMAZINESYN-RXN.c	R_R04457_c	R04457_c
rxn03082_c0	(1) H+[c0] + (1) N-Hydroxy-L-tyrosine[c0] + (1) NADPH[c0] + (1) Oxygen[c0] => (1) H2O[c0] + (1) N,N-Dihydroxy-L-tyrosine[c0] + (1) NADP+[c0]	RXN-7748.c
rxn03084_c0	(1) 5'-Phosphoribosyl-N-formylglycinamide[c0] + (1) ATP[c0] + (1) H2O[c0] + (1) L-Glutamine[c0] => (1) 2-(Formamido)-N1-(5'-phosphoribosyl)acetamidine[c0] + (1) ADP[c0] + (1) H+[c0] + (1) L-Glutamate[c0] + (1) Orthophosphate[c0]	FGAMSYN-RXN.c	R_R04463_c	R04463_c
rxn03091_c0	(1) Peptide 2-(3-carboxy-3-aminopropyl)-L-histidine[c0] + (1) S-Adenosyl-L-methionine[c0] => (1) H+[c0] + (1) Peptide 2-[3-carboxy-3-(methylammonio)propyl]-L-histidine[c0] + (1) S-Adenosyl-L-homocysteine[c0]
rxn03093_c0	(1) 3beta-Hydroxy-4beta-methyl-5alpha-cholest-7-ene-4alpha-carboxylate[c0] + (1) NAD+[c0] => (1) 4alpha-Methyl-5alpha-cholest-7-en-3-one[c0] + (1) CO2[c0] + (1) NADH[c0]	1.1.1.170-RXN.c.araexp.NAD_NADH
rxn03104_c0	(1) 4,4-Dimethyl-5alpha-cholest-7-en-3beta-ol[c0] + (1) H+[c0] + (1) NADH[c0] + (1) Oxygen[c0] <=> (1) 4beta-Hydroxymethyl-4alpha-methyl-5alpha-cholest-7-en-3beta-ol[c0] + (1) H2O[c0] + (1) NAD+[c0]	1.14.13.72-RXN.c.araexp.NAD_NADH
rxn03106_c0	(1) 3alpha,7alpha-Dihydroxy-5beta-cholestan-26-al[c0] + (1) H2O[c0] + (1) NAD+[c0] <=> (1) 3alpha,7alpha-Dihydroxy-5beta-cholestanate[c0] + (2) H+[c0] + (1) NADH[c0]		R_R04506_c	R04506_c
rxn03106_d0	(1) 3alpha,7alpha-Dihydroxy-5beta-cholestan-26-al[d0] + (1) H2O[d0] + (1) NAD+[d0] <=> (1) 3alpha,7alpha-Dihydroxy-5beta-cholestanate[d0] + (2) H+[d0] + (1) NADH[d0]		R_R04506_c	R04506_c
rxn03106_m0	(1) 3alpha,7alpha-Dihydroxy-5beta-cholestan-26-al[m0] + (1) H2O[m0] + (1) NAD+[m0] <=> (1) 3alpha,7alpha-Dihydroxy-5beta-cholestanate[m0] + (2) H+[m0] + (1) NADH[m0]		R_R04506_c	R04506_c
rxn03108_c0	(1) 4-Amino-2-methyl-5-phosphomethylpyrimidine[c0] + (1) ATP[c0] + (1) H+[c0] <=> (1) 2-Methyl-4-amino-5-hydroxymethylpyrimidine diphosphate[c0] + (1) ADP[c0]		R_R04509_c	R04509_c
rxn03108_m0	(1) 4-Amino-2-methyl-5-phosphomethylpyrimidine[m0] + (1) ATP[m0] + (1) H+[m0] <=> (1) 2-Methyl-4-amino-5-hydroxymethylpyrimidine diphosphate[m0] + (1) ADP[m0]		R_R04509_c	R04509_c
rxn03120_c0	(1) Apigenin 7-O-beta-D-glucoside[c0] + (1) UDP-apiose[c0] <=> (1) Apigenin 7-O-[beta-D-apiosyl-(1->2)-beta-D-glucoside][c0] + (1) UDP[c0]	FLAVONE-APIOSYLTRANSFERASE-RXN.c
rxn03130_c0	(1) H2O[c0] + (1) UDP-2,3-bis(3-hydroxytetradecanoyl)glucosamine[c0] => (2) H+[c0] + (1) Lipid X[c0] + (1) UMP[c0]	LIPIDXSYNTHESIS-RXN.c
rxn03135_c0	(1) L-Glutamine[c0] + (1) N-(5'-Phospho-D-1'-ribulosylformimino)-5-amino-1-(5''-phospho-D-ribosyl)-4-imidazolecarboxamide[c0] => (1) 1-(5'-Phosphoribosyl)-5-amino-4-imidazolecarboxamide[c0] + (1) D-erythro-1-(Imidazol-4-yl)glycerol 3-phosphate[c0] + (2) H+[c0] + (1) L-Glutamate[c0]	GLUTAMIDOTRANS-RXN.c	R_R04558_c	R04558_c
rxn03136_c0	(1) 1-(5'-Phosphoribosyl)-5-amino-4-(N-succinocarboxamide)-imidazole[c0] <=> (1) 1-(5'-Phosphoribosyl)-5-amino-4-imidazolecarboxamide[c0] + (1) Fumarate[c0]		R_R04559_c	R04559_c
rxn03137_c0	(1) 1-(5'-Phosphoribosyl)-5-amino-4-imidazolecarboxamide[c0] + (1) 10-Formyltetrahydrofolate[c0] => (1) 1-(5'-Phosphoribosyl)-5-formamido-4-imidazolecarboxamide[c0] + (1) Tetrahydrofolate[c0]	AICARTRANSFORM-RXN.c	R_R04560_c	R04560_c
rxn03146_c0	(1) H2O[c0] + (1) UDP-3-O-(3-hydroxytetradecanoyl)-N-acetylglucosamine[c0] <=> (1) Acetate[c0] + (1) UDP-3-O-(3-hydroxytetradecanoyl)-D-glucosamine[c0]	UDPACYLGLCNACDEACETYL-RXN.c
rxn03147_c0	(1) 1-(5-Phospho-D-ribosyl)-5-amino-4-imidazolecarboxylate[c0] + (1) ATP[c0] + (1) L-Aspartate[c0] => (1) 1-(5'-Phosphoribosyl)-5-amino-4-(N-succinocarboxamide)-imidazole[c0] + (1) ADP[c0] + (2) H+[c0] + (1) Orthophosphate[c0]		R_R04591_c	R04591_c
rxn03159_c0	(1) Lipid X[c0] + (1) UDP-2,3-bis(3-hydroxytetradecanoyl)glucosamine[c0] <=> (1) Lipid A disaccharide[c0] + (1) UDP[c0]	LIPIDADISACCHARIDESYNTH-RXN.c
rxn03167_c0	(1) 7,8-Dihydroneopterin 3'-triphosphate[c0] + (3) H2O[c0] <=> (1) 2-Amino-4-hydroxy-6-(D-erythro-1,2,3-trihydroxypropyl)-7,8-dihydropteridine[c0] + (3) H+[c0] + (3) Orthophosphate[c0]
rxn03168_c0	(1) 2-Amino-4-hydroxy-6-(D-erythro-1,2,3-trihydroxypropyl)-7,8-dihydropteridine[c0] + (1) Orthophosphate[c0] <=> (1) Dihydroneopterin phosphate[c0] + (1) H2O[c0]	DIHYDRONEOPTERIN-MONO-P-DEPHOS-RXN.c	R_R04621_c	R04621_c
rxn03168_n0	(1) 2-Amino-4-hydroxy-6-(D-erythro-1,2,3-trihydroxypropyl)-7,8-dihydropteridine[n0] + (1) Orthophosphate[n0] <=> (1) Dihydroneopterin phosphate[n0] + (1) H2O[n0]	DIHYDRONEOPTERIN-MONO-P-DEPHOS-RXN.c	R_R04621_c	R04621_c
rxn03173_c0	(1) 7,8-Dihydroneopterin 3'-triphosphate[c0] + (1) H2O[c0] => (1) Dihydroneopterin phosphate[c0] + (1) Diphosphate[c0] + (2) H+[c0]	H2NEOPTERINP3PYROPHOSPHOHYDRO-RXN.c	R_R04638_c	R04638_c
rxn03173_n0	(1) 7,8-Dihydroneopterin 3'-triphosphate[n0] + (1) H2O[n0] => (1) Dihydroneopterin phosphate[n0] + (1) Diphosphate[n0] + (2) H+[n0]	H2NEOPTERINP3PYROPHOSPHOHYDRO-RXN.c	R_R04638_c	R04638_c
rxn03174_c0	(1) 7,8-Dihydroneopterin 3'-triphosphate[c0] + (1) H2O[c0] <= (1) 2,5-Diamino-6-(5'-triphosphoryl-3',4'-trihydroxy-2'-oxopentyl)-amino-4-oxopyrimidine[c0]		R_R04639N_c	R04639N_c
rxn03175_c0	(1) 5-(5-Phospho-D-ribosylaminoformimino)-1-(5-phosphoribosyl)-imidazole-4-carboxamide[c0] + (1) H+[c0] <=> (1) N-(5'-Phospho-D-1'-ribulosylformimino)-5-amino-1-(5''-phospho-D-ribosyl)-4-imidazolecarboxamide[c0]	PRIBFAICARPISOM-RXN.c	R_R04640_c	R04640_c
rxn03181_c0	(1) ATP[c0] + (1) Lipid A disaccharide[c0] => (1) 2,3,2'3'-Tetrakis(3-hydroxytetradecanoyl)-D-glucosaminyl-1,6-beta-D-glucosamine 1,4'-bisphosphate[c0] + (1) ADP[c0] + (1) H+[c0]	TETRAACYLDISACC4KIN-RXN.c
rxn03182_c0	(1) 2,3,2'3'-Tetrakis(3-hydroxytetradecanoyl)-D-glucosaminyl-1,6-beta-D-glucosamine 1,4'-bisphosphate[c0] + (1) CMP-3-deoxy-D-manno-octulosonate[c0] => (1) 3-Deoxy-D-manno-octulosonyl-lipid IV(A)[c0] + (1) CMP[c0] + (1) H+[c0]	KDOTRANS-RXN.c	R_R04658_c	R04658_c
rxn03182_m0	(1) 2,3,2'3'-Tetrakis(3-hydroxytetradecanoyl)-D-glucosaminyl-1,6-beta-D-glucosamine 1,4'-bisphosphate[m0] + (1) CMP-3-deoxy-D-manno-octulosonate[m0] => (1) 3-Deoxy-D-manno-octulosonyl-lipid IV(A)[m0] + (1) CMP[m0] + (1) H+[m0]	KDOTRANS-RXN.c	R_R04658_c	R04658_c
rxn03190_c0	(2) CO2[c0] + (1) Zymosterol[c0] => (6) H+[c0] + (6) NADPH[c0] + (6) Oxygen[c0]
rxn03194_c0	(1) 2-(alpha-Hydroxyethyl)thiamine diphosphate[c0] + (1) 2-Oxobutanoate[c0] <=> (1) (S)-2-Aceto-2-hydroxybutanoate[c0] + (1) Thiamin diphosphate[c0]		R_R04673_c	R04673_c
rxn03203_c0	(1) trans-beta-D-Glucosyl-2-hydroxycinnamate[c0] <=> (1) cis-beta-D-Glucosyl-2-hydroxycinnamate[c0]	RXN-8035.c	R_R04686_c	R04686_c
rxn03213_c0	(1) NADP+[c0] + (1) Salutaridinol[c0] <=> (1) H+[c0] + (1) NADPH[c0] + (1) Salutaridine[c0]	1.1.1.248-RXN.c
rxn03224_c0	(1) 3-Hexaprenyl-4,5-dihydroxybenzoate[c0] + (1) S-Adenosyl-L-methionine[c0] <=> (1) 3-Hexaprenyl-4-hydroxy-5-methoxybenzoate[c0] + (1) H+[c0] + (1) S-Adenosyl-L-homocysteine[c0]	2.1.1.114-RXN.c|RXN-11757.c.araexp.3-HEXAPRENYL-4-HYDROXY-5-METHOXYBENZOATE_3-HEXAPRENYL-45-DIHYDROXYBENZOATE	R_R04711_c	R04711_c
rxn03231_c0	(1) Acetyl-CoA[c0] + (1) Salutaridinol[c0] => (1) 7-O-Acetylsalutaridinol[c0] + (1) CoA[c0]	2.3.1.150-RXN.c
rxn03239_c0	(1) (S)-3-Hydroxyhexadecanoyl-CoA[c0] + (1) NAD+[c0] <=> (1) 3-Oxopalmitoyl-CoA[c0] + (1) H+[c0] + (1) NADH[c0]
rxn03240_c0	(1) (S)-3-Hydroxyhexadecanoyl-CoA[c0] <=> (1) H2O[c0] + (1) trans-Hexadec-2-enoyl-CoA[c0]
rxn03241_c0	(1) (S)-3-Hydroxytetradecanoyl-CoA[c0] <=> (1) H2O[c0] + (1) trans-Tetradec-2-enoyl-CoA[c0]
rxn03242_c0	(1) (S)-3-Hydroxydodecanoyl-CoA[c0] + (1) NAD+[c0] <=> (1) 3-Oxododecanoyl-CoA[c0] + (1) H+[c0] + (1) NADH[c0]
rxn03243_c0	(1) Acetyl-CoA[c0] + (1) Decanoyl-CoA[c0] <=> (1) 3-Oxododecanoyl-CoA[c0] + (1) CoA[c0]
rxn03244_c0	(1) (S)-Hydroxydecanoyl-CoA[c0] + (1) NAD+[c0] <=> (1) 3-Oxodecanoyl-CoA[c0] + (1) H+[c0] + (1) NADH[c0]	RXN-12490.c
rxn03244_r0	(1) (S)-Hydroxydecanoyl-CoA[r0] + (1) NAD+[r0] <=> (1) 3-Oxodecanoyl-CoA[r0] + (1) H+[r0] + (1) NADH[r0]	RXN-12490.c
rxn03245_c0	(1) (S)-Hydroxydecanoyl-CoA[c0] <=> (1) H2O[c0] + (1) trans-Dec-2-enoyl-CoA[c0]	RXN-13616.c
rxn03245_r0	(1) (S)-Hydroxydecanoyl-CoA[r0] <=> (1) H2O[r0] + (1) trans-Dec-2-enoyl-CoA[r0]	RXN-13616.c
rxn03246_c0	(1) (S)-3-Hydroxyoctanoyl-CoA[c0] + (1) NAD+[c0] <=> (1) 3-Oxooctanoyl-CoA[c0] + (1) H+[c0] + (1) NADH[c0]
rxn03247_c0	(1) (S)-3-Hydroxyoctanoyl-CoA[c0] <=> (1) H2O[c0] + (1) trans-Oct-2-enoyl-CoA[c0]
rxn03248_c0	(1) Acetyl-CoA[c0] + (1) Hexanoyl-CoA[c0] <=> (1) 3-Oxooctanoyl-CoA[c0] + (1) CoA[c0]
rxn03249_c0	(1) (S)-Hydroxyhexanoyl-CoA[c0] + (1) NAD+[c0] <=> (1) 3-Oxohexanoyl-CoA[c0] + (1) H+[c0] + (1) NADH[c0]	RXN-12570.c
rxn03249_r0	(1) (S)-Hydroxyhexanoyl-CoA[r0] + (1) NAD+[r0] <=> (1) 3-Oxohexanoyl-CoA[r0] + (1) H+[r0] + (1) NADH[r0]	RXN-12570.c
rxn03250_c0	(1) (S)-Hydroxyhexanoyl-CoA[c0] <=> (1) H2O[c0] + (1) trans-Hex-2-enoyl-CoA[c0]
rxn03251_c0	(1) FAD[c0] + (1) H+[c0] + (1) Hexanoyl-CoA[c0] <=> (1) FADH2[c0] + (1) trans-Hex-2-enoyl-CoA[c0]
rxn03252_c0	(1) Decanoyl-CoA[c0] + (1) NADP+[c0] <= (1) H+[c0] + (1) NADPH[c0] + (1) trans-Dec-2-enoyl-CoA[c0]	TRANSENOYLCOARED-RXN.c.araexp.CPD-10267_T2-DECENOYL-COA
rxn03253_c0	(1) Decanoyl-CoA[c0] + (1) FAD[c0] + (1) H+[c0] <=> (1) FADH2[c0] + (1) trans-Dec-2-enoyl-CoA[c0]
rxn03263_c0	(1) H2O[c0] + (1) L-Selenomethionine[c0] <=> (1) 2-Oxobutanoate[c0] + (1) Methaneselenol[c0] + (1) NH3[c0]
rxn03264_c0	(1) ATP[c0] + (1) H2O[c0] + (1) L-Selenomethionine[c0] => (1) Diphosphate[c0] + (1) H+[c0] + (1) Orthophosphate[c0] + (1) Se-Adenosylselenomethionine[c0]		R_R04771_c	R04771_c
rxn03264_n0	(1) ATP[n0] + (1) H2O[n0] + (1) L-Selenomethionine[n0] => (1) Diphosphate[n0] + (1) H+[n0] + (1) Orthophosphate[n0] + (1) Se-Adenosylselenomethionine[n0]		R_R04771_c	R04771_c
rxn03265_c0	(1) L-Selenomethionine[c0] + (1) S-Adenosyl-L-methionine[c0] => (1) S-Adenosyl-L-homocysteine[c0] + (1) Se-Methylselenomethionine[c0]	RXN-11062.c	R_R04772_c	R04772_c
rxn03273_c0	(1) 3-Ketolactose[c0] + (1) H2O[c0] => (1) 3-Keto-beta-D-galactose[c0] + (1) beta-D-Glucose[c0]	KETOLACTOSE-RXN.c	R_R04783_c	R04783_c
rxn03273_d0	(1) 3-Ketolactose[d0] + (1) H2O[d0] => (1) 3-Keto-beta-D-galactose[d0] + (1) beta-D-Glucose[d0]	KETOLACTOSE-RXN.c	R_R04783_c	R04783_c
rxn03281_c0	(1) Zymosterol[c0] => (1) 5alpha-Cholesta-7,24-dien-3beta-ol[c0]	RXN66-320.c	R_R04804_c	R04804_c
rxn03282_c0	(1) 3alpha,7alpha,26-Trihydroxy-5beta-cholestane[c0] + (1) NAD+[c0] <=> (1) 3alpha,7alpha-Dihydroxy-5beta-cholestan-26-al[c0] + (1) H+[c0] + (1) NADH[c0]		R_R04805_c	R04805_c
rxn03333_c0	(1) 3,4-Dihydroxyphenylethyleneglycol[c0] + (1) NAD+[c0] <=> (1) 3,4-Dihydroxymandelaldehyde[c0] + (1) H+[c0] + (1) NADH[c0]	RXN-10911.c	R_R04880_c	R04880_c
rxn03334_c0	(1) 3,4-Dihydroxyphenylethyleneglycol[c0] + (1) S-Adenosyl-L-methionine[c0] <= (1) 3-Methoxy-4-hydroxyphenylethyleneglycol[c0] + (1) H+[c0] + (1) S-Adenosyl-L-homocysteine[c0]
rxn03335_c0	(1) 3,4-Dihydroxymandelaldehyde[c0] + (1) H2O[c0] + (1) NAD+[c0] <=> (1) 3,4-Dihydroxymandelate[c0] + (2) H+[c0] + (1) NADH[c0]	RXN-10912.c
rxn03335_d0	(1) 3,4-Dihydroxymandelaldehyde[d0] + (1) H2O[d0] + (1) NAD+[d0] <=> (1) 3,4-Dihydroxymandelate[d0] + (2) H+[d0] + (1) NADH[d0]	RXN-10912.c
rxn03339_c0	(1) 3,4-Dihydroxymandelate[c0] + (1) S-Adenosyl-L-methionine[c0] => (1) 3-Methoxy-4-hydroxymandelate[c0] + (1) H+[c0] + (1) S-Adenosyl-L-homocysteine[c0]
rxn03343_c0	(1) 3-Methoxy-4-hydroxyphenylglycolaldehyde[c0] + (1) H2O[c0] + (1) NAD+[c0] <=> (1) 3-Methoxy-4-hydroxymandelate[c0] + (2) H+[c0] + (1) NADH[c0]	RXN-10917.c
rxn03343_d0	(1) 3-Methoxy-4-hydroxyphenylglycolaldehyde[d0] + (1) H2O[d0] + (1) NAD+[d0] <=> (1) 3-Methoxy-4-hydroxymandelate[d0] + (2) H+[d0] + (1) NADH[d0]	RXN-10917.c
rxn03343_m0	(1) 3-Methoxy-4-hydroxyphenylglycolaldehyde[m0] + (1) H2O[m0] + (1) NAD+[m0] <=> (1) 3-Methoxy-4-hydroxymandelate[m0] + (2) H+[m0] + (1) NADH[m0]	RXN-10917.c
rxn03351_c0	(1) Quercetin 3-O-glucoside[c0] + (1) UDP-L-rhamnose[c0] => (1) Rutin[c0] + (1) UDP[c0]			R04900_c
rxn03352_c0	(1) Luteoforol[c0] + (1) NADP+[c0] <=> (1) Eriodictyol[c0] + (1) H+[c0] + (1) NADPH[c0]			R04901_c
rxn03353_c0	(1) Eriodictyol[c0] + (1) H+[c0] + (1) NADPH[c0] + (1) Oxygen[c0] => (1) H2O[c0] + (1) NADP+[c0] + (1) Pentahydroxyflavanone[c0]	RXN-7921.c
rxn03354_c0	(1) 5-Hydroxyindoleacetaldehyde[c0] + (1) H2O[c0] + (1) NAD+[c0] <=> (1) 5-Hydroxyindoleacetate[c0] + (2) H+[c0] + (1) NADH[c0]	RXN-10780.c	R_R04903_c	R04903_c
rxn03361_c0	(1) 5-(3'-Carboxy-3'-oxopropenyl)-4,6-dihydroxypicolinate[c0] + (1) H+[c0] + (1) NADPH[c0] => (1) 5-(3'-Carboxy-3'-oxopropyl)-4,6-dihydroxypicolinate[c0] + (1) NADP+[c0]		R_R04910_c	R04910_c
rxn03361_d0	(1) 5-(3'-Carboxy-3'-oxopropenyl)-4,6-dihydroxypicolinate[d0] + (1) H+[d0] + (1) NADPH[d0] => (1) 5-(3'-Carboxy-3'-oxopropyl)-4,6-dihydroxypicolinate[d0] + (1) NADP+[d0]		R_R04910_c	R04910_c
rxn03372_c0	(1) ATP[c0] + (1) Adenylylselenate[c0] <=> (1) 3'-Phosphoadenylylselenate[c0] + (1) ADP[c0] + (1) H+[c0]		R_R04928_c	R04928_c
rxn03372_d0	(1) ATP[d0] + (1) Adenylylselenate[d0] => (1) 3'-Phosphoadenylylselenate[d0] + (1) ADP[d0] + (1) H+[d0]		R_R04928_c	R04928_c
rxn03372_n0	(1) ATP[n0] + (1) Adenylylselenate[n0] => (1) 3'-Phosphoadenylylselenate[n0] + (1) ADP[n0] + (1) H+[n0]		R_R04928_c	R04928_c
rxn03373_c0	(1) ATP[c0] + (1) Selenate[c0] => (1) Adenylylselenate[c0] + (1) Diphosphate[c0] + (1) H+[c0]	RXN-12720.c	R_R04929_c	R04929_c
rxn03373_n0	(1) ATP[n0] + (1) Selenate[n0] => (1) Adenylylselenate[n0] + (1) Diphosphate[n0] + (1) H+[n0]	RXN-12720.c	R_R04929_c	R04929_c
rxn03378_c0	(1) H2O[c0] + (1) Se-Adenosyl-L-selenohomocysteine[c0] <=> (1) Adenosine[c0] + (1) Selenohomocysteine[c0]		R_R04936_c	R04936_c
rxn03379_c0	(1) H2O[c0] + (1) L-Selenocystathionine[c0] <=> (1) NH3[c0] + (1) Pyruvate[c0] + (1) Selenohomocysteine[c0]	RXN-12729.c	R_R04941_c	R04941_c
rxn03379_d0	(1) H2O[d0] + (1) L-Selenocystathionine[d0] <=> (1) NH3[d0] + (1) Pyruvate[d0] + (1) Selenohomocysteine[d0]	RXN-12729.c	R_R04941_c	R04941_c
rxn03382_c0	(1) L-Selenocysteine[c0] + (1) O-Acetyl-L-homoserine[c0] <=> (1) Acetate[c0] + (1) H+[c0] + (1) L-Selenocystathionine[c0]
rxn03383_c0	(1) L-Selenocysteine[c0] + (1) O-Succinyl-L-homoserine[c0] <=> (1) H+[c0] + (1) L-Selenocystathionine[c0] + (1) Succinate[c0]
rxn03384_c0	(4) H+[c0] + (1) Uroporphyrinogen I[c0] => (4) CO2[c0] + (1) Coproporphyrinogen I[c0]	RXN-10642.c	R_R04972_c	R04972_c
rxn03390_c0	(1) 2-Hexaprenyl-6-methoxyphenol[c0] + (1) Oxygen[c0] => (1) 2-Hexaprenyl-6-methoxy-1,4-benzoquinone[c0] + (1) H2O[c0]		R_R04982_c	R04982_c
rxn03390_d0	(1) 2-Hexaprenyl-6-methoxyphenol[d0] + (1) Oxygen[d0] => (1) 2-Hexaprenyl-6-methoxy-1,4-benzoquinone[d0] + (1) H2O[d0]		R_R04982_c	R04982_c
rxn03390_r0	(1) 2-Hexaprenyl-6-methoxyphenol[r0] + (1) Oxygen[r0] => (1) 2-Hexaprenyl-6-methoxy-1,4-benzoquinone[r0] + (1) H2O[r0]		R_R04982_c	R04982_c
rxn03391_c0	(1) 2-Hexaprenyl-6-methoxy-1,4-benzoquinone[c0] + (1) S-Adenosyl-L-methionine[c0] => (1) 2-Hexaprenyl-3-methyl-6-methoxy-1,4-benzoquinone[c0] + (1) H+[c0] + (1) S-Adenosyl-L-homocysteine[c0]		R_R04983_c	R04983_c
rxn03391_d0	(1) 2-Hexaprenyl-6-methoxy-1,4-benzoquinone[d0] + (1) S-Adenosyl-L-methionine[d0] => (1) 2-Hexaprenyl-3-methyl-6-methoxy-1,4-benzoquinone[d0] + (1) H+[d0] + (1) S-Adenosyl-L-homocysteine[d0]		R_R04983_c	R04983_c
rxn03391_n0	(1) 2-Hexaprenyl-6-methoxy-1,4-benzoquinone[n0] + (1) S-Adenosyl-L-methionine[n0] => (1) 2-Hexaprenyl-3-methyl-6-methoxy-1,4-benzoquinone[n0] + (1) H+[n0] + (1) S-Adenosyl-L-homocysteine[n0]		R_R04983_c	R04983_c
rxn03394_c0	(1) 2-Octaprenylphenol[c0] + (1) H+[c0] + (1) NADPH[c0] + (1) Oxygen[c0] => (1) 2-Octaprenyl-6-hydroxyphenol[c0] + (1) H2O[c0] + (1) NADP+[c0]	2-OCTAPRENYLPHENOL-HYDROX-RXN.c
rxn03394_d0	(1) 2-Octaprenylphenol[d0] + (1) H+[d0] + (1) NADPH[d0] + (1) Oxygen[d0] => (1) 2-Octaprenyl-6-hydroxyphenol[d0] + (1) H2O[d0] + (1) NADP+[d0]	2-OCTAPRENYLPHENOL-HYDROX-RXN.c
rxn03397_c0	(1) 2-Octaprenyl-6-methoxy-1,4-benzoquinone[c0] + (1) S-Adenosyl-L-methionine[c0] => (1) 2-Octaprenyl-3-methyl-6-methoxy-1,4-benzoquinone[c0] + (1) H+[c0] + (1) S-Adenosyl-L-homocysteine[c0]		R_R04990_c	R04990_c
rxn03397_d0	(1) 2-Octaprenyl-6-methoxy-1,4-benzoquinone[d0] + (1) S-Adenosyl-L-methionine[d0] => (1) 2-Octaprenyl-3-methyl-6-methoxy-1,4-benzoquinone[d0] + (1) H+[d0] + (1) S-Adenosyl-L-homocysteine[d0]		R_R04990_c	R04990_c
rxn03397_m0	(1) 2-Octaprenyl-6-methoxy-1,4-benzoquinone[m0] + (1) S-Adenosyl-L-methionine[m0] => (1) 2-Octaprenyl-3-methyl-6-methoxy-1,4-benzoquinone[m0] + (1) H+[m0] + (1) S-Adenosyl-L-homocysteine[m0]		R_R04990_c	R04990_c
rxn03397_n0	(1) 2-Octaprenyl-6-methoxy-1,4-benzoquinone[n0] + (1) S-Adenosyl-L-methionine[n0] => (1) 2-Octaprenyl-3-methyl-6-methoxy-1,4-benzoquinone[n0] + (1) H+[n0] + (1) S-Adenosyl-L-homocysteine[n0]		R_R04990_c	R04990_c
rxn03403_c0	(1) H+[c0] + (1) cis-2-Hydroxycinnamate[c0] => (1) Coumarin[c0] + (1) H2O[c0]	RXN-8037.c
rxn03408_c0	(1) UDP-N-acetyl-D-glucosamine[c0] + (1) Undecaprenyl-diphospho-N-acetylmuramoyl-L-alanyl-D-glutamyl-meso-2,6-diaminopimeloyl-D-alanyl-D-alanine[c0] <=> (1) UDP[c0] + (1) Undecaprenyl-diphospho-N-acetylmuramoyl-(N-acetylglucosamine)-L-alanyl-D-glutamyl-meso-2,6-diaminopimeloyl-D-alanyl-D-alanine[c0]		R_R05032_c	R05032_c
rxn03410_c0	(1) Kaempferol[c0] + (1) S-Adenosyl-L-methionine[c0] <=> (1) 3-Methoxyapigenin[c0] + (1) H+[c0] + (1) S-Adenosyl-L-homocysteine[c0]		R_R05035_c	R05035_c
rxn03410_n0	(1) Kaempferol[n0] + (1) S-Adenosyl-L-methionine[n0] <=> (1) 3-Methoxyapigenin[n0] + (1) H+[n0] + (1) S-Adenosyl-L-homocysteine[n0]		R_R05035_c	R05035_c
rxn03411_c0	(1) CO2[c0] + (1) Cyanidin[c0] + (1) H+[c0] + (2) H2O[c0] + (1) Succinate[c0] <=> (1) 2-Oxoglutarate[c0] + (1) Leucocyanidin[c0] + (1) Oxygen[c0]	RXN-602.c	R_R05036_c	R05036_c
rxn03412_c0	(1) CO2[c0] + (1) Delphinidin[c0] + (1) H+[c0] + (2) H2O[c0] + (1) Succinate[c0] <=> (1) 2-Oxoglutarate[c0] + (1) Leucodelphinidin[c0] + (1) Oxygen[c0]	RXN-7785.c	R_R05037_c	R05037_c
rxn03413_c0	(1) Leucodelphinidin[c0] + (1) NADP+[c0] <=> (1) Dihydromyricetin[c0] + (1) H+[c0] + (1) NADPH[c0]	RXN-7784.c	R_R05038_c	R05038_c
rxn03414_c0	(1) 2-Oxoglutarate[c0] + (1) Oxygen[c0] + (1) Pentahydroxyflavanone[c0] => (1) CO2[c0] + (1) Dihydromyricetin[c0] + (1) Succinate[c0]	RXN-7922.c	R_R05039_c	R05039_c
rxn03419_c0	(1) Formamidopyrimidine nucleoside triphosphate[c0] + (1) H2O[c0] <=> (1) 2,5-Diaminopyrimidine nucleoside triphosphate[c0] + (1) Formate[c0] + (1) H+[c0]		R_R05046_c	R05046_c
rxn03421_c0	(1) 2,5-Diaminopyrimidine nucleoside triphosphate[c0] <=> (1) 2,5-Diamino-6-(5'-triphosphoryl-3',4'-trihydroxy-2'-oxopentyl)-amino-4-oxopyrimidine[c0]		R_R05048_c	R05048_c
rxn03422_c0	(1) H2O[c0] + (1) N-Succinyl-L-glutamate 5-semialdehyde[c0] + (1) NAD+[c0] <=> (2) H+[c0] + (1) N-Succinyl-L-glutamate[c0] + (1) NADH[c0]	SUCCGLUALDDEHYD-RXN.c
rxn03423_c0	(1) H2O[c0] + (1) N4-Acetylaminobutanal[c0] + (1) NAD+[c0] <=> (1) 4-Acetamidobutanoate[c0] + (2) H+[c0] + (1) NADH[c0]	RXN-37.c	R_R05050_c	R05050_c
rxn03424_c0	(2) H+[c0] + (1) L-erythro-4-Hydroxyglutamate[c0] + (1) NADH[c0] <=> (1) H2O[c0] + (1) L-4-Hydroxyglutamate semialdehyde[c0] + (1) NAD+[c0]
rxn03433_c0	(1) (S)-3-Hydroxyisobutyryl-CoA[c0] + (1) H2O[c0] => (1) (S)-3-Hydroxyisobutyrate[c0] + (1) CoA[c0] + (1) H+[c0]
rxn03433_x0	(1) (S)-3-Hydroxyisobutyryl-CoA[x0] + (1) H2O[x0] => (1) (S)-3-Hydroxyisobutyrate[x0] + (1) CoA[x0] + (1) H+[x0]
rxn03435_c0	(1) (R)-2,3-Dihydroxy-3-methylpentanoate[c0] + (1) NADP+[c0] <=> (1) (R)-3-Hydroxy-3-methyl-2-oxopentanoate[c0] + (1) H+[c0] + (1) NADPH[c0]		R_R05068_c	R05068_c
rxn03436_c0	(1) (S)-2-Aceto-2-hydroxybutanoate[c0] <=> (1) (R)-3-Hydroxy-3-methyl-2-oxopentanoate[c0]		R_R05069_c	R05069_c
rxn03437_c0	(1) (R)-2,3-Dihydroxy-3-methylpentanoate[c0] => (1) (S)-3-Methyl-2-oxopentanoic acid[c0] + (1) H2O[c0]		R_R05070_c	R05070_c
rxn03439_c0	(1) 3-Deoxy-D-manno-octulosonyl-lipid IV(A)[c0] + (1) CMP-3-deoxy-D-manno-octulosonate[c0] => (1) CMP[c0] + (1) Di[3-deoxy-D-manno-octulosonyl]-lipid IV(A)[c0] + (1) H+[c0]	KDOTRANS2-RXN.c	R_R05074_c	R05074_c
rxn03439_m0	(1) 3-Deoxy-D-manno-octulosonyl-lipid IV(A)[m0] + (1) CMP-3-deoxy-D-manno-octulosonate[m0] => (1) CMP[m0] + (1) Di[3-deoxy-D-manno-octulosonyl]-lipid IV(A)[m0] + (1) H+[m0]	KDOTRANS2-RXN.c	R_R05074_c	R05074_c
rxn03445_c0	(1) 2-Oxoglutarate[c0] + (1) O-Phospho-4-hydroxy-L-threonine[c0] <=> (1) 2-Oxo-3-hydroxy-4-phosphobutanoate[c0] + (1) L-Glutamate[c0]		R_R05085_c	R05085_c
rxn03445_d0	(1) 2-Oxoglutarate[d0] + (1) O-Phospho-4-hydroxy-L-threonine[d0] <=> (1) 2-Oxo-3-hydroxy-4-phosphobutanoate[d0] + (1) L-Glutamate[d0]		R_R05085_c	R05085_c
rxn03446_c0	(1) H2O[c0] + (1) O-Phospho-4-hydroxy-L-threonine[c0] <=> (1) 4-Hydroxy-L-threonine[c0] + (1) Orthophosphate[c0]		R_R05086_c	R05086_c
rxn03446_d0	(1) H2O[d0] + (1) O-Phospho-4-hydroxy-L-threonine[d0] <=> (1) 4-Hydroxy-L-threonine[d0] + (1) Orthophosphate[d0]		R_R05086_c	R05086_c
rxn03452_c0	(1) ent-Copalyl diphosphate[c0] <=> (1) Diphosphate[c0] + (1) H+[c0] + (1) ent-Kaurene[c0]	4.2.3.19-RXN.c	R_R05092_c	R05092_c
rxn03453_c0	(1) 2-Oxoglutarate[c0] + (1) Gibberellin A53[c0] + (1) Oxygen[c0] => (1) CO2[c0] + (1) Gibberellin A44 diacid[c0] + (1) Succinate[c0]	RXN1F-167.c	R_R05097_c	R05097_c
rxn03458_c0	(1) Sphingosine 1-phosphate[c0] <=> (1) Ethanolamine phosphate[c0] + (1) Hexadecenal[c0]
rxn03473_c0	(1) Codeine[c0] + (1) NADP+[c0] <= (1) Codeinone[c0] + (1) H+[c0] + (1) NADPH[c0]
rxn03474_c0	(1) Codeinone[c0] <=> (1) Neopinone[c0]	RXN-8150.c
rxn03475_c0	(1) 2-Oxoglutarate[c0] + (1) Oxygen[c0] + (1) Thebaine[c0] => (1) CO2[c0] + (1) Formaldehyde[c0] + (1) Neopinone[c0] + (1) Succinate[c0]	RXN-8147.c
rxn03476_c0	(1) 2-Oxoglutarate[c0] + (1) Oxygen[c0] + (1) Thebaine[c0] <=> (1) CO2[c0] + (1) Formaldehyde[c0] + (1) Oripavine[c0] + (1) Succinate[c0]	RXN-8149.c
rxn03500_c0	(1) (R,S)-Norcoclaurine[c0] + (1) S-Adenosyl-L-methionine[c0] <=> (1) (R,S)-Coclaurine[c0] + (1) H+[c0] + (1) S-Adenosyl-L-homocysteine[c0]	2.1.1.128-RXN.c
rxn03501_c0	(1) 1-Carboxyvinyl carboxyphosphonate[c0] + (1) H+[c0] <=> (1) 3-(Hydrohydroxyphosphoryl)pyruvate[c0] + (1) CO2[c0]	2.7.8.23-RXN.c
rxn03501_d0	(1) 1-Carboxyvinyl carboxyphosphonate[d0] + (1) H+[d0] <=> (1) 3-(Hydrohydroxyphosphoryl)pyruvate[d0] + (1) CO2[d0]	2.7.8.23-RXN.c
rxn03519_c0	(1) ADP[c0] + (1) H+[c0] + (1) Phytic acid[c0] <= (1) 1D-myo-Inositol 1,3,4,5,6-pentakisphosphate[c0] + (1) ATP[c0]	RXN-7163.c	R_R05202_c	R05202_c
rxn03547_c0	(1) NAD+[c0] + (1) p-Cumic alcohol[c0] <=> (1) 4-Isopropylbenzaldehyde[c0] + (1) H+[c0] + (1) NADH[c0]	RXN-662.c
rxn03567_c0	(1) NAD+[c0] + (1) cis-2,3-Dihydrodiol 1,1,1-Trichloro-2,2-bis(4'-chlorophenyl)ethane[c0] => (1) 2,3-Dihydroxy 1,1,1-Trichloro-2,2-bis(4'-chlorophenyl)ethane[c0] + (1) H+[c0] + (1) NADH[c0]		R_R05395_c	R05395_c
rxn03567_d0	(1) NAD+[d0] + (1) cis-2,3-Dihydrodiol 1,1,1-Trichloro-2,2-bis(4'-chlorophenyl)ethane[d0] => (1) 2,3-Dihydroxy 1,1,1-Trichloro-2,2-bis(4'-chlorophenyl)ethane[d0] + (1) H+[d0] + (1) NADH[d0]		R_R05395_c	R05395_c
rxn03568_c0	(1) NADP+[c0] + (1) cis-2,3-Dihydrodiol 1,1,1-Trichloro-2,2-bis(4'-chlorophenyl)ethane[c0] <=> (1) 2,3-Dihydroxy 1,1,1-Trichloro-2,2-bis(4'-chlorophenyl)ethane[c0] + (1) H+[c0] + (1) NADPH[c0]		R_R05396_c	R05396_c
rxn03568_d0	(1) NADP+[d0] + (1) cis-2,3-Dihydrodiol 1,1,1-Trichloro-2,2-bis(4'-chlorophenyl)ethane[d0] <=> (1) 2,3-Dihydroxy 1,1,1-Trichloro-2,2-bis(4'-chlorophenyl)ethane[d0] + (1) H+[d0] + (1) NADPH[d0]		R_R05396_c	R05396_c
rxn03594_c0	(1) 4-Methylbenzyl alcohol[c0] + (1) NAD+[c0] <=> (1) H+[c0] + (1) NADH[c0] + (1) p-Tolualdehyde[c0]	RXN-8581.c
rxn03598_c0	(1) Chloroacetaldehyde[c0] + (1) H2O[c0] + (1) NAD+[c0] <=> (1) Chloroacetic acid[c0] + (2) H+[c0] + (1) NADH[c0]
rxn03598_d0	(1) Chloroacetaldehyde[d0] + (1) H2O[d0] + (1) NAD+[d0] <=> (1) Chloroacetic acid[d0] + (2) H+[d0] + (1) NADH[d0]
rxn03598_m0	(1) Chloroacetaldehyde[m0] + (1) H2O[m0] + (1) NAD+[m0] <=> (1) Chloroacetic acid[m0] + (2) H+[m0] + (1) NADH[m0]
rxn03633_c0	(1) 3-O-Methylquercetin[c0] + (1) S-Adenosyl-L-methionine[c0] <=> (1) 3,7-Di-O-methylquercetin[c0] + (1) S-Adenosyl-L-homocysteine[c0]	2.1.1.82-RXN.c
rxn03637_c0	(1) 3-Methylbutanoyl-CoA[c0] + (3) H+[c0] + (3) Malonyl-CoA[c0] => (3) CO2[c0] + (4) CoA[c0] + (1) Phlorisovalerophenone[c0]	2.3.1.156-RXN.c
rxn03637_n0	(1) 3-Methylbutanoyl-CoA[n0] + (3) H+[n0] + (3) Malonyl-CoA[n0] => (3) CO2[n0] + (4) CoA[n0] + (1) Phlorisovalerophenone[n0]	2.3.1.156-RXN.c
rxn03637_r0	(1) 3-Methylbutanoyl-CoA[r0] + (3) H+[r0] + (3) Malonyl-CoA[r0] => (3) CO2[r0] + (4) CoA[r0] + (1) Phlorisovalerophenone[r0]	2.3.1.156-RXN.c
rxn03638_c0	(1) Acetyl-CoA[c0] + (1) alpha-D-Glucosamine 1-phosphate[c0] => (1) CoA[c0] + (1) H+[c0] + (1) N-Acetyl-alpha-D-glucosamine 1-phosphate[c0]
rxn03646_c0	(1) Lycopene[c0] => (1) gamma-Carotene[c0]	RXN1F-150.c	R_R05341_c	R05341_c
rxn03646_r0	(1) Lycopene[r0] <=> (1) gamma-Carotene[r0]	RXN1F-150.c	R_R05341_c	R05341_c
rxn03649_c0	(1) 3-Methylbenzyl alcohol[c0] + (1) NAD+[c0] <=> (1) 3-Methylbenzaldehyde[c0] + (1) H+[c0] + (1) NADH[c0]	RXN-8580.c
rxn03659_c0	(1) Acrylonitrile[c0] + (2) H2O[c0] <=> (1) Acrylic acid[c0] + (1) NH3[c0]	R309-RXN.c
rxn03680_c0	(1) Acrylamide[c0] <=> (1) Acrylonitrile[c0] + (1) H2O[c0]	R310-RXN.c
rxn03680_n0	(1) Acrylamide[n0] <=> (1) Acrylonitrile[n0] + (1) H2O[n0]	R310-RXN.c
rxn03693_c0	(1) Cl-[c0] + (1) trans-2-Chloro-4-carboxymethylenebut-2-en-1,4-olide[c0] <=> (1) 2,5-Dichloro-cis,cis-muconate[c0]	CHLOROMUCISOM-RXN.c
rxn03693_d0	(1) Cl-[d0] + (1) trans-2-Chloro-4-carboxymethylenebut-2-en-1,4-olide[d0] <=> (1) 2,5-Dichloro-cis,cis-muconate[d0]	CHLOROMUCISOM-RXN.c
rxn03693_n0	(1) Cl-[n0] + (1) trans-2-Chloro-4-carboxymethylenebut-2-en-1,4-olide[n0] <=> (1) 2,5-Dichloro-cis,cis-muconate[n0]	CHLOROMUCISOM-RXN.c
rxn03698_c0	(1) 3,6-Dichloro-cis-1,2-dihydroxycyclohexa-3,5-diene[c0] + (1) NAD+[c0] => (1) 3,6-Dichlorocatechol[c0] + (1) H+[c0] + (1) NADH[c0]	CHLOROBENDDH-RXN.c
rxn03698_d0	(1) 3,6-Dichloro-cis-1,2-dihydroxycyclohexa-3,5-diene[d0] + (1) NAD+[d0] => (1) 3,6-Dichlorocatechol[d0] + (1) H+[d0] + (1) NADH[d0]	CHLOROBENDDH-RXN.c
rxn03698_n0	(1) 3,6-Dichloro-cis-1,2-dihydroxycyclohexa-3,5-diene[n0] + (1) NAD+[n0] => (1) 3,6-Dichlorocatechol[n0] + (1) H+[n0] + (1) NADH[n0]	CHLOROBENDDH-RXN.c
rxn03709_c0	(1) 3,6-Dichlorocatechol[c0] + (1) Oxygen[c0] => (1) 2,5-Dichloro-cis,cis-muconate[c0] + (2) H+[c0]	CHLOROCATDIOXY-RXN.c
rxn03709_d0	(1) 3,6-Dichlorocatechol[d0] + (1) Oxygen[d0] => (1) 2,5-Dichloro-cis,cis-muconate[d0] + (2) H+[d0]	CHLOROCATDIOXY-RXN.c
rxn03709_n0	(1) 3,6-Dichlorocatechol[n0] + (1) Oxygen[n0] => (1) 2,5-Dichloro-cis,cis-muconate[n0] + (2) H+[n0]	CHLOROCATDIOXY-RXN.c
rxn03750_c0	(1) 2-Hydroxyphenylacetate[c0] + (1) H+[c0] + (1) NADH[c0] + (1) Oxygen[c0] => (1) H2O[c0] + (1) Homogentisate[c0] + (1) NAD+[c0]
rxn03796_c0	(1) Benzoyl acetyl-CoA[c0] + (1) CoA[c0] <=> (1) Acetyl-CoA[c0] + (1) S-Benzoate coenzyme A[c0]	RXN-2006.c	R_R05506_c	R05506_c
rxn03800_c0	(1) H2O[c0] + (1) Protoanemonin[c0] => (1) H+[c0] + (1) cis-Acetylacrylate[c0]
rxn03801_c0	(1) H2O[c0] + (1) cis-2-Chloro-4-carboxymethylenebut-2-en-1,4-olide[c0] => (1) 2-Chloromaleylacetate[c0] + (1) H+[c0]
rxn03826_c0	(1) 3-(2-Hydroxyphenyl)propanoate[c0] + (1) ATP[c0] + (1) CoA[c0] + (1) FAD[c0] + (2) H2O[c0] + (1) NAD+[c0] => (1) AMP[c0] + (1) Acetyl-CoA[c0] + (1) Diphosphate[c0] + (1) FADH2[c0] + (2) H+[c0] + (1) NADH[c0] + (1) Salicylate[c0]
rxn03839_c0	(1) Acrylic acid[c0] + (1) NH3[c0] <= (1) Acrylamide[c0] + (1) H2O[c0]	R311-RXN.c
rxn03841_c0	(1) 4-Amino-4-deoxychorismate[c0] <=> (1) 4-Aminobenzoate[c0] + (1) H+[c0] + (1) Pyruvate[c0]		R_R05553_c	R05553_c
rxn03842_c0	(1) (S)-Ureidoglycine[c0] + (1) H2O[c0] <=> (1) (-)-Ureidoglycolate[c0] + (1) NH3[c0]	URUR-RXN.c
rxn03843_c0	(1) Isopentenyl diphosphate[c0] + (1) trans,trans-Farnesyl diphosphate[c0] => (1) Diphosphate[c0] + (1) H+[c0] + (1) trans,trans,cis-Geranylgeranyl diphosphate[c0]	RXN0-5180.c	R_R05555_c	R05555_c
rxn03843_d0	(1) Isopentenyl diphosphate[d0] + (1) trans,trans-Farnesyl diphosphate[d0] => (1) Diphosphate[d0] + (1) H+[d0] + (1) trans,trans,cis-Geranylgeranyl diphosphate[d0]	RXN0-5180.c	R_R05555_c	R05555_c
rxn03843_m0	(1) Isopentenyl diphosphate[m0] + (1) trans,trans-Farnesyl diphosphate[m0] => (1) Diphosphate[m0] + (1) H+[m0] + (1) trans,trans,cis-Geranylgeranyl diphosphate[m0]	RXN0-5180.c	R_R05555_c	R05555_c
rxn03843_r0	(1) Isopentenyl diphosphate[r0] + (1) trans,trans-Farnesyl diphosphate[r0] => (1) Diphosphate[r0] + (1) H+[r0] + (1) trans,trans,cis-Geranylgeranyl diphosphate[r0]	RXN0-5180.c	R_R05555_c	R05555_c
rxn03861_c0	(1) 3-Hydroxybutanoyl-CoA[c0] + (1) NADP+[c0] <=> (1) Acetoacetyl-CoA[c0] + (1) H+[c0] + (1) NADPH[c0]	RXN-5901.c
rxn03861_x0	(1) 3-Hydroxybutanoyl-CoA[x0] + (1) NADP+[x0] <=> (1) Acetoacetyl-CoA[x0] + (1) H+[x0] + (1) NADPH[x0]	RXN-5901.c
rxn03870_c0	(1) Benzonitrile[c0] + (2) H2O[c0] => (1) Benzoate[c0] + (1) NH3[c0]		R_R05591_c	R05591_c
rxn03870_n0	(1) Benzonitrile[n0] + (2) H2O[n0] => (1) Benzoate[n0] + (1) NH3[n0]		R_R05591_c	R05591_c
rxn03872_c0	(1) 6-Oxo-2-hydroxycyclohexane-1-carboxyl-CoA[c0] + (1) H2O[c0] => (1) 3-Hydroxypimeloyl-CoA[c0] + (1) H+[c0]		R_R05593_c	R05593_c
rxn03872_d0	(1) 6-Oxo-2-hydroxycyclohexane-1-carboxyl-CoA[d0] + (1) H2O[d0] => (1) 3-Hydroxypimeloyl-CoA[d0] + (1) H+[d0]		R_R05593_c	R05593_c
rxn03874_c0	(1) Crotonoyl-CoA[c0] + (1) H2O[c0] <=> (1) 3-Hydroxybutanoyl-CoA[c0]	3-HYDROXBUTYRYL-COA-DEHYDRATASE-RXN.c|R9-RXN.c	R_R05595_c	R05595_c
rxn03874_v0	(1) Crotonoyl-CoA[v0] + (1) H2O[v0] <=> (1) 3-Hydroxybutanoyl-CoA[v0]	3-HYDROXBUTYRYL-COA-DEHYDRATASE-RXN.c|R9-RXN.c	R_R05595_c	R05595_c
rxn03878_c0	(1) E-Phenylitaconyl-CoA[c0] + (1) H2O[c0] <=> (1) (Hydroxymethylphenyl)succinyl-CoA[c0]	RXN-902.c
rxn03892_c0	(1) Isopentenyl diphosphate[c0] + (1) all-trans-Pentaprenyl diphosphate[c0] <= (1) Diphosphate[c0] + (1) H+[c0] + (1) all-trans-Hexaprenyl diphosphate[c0]
rxn03894_c0	(1) 4-Hydroxybenzoate[c0] + (1) all-trans-Hexaprenyl diphosphate[c0] <=> (1) 3-Hexaprenyl-4-hydroxybenzoate[c0] + (1) Diphosphate[c0] + (1) H+[c0]	RXN-9003.c	R_R05616_c	R05616_c
rxn03894_d0	(1) 4-Hydroxybenzoate[d0] + (1) all-trans-Hexaprenyl diphosphate[d0] => (1) 3-Hexaprenyl-4-hydroxybenzoate[d0] + (1) Diphosphate[d0] + (1) H+[d0]	RXN-9003.c	R_R05616_c	R05616_c
rxn03894_r0	(1) 4-Hydroxybenzoate[r0] + (1) all-trans-Hexaprenyl diphosphate[r0] => (1) 3-Hexaprenyl-4-hydroxybenzoate[r0] + (1) Diphosphate[r0] + (1) H+[r0]	RXN-9003.c	R_R05616_c	R05616_c
rxn03895_c0	(1) Chlorophyll a[c0] + (1) H2O[c0] <=> (1) Chlorophyllide[c0] + (2) H+[c0] + (1) Phytol[c0]	RXN-7738.c	R_R05618_c	R05618_c
rxn03899_c0	(1) NADPH[c0] + (1) Oxygen[c0] + (1) Trimethylamine[c0] <=> (1) H2O[c0] + (1) NADP+[c0] + (1) Trimethylamine N-oxide[c0]
rxn03904_c0	(1) UDP-N-acetylmuramoyl-L-alanyl-D-glutamyl-6-carboxy-L-lysyl-D-alanyl-D-alanine[c0] + (1) di-trans,poly-cis-Undecaprenyl phosphate[c0] <=> (1) UMP[c0] + (1) Undecaprenyl-diphospho-N-acetylmuramoyl-L-alanyl-D-glutamyl-meso-2,6-diaminopimeloyl-D-alanyl-D-alanine[c0]	PHOSNACMURPENTATRANS-RXN.c
rxn03907_c0	(1) 2-C-Methyl-D-erythritol 4-phosphate[c0] + (1) CTP[c0] <=> (1) 4-(Cytidine 5'-diphospho)-2-C-methyl-D-erythritol[c0] + (1) Diphosphate[c0]	2.7.7.60-RXN.c
rxn03908_c0	(1) 4-(Cytidine 5'-diphospho)-2-C-methyl-D-erythritol[c0] + (1) ATP[c0] => (1) 2-Phospho-4-(cytidine 5'-diphospho)-2-C-methyl-D-erythritol[c0] + (1) ADP[c0] + (1) H+[c0]		R_R05634_c	R05634_c
rxn03909_c0	(1) D-Glyceraldehyde 3-phosphate[c0] + (1) H+[c0] + (1) Pyruvate[c0] => (1) 1-Deoxy-D-xylulose 5-phosphate[c0] + (1) CO2[c0]	DXS-RXN.c	R_R05636_c	R05636_c
rxn03910_c0	(1) 2-Phospho-4-(cytidine 5'-diphospho)-2-C-methyl-D-erythritol[c0] <=> (1) 2-C-Methyl-D-erythritol 2,4-cyclodiphosphate[c0] + (1) CMP[c0]	RXN0-302.c		R05637_c
rxn03911_c0	(1) 14-Demethyllanosterol[c0] + (1) NADP+[c0] <=> (1) 4,4-Dimethyl-5alpha-cholesta-8,14,24-trien-3beta-ol[c0] + (1) H+[c0] + (1) NADPH[c0]	1.3.1.70-RXN.c|RXN66-306.c
rxn03912_c0	(2) H+[c0] + (1) Lanosterol[c0] + (3) NADPH[c0] + (3) Oxygen[c0] => (1) 4,4-Dimethyl-5alpha-cholesta-8,14,24-trien-3beta-ol[c0] + (1) Formate[c0] + (4) H2O[c0] + (3) NADP+[c0]	RXN3O-130.c
rxn03924_c0	(1) Pyruvate[c0] + (1) Taurine[c0] <=> (1) L-Alanine[c0] + (1) Sulfoacetaldehyde[c0]	TAURINE-AMINOTRANSFERASE-RXN.c
rxn03933_c0	(1) MurAc(oyl-L-Ala-D-gamma-Glu-L-Lys-D-Ala-D-Ala)-diphospho-undecaprenol[c0] + (1) UDP-N-acetyl-D-glucosamine[c0] <=> (1) UDP[c0] + (1) Undecaprenyl-diphospho-N-acetylmuramoyl-(N-acetylglucosamine)-L-alanyl-gamma-D-glutamyl-L-lysyl-D-alanyl-D-alanine[c0]		R_R05662_c	R05662_c
rxn03955_c0	(1) 3-Methylbutanol[c0] + (1) NAD+[c0] <=> (1) 3-Methylbutanal[c0] + (1) H+[c0] + (1) NADH[c0]	RXN-7693.c
rxn03958_c0	(1) 2-C-Methyl-D-erythritol 4-phosphate[c0] + (1) NADP+[c0] <=> (1) 1-Deoxy-D-xylulose 5-phosphate[c0] + (1) H+[c0] + (1) NADPH[c0]		R_R05688_c	R05688_c
rxn03962_c0	(1) GDP-L-fucose[c0] + (1) NADP+[c0] <=> (1) GDP-4-dehydro-6-deoxy-D-mannose[c0] + (1) H+[c0] + (1) NADPH[c0]		R_R05692_c	R05692_c
rxn03970_c0	(1) Coniferyl aldehyde[c0] + (1) H2O[c0] + (1) NAD+[c0] <=> (1) Ferulate[c0] + (2) H+[c0] + (1) NADH[c0]	RXN-1241.c.araexp.NAD_NADH
rxn03970_m0	(1) Coniferyl aldehyde[m0] + (1) H2O[m0] + (1) NAD+[m0] <=> (1) Ferulate[m0] + (2) H+[m0] + (1) NADH[m0]	RXN-1241.c.araexp.NAD_NADH
rxn03971_c0	(1) Coniferyl aldehyde[c0] + (1) H2O[c0] + (1) NADP+[c0] <=> (1) Ferulate[c0] + (2) H+[c0] + (1) NADPH[c0]	RXN-1241.c.araexp.NADP_NADPH
rxn03971_m0	(1) Coniferyl aldehyde[m0] + (1) H2O[m0] + (1) NADP+[m0] <=> (1) Ferulate[m0] + (2) H+[m0] + (1) NADPH[m0]	RXN-1241.c.araexp.NADP_NADPH
rxn03973_c0	(1) Lathosterol[c0] + (1) NADP+[c0] <= (1) 5alpha-Cholesta-7,24-dien-3beta-ol[c0] + (1) H+[c0] + (1) NADPH[c0]	RXN66-321.c
rxn03973_r0	(1) Lathosterol[r0] + (1) NADP+[r0] <=> (1) 5alpha-Cholesta-7,24-dien-3beta-ol[r0] + (1) H+[r0] + (1) NADPH[r0]	RXN66-321.c
rxn03973_w0	(1) Lathosterol[w0] + (1) NADP+[w0] <= (1) 5alpha-Cholesta-7,24-dien-3beta-ol[w0] + (1) H+[w0] + (1) NADPH[w0]	RXN66-321.c
rxn03976_c0	(1) NADP+[c0] + (1) Reduced riboflavin[c0] <=> (2) H+[c0] + (1) NADPH[c0] + (1) Riboflavin[c0]	NADPH-DEHYDROGENASE-FLAVIN-RXN.c
rxn03983_c0	(1) AMP[c0] + (1) Glutathione disulfide[c0] + (1) H+[c0] + (1) Sulfite[c0] <= (1) Adenylyl sulfate[c0] + (2) Glutathione[c0]	1.8.4.9-RXN.c
rxn03988_c0	(1) 2-Oxoglutarate[c0] + (1) Oxygen[c0] + (1) Phytanoyl-CoA[c0] => (1) 2-Hydroxyphytanoyl-CoA[c0] + (1) CO2[c0] + (1) Succinate[c0]	1.14.11.18-RXN.c
rxn03989_c0	(1) 2-Oxoglutarate[c0] + (1) Leucocyanidin[c0] + (1) Oxygen[c0] => (1) CO2[c0] + (1) H2O[c0] + (1) Succinate[c0] + (1) Taxifolin[c0]		R_R05723_c	R05723_c
rxn03990_c0	(1) NADH[c0] + (2) Nitric oxide[c0] + (2) Oxygen[c0] => (1) H+[c0] + (1) NAD+[c0] + (2) Nitrate[c0]
rxn03993_c0	(1) (Z)-4-Hydroxyphenylacetaldehyde oxime[c0] + (1) H+[c0] + (1) NADPH[c0] + (1) Oxygen[c0] => (1) (S)-4-Hydroxymandelonitrile[c0] + (2) H2O[c0] + (1) NADP+[c0]	1.14.13.68-RXN.c
rxn03996_c0	(2) H+[c0] + (3) NADPH[c0] + (1) Obtusifoliol[c0] + (3) Oxygen[c0] => (1) 4alpha-Methyl-5alpha-ergosta-8,14,24(28)-trien-3beta-ol[c0] + (1) Formate[c0] + (4) H2O[c0] + (3) NADP+[c0]	1.14.13.70-RXN.c
rxn03997_c0	(1) (S)-N-Methylcoclaurine[c0] + (1) H+[c0] + (1) NADPH[c0] + (1) Oxygen[c0] => (1) 3'-Hydroxy-N-methyl-(S)-coclaurine[c0] + (1) H2O[c0] + (1) NADP+[c0]	1.14.13.71-RXN.c
rxn03998_c0	(1) 4beta-Hydroxymethyl-4alpha-methyl-5alpha-cholest-7-en-3beta-ol[c0] + (1) H+[c0] + (1) NADH[c0] + (1) Oxygen[c0] <=> (1) 3beta-Hydroxy-4beta-methyl-5alpha-cholest-7-ene-4alpha-carbaldehyde[c0] + (2) H2O[c0] + (1) NAD+[c0]	RXN-6271.c.araexp.NAD_NADH
rxn04000_c0	(1) ATP[c0] + (1) Acetone[c0] + (1) CO2[c0] + (2) H2O[c0] => (1) AMP[c0] + (1) Acetoacetate[c0] + (4) H+[c0] + (2) Orthophosphate[c0]
rxn04001_c0	(1) 4,4-Dimethyl-5alpha-cholest-7-en-3beta-ol[c0] + (1) H+[c0] + (1) NADPH[c0] + (1) Oxygen[c0] => (1) 4beta-Hydroxymethyl-4alpha-methyl-5alpha-cholest-7-en-3beta-ol[c0] + (1) H2O[c0] + (1) NADP+[c0]	1.14.13.72-RXN.c.araexp.NADP_NADPH
rxn04002_c0	(1) 4beta-Hydroxymethyl-4alpha-methyl-5alpha-cholest-7-en-3beta-ol[c0] + (1) H+[c0] + (1) NADPH[c0] + (1) Oxygen[c0] => (1) 3beta-Hydroxy-4beta-methyl-5alpha-cholest-7-ene-4alpha-carbaldehyde[c0] + (2) H2O[c0] + (1) NADP+[c0]	RXN-6271.c.araexp.NADP_NADPH
rxn04003_c0	(1) 3beta-Hydroxy-4beta-methyl-5alpha-cholest-7-ene-4alpha-carbaldehyde[c0] + (1) NADPH[c0] + (1) Oxygen[c0] => (1) 3beta-Hydroxy-4beta-methyl-5alpha-cholest-7-ene-4alpha-carboxylate[c0] + (1) H2O[c0] + (1) NADP+[c0]	RXN-6269.c.araexp.NADP_NADPH
rxn04012_c0	(1) (-)-Jasmonic acid[c0] + (1) S-Adenosyl-L-methionine[c0] <=> (1) Methyl jasmonate[c0] + (1) S-Adenosyl-L-homocysteine[c0]	RXN1F-28.c		R05759_c
rxn04018_c0	(1) Geranyl diphosphate[c0] <=> (1) (-)-alpha-Pinene[c0] + (1) Diphosphate[c0] + (1) H+[c0]	RXN-5106.c	R_R05765_c	R05765_c
rxn04019_c0	(1) Geranyl diphosphate[c0] <=> (1) (-)-beta-Pinene[c0] + (1) Diphosphate[c0] + (1) H+[c0]	RXN-5107.c	R_R05766_c	R05766_c
rxn04022_c0	(1) Hydroquinone[c0] + (1) UDP-glucose[c0] <=> (1) Arbutin[c0] + (1) UDP[c0]	2.4.1.218-RXN.c.araexp.CPD-12575		R05769_c
rxn04026_c0	(1) 3-Sulfopyruvate[c0] + (1) H+[c0] => (1) CO2[c0] + (1) Sulfoacetaldehyde[c0]
rxn04027_c0	(1) Sulfite[c0] + (1) UDP-glucose[c0] => (1) H2O[c0] + (1) UDP-6-sulfoquinovose[c0]		R_R05775_c	R05775_c
rxn04028_c0	(1) 24-Methylenelophenol[c0] + (1) S-Adenosyl-L-methionine[c0] => (1) 24-Ethylidenelophenol[c0] + (1) H+[c0] + (1) S-Adenosyl-L-homocysteine[c0]
rxn04039_c0	(1) ATP[c0] + (1) H+[c0] + (1) Phytic acid[c0] <=> (1) 1-Diphosinositol pentakisphosphate[c0] + (1) ADP[c0]	RXN-10972.c
rxn04040_c0	(1) ATP[c0] + (1) D-myo-Inositol 1,4,5-trisphosphate[c0] => (1) 1D-myo-Inositol 1,4,5,6-tetrakisphosphate[c0] + (1) ADP[c0] + (1) H+[c0]	2.7.1.151-RXN.c
rxn04041_c0	(1) 1D-myo-Inositol 1,4,5,6-tetrakisphosphate[c0] + (1) ATP[c0] => (1) 1D-myo-Inositol 1,3,4,5,6-pentakisphosphate[c0] + (1) ADP[c0] + (1) H+[c0]	RXN-7162.c
rxn04058_c0	(1) H2O[c0] + (1) Polyneuridine aldehyde[c0] <=> (1) 16-Epivellosimine[c0] + (1) CO2[c0] + (1) Methanol[c0]	3.1.1.78-RXN.c	R_R05825_c	R05825_c
rxn04059_c0	(1) 16-Epivellosimine[c0] <=> (1) Vellosimine[c0]	RXN-8225.c
rxn04066_c0	(1) H+[c0] + (1) Loganate[c0] + (1) NADPH[c0] + (1) Oxygen[c0] => (2) H2O[c0] + (1) NADP+[c0] + (1) Secologanate[c0]	RXN-4522.c
rxn04086_c0	(1) H+[c0] + (1) NADPH[c0] + (1) Oxygen[c0] + (1) Tabersonine[c0] => (1) 16-Hydroxytabersonine[c0] + (1) H2O[c0] + (1) NADP+[c0]	1.14.13.73-RXN.c
rxn04088_c0	(1) 2-Oxoglutarate[c0] + (1) Desacetoxyvindoline[c0] + (1) Oxygen[c0] => (1) CO2[c0] + (1) Deacetylvindoline[c0] + (1) Succinate[c0]	1.14.11.20-RXN.c
rxn04106_c0	(1) 16-Epivellosimine[c0] + (1) Acetyl-CoA[c0] <=> (1) CoA[c0] + (1) Vinorine[c0]	2.3.1.160-RXN.c
rxn04113_c0	(1) 1-Hydroxy-2-methyl-2-butenyl 4-diphosphate[c0] + (1) H+[c0] + (1) NADPH[c0] => (1) H2O[c0] + (1) Isopentenyl diphosphate[c0] + (1) NADP+[c0]		R_R05884_c	R05884_c
rxn04136_c0	(1) Geranyl diphosphate[c0] => (1) Diphosphate[c0] + (1) H+[c0] + (1) d-Limonene[c0]	4.2.3.20-RXN.c
rxn04140_c0	(1) H2O[c0] + (1) Methylamine[c0] + (1) Oxygen[c0] => (1) Formaldehyde[c0] + (1) Hydrogen peroxide[c0] + (1) NH3[c0]
rxn04140_x0	(1) H2O[x0] + (1) Methylamine[x0] + (1) Oxygen[x0] => (1) Formaldehyde[x0] + (1) Hydrogen peroxide[x0] + (1) NH3[x0]
rxn04142_c0	(1) L-Allothreonine[c0] <=> (1) Acetaldehyde[c0] + (1) Glycine[c0]	LTAA-RXN.c
rxn04143_c0	(1) (R,R)-Tartaric acid[c0] + (1) NAD+[c0] <=> (1) 2-Hydroxy-3-oxosuccinate[c0] + (1) H+[c0] + (1) NADH[c0]	TARTRATE-DEHYDROGENASE-RXN.c
rxn04147_c0	(1) NADPH[c0] + (2) trans,trans-Farnesyl diphosphate[c0] => (2) Diphosphate[c0] + (1) H+[c0] + (1) NADP+[c0] + (1) Squalene[c0]	RXN-13162.c.araexp.NADP_NADPH|YEAST-SQUALENE-RXN.c	R_R06223_c	R06223_c
rxn04153_c0	(1) 13(1)-Hydroxy-magnesium-protoporphyrin IX 13-monomethyl ester[c0] + (1) H+[c0] + (1) NADPH[c0] + (1) Oxygen[c0] => (1) 13(1)-Oxo-magnesium-protoporphyrin IX 13-monomethyl ester[c0] + (2) H2O[c0] + (1) NADP+[c0]		R_R06266_c	R06266_c
rxn04154_c0	(1) 13(1)-Oxo-magnesium-protoporphyrin IX 13-monomethyl ester[c0] + (1) NADPH[c0] + (1) Oxygen[c0] <=> (1) Divinylprotochlorophyllide[c0] + (2) H2O[c0] + (1) NADP+[c0]		R_R06267_c	R06267_c
rxn04159_c0	(1) Divinyl chlorophyllide a[c0] + (1) H+[c0] + (1) NADPH[c0] => (1) Chlorophyllide[c0] + (1) NADP+[c0]	RXN-5286.c
rxn04161_c0	(1) Chlorophyllide[c0] + (1) H+[c0] + (1) Phytyl diphosphate[c0] <=> (1) Chlorophyll a[c0] + (1) Diphosphate[c0]	RXN1F-66.c	R_R06284_c	R06284_c
rxn04162_c0	(1) Divinyl chlorophyllide a[c0] + (1) NADP+[c0] <=> (1) Divinylprotochlorophyllide[c0] + (1) H+[c0] + (1) NADPH[c0]	RXN-5285.c	R_R06286_c	R06286_c
rxn04165_c0	(1) H+[c0] + (1) NADPH[c0] + (1) Oxygen[c0] + (1) ent-Kaurene[c0] => (1) H2O[c0] + (1) Kaur-16-en-18-ol[c0] + (1) NADP+[c0]	1.14.13.78-RXN.c	R_R06291_c	R06291_c
rxn04166_c0	(1) H+[c0] + (1) Kaur-16-en-18-ol[c0] + (1) NADPH[c0] + (1) Oxygen[c0] => (2) H2O[c0] + (1) Kaur-16-en-18-al[c0] + (1) NADP+[c0]	RXN-5242.c	R_R06292_c	R06292_c
rxn04167_c0	(1) Kaur-16-en-18-al[c0] + (1) NADPH[c0] + (1) Oxygen[c0] => (1) H2O[c0] + (1) Kaur-16-en-18-oic acid[c0] + (1) NADP+[c0]	RXN-7580.c	R_R06293_c	R06293_c
rxn04168_c0	(1) H+[c0] + (1) Kaur-16-en-18-oic acid[c0] + (1) NADPH[c0] + (1) Oxygen[c0] => (1) H2O[c0] + (1) NADP+[c0] + (1) ent-7alpha-Hydroxykaur-16-en-19-oic acid[c0]	1.14.13.79-RXN.c	R_R06294_c	R06294_c
rxn04168_r0	(1) H+[r0] + (1) Kaur-16-en-18-oic acid[r0] + (1) NADPH[r0] + (1) Oxygen[r0] => (1) H2O[r0] + (1) NADP+[r0] + (1) ent-7alpha-Hydroxykaur-16-en-19-oic acid[r0]	1.14.13.79-RXN.c	R_R06294_c	R06294_c
rxn04169_c0	(1) H+[c0] + (1) NADPH[c0] + (1) Oxygen[c0] + (1) ent-7alpha-Hydroxykaur-16-en-19-oic acid[c0] => (1) Gibberellin A12 aldehyde[c0] + (2) H2O[c0] + (1) NADP+[c0]	RXN1F-160.c	R_R06295_c	R06295_c
rxn04169_r0	(1) H+[r0] + (1) NADPH[r0] + (1) Oxygen[r0] + (1) ent-7alpha-Hydroxykaur-16-en-19-oic acid[r0] => (1) Gibberellin A12 aldehyde[r0] + (2) H2O[r0] + (1) NADP+[r0]	RXN1F-160.c	R_R06295_c	R06295_c
rxn04170_c0	(1) H+[c0] + (1) NADPH[c0] + (1) Oxygen[c0] + (1) ent-7alpha-Hydroxykaur-16-en-19-oic acid[c0] => (1) 6beta,7beta-Dihydroxykaurenoic acid[c0] + (1) H2O[c0] + (1) NADP+[c0]		R_R06296_c	R06296_c
rxn04170_r0	(1) H+[r0] + (1) NADPH[r0] + (1) Oxygen[r0] + (1) ent-7alpha-Hydroxykaur-16-en-19-oic acid[r0] => (1) 6beta,7beta-Dihydroxykaurenoic acid[r0] + (1) H2O[r0] + (1) NADP+[r0]		R_R06296_c	R06296_c
rxn04171_c0	(1) Gibberellin A12 aldehyde[c0] + (1) NADPH[c0] + (1) Oxygen[c0] => (1) Gibberellin A12[c0] + (1) H2O[c0] + (1) NADP+[c0]	RXN1F-161.c	R_R06297_c	R06297_c
rxn04171_r0	(1) Gibberellin A12 aldehyde[r0] + (1) NADPH[r0] + (1) Oxygen[r0] => (1) Gibberellin A12[r0] + (1) H2O[r0] + (1) NADP+[r0]	RXN1F-161.c	R_R06297_c	R06297_c
rxn04180_c0	(1) Acetyl-CoA[c0] + (1) Taxa-4(20),11(12)-dien-5alpha-ol[c0] => (1) CoA[c0] + (1) Taxa-4(20),11(12)-dien-5alpha-yl acetate[c0]	2.3.1.162-RXN.c
rxn04181_c0	(1) H+[c0] + (1) NADPH[c0] + (1) Oxygen[c0] + (1) Taxa-4(20),11(12)-dien-5alpha-ol[c0] => (1) H2O[c0] + (1) NADP+[c0] + (1) Taxa-4(20),11(12)-dien-5alpha,13alpha-diol[c0]	1.14.13.77-RXN.c
rxn04184_c0	(1) 10-Deacetylbaccatin III[c0] + (1) Acetyl-CoA[c0] => (1) Baccatin III[c0] + (1) CoA[c0]	2.3.1.167-RXN.c
rxn04195_c0	(1) 2-Oxoglutarate[c0] + (1) Gibberellin A12[c0] + (1) Oxygen[c0] => (1) CO2[c0] + (1) Gibberellin A15 open lactone[c0] + (1) Succinate[c0]		R_R06322_c	R06322_c
rxn04196_c0	(1) 2-Oxoglutarate[c0] + (1) Gibberellin A15 open lactone[c0] + (1) Oxygen[c0] => (1) CO2[c0] + (1) Gibberellin A24[c0] + (1) H2O[c0] + (1) Succinate[c0]		R_R06323_c	R06323_c
rxn04208_c0	(1) 2-Oxoglutarate[c0] + (1) Gibberellin A24[c0] + (1) Oxygen[c0] => (1) CO2[c0] + (1) Gibberellin A36[c0] + (1) Succinate[c0]	RXN-6523.c
rxn04209_c0	(1) 2-Oxoglutarate[c0] + (1) Gibberellin A9[c0] + (1) Oxygen[c0] => (1) CO2[c0] + (1) Gibberellin A4[c0] + (1) Succinate[c0]	RXN1F-165.c	R_R06336_c	R06336_c
rxn04210_c0	(1) 2-Oxoglutarate[c0] + (1) Gibberellin A9[c0] + (1) Oxygen[c0] => (1) CO2[c0] + (1) Gibberellin A51[c0] + (1) Succinate[c0]	RXN-171.c	R_R06337_c	R06337_c
rxn04211_c0	(1) 2-Oxoglutarate[c0] + (1) Gibberellin A4[c0] + (1) Oxygen[c0] => (1) CO2[c0] + (1) Gibberellin A34[c0] + (1) Succinate[c0]	RXN-6550.c	R_R06338_c	R06338_c
rxn04227_c0	(1) Abietinol[c0] + (1) H+[c0] + (1) NADPH[c0] + (1) Oxygen[c0] <=> (1) Abietal[c0] + (2) H2O[c0] + (1) NADP+[c0]	RXN-12799.c
rxn04227_r0	(1) Abietinol[r0] + (1) H+[r0] + (1) NADPH[r0] + (1) Oxygen[r0] => (1) Abietal[r0] + (2) H2O[r0] + (1) NADP+[r0]	RXN-12799.c
rxn04230_c0	(1) Abietal[c0] + (1) H2O[c0] + (1) NAD+[c0] <= (1) Abietate[c0] + (2) H+[c0] + (1) NADH[c0]
rxn04234_c0	(1) H2O[c0] + (1) NAD+[c0] + (1) Perillyl aldehyde[c0] <=> (2) H+[c0] + (1) NADH[c0] + (1) Perillic acid[c0]		R_R06366_c	R06366_c
rxn04234_d0	(1) H2O[d0] + (1) NAD+[d0] + (1) Perillyl aldehyde[d0] <=> (2) H+[d0] + (1) NADH[d0] + (1) Perillic acid[d0]		R_R06366_c	R06366_c
rxn04234_m0	(1) H2O[m0] + (1) NAD+[m0] + (1) Perillyl aldehyde[m0] <=> (2) H+[m0] + (1) NADH[m0] + (1) Perillic acid[m0]		R_R06366_c	R06366_c
rxn04276_c0	(1) 3-Hydroxy-2,6-dimethyl-5-methylene-heptanoyl-CoA[c0] + (1) NAD+[c0] <=> (1) 2,6-Dimethyl-5-methylene-3-oxo-heptanoyl-CoA[c0] + (1) H+[c0] + (1) NADH[c0]		R_R06413_c	R06413_c
rxn04276_x0	(1) 3-Hydroxy-2,6-dimethyl-5-methylene-heptanoyl-CoA[x0] + (1) NAD+[x0] <=> (1) 2,6-Dimethyl-5-methylene-3-oxo-heptanoyl-CoA[x0] + (1) H+[x0] + (1) NADH[x0]		R_R06413_c	R06413_c
rxn04278_c0	(1) 3-Isopropylbut-3-enoyl-CoA[c0] + (1) H2O[c0] => (1) 3-Isopropyl-3-butenoic acid[c0] + (1) CoA[c0] + (1) H+[c0]		R_R06415_c	R06415_c
rxn04278_d0	(1) 3-Isopropylbut-3-enoyl-CoA[d0] + (1) H2O[d0] => (1) 3-Isopropyl-3-butenoic acid[d0] + (1) CoA[d0] + (1) H+[d0]		R_R06415_c	R06415_c
rxn04284_c0	(1) (-)-alpha-Terpineol[c0] <=> (1) 1,8-Cineole[c0]	RXN-5102.c		R06422_c
rxn04308_c0	(8) Isopentenyl diphosphate[c0] + (1) trans,trans-Farnesyl diphosphate[c0] => (8) Diphosphate[c0] + (8) H+[c0] + (1) di-trans,poly-cis-Undecaprenyl diphosphate[c0]	RXN-8999.c
rxn04327_c0	(1) (S)-2,3-Epoxysqualene[c0] => (1) Lupeol[c0]	RXN-111.c
rxn04330_c0	(1) (S)-2,3-Epoxysqualene[c0] => (1) beta-Amyrin[c0]	RXN-7570.c
rxn04332_c0	(1) (S)-2,3-Epoxysqualene[c0] => (1) alpha-Amyrin[c0]	RXN-8434.c
rxn04375_c0	(1) Dihydroceramide[c0] + (1) H+[c0] + (1) H2O[c0] => (1) Fatty acid[c0] + (1) Sphinganine[c0]		R_R06518_c	R06518_c
rxn04378_c0	(1) Ceramide 1-phosphate[c0] + (1) H2O[c0] => (2) H+[c0] + (1) N-Acylsphingosine[c0] + (1) Orthophosphate[c0]
rxn04381_c0	(1) H+[c0] + (1) NADPH[c0] + (1) Oxygen[c0] + (1) Sphinganine[c0] => (1) H2O[c0] + (1) NADP+[c0] + (1) Phytosphingosine[c0]	RXN3O-1380.c
rxn04382_c0	(1) Dihydroceramide[c0] + (1) H+[c0] + (1) NADPH[c0] + (1) Oxygen[c0] <=> (1) H2O[c0] + (1) NADP+[c0] + (1) Phytoceramide[c0]
rxn04383_c0	(1) H+[c0] + (1) H2O[c0] + (1) Phytoceramide[c0] <= (1) Fatty acid[c0] + (1) Phytosphingosine[c0]
rxn04387_c0	(1) H+[c0] + (1) Leucocyanidin[c0] + (1) NADPH[c0] => (1) (+)-Catechin[c0] + (1) H2O[c0] + (1) NADP+[c0]	RXN-1484.c
rxn04388_c0	(1) H+[c0] + (1) Leucodelphinidin[c0] + (1) NADPH[c0] => (1) (+)-Gallocatechin[c0] + (1) H2O[c0] + (1) NADP+[c0]	RXN-9720.c
rxn04389_c0	(1) H+[c0] + (1) Pelargonidin[c0] + (1) UDP-glucose[c0] <=> (1) Pelargonidin 3-O-glucoside[c0] + (1) UDP[c0]	PELUDP-RXN.c.araexp.CPD-12575	R_R06534_c	R06534_c
rxn04390_c0	(1) Cyanidin[c0] + (1) H+[c0] + (1) UDP-glucose[c0] <=> (1) Chrysanthemin[c0] + (1) UDP[c0]	RXN1F-775.c.araexp.CPD-12575	R_R06535_c	R06535_c
rxn04391_c0	(1) Delphinidin[c0] + (1) H+[c0] + (1) UDP-glucose[c0] <=> (1) Delphinidin 3-O-glucoside[c0] + (1) UDP[c0]	RXN-7815.c.araexp.CPD-12575	R_R06536_c	R06536_c
rxn04392_c0	(1) Apigenin[c0] + (1) H+[c0] + (1) NADPH[c0] + (1) Oxygen[c0] => (1) H2O[c0] + (1) Luteolin[c0] + (1) NADP+[c0]	RXN-7651.c	R_R06537_c	R06537_c
rxn04393_c0	(1) H+[c0] + (1) Kaempferol[c0] + (1) NADPH[c0] + (1) Oxygen[c0] => (1) H2O[c0] + (1) NADP+[c0] + (1) Quercetin[c0]	RXN-12510.c|RXN-12510.c.araexp.CPD-520	R_R06538_c	R06538_c
rxn04394_c0	(1) 2-Oxoglutarate[c0] + (1) Dihydromyricetin[c0] + (1) Oxygen[c0] => (1) CO2[c0] + (1) H+[c0] + (1) H2O[c0] + (1) Myricetin[c0] + (1) Succinate[c0]	RXN-8450.c	R_R06539_c	R06539_c
rxn04395_c0	(1) 2-Oxoglutarate[c0] + (1) Oxygen[c0] + (1) cis-3,4-Leucopelargonidin[c0] => (1) CO2[c0] + (1) Dihydrokaempferol[c0] + (1) H2O[c0] + (1) Succinate[c0]		R_R06540_c	R06540_c
rxn04407_c0	(1) Naringenin[c0] <= (1) Daidzein[c0] + (1) H2O[c0]
rxn04411_c0	(1) Isoliquiritigenin[c0] => (1) Liquiritigenin[c0]	CHALCONE-ISOMERASE-RXN.c.araexp.CPD-3041_CPD-3061|RXN-3221.c	R_R06556_c	R06556_c
rxn04411_n0	(1) Isoliquiritigenin[n0] => (1) Liquiritigenin[n0]	CHALCONE-ISOMERASE-RXN.c.araexp.CPD-3041_CPD-3061|RXN-3221.c	R_R06556_c	R06556_c
rxn04411_r0	(1) Isoliquiritigenin[r0] => (1) Liquiritigenin[r0]	CHALCONE-ISOMERASE-RXN.c.araexp.CPD-3041_CPD-3061|RXN-3221.c	R_R06556_c	R06556_c
rxn04415_c0	(1) Formononetin[c0] + (1) H+[c0] + (1) NADPH[c0] + (1) Oxygen[c0] => (1) 2'-Hydroxyformononetin[c0] + (1) H2O[c0] + (1) NADP+[c0]	ISOFLAVONE-2-HYDROXYLASE-RXN.c
rxn04417_c0	(1) 2'-Hydroxyformononetin[c0] + (2) H+[c0] + (1) NADPH[c0] <=> (1) (-)-Vestitone[c0] + (1) NADP+[c0]	RXN-3562.c
rxn04419_c0	(1) Daidzein[c0] + (1) S-Adenosyl-L-methionine[c0] <= (1) Formononetin[c0] + (1) H+[c0] + (1) S-Adenosyl-L-homocysteine[c0]
rxn04423_c0	(1) 5-Hydroxyferuloyl-CoA[c0] + (1) H+[c0] + (1) NADPH[c0] <=> (1) 5-Hydroxyconiferaldehyde[c0] + (1) CoA[c0] + (1) NADP+[c0]			R06569_c
rxn04424_c0	(1) 5-Hydroxyconiferaldehyde[c0] + (1) H+[c0] + (1) NADPH[c0] <=> (1) 5-Hydroxyconiferyl alcohol[c0] + (1) NADP+[c0]
rxn04424_w0	(1) 5-Hydroxyconiferaldehyde[w0] + (1) H+[w0] + (1) NADPH[w0] <=> (1) 5-Hydroxyconiferyl alcohol[w0] + (1) NADP+[w0]
rxn04425_c0	(1) Caffeic aldehyde[c0] + (1) H+[c0] + (1) NADPH[c0] <=> (1) Caffeyl alcohol[c0] + (1) NADP+[c0]
rxn04425_w0	(1) Caffeic aldehyde[w0] + (1) H+[w0] + (1) NADPH[w0] <=> (1) Caffeyl alcohol[w0] + (1) NADP+[w0]
rxn04426_c0	(1) Coniferyl aldehyde[c0] + (1) H+[c0] + (1) NADPH[c0] + (1) Oxygen[c0] <=> (1) 5-Hydroxyconiferaldehyde[c0] + (1) H2O[c0] + (1) NADP+[c0]	RXN-1142.c
rxn04427_c0	(1) Coniferyl alcohol[c0] + (1) H+[c0] + (1) NADPH[c0] + (1) Oxygen[c0] => (1) 5-Hydroxyconiferyl alcohol[c0] + (1) H2O[c0] + (1) NADP+[c0]	RXN-1144.c
rxn04429_c0	(1) Caffeyl alcohol[c0] + (1) S-Adenosyl-L-methionine[c0] => (1) Coniferyl alcohol[c0] + (1) H+[c0] + (1) S-Adenosyl-L-homocysteine[c0]
rxn04430_c0	(1) 5-Hydroxyconiferaldehyde[c0] + (1) S-Adenosyl-L-methionine[c0] <=> (1) H+[c0] + (1) S-Adenosyl-L-homocysteine[c0] + (1) Sinapoyl aldehyde[c0]	RXN-1143.c
rxn04431_c0	(1) 5-Hydroxyconiferyl alcohol[c0] + (1) S-Adenosyl-L-methionine[c0] => (1) H+[c0] + (1) S-Adenosyl-L-homocysteine[c0] + (1) Sinapyl alcohol[c0]
rxn04432_c0	(1) 5-Hydroxyferuloyl-CoA[c0] + (1) S-Adenosyl-L-methionine[c0] <=> (1) H+[c0] + (1) S-Adenosyl-L-homocysteine[c0] + (1) Sinapoyl-CoA[c0]
rxn04437_c0	(1) 5-Hydroxyferulic acid methyl ester[c0] + (1) ATP[c0] + (1) CoA[c0] => (1) 5-Hydroxyferuloyl-CoA[c0] + (1) AMP[c0] + (1) Diphosphate[c0] + (1) H+[c0]	RXN-1122.c
rxn04443_c0	(1) Aminofructose 6-phosphate[c0] + (1) D-Ribose 5-phosphate[c0] <=> (1) Iminoerythrose 4-phosphate[c0] + (1) Sedoheptulose 7-phosphate[c0]	RXN-9583.c
rxn04453_c0	(1) 5-Hydroxyisourate[c0] + (1) H2O[c0] => (1) 5-Hydroxy-2-oxo-4-ureido-2,5-dihydro-1H-imidazole-5-carboxylate[c0] + (1) H+[c0]		R_R06601_c	R06601_c
rxn04454_c0	(1) Isochorismate[c0] <=> (1) Pyruvate[c0] + (1) Salicylate[c0]	RXN-1981.c
rxn04456_c0	(1) 5-Hydroxy-2-oxo-4-ureido-2,5-dihydro-1H-imidazole-5-carboxylate[c0] => (1) (S)(+)-Allantoin[c0] + (1) CO2[c0]
rxn04458_c0	(1) Daidzein[c0] + (1) H+[c0] + (1) NADPH[c0] + (1) Oxygen[c0] => (1) 2'-Hydroxydaidzein[c0] + (1) H2O[c0] + (1) NADP+[c0]	RXN-4501.c
rxn04458_r0	(1) Daidzein[r0] + (1) H+[r0] + (1) NADPH[r0] + (1) Oxygen[r0] => (1) 2'-Hydroxydaidzein[r0] + (1) H2O[r0] + (1) NADP+[r0]	RXN-4501.c
rxn04459_c0	(1) Genistein[c0] + (1) H+[c0] + (1) NADPH[c0] + (1) Oxygen[c0] => (1) 2'-Hydroxygenistein[c0] + (1) H2O[c0] + (1) NADP+[c0]	RXN-7141.c
rxn04459_r0	(1) Genistein[r0] + (1) H+[r0] + (1) NADPH[r0] + (1) Oxygen[r0] => (1) 2'-Hydroxygenistein[r0] + (1) H2O[r0] + (1) NADP+[r0]	RXN-7141.c
rxn04462_c0	(1) H+[c0] + (1) NADPH[c0] + (1) Naringenin[c0] <=> (1) Apiforol[c0] + (1) NADP+[c0]		R_R06610_c	R06610_c
rxn04463_c0	(1) Kaempferol[c0] + (1) UDP-glucose[c0] <=> (1) Kaempferol 3-O-glucoside[c0] + (1) UDP[c0]	RXN1F-461.c.araexp.CPD-12575	R_R06611_c	R06611_c
rxn04466_c0	(1) H+[c0] + (1) NADPH[c0] + (1) cis-3,4-Leucopelargonidin[c0] => (1) Afzelechin[c0] + (1) H2O[c0] + (1) NADP+[c0]	RXN-1481.c
rxn04468_c0	(1) Gibberellin A4[c0] => (1) Gibberellin A7[c0] + (2) H+[c0]
rxn04565_c0	(1) H+[c0] + (1) NADPH[c0] + (1) Tropinone[c0] <=> (1) NADP+[c0] + (1) Pseudotropine[c0]	TROPINONE-REDUCTASE-RXN.c
rxn04571_c0	(1) Cadaverine[c0] + (1) H2O[c0] + (1) Oxygen[c0] => (1) 5-Aminopentanal[c0] + (1) Hydrogen peroxide[c0] + (1) NH3[c0]	RXN-11784.c	R_R06740_c	R06740_c
rxn04571_d0	(1) Cadaverine[d0] + (1) H2O[d0] + (1) Oxygen[d0] => (1) 5-Aminopentanal[d0] + (1) Hydrogen peroxide[d0] + (1) NH3[d0]	RXN-11784.c	R_R06740_c	R06740_c
rxn04571_x0	(1) Cadaverine[x0] + (1) H2O[x0] + (1) Oxygen[x0] => (1) 5-Aminopentanal[x0] + (1) Hydrogen peroxide[x0] + (1) NH3[x0]	RXN-11784.c	R_R06740_c	R06740_c
rxn04608_c0	(1) 2-Hydroxy-2,3-dihydrogenistein[c0] => (1) Genistein[c0] + (1) H+[c0] + (1) H2O[c0]	RXN-3303.c
rxn04609_c0	(1) Genistein[c0] + (1) S-Adenosyl-L-methionine[c0] <=> (1) Prunetin[c0] + (1) S-Adenosyl-L-homocysteine[c0]	RXN-3642.c
rxn04610_c0	(1) Biochanin A[c0] + (1) H+[c0] + (1) UDP-glucose[c0] <=> (1) Biochanin A-beta-D-glucoside[c0] + (1) UDP[c0]	RXN-4702.c.araexp.CPD-12575
rxn04614_c0	(1) Malonyl-CoA[c0] + (1) Pelargonidin 3-O-(6-caffeoyl-beta-D-glucoside) 5-O-beta-D-glucoside[c0] => (1) 4'''-Demalonylsalvianin[c0] + (1) CoA[c0]	2.3.1.172-RXN.c
rxn04615_c0	(1) 4'''-Demalonylsalvianin[c0] + (1) Malonyl-CoA[c0] => (1) CoA[c0] + (1) Salvianin[c0]	RXN-8139.c
rxn04616_c0	(1) Malonyl-CoA[c0] + (1) Pelargonidin 3-O-glucoside[c0] => (1) CoA[c0] + (1) Pelargonidin 3-O-(6-O-malonyl-beta-D-glucoside)[c0]	RXN-7834.c
rxn04617_c0	(1) Pelargonidin 3-O-glucoside[c0] + (1) UDP-L-rhamnose[c0] <=> (1) Pelargonidin 3-O-rutinoside[c0] + (1) UDP[c0]	RXN-7830.c
rxn04618_c0	(1) Pelargonidin 3-O-rutinoside[c0] + (1) UDP-glucose[c0] <=> (1) Pelargonidin 3-O-rutinoside 5-O-beta-D-glucoside[c0] + (1) UDP[c0]	RXN-7832.c.araexp.CPD-12575
rxn04624_c0	(1) 3'-Phosphoadenylyl sulfate[c0] + (1) Quercetin 3,4'-bissulfate[c0] => (1) Adenosine 3',5'-bisphosphate[c0] + (1) Quercetin 3,4',7-trissulfate[c0]	RXN-10130.c
rxn04625_c0	(1) H+[c0] + (1) Quercetin[c0] + (1) UDP-glucose[c0] <=> (1) Quercimeritrin[c0] + (1) UDP[c0]	RXN-8264.c.araexp.CPD-12575_CPD-520
rxn04630_c0	(1) Myricetin[c0] + (1) S-Adenosyl-L-methionine[c0] <=> (1) H+[c0] + (1) Laricitrin[c0] + (1) S-Adenosyl-L-homocysteine[c0]	RXN-8451.c
rxn04630_n0	(1) Myricetin[n0] + (1) S-Adenosyl-L-methionine[n0] <=> (1) H+[n0] + (1) Laricitrin[n0] + (1) S-Adenosyl-L-homocysteine[n0]	RXN-8451.c
rxn04636_c0	(1) Apigenin 7-O-beta-D-glucoside[c0] + (1) Malonyl-CoA[c0] => (1) Apigenin 7-(6''-malonylglucoside)[c0] + (1) CoA[c0]	RXN-9700.c
rxn04641_c0	(1) Apigenin 7-O-beta-D-glucoside[c0] + (1) UDP-L-rhamnose[c0] <=> (1) Apigenin 7-O-neohesperidoside[c0] + (1) UDP[c0]	RXN-9699.c
rxn04642_c0	(1) Luteolin 7-O-glucuronide[c0] + (1) UDP-glucuronate[c0] <=> (1) Luteolin 7-O-[beta-D-glucuronosyl-(1->2)-beta-D-glucuronide][c0] + (1) UDP[c0]	2.4.1.190-RXN.c
rxn04643_c0	(1) Luteolin 7-O-[beta-D-glucuronosyl-(1->2)-beta-D-glucuronide][c0] + (1) UDP-glucuronate[c0] <=> (1) Luteolin 7-O-[beta-D-glucuronosyl-(1->2)-beta-D-glucuronide]-4'-O-beta-D-glucuronide[c0] + (1) UDP[c0]	2.4.1.191-RXN.c
rxn04644_c0	(1) Luteolin 7-O-beta-D-glucoside[c0] + (1) UDP-L-rhamnose[c0] <=> (1) Scolymoside[c0] + (1) UDP[c0]	RXN-5004.c
rxn04650_c0	(1) 2,5-Dichloro-carboxymethylenebut-2-en-4-olide[c0] + (1) H2O[c0] => (1) 2,5-Dichloro-4-oxohex-2-enedioate[c0] + (1) H+[c0]
rxn04653_c0	(1) H2O[c0] + (1) trans-4-Carboxymethylenebut-2-en-4-olide[c0] => (1) 2-Maleylacetate[c0] + (1) H+[c0]
rxn04658_c0	(1) H+[c0] + (1) N2-Acetyl-L-aminoadipyl-delta-phosphate[c0] + (1) NADPH[c0] <=> (1) N2-Acetyl-L-aminoadipate semialdehyde[c0] + (1) NADP+[c0] + (1) Orthophosphate[c0]	RXN-5183.c
rxn04662_c0	(1) NAD+[c0] + (1) Shikimate[c0] <=> (1) 3-Dehydroshikimate[c0] + (1) H+[c0] + (1) NADH[c0]	RXN-7968.c.araexp.NAD_NADH	R_R06847_c	R06847_c
rxn04674_c0	(1) 2-Phytyl-1,4-naphthoquinone[c0] + (1) S-Adenosyl-L-methionine[c0] => (1) H+[c0] + (1) Phylloquinone[c0] + (1) S-Adenosyl-L-homocysteine[c0]		R_R06859_c	R06859_c
rxn04674_d0	(1) 2-Phytyl-1,4-naphthoquinone[d0] + (1) S-Adenosyl-L-methionine[d0] => (1) H+[d0] + (1) Phylloquinone[d0] + (1) S-Adenosyl-L-homocysteine[d0]		R_R06859_c	R06859_c
rxn04674_m0	(1) 2-Phytyl-1,4-naphthoquinone[m0] + (1) S-Adenosyl-L-methionine[m0] => (1) H+[m0] + (1) Phylloquinone[m0] + (1) S-Adenosyl-L-homocysteine[m0]		R_R06859_c	R06859_c
rxn04674_n0	(1) 2-Phytyl-1,4-naphthoquinone[n0] + (1) S-Adenosyl-L-methionine[n0] => (1) H+[n0] + (1) Phylloquinone[n0] + (1) S-Adenosyl-L-homocysteine[n0]		R_R06859_c	R06859_c
rxn04675_c0	(1) 2-Oxoglutarate[c0] + (1) H+[c0] + (1) Isochorismate[c0] <= (1) (1R,6R)-6-Hydroxy-2-succinylcyclohexa-2,4-diene-1-carboxylate[c0] + (1) CO2[c0] + (1) Pyruvate[c0]			R06860_c
rxn04681_c0	(1) N-Methylethanolamine phosphate[c0] + (1) S-Adenosyl-L-methionine[c0] <=> (1) H+[c0] + (1) Phosphodimethylethanolamine[c0] + (1) S-Adenosyl-L-homocysteine[c0]	RXN-5642.c	R_R06868_c	R06868_c
rxn04682_c0	(1) Phosphodimethylethanolamine[c0] + (1) S-Adenosyl-L-methionine[c0] <= (1) Choline phosphate[c0] + (1) H+[c0] + (1) S-Adenosyl-L-homocysteine[c0]	RXN-5643.c	R_R06869_c	R06869_c
rxn04684_c0	(1) Choline phosphate[c0] + (1) H2O[c0] <=> (1) Choline[c0] + (1) Orthophosphate[c0]	RXN-5647.c
rxn04692_c0	(1) Bisphenol A[c0] + (1) H+[c0] + (1) NADH[c0] + (1) Oxygen[c0] => (1) 1,2-Bis(4-hydroxyphenyl)-2-propanol[c0] + (1) H2O[c0] + (1) NAD+[c0]
rxn04692_r0	(1) Bisphenol A[r0] + (1) H+[r0] + (1) NADH[r0] + (1) Oxygen[r0] => (1) 1,2-Bis(4-hydroxyphenyl)-2-propanol[r0] + (1) H2O[r0] + (1) NAD+[r0]
rxn04697_c0	(1) 2,2-Bis(4-hydroxyphenyl)-1-propanol[c0] + (1) H+[c0] + (1) NADH[c0] + (1) Oxygen[c0] => (1) 2,3-Bis(4-hydroxyphenyl)-1,2-propanediol[c0] + (1) H2O[c0] + (1) NAD+[c0]
rxn04697_r0	(1) 2,2-Bis(4-hydroxyphenyl)-1-propanol[r0] + (1) H+[r0] + (1) NADH[r0] + (1) Oxygen[r0] => (1) 2,3-Bis(4-hydroxyphenyl)-1,2-propanediol[r0] + (1) H2O[r0] + (1) NAD+[r0]
rxn04704_c0	(1) Coproporphyrinogen III[c0] + (2) S-Adenosyl-L-methionine[c0] <=> (2) 5'-Deoxyadenosine[c0] + (2) CO2[c0] + (2) L-Methionine[c0] + (1) Protoporphyrinogen IX[c0]	HEMN-RXN.c	R_R06895_c	R06895_c
rxn04705_c0	(1) Divinylprotochlorophyllide[c0] + (1) H+[c0] + (1) NADPH[c0] <= (1) NADP+[c0] + (1) Protochlorophyllide[c0]
rxn04726_c0	(1) 1-Hydroxymethylnaphthalene[c0] + (1) NAD+[c0] <=> (1) 1-Naphthaldehyde[c0] + (1) H+[c0] + (1) NADH[c0]		R_R06917_c	R06917_c
rxn04727_c0	(1) 1-Naphthaldehyde[c0] + (1) H2O[c0] + (1) NAD+[c0] <= (1) 1-Naphthoic acid[c0] + (2) H+[c0] + (1) NADH[c0]
rxn04736_c0	(1) (2-Naphthyl)methanol[c0] + (1) NAD+[c0] <=> (1) 2-Naphthaldehyde[c0] + (1) H+[c0] + (1) NADH[c0]		R_R06927_c	R06927_c
rxn04751_c0	(1) 5-Carboxy-2-pentenoyl-CoA[c0] + (1) H2O[c0] <=> (1) (3S)-3-Hydroxyadipyl-CoA[c0]	RXN0-6513.c	R_R06942_c	R06942_c
rxn04751_v0	(1) 5-Carboxy-2-pentenoyl-CoA[v0] + (1) H2O[v0] <=> (1) (3S)-3-Hydroxyadipyl-CoA[v0]	RXN0-6513.c	R_R06942_c	R06942_c
rxn04751_x0	(1) 5-Carboxy-2-pentenoyl-CoA[x0] + (1) H2O[x0] <=> (1) (3S)-3-Hydroxyadipyl-CoA[x0]	RXN0-6513.c	R_R06942_c	R06942_c
rxn04755_c0	(1) H+[c0] + (1) NADH[c0] + (1) Oxygen[c0] + (1) Zeaxanthin[c0] => (1) Antheraxanthin[c0] + (1) H2O[c0] + (1) NAD+[c0]			R06946_c
rxn04756_c0	(1) Antheraxanthin[c0] + (1) H+[c0] + (1) NADH[c0] + (1) Oxygen[c0] => (1) H2O[c0] + (1) NAD+[c0] + (1) Violaxanthin[c0]			R06947_c
rxn04759_c0	(1) Violaxanthin[c0] <= (1) 9-cis-Violaxanthin[c0]
rxn04761_c0	(1) 9'-cis-Neoxanthin[c0] + (1) Oxygen[c0] => (1) C25-Allenic-apo-aldehyde[c0] + (1) Xanthoxin[c0]	RXN-698.c		R06952_c
rxn04761_v0	(1) 9'-cis-Neoxanthin[v0] + (1) Oxygen[v0] => (1) C25-Allenic-apo-aldehyde[v0] + (1) Xanthoxin[v0]	RXN-698.c		R06952_c
rxn04762_c0	(1) 9-cis-Violaxanthin[c0] + (1) Oxygen[c0] => (1) C25-Epoxy-apo-aldehyde[c0] + (1) Xanthoxin[c0]	RXN-7974.c		R06953_c
rxn04762_v0	(1) 9-cis-Violaxanthin[v0] + (1) Oxygen[v0] => (1) C25-Epoxy-apo-aldehyde[v0] + (1) Xanthoxin[v0]	RXN-7974.c		R06953_c
rxn04763_c0	(1) NAD+[c0] + (1) Xanthoxin[c0] <=> (1) Abscisic aldehyde[c0] + (1) H+[c0] + (1) NADH[c0]	1.1.1.288-RXN.c
rxn04766_c0	(1) Abscisic aldehyde[c0] + (1) H2O[c0] + (1) Oxygen[c0] => (1) Abscisate[c0] + (1) H+[c0] + (1) Hydrogen peroxide[c0]	1.2.3.14-RXN.c		R06957_c
rxn04769_c0	(1) all-trans-Neurosporene[c0] => (1) alpha-Zeacarotene[c0]	RXN-8040.c	R_R06960_c	R06960_c
rxn04769_r0	(1) all-trans-Neurosporene[r0] => (1) alpha-Zeacarotene[r0]	RXN-8040.c	R_R06960_c	R06960_c
rxn04771_c0	(1) delta-Carotene[c0] <=> (1) alpha-Carotene[c0]	RXN1F-148.c	R_R06962_c	R06962_c
rxn04771_r0	(1) delta-Carotene[r0] => (1) alpha-Carotene[r0]	RXN1F-148.c	R_R06962_c	R06962_c
rxn04772_c0	(1) Lycopene[c0] <=> (1) delta-Carotene[c0]	RXN1F-147.c	R_R06963_c	R06963_c
rxn04772_r0	(1) Lycopene[r0] => (1) delta-Carotene[r0]	RXN1F-147.c	R_R06963_c	R06963_c
rxn04774_c0	(1) gamma-Carotene[c0] => (1) alpha-Carotene[c0]		R_R06965_c	R06965_c
rxn04774_r0	(1) gamma-Carotene[r0] <=> (1) alpha-Carotene[r0]		R_R06965_c	R06965_c
rxn04783_c0	(1) 5'-Phosphoribosylglycinamide[c0] + (1) ATP[c0] + (1) Formate[c0] => (1) 5'-Phosphoribosyl-N-formylglycinamide[c0] + (1) ADP[c0] + (1) H+[c0] + (1) Orthophosphate[c0]	GARTRANSFORMYL2-RXN.c
rxn04791_c0	(1) Formaldehyde[c0] + (1) Glutathione[c0] <=> (1) S-(Hydroxymethyl)glutathione[c0]	RXN-2961.c
rxn04792_c0	(1) NAD+[c0] + (1) S-(Hydroxymethyl)glutathione[c0] <=> (1) H+[c0] + (1) NADH[c0] + (1) S-Formylglutathione[c0]	RXN-2962.c.araexp.NAD_NADH	R_R06983_c	R06983_c
rxn04792_d0	(1) NAD+[d0] + (1) S-(Hydroxymethyl)glutathione[d0] <=> (1) H+[d0] + (1) NADH[d0] + (1) S-Formylglutathione[d0]	RXN-2962.c.araexp.NAD_NADH	R_R06983_c	R06983_c
rxn04793_c0	(1) H+[c0] + (1) NADPH[c0] + (1) trans-Hex-2-enoyl-CoA[c0] => (1) Hexanoyl-CoA[c0] + (1) NADP+[c0]
rxn04809_c0	(1) (1R,2S)-Naphthalene 1,2-oxide[c0] + (1) Glutathione[c0] <=> (1) (1R)-Hydroxy-(2R)-glutathionyl-1,2-dihydronaphthalene[c0]		R_R07002_c	R07002_c
rxn04809_d0	(1) (1R,2S)-Naphthalene 1,2-oxide[d0] + (1) Glutathione[d0] <=> (1) (1R)-Hydroxy-(2R)-glutathionyl-1,2-dihydronaphthalene[d0]		R_R07002_c	R07002_c
rxn04809_n0	(1) (1R,2S)-Naphthalene 1,2-oxide[n0] + (1) Glutathione[n0] <=> (1) (1R)-Hydroxy-(2R)-glutathionyl-1,2-dihydronaphthalene[n0]		R_R07002_c	R07002_c
rxn04809_w0	(1) (1R,2S)-Naphthalene 1,2-oxide[w0] + (1) Glutathione[w0] <=> (1) (1R)-Hydroxy-(2R)-glutathionyl-1,2-dihydronaphthalene[w0]		R_R07002_c	R07002_c
rxn04809_x0	(1) (1R,2S)-Naphthalene 1,2-oxide[x0] + (1) Glutathione[x0] <=> (1) (1R)-Hydroxy-(2R)-glutathionyl-1,2-dihydronaphthalene[x0]		R_R07002_c	R07002_c
rxn04810_c0	(1) (1S,2R)-Naphthalene 1,2-oxide[c0] + (1) Glutathione[c0] <=> (1) (1R)-Glutathionyl-(2R)-hydroxy-1,2-dihydronaphthalene[c0]		R_R07003_c	R07003_c
rxn04810_d0	(1) (1S,2R)-Naphthalene 1,2-oxide[d0] + (1) Glutathione[d0] <=> (1) (1R)-Glutathionyl-(2R)-hydroxy-1,2-dihydronaphthalene[d0]		R_R07003_c	R07003_c
rxn04810_n0	(1) (1S,2R)-Naphthalene 1,2-oxide[n0] + (1) Glutathione[n0] <=> (1) (1R)-Glutathionyl-(2R)-hydroxy-1,2-dihydronaphthalene[n0]		R_R07003_c	R07003_c
rxn04810_w0	(1) (1S,2R)-Naphthalene 1,2-oxide[w0] + (1) Glutathione[w0] <=> (1) (1R)-Glutathionyl-(2R)-hydroxy-1,2-dihydronaphthalene[w0]		R_R07003_c	R07003_c
rxn04810_x0	(1) (1S,2R)-Naphthalene 1,2-oxide[x0] + (1) Glutathione[x0] <=> (1) (1R)-Glutathionyl-(2R)-hydroxy-1,2-dihydronaphthalene[x0]		R_R07003_c	R07003_c
rxn04811_c0	(1) (1S,2R)-Naphthalene 1,2-oxide[c0] + (1) Glutathione[c0] <=> (1) (1S)-Hydroxy-(2S)-glutathionyl-1,2-dihydronaphthalene[c0]		R_R07004_c	R07004_c
rxn04811_d0	(1) (1S,2R)-Naphthalene 1,2-oxide[d0] + (1) Glutathione[d0] <=> (1) (1S)-Hydroxy-(2S)-glutathionyl-1,2-dihydronaphthalene[d0]		R_R07004_c	R07004_c
rxn04811_n0	(1) (1S,2R)-Naphthalene 1,2-oxide[n0] + (1) Glutathione[n0] <=> (1) (1S)-Hydroxy-(2S)-glutathionyl-1,2-dihydronaphthalene[n0]		R_R07004_c	R07004_c
rxn04811_w0	(1) (1S,2R)-Naphthalene 1,2-oxide[w0] + (1) Glutathione[w0] <=> (1) (1S)-Hydroxy-(2S)-glutathionyl-1,2-dihydronaphthalene[w0]		R_R07004_c	R07004_c
rxn04811_x0	(1) (1S,2R)-Naphthalene 1,2-oxide[x0] + (1) Glutathione[x0] <=> (1) (1S)-Hydroxy-(2S)-glutathionyl-1,2-dihydronaphthalene[x0]		R_R07004_c	R07004_c
rxn04830_c0	(1) 1-Nitronaphthalene-7,8-oxide[c0] + (1) Glutathione[c0] <=> (1) 1-Nitro-7-hydroxy-8-glutathionyl-7,8-dihydronaphthalene[c0]		R_R07023_c	R07023_c
rxn04830_d0	(1) 1-Nitronaphthalene-7,8-oxide[d0] + (1) Glutathione[d0] <=> (1) 1-Nitro-7-hydroxy-8-glutathionyl-7,8-dihydronaphthalene[d0]		R_R07023_c	R07023_c
rxn04830_n0	(1) 1-Nitronaphthalene-7,8-oxide[n0] + (1) Glutathione[n0] <=> (1) 1-Nitro-7-hydroxy-8-glutathionyl-7,8-dihydronaphthalene[n0]		R_R07023_c	R07023_c
rxn04830_w0	(1) 1-Nitronaphthalene-7,8-oxide[w0] + (1) Glutathione[w0] <=> (1) 1-Nitro-7-hydroxy-8-glutathionyl-7,8-dihydronaphthalene[w0]		R_R07023_c	R07023_c
rxn04830_x0	(1) 1-Nitronaphthalene-7,8-oxide[x0] + (1) Glutathione[x0] <=> (1) 1-Nitro-7-hydroxy-8-glutathionyl-7,8-dihydronaphthalene[x0]		R_R07023_c	R07023_c
rxn04831_c0	(1) 1-Nitronaphthalene-7,8-oxide[c0] + (1) Glutathione[c0] <=> (1) 1-Nitro-7-glutathionyl-8-hydroxy-7,8-dihydronaphthalene[c0]		R_R07024_c	R07024_c
rxn04831_d0	(1) 1-Nitronaphthalene-7,8-oxide[d0] + (1) Glutathione[d0] <=> (1) 1-Nitro-7-glutathionyl-8-hydroxy-7,8-dihydronaphthalene[d0]		R_R07024_c	R07024_c
rxn04831_n0	(1) 1-Nitronaphthalene-7,8-oxide[n0] + (1) Glutathione[n0] <=> (1) 1-Nitro-7-glutathionyl-8-hydroxy-7,8-dihydronaphthalene[n0]		R_R07024_c	R07024_c
rxn04831_w0	(1) 1-Nitronaphthalene-7,8-oxide[w0] + (1) Glutathione[w0] <=> (1) 1-Nitro-7-glutathionyl-8-hydroxy-7,8-dihydronaphthalene[w0]		R_R07024_c	R07024_c
rxn04831_x0	(1) 1-Nitronaphthalene-7,8-oxide[x0] + (1) Glutathione[x0] <=> (1) 1-Nitro-7-glutathionyl-8-hydroxy-7,8-dihydronaphthalene[x0]		R_R07024_c	R07024_c
rxn04832_c0	(1) 1-Nitronaphthalene-5,6-oxide[c0] + (1) Glutathione[c0] <=> (1) 1-Nitro-5-hydroxy-6-glutathionyl-5,6-dihydronaphthalene[c0]		R_R07025_c	R07025_c
rxn04832_d0	(1) 1-Nitronaphthalene-5,6-oxide[d0] + (1) Glutathione[d0] <=> (1) 1-Nitro-5-hydroxy-6-glutathionyl-5,6-dihydronaphthalene[d0]		R_R07025_c	R07025_c
rxn04832_n0	(1) 1-Nitronaphthalene-5,6-oxide[n0] + (1) Glutathione[n0] <=> (1) 1-Nitro-5-hydroxy-6-glutathionyl-5,6-dihydronaphthalene[n0]		R_R07025_c	R07025_c
rxn04832_w0	(1) 1-Nitronaphthalene-5,6-oxide[w0] + (1) Glutathione[w0] <=> (1) 1-Nitro-5-hydroxy-6-glutathionyl-5,6-dihydronaphthalene[w0]		R_R07025_c	R07025_c
rxn04832_x0	(1) 1-Nitronaphthalene-5,6-oxide[x0] + (1) Glutathione[x0] <=> (1) 1-Nitro-5-hydroxy-6-glutathionyl-5,6-dihydronaphthalene[x0]		R_R07025_c	R07025_c
rxn04833_c0	(1) 1-Nitronaphthalene-5,6-oxide[c0] + (1) Glutathione[c0] <=> (1) 1-Nitro-5-glutathionyl-6-hydroxy-5,6-dihydronaphthalene[c0]		R_R07026_c	R07026_c
rxn04833_d0	(1) 1-Nitronaphthalene-5,6-oxide[d0] + (1) Glutathione[d0] <=> (1) 1-Nitro-5-glutathionyl-6-hydroxy-5,6-dihydronaphthalene[d0]		R_R07026_c	R07026_c
rxn04833_n0	(1) 1-Nitronaphthalene-5,6-oxide[n0] + (1) Glutathione[n0] <=> (1) 1-Nitro-5-glutathionyl-6-hydroxy-5,6-dihydronaphthalene[n0]		R_R07026_c	R07026_c
rxn04833_w0	(1) 1-Nitronaphthalene-5,6-oxide[w0] + (1) Glutathione[w0] <=> (1) 1-Nitro-5-glutathionyl-6-hydroxy-5,6-dihydronaphthalene[w0]		R_R07026_c	R07026_c
rxn04833_x0	(1) 1-Nitronaphthalene-5,6-oxide[x0] + (1) Glutathione[x0] <=> (1) 1-Nitro-5-glutathionyl-6-hydroxy-5,6-dihydronaphthalene[x0]		R_R07026_c	R07026_c
rxn04840_c0	(1) 5(S)-HPETE[c0] + (2) Glutathione[c0] => (1) 5(S)-HETE[c0] + (1) Glutathione disulfide[c0] + (1) H2O[c0]		R_R07034_c	R07034_c
rxn04840_d0	(1) 5(S)-HPETE[d0] + (2) Glutathione[d0] => (1) 5(S)-HETE[d0] + (1) Glutathione disulfide[d0] + (1) H2O[d0]		R_R07034_c	R07034_c
rxn04840_m0	(1) 5(S)-HPETE[m0] + (2) Glutathione[m0] => (1) 5(S)-HETE[m0] + (1) Glutathione disulfide[m0] + (1) H2O[m0]		R_R07034_c	R07034_c
rxn04840_n0	(1) 5(S)-HPETE[n0] + (2) Glutathione[n0] => (1) 5(S)-HETE[n0] + (1) Glutathione disulfide[n0] + (1) H2O[n0]		R_R07034_c	R07034_c
rxn04841_c0	(1) 15(S)-HPETE[c0] + (2) Glutathione[c0] => (1) (15S)-15-Hydroxy-5,8,11-cis-13-trans-eicosatetraenoate[c0] + (1) Glutathione disulfide[c0] + (1) H2O[c0]		R_R07035_c	R07035_c
rxn04841_d0	(1) 15(S)-HPETE[d0] + (2) Glutathione[d0] => (1) (15S)-15-Hydroxy-5,8,11-cis-13-trans-eicosatetraenoate[d0] + (1) Glutathione disulfide[d0] + (1) H2O[d0]		R_R07035_c	R07035_c
rxn04841_m0	(1) 15(S)-HPETE[m0] + (2) Glutathione[m0] => (1) (15S)-15-Hydroxy-5,8,11-cis-13-trans-eicosatetraenoate[m0] + (1) Glutathione disulfide[m0] + (1) H2O[m0]		R_R07035_c	R07035_c
rxn04841_n0	(1) 15(S)-HPETE[n0] + (2) Glutathione[n0] => (1) (15S)-15-Hydroxy-5,8,11-cis-13-trans-eicosatetraenoate[n0] + (1) Glutathione disulfide[n0] + (1) H2O[n0]		R_R07035_c	R07035_c
rxn04863_c0	(1) Linoleate[c0] + (1) Oxygen[c0] => (1) 9(S)-HPODE[c0]
rxn04872_c0	(1) Bromobenzene-3,4-oxide[c0] + (1) Glutathione[c0] <=> (1) 3,4-Dihydro-3-hydroxy-4-S-glutathionyl bromobenzene[c0]		R_R07069_c	R07069_c
rxn04872_d0	(1) Bromobenzene-3,4-oxide[d0] + (1) Glutathione[d0] <=> (1) 3,4-Dihydro-3-hydroxy-4-S-glutathionyl bromobenzene[d0]		R_R07069_c	R07069_c
rxn04872_n0	(1) Bromobenzene-3,4-oxide[n0] + (1) Glutathione[n0] <=> (1) 3,4-Dihydro-3-hydroxy-4-S-glutathionyl bromobenzene[n0]		R_R07069_c	R07069_c
rxn04872_w0	(1) Bromobenzene-3,4-oxide[w0] + (1) Glutathione[w0] <=> (1) 3,4-Dihydro-3-hydroxy-4-S-glutathionyl bromobenzene[w0]		R_R07069_c	R07069_c
rxn04872_x0	(1) Bromobenzene-3,4-oxide[x0] + (1) Glutathione[x0] <=> (1) 3,4-Dihydro-3-hydroxy-4-S-glutathionyl bromobenzene[x0]		R_R07069_c	R07069_c
rxn04873_c0	(1) Bromobenzene-2,3-oxide[c0] + (1) Glutathione[c0] <=> (1) 2,3-Dihydro-2-S-glutathionyl-3-hydroxy bromobenzene[c0]		R_R07070_c	R07070_c
rxn04873_d0	(1) Bromobenzene-2,3-oxide[d0] + (1) Glutathione[d0] <=> (1) 2,3-Dihydro-2-S-glutathionyl-3-hydroxy bromobenzene[d0]		R_R07070_c	R07070_c
rxn04873_n0	(1) Bromobenzene-2,3-oxide[n0] + (1) Glutathione[n0] <=> (1) 2,3-Dihydro-2-S-glutathionyl-3-hydroxy bromobenzene[n0]		R_R07070_c	R07070_c
rxn04873_w0	(1) Bromobenzene-2,3-oxide[w0] + (1) Glutathione[w0] <=> (1) 2,3-Dihydro-2-S-glutathionyl-3-hydroxy bromobenzene[w0]		R_R07070_c	R07070_c
rxn04873_x0	(1) Bromobenzene-2,3-oxide[x0] + (1) Glutathione[x0] <=> (1) 2,3-Dihydro-2-S-glutathionyl-3-hydroxy bromobenzene[x0]		R_R07070_c	R07070_c
rxn04886_c0	(1) Benzo[a]pyrene-4,5-oxide[c0] + (1) Glutathione[c0] <=> (1) 4,5-Dihydro-4-hydroxy-5-S-glutathionyl-benzo[a]pyrene[c0]		R_R07083_c	R07083_c
rxn04886_d0	(1) Benzo[a]pyrene-4,5-oxide[d0] + (1) Glutathione[d0] <=> (1) 4,5-Dihydro-4-hydroxy-5-S-glutathionyl-benzo[a]pyrene[d0]		R_R07083_c	R07083_c
rxn04886_n0	(1) Benzo[a]pyrene-4,5-oxide[n0] + (1) Glutathione[n0] <=> (1) 4,5-Dihydro-4-hydroxy-5-S-glutathionyl-benzo[a]pyrene[n0]		R_R07083_c	R07083_c
rxn04886_w0	(1) Benzo[a]pyrene-4,5-oxide[w0] + (1) Glutathione[w0] <=> (1) 4,5-Dihydro-4-hydroxy-5-S-glutathionyl-benzo[a]pyrene[w0]		R_R07083_c	R07083_c
rxn04886_x0	(1) Benzo[a]pyrene-4,5-oxide[x0] + (1) Glutathione[x0] <=> (1) 4,5-Dihydro-4-hydroxy-5-S-glutathionyl-benzo[a]pyrene[x0]		R_R07083_c	R07083_c
rxn04894_c0	(1) 2,2-Dichloroacetaldehyde[c0] + (1) Glutathione[c0] <= (1) S-(2,2-Dichloro-1-hydroxy)ethyl glutathione[c0]		R_R07091_c	R07091_c
rxn04894_d0	(1) 2,2-Dichloroacetaldehyde[d0] + (1) Glutathione[d0] <= (1) S-(2,2-Dichloro-1-hydroxy)ethyl glutathione[d0]		R_R07091_c	R07091_c
rxn04894_n0	(1) 2,2-Dichloroacetaldehyde[n0] + (1) Glutathione[n0] <= (1) S-(2,2-Dichloro-1-hydroxy)ethyl glutathione[n0]		R_R07091_c	R07091_c
rxn04894_w0	(1) 2,2-Dichloroacetaldehyde[w0] + (1) Glutathione[w0] <= (1) S-(2,2-Dichloro-1-hydroxy)ethyl glutathione[w0]		R_R07091_c	R07091_c
rxn04894_x0	(1) 2,2-Dichloroacetaldehyde[x0] + (1) Glutathione[x0] <= (1) S-(2,2-Dichloro-1-hydroxy)ethyl glutathione[x0]		R_R07091_c	R07091_c
rxn04895_c0	(1) 1,1-Dichloroethylene epoxide[c0] + (1) Glutathione[c0] <=> (1) 2-(S-Glutathionyl)acetyl chloride[c0] + (1) Cl-[c0] + (1) H+[c0]		R_R07092_c	R07092_c
rxn04895_d0	(1) 1,1-Dichloroethylene epoxide[d0] + (1) Glutathione[d0] <=> (1) 2-(S-Glutathionyl)acetyl chloride[d0] + (1) Cl-[d0] + (1) H+[d0]		R_R07092_c	R07092_c
rxn04895_n0	(1) 1,1-Dichloroethylene epoxide[n0] + (1) Glutathione[n0] <=> (1) 2-(S-Glutathionyl)acetyl chloride[n0] + (1) Cl-[n0] + (1) H+[n0]		R_R07092_c	R07092_c
rxn04895_w0	(1) 1,1-Dichloroethylene epoxide[w0] + (1) Glutathione[w0] <=> (1) 2-(S-Glutathionyl)acetyl chloride[w0] + (1) Cl-[w0] + (1) H+[w0]		R_R07092_c	R07092_c
rxn04895_x0	(1) 1,1-Dichloroethylene epoxide[x0] + (1) Glutathione[x0] <=> (1) 2-(S-Glutathionyl)acetyl chloride[x0] + (1) Cl-[x0] + (1) H+[x0]		R_R07092_c	R07092_c
rxn04896_c0	(1) Chloroacetyl chloride[c0] + (1) Glutathione[c0] <=> (1) Cl-[c0] + (1) H+[c0] + (1) S-(2-Chloroacetyl)glutathione[c0]		R_R07093_c	R07093_c
rxn04896_d0	(1) Chloroacetyl chloride[d0] + (1) Glutathione[d0] <=> (1) Cl-[d0] + (1) H+[d0] + (1) S-(2-Chloroacetyl)glutathione[d0]		R_R07093_c	R07093_c
rxn04896_n0	(1) Chloroacetyl chloride[n0] + (1) Glutathione[n0] <=> (1) Cl-[n0] + (1) H+[n0] + (1) S-(2-Chloroacetyl)glutathione[n0]		R_R07093_c	R07093_c
rxn04896_w0	(1) Chloroacetyl chloride[w0] + (1) Glutathione[w0] <=> (1) Cl-[w0] + (1) H+[w0] + (1) S-(2-Chloroacetyl)glutathione[w0]		R_R07093_c	R07093_c
rxn04896_x0	(1) Chloroacetyl chloride[x0] + (1) Glutathione[x0] <=> (1) Cl-[x0] + (1) H+[x0] + (1) S-(2-Chloroacetyl)glutathione[x0]		R_R07093_c	R07093_c
rxn04903_c0	(1) Glutathione[c0] + (1) Trichloroethene[c0] <=> (1) Cl-[c0] + (1) H+[c0] + (1) S-(1,2-Dichlorovinyl)glutathione[c0]		R_R07100_c	R07100_c
rxn04903_d0	(1) Glutathione[d0] + (1) Trichloroethene[d0] <=> (1) Cl-[d0] + (1) H+[d0] + (1) S-(1,2-Dichlorovinyl)glutathione[d0]		R_R07100_c	R07100_c
rxn04903_n0	(1) Glutathione[n0] + (1) Trichloroethene[n0] <=> (1) Cl-[n0] + (1) H+[n0] + (1) S-(1,2-Dichlorovinyl)glutathione[n0]		R_R07100_c	R07100_c
rxn04903_w0	(1) Glutathione[w0] + (1) Trichloroethene[w0] <=> (1) Cl-[w0] + (1) H+[w0] + (1) S-(1,2-Dichlorovinyl)glutathione[w0]		R_R07100_c	R07100_c
rxn04903_x0	(1) Glutathione[x0] + (1) Trichloroethene[x0] <=> (1) Cl-[x0] + (1) H+[x0] + (1) S-(1,2-Dichlorovinyl)glutathione[x0]		R_R07100_c	R07100_c
rxn04908_c0	(1) Chloral hydrate[c0] + (1) H+[c0] + (1) NADH[c0] => (1) H2O[c0] + (1) NAD+[c0] + (1) Trichloroethanol[c0]		R_R07105_c	R07105_c
rxn04916_c0	(1) 1,2-Dibromoethane[c0] + (1) Glutathione[c0] <=> (2) Bromide[c0] + (1) Glutathione episulfonium ion[c0] + (1) H+[c0]		R_R07113_c	R07113_c
rxn04916_n0	(1) 1,2-Dibromoethane[n0] + (1) Glutathione[n0] <=> (2) Bromide[n0] + (1) Glutathione episulfonium ion[n0] + (1) H+[n0]		R_R07113_c	R07113_c
rxn04916_w0	(1) 1,2-Dibromoethane[w0] + (1) Glutathione[w0] <=> (2) Bromide[w0] + (1) Glutathione episulfonium ion[w0] + (1) H+[w0]		R_R07113_c	R07113_c
rxn04916_x0	(1) 1,2-Dibromoethane[x0] + (1) Glutathione[x0] <=> (2) Bromide[x0] + (1) Glutathione episulfonium ion[x0] + (1) H+[x0]		R_R07113_c	R07113_c
rxn04919_c0	(1) 2-Bromoacetaldehyde[c0] + (1) Glutathione[c0] <=> (1) Bromide[c0] + (1) H+[c0] + (1) S-(Formylmethyl)glutathione[c0]		R_R07116_c	R07116_c
rxn04919_n0	(1) 2-Bromoacetaldehyde[n0] + (1) Glutathione[n0] <=> (1) Bromide[n0] + (1) H+[n0] + (1) S-(Formylmethyl)glutathione[n0]		R_R07116_c	R07116_c
rxn04919_w0	(1) 2-Bromoacetaldehyde[w0] + (1) Glutathione[w0] <=> (1) Bromide[w0] + (1) H+[w0] + (1) S-(Formylmethyl)glutathione[w0]		R_R07116_c	R07116_c
rxn04919_x0	(1) 2-Bromoacetaldehyde[x0] + (1) Glutathione[x0] <=> (1) Bromide[x0] + (1) H+[x0] + (1) S-(Formylmethyl)glutathione[x0]		R_R07116_c	R07116_c
rxn04924_c0	(1) H2O[c0] + (1) Vernolic acid[c0] <=> (1) 12,13-DHOME[c0]	RXN-12134.c
rxn04938_c0	(1) NADP+[c0] + (1) S-(Hydroxymethyl)glutathione[c0] <=> (1) H+[c0] + (1) NADPH[c0] + (1) S-Formylglutathione[c0]	RXN-2962.c.araexp.NADP_NADPH
rxn04938_d0	(1) NADP+[d0] + (1) S-(Hydroxymethyl)glutathione[d0] <=> (1) H+[d0] + (1) NADPH[d0] + (1) S-Formylglutathione[d0]	RXN-2962.c.araexp.NADP_NADPH
rxn04939_c0	(1) 2'-Deoxymugineic acid[c0] + (1) NAD+[c0] <=> (1) 3''-Deamino-3''-oxonicotianamine[c0] + (1) H+[c0] + (1) NADH[c0]	1.1.1.285-RXN.c.araexp.NAD_NADH
rxn04940_c0	(1) 2'-Deoxymugineic acid[c0] + (1) NADP+[c0] <=> (1) 3''-Deamino-3''-oxonicotianamine[c0] + (1) H+[c0] + (1) NADPH[c0]	1.1.1.285-RXN.c.araexp.NADP_NADPH
rxn04943_c0	(1) L-Iditol[c0] + (1) NAD+[c0] <=> (1) H+[c0] + (1) L-Sorbose[c0] + (1) NADH[c0]	L-IDITOL-2-DEHYDROGENASE-RXN.c
rxn04947_c0	(1) 3beta-Hydroxy-4beta-methyl-5alpha-cholest-7-ene-4alpha-carboxylate[c0] + (1) NADP+[c0] <=> (1) 4alpha-Methyl-5alpha-cholest-7-en-3-one[c0] + (1) CO2[c0] + (1) NADPH[c0]	1.1.1.170-RXN.c.araexp.NADP_NADPH
rxn04954_c0	(1) 5-Methyltetrahydrofolate[c0] + (1) NAD+[c0] <=> (1) 5,10-Methylenetetrahydrofolate[c0] + (1) H+[c0] + (1) NADH[c0]	1.5.1.20-RXN.c
rxn04957_c0	(1) H+[c0] + (1) NADH[c0] + (1) Oxygen[c0] => (1) Hydrogen peroxide[c0] + (1) NAD+[c0]	RXN-10745.c.araexp.NAD_NADH
rxn04957_w0	(1) H+[w0] + (1) NADH[w0] + (1) Oxygen[w0] => (1) Hydrogen peroxide[w0] + (1) NAD+[w0]	RXN-10745.c.araexp.NAD_NADH
rxn04958_c0	(1) H+[c0] + (1) NADPH[c0] + (1) Oxygen[c0] => (1) Hydrogen peroxide[c0] + (1) NADP+[c0]	RXN-10745.c.araexp.NADP_NADPH
rxn04958_w0	(1) H+[w0] + (1) NADPH[w0] + (1) Oxygen[w0] <=> (1) Hydrogen peroxide[w0] + (1) NADP+[w0]	RXN-10745.c.araexp.NADP_NADPH
rxn04962_c0	(1) Ascorbate[c0] + (1) Violaxanthin[c0] <=> (1) Antheraxanthin[c0] + (1) Dehydroascorbate[c0] + (1) H2O[c0]			R07178_c
rxn04963_c0	(1) Antheraxanthin[c0] + (1) Ascorbate[c0] <=> (1) Dehydroascorbate[c0] + (1) H2O[c0] + (1) Zeaxanthin[c0]			R07179_c
rxn04965_c0	(1) 2-Oxoglutarate[c0] + (1) Gibberellin A44[c0] + (1) Oxygen[c0] <= (1) CO2[c0] + (1) Gibberellin A19[c0] + (1) H+[c0] + (1) Succinate[c0]			R07184_c
rxn04971_c0	(1) H+[c0] + (1) N,N-Dihydroxy-L-tyrosine[c0] => (1) (Z)-4-Hydroxyphenylacetaldehyde oxime[c0] + (1) CO2[c0] + (1) H2O[c0]	RXN-7749.c
rxn04978_c0	(1) H+[c0] + (1) NADPH[c0] + (1) Oxygen[c0] + (1) Zeaxanthin[c0] => (1) Antheraxanthin[c0] + (1) H2O[c0] + (1) NADP+[c0]	RXN-325.c		R07199_c
rxn04979_c0	(1) Antheraxanthin[c0] + (1) H+[c0] + (1) NADPH[c0] + (1) Oxygen[c0] => (1) H2O[c0] + (1) NADP+[c0] + (1) Violaxanthin[c0]	RXN-314.c		R07200_c
rxn04981_c0	(1) Abscisate[c0] + (1) H+[c0] + (1) NADPH[c0] + (1) Oxygen[c0] => (1) 8'-Hydroxyabscisate[c0] + (1) H2O[c0] + (1) NADP+[c0]	1.14.13.93-RXN.c
rxn04992_c0	(1) 1-Aminocyclopropane-1-carboxylate[c0] + (1) Ascorbate[c0] + (1) Oxygen[c0] <=> (1) CO2[c0] + (1) Cyanide[c0] + (1) Dehydroascorbate[c0] + (1) Ethylene[c0] + (2) H2O[c0]
rxn04992_g0	(1) 1-Aminocyclopropane-1-carboxylate[g0] + (1) Ascorbate[g0] + (1) Oxygen[g0] <=> (1) CO2[g0] + (1) Cyanide[g0] + (1) Dehydroascorbate[g0] + (1) Ethylene[g0] + (2) H2O[g0]
rxn04992_r0	(1) 1-Aminocyclopropane-1-carboxylate[r0] + (1) Ascorbate[r0] + (1) Oxygen[r0] <=> (1) CO2[r0] + (1) Cyanide[r0] + (1) Dehydroascorbate[r0] + (1) Ethylene[r0] + (2) H2O[r0]
rxn04993_c0	(1) H+[c0] + (1) Lathosterol[c0] + (1) NADPH[c0] + (1) Oxygen[c0] => (1) 7-Dehydrocholesterol[c0] + (2) H2O[c0] + (1) NADP+[c0]	1.14.21.6-RXN.c.araexp.NADP_NADPH
rxn04996_c0	(1) Dimethylallyl diphosphate[c0] + (1) H2O[c0] + (1) NADP+[c0] <=> (1) 1-Hydroxy-2-methyl-2-butenyl 4-diphosphate[c0] + (1) H+[c0] + (1) NADPH[c0]
rxn05001_c0	(2) Eriodictyol chalcone[c0] + (1) Oxygen[c0] <= (2) Aureusidin[c0] + (2) H2O[c0]
rxn05003_c0	(1) 3-Demethylubiquinone-9[c0] + (1) S-Adenosyl-L-methionine[c0] <=> (1) H+[c0] + (1) S-Adenosyl-L-homocysteine[c0] + (1) Ubiquinone-9[c0]
rxn05004_c0	(1) S-Adenosyl-L-methionine[c0] + (1) gamma-Tocopherol[c0] => (1) H+[c0] + (1) S-Adenosyl-L-homocysteine[c0] + (1) alpha-Tocopherol[c0]
rxn05005_c0	(1) S-Adenosyl-L-methionine[c0] + (1) Uroporphyrinogen III[c0] <=> (1) H+[c0] + (1) Precorrin 1[c0] + (1) S-Adenosyl-L-homocysteine[c0]	UROPORIIIMETHYLTRANSA-RXN.c
rxn05006_c0	(1) Precorrin 1[c0] + (1) S-Adenosyl-L-methionine[c0] <=> (1) Precorrin 2[c0] + (1) S-Adenosyl-L-homocysteine[c0]	RXN-8675.c
rxn05012_c0	(1) Carbamoyl phosphate[c0] + (1) N-Acetylornithine[c0] => (1) H+[c0] + (1) N-Acetyl-L-citrulline[c0] + (1) Orthophosphate[c0]
rxn05017_c0	(1) Acetyl-CoA[c0] + (10) H+[c0] + (8) Malonyl-CoA[c0] + (11) NADPH[c0] + (1) S-Adenosyl-L-methionine[c0] <= (1) Dihydromonacolin L[c0]
rxn05022_c0	(1) UDP-glucose[c0] + (1) cis-Zeatin[c0] <=> (1) O-beta-D-Glucopyranosyl-cis-zeatin[c0] + (1) UDP[c0]	RXN-4735.c.araexp.CPD-12575
rxn05024_c0	(1) 2-Succinylbenzoyl-CoA[c0] + (1) H+[c0] <=> (1) 1,4-Dihydroxy-2-naphthoyl-CoA[c0] + (1) H2O[c0]	NAPHTHOATE-SYN-RXN.c	R_R07263_c	R07263_c
rxn05024_d0	(1) 2-Succinylbenzoyl-CoA[d0] + (1) H+[d0] => (1) 1,4-Dihydroxy-2-naphthoyl-CoA[d0] + (1) H2O[d0]	NAPHTHOATE-SYN-RXN.c	R_R07263_c	R07263_c
rxn05028_c0	(1) Isopentenyl diphosphate[c0] + (1) all-trans-Octaprenyl diphosphate[c0] <=> (1) Diphosphate[c0] + (1) H+[c0] + (1) all-trans-Nonaprenyl diphosphate[c0]
rxn05028_d0	(1) Isopentenyl diphosphate[d0] + (1) all-trans-Octaprenyl diphosphate[d0] => (1) Diphosphate[d0] + (1) H+[d0] + (1) all-trans-Nonaprenyl diphosphate[d0]
rxn05028_m0	(1) Isopentenyl diphosphate[m0] + (1) all-trans-Octaprenyl diphosphate[m0] => (1) Diphosphate[m0] + (1) H+[m0] + (1) all-trans-Nonaprenyl diphosphate[m0]
rxn05028_r0	(1) Isopentenyl diphosphate[r0] + (1) all-trans-Octaprenyl diphosphate[r0] => (1) Diphosphate[r0] + (1) H+[r0] + (1) all-trans-Nonaprenyl diphosphate[r0]
rxn05031_c0	(1) Prephytoene diphosphate[c0] => (1) Diphosphate[c0] + (1) H+[c0] + (1) Phytoene[c0]	RXN-12245.c|RXN-8002.c		R07270_c
rxn05034_c0	(1) 4-Hydroxybenzoate[c0] + (1) all-trans-Nonaprenyl diphosphate[c0] => (1) 3-Nonaprenyl-4-hydroxybenzoate[c0] + (1) Diphosphate[c0] + (1) H+[c0]	2.5.1.39-RXN.c
rxn05036_c0	(1) 2-Oxoglutarate[c0] + (1) L-Arogenate[c0] <=> (1) L-Glutamate[c0] + (1) Prephenate[c0]
rxn05037_c0	(1) 2-Oxoglutarate[c0] + (1) Nicotianamine[c0] <=> (1) 3''-Deamino-3''-oxonicotianamine[c0] + (1) L-Glutamate[c0]	2.6.1.80-RXN.c
rxn05038_c0	(1) ATP[c0] + (1) myo-Inositol[c0] => (1) 1D-myo-Inositol 3-phosphate[c0] + (1) ADP[c0] + (1) H+[c0]	MYO-INOSITOL-1-KINASE-RXN.c
rxn05039_c0	(1) 5-Amino-6-(5'-phospho-D-ribitylamino)uracil[c0] + (1) H2O[c0] <=> (1) 5-Amino-6-(1-D-ribitylamino)uracil[c0] + (1) Orthophosphate[c0]	RIBOPHOSPHAT-RXN.c
rxn05040_c0	(1) D-Ribulose 5-phosphate[c0] => (1) Formate[c0] + (1) H+[c0] + (1) L-3,4-Dihydroxybutan-2-one 4-phosphate[c0]	DIOHBUTANONEPSYN-RXN.c	R_R07281_c	R07281_c
rxn05044_c0	(1) Formyl-CoA[c0] + (1) Oxalate[c0] <= (1) Formate[c0] + (1) Oxalyl-CoA[c0]
rxn05049_c0	(1) Choloyl-CoA[c0] + (1) H2O[c0] => (1) Cholic acid[c0] + (1) CoA[c0] + (1) H+[c0]	3.1.2.27-RXN.c
rxn05055_c0	(1) H2O[c0] + (1) N-Benzylformamide[c0] <=> (1) Benzylamine[c0] + (1) Formate[c0]	3.5.1.91-RXN.c
rxn05064_c0	(1) Carbamate[c0] + (2) H+[c0] <=> (1) CO2[c0] + (1) NH3[c0]	RXN0-5222.c
rxn05065_c0	(1) 2,7,4'-Trihydroxyisoflavanone[c0] <=> (1) Daidzein[c0] + (1) H+[c0] + (1) H2O[c0]	RXN-3284.c
rxn05068_c0	(1) Violaxanthin[c0] <=> (1) Capsorubin[c0]	RXN-7946.c
rxn05069_c0	(1) Antheraxanthin[c0] <=> (1) Capsanthin[c0]	RXN-7947.c
rxn05089_c0	(1) H2O[c0] + (1) Oxygen[c0] + (1) Prenyl-L-cysteine[c0] => (1) 3-Methyl-2-butenal[c0] + (1) Hydrogen peroxide[c0] + (1) L-Cysteine[c0]	1.8.3.5-RXN.c		R07360_c
rxn05091_c0	(1) 1,2-Dihydroxy-5-(methylthio)pent-1-en-3-one[c0] + (1) Oxygen[c0] <=> (1) 3-(Methylthio)propionic acid[c0] + (1) CO[c0] + (1) Formate[c0] + (1) H+[c0]	R146-RXN.c
rxn05092_c0	(1) 1,2-Dihydroxy-5-(methylthio)pent-1-en-3-one[c0] + (1) Oxygen[c0] => (1) 4-Methylthio-2-oxobutanoic acid[c0] + (1) Formate[c0] + (2) H+[c0]	R147-RXN.c
rxn05093_c0	(4) H2O[c0] + (1) Oxygen[c0] + (4) Sulfur[c0] => (4) H+[c0] + (2) Hydrogen sulfide[c0] + (2) Sulfite[c0]
rxn05094_c0	(1) 2-Oxoglutarate[c0] + (1) Leucocyanidin[c0] + (1) Oxygen[c0] => (1) CO2[c0] + (1) H2O[c0] + (1) Succinate[c0] + (1) cis-Dihydroquercetin[c0]			R07366_c
rxn05104_c0	(1) S-Methyl-5-thio-D-ribulose 1-phosphate[c0] => (1) 2,3-Diketo-5-methylthiopentyl-1-phosphate[c0] + (1) H2O[c0]	R145-RXN.c
rxn05105_c0	(1) 2,3-Diketo-5-methylthiopentyl-1-phosphate[c0] <=> (1) 2-Hydroxy-3-keto-5-methylthiopentenyl-1-phosphate[c0]	R82-RXN.c
rxn05106_c0	(1) 2-Hydroxy-3-keto-5-methylthiopentenyl-1-phosphate[c0] + (1) H2O[c0] <=> (1) 1,2-Dihydroxy-5-(methylthio)pent-1-en-3-one[c0] + (1) Orthophosphate[c0]	R83-RXN.c
rxn05107_c0	(1) 2,3-Diketo-5-methylthiopentyl-1-phosphate[c0] + (1) H2O[c0] <=> (1) 1,2-Dihydroxy-5-(methylthio)pent-1-en-3-one[c0] + (1) Orthophosphate[c0]	3.1.3.77-RXN.c
rxn05108_c0	(1) 4-Methylthio-2-oxobutanoic acid[c0] + (1) L-Glutamate[c0] <=> (1) 2-Oxoglutarate[c0] + (1) L-Methionine[c0]		R_R07396_c	R07396_c
rxn05109_c0	(1) Acetyl-CoA[c0] + (1) H2O[c0] + (1) Pyruvate[c0] => (1) (R)-2-Methylmalate[c0] + (1) CoA[c0] + (1) H+[c0]
rxn05114_c0	(1) ATP[c0] + (1) Aminoimidazole ribotide[c0] + (1) HCO3-[c0] => (1) 5-Carboxyamino-1-(5-phospho-D-ribosyl)imidazole[c0] + (1) ADP[c0] + (2) H+[c0] + (1) Orthophosphate[c0]
rxn05115_c0	(1) 5-Carboxyamino-1-(5-phospho-D-ribosyl)imidazole[c0] + (1) H+[c0] <=> (1) 1-(5-Phospho-D-ribosyl)-5-amino-4-imidazolecarboxylate[c0]	RXN0-743.c
rxn05115_d0	(1) 5-Carboxyamino-1-(5-phospho-D-ribosyl)imidazole[d0] + (1) H+[d0] <= (1) 1-(5-Phospho-D-ribosyl)-5-amino-4-imidazolecarboxylate[d0]	RXN0-743.c
rxn05118_c0	(1) 4-Aminobutyraldehyde[c0] <=> (1) 1-Pyrroline[c0] + (1) H2O[c0]	RXN-6423.c
rxn05120_c0	(1) H2O[c0] + (1) Heme[c0] + (1) trans,trans-Farnesyl diphosphate[c0] => (1) Diphosphate[c0] + (1) H+[c0] + (1) Heme O[c0]	HEMEOSYN-RXN.c
rxn05136_c0	(1) Quinate[c0] + (1) p-Coumaroyl-CoA[c0] => (1) CoA[c0] + (1) p-Coumaroyl quinic acid[c0]	RXN-2601.c
rxn05137_c0	(1) 5-O-Caffeoylshikimic acid[c0] + (1) CoA[c0] <=> (1) Caffeoyl-CoA[c0] + (1) Shikimate[c0]
rxn05142_c0	(1) H2O[c0] + (1) NAD+[c0] + (1) Sinapoyl aldehyde[c0] <=> (2) H+[c0] + (1) NADH[c0] + (1) Sinapate[c0]		R_R07441_c	R07441_c
rxn05143_c0	(1) H2O[c0] + (1) NADP+[c0] + (1) Sinapoyl aldehyde[c0] <=> (2) H+[c0] + (1) NADPH[c0] + (1) Sinapate[c0]	RXN-8014.c	R_R07442_c	R07442_c
rxn05143_m0	(1) H2O[m0] + (1) NADP+[m0] + (1) Sinapoyl aldehyde[m0] <=> (2) H+[m0] + (1) NADPH[m0] + (1) Sinapate[m0]	RXN-8014.c	R_R07442_c	R07442_c
rxn05206_e0	(1) Potassium cation[e0] <=> (1) Potassium cation[c0]	TRANS-RXN-185.ce|TRANS-RXN-186.ce|TRANS-RXN-187.ce|TRANS-RXN-190.ce
rxn05229_c0	(1) ATP[c0] + (1) Aminoimidazole ribotide[c0] + (1) HCO3-[c0] => (1) 1-(5-Phospho-D-ribosyl)-5-amino-4-imidazolecarboxylate[c0] + (1) ADP[c0] + (1) H+[c0] + (1) Orthophosphate[c0]
rxn05231_c0	(1) H2O[c0] + (1) Thioredoxin disulfide[c0] + (1) dADP[c0] <=> (1) ADP[c0] + (1) Thioredoxin[c0]		R_R02017_c	R02017_c
rxn05233_c0	(1) H2O[c0] + (1) Thioredoxin disulfide[c0] + (1) dGDP[c0] <=> (1) GDP[c0] + (1) Thioredoxin[c0]		R_R02019_c	R02019_c
rxn05238_e0	(1) Sulfate[e0] <=> (1) Sulfate[c0]		R_Ex12	Ex12
rxn05266_c0	(1) 2-Demethylmenaquinone[c0] + (1) NADPH[c0] + (1) S-Adenosyl-L-methionine[c0] => (1) Menaquinone[c0] + (1) NADP+[c0] + (1) S-Adenosyl-L-homocysteine[c0]
rxn05287_c0	(1) Geranylgeranyl diphosphate[c0] + (1) Isopentenyl diphosphate[c0] <=> (1) Diphosphate[c0] + (1) H+[c0] + (1) all-trans-Pentaprenyl diphosphate[c0]			R07475_c
rxn05289_c0	(1) NADP+[c0] + (1) Thioredoxin[c0] <=> (1) H+[c0] + (1) NADPH[c0] + (1) Thioredoxin disulfide[c0]		R_R02016_c	R02016_c
rxn05319_e0	(1) H2O[e0] <=> (1) H2O[c0]		R_Ex2	Ex2
rxn05322_c0	(1) Butyryl-[acp][c0] + (1) NAD+[c0] <= (1) But-2-enoyl-[acyl-carrier protein][c0] + (1) H+[c0] + (1) NADH[c0]		R_R04429_c	R04429_c
rxn05323_c0	(1) NAD+[c0] + (1) Tetradecanoyl-[acp][c0] <= (1) H+[c0] + (1) NADH[c0] + (1) trans-Tetradec-2-enoyl-[acp][c0]		R_R04966_c	R04966_c
rxn05324_c0	(1) Dodecanoyl-[acyl-carrier protein][c0] + (1) NAD+[c0] <= (1) H+[c0] + (1) NADH[c0] + (1) trans-Dodec-2-enoyl-[acp][c0]	RXN-9661.c	R_R04724_c	R04724_c
rxn05325_c0	(1) NAD+[c0] + (1) Octanoyl-[acp][c0] <= (1) H+[c0] + (1) NADH[c0] + (1) trans-Oct-2-enoyl-[acp][c0]	RXN-9659.c	R_R04958_c	R04958_c
rxn05326_c0	(1) Hexanoyl-[acp][c0] + (1) NAD+[c0] <= (1) H+[c0] + (1) NADH[c0] + (1) trans-Hex-2-enoyl-[acp][c0]	RXN-9658.c	R_R04955_c	R04955_c
rxn05327_c0	(1) Decanoyl-[acp][c0] + (1) NAD+[c0] <= (1) H+[c0] + (1) NADH[c0] + (1) trans-Dec-2-enoyl-[acp][c0]		R_R04961_c	R04961_c
rxn05328_c0	(1) Hexadecanoyl-[acp][c0] + (1) NAD+[c0] <= (1) H+[c0] + (1) NADH[c0] + (1) trans-Hexadec-2-enoyl-[acp][c0]		R_R04969_c	R04969_c
rxn05329_c0	(1) (3R)-3-Hydroxybutanoyl-[acyl-carrier protein][c0] <=> (1) But-2-enoyl-[acyl-carrier protein][c0] + (1) H2O[c0]		R_R04428_c	R04428_c
rxn05330_c0	(1) (R)-3-Hydroxyhexanoyl-[acp][c0] <=> (1) H2O[c0] + (1) trans-Hex-2-enoyl-[acp][c0]	RXN-9520.c	R_R04954_c	R04954_c
rxn05331_c0	(1) (R)-3-Hydroxydodecanoyl-[acp][c0] <=> (1) H2O[c0] + (1) trans-Dodec-2-enoyl-[acp][c0]	RXN-9533.c	R_R04965_c	R04965_c
rxn05332_c0	(1) (3R)-3-Hydroxypalmitoyl-[acyl-carrier protein][c0] <=> (1) H2O[c0] + (1) trans-Hexadec-2-enoyl-[acp][c0]		R_R04544_c	R04544_c
rxn05333_c0	(1) (3R)-3-Hydroxydecanoyl-[acyl-carrier protein][c0] <=> (1) H2O[c0] + (1) trans-Dec-2-enoyl-[acp][c0]		R_R04535_c	R04535_c
rxn05334_c0	(1) (3R)-3-Hydroxyoctanoyl-[acyl-carrier protein][c0] <=> (1) H2O[c0] + (1) trans-Oct-2-enoyl-[acp][c0]		R_R04537_c	R04537_c
rxn05335_c0	(1) (3R)-3-Hydroxytetradecanoyl-[acyl-carrier protein][c0] <=> (1) H2O[c0] + (1) trans-Tetradec-2-enoyl-[acp][c0]	RXN-9537.c	R_R04568_c	R04568_c
rxn05336_c0	(1) (3R)-3-Hydroxypalmitoyl-[acyl-carrier protein][c0] + (1) NADP+[c0] <=> (1) 3-Oxohexadecanoyl-[acp][c0] + (1) H+[c0] + (1) NADPH[c0]		R_R04543_c	R04543_c
rxn05337_c0	(1) (R)-3-Hydroxyhexanoyl-[acp][c0] + (1) NADP+[c0] <=> (1) 3-Oxohexanoyl-[acp][c0] + (1) H+[c0] + (1) NADPH[c0]	RXN-9518.c	R_R04953_c	R04953_c
rxn05338_c0	(1) (3R)-3-Hydroxydecanoyl-[acyl-carrier protein][c0] + (1) NADP+[c0] <= (1) 3-Oxodecanoyl-[acp][c0] + (1) H+[c0] + (1) NADPH[c0]	RXN-9528.c	R_R04534_c	R04534_c
rxn05339_c0	(1) (3R)-3-Hydroxybutanoyl-[acyl-carrier protein][c0] + (1) NADP+[c0] <=> (1) Acetoacetyl-[acp][c0] + (1) H+[c0] + (1) NADPH[c0]		R_R04533_c	R04533_c
rxn05340_c0	(1) (R)-3-Hydroxydodecanoyl-[acp][c0] + (1) NADP+[c0] <=> (1) 3-Oxododecanoyl-[acp][c0] + (1) H+[c0] + (1) NADPH[c0]	RXN-9532.c	R_R04964_c	R04964_c
rxn05341_c0	(1) (3R)-3-Hydroxyoctanoyl-[acyl-carrier protein][c0] + (1) NADP+[c0] <=> (1) 3-Oxooctanoyl-[acp][c0] + (1) H+[c0] + (1) NADPH[c0]		R_R04536_c	R04536_c
rxn05342_c0	(1) (3R)-3-Hydroxytetradecanoyl-[acyl-carrier protein][c0] + (1) NADP+[c0] <=> (1) 3-Oxotetradecanoyl-[acp][c0] + (1) H+[c0] + (1) NADPH[c0]	RXN-9536.c	R_R04566_c	R04566_c
rxn05343_c0	(1) Malonyl-[acyl-carrier protein][c0] + (1) Octanoyl-[acp][c0] => (1) 3-Oxodecanoyl-[acp][c0] + (1) Acyl-carrier protein[c0] + (1) CO2[c0]	RXN-9527.c	R_R04960_c	R04960_c
rxn05344_c0	(1) Malonyl-[acyl-carrier protein][c0] + (1) Tetradecanoyl-[acp][c0] => (1) 3-Oxohexadecanoyl-[acp][c0] + (1) Acyl-carrier protein[c0] + (1) CO2[c0]		R_R04968_c	R04968_c
rxn05345_c0	(1) Dodecanoyl-[acyl-carrier protein][c0] + (1) Malonyl-[acyl-carrier protein][c0] => (1) 3-Oxotetradecanoyl-[acp][c0] + (1) Acyl-carrier protein[c0] + (1) CO2[c0]	RXN-9535.c	R_R04726_c	R04726_c
rxn05346_c0	(1) Butyryl-[acp][c0] + (1) Malonyl-[acyl-carrier protein][c0] => (1) 3-Oxohexanoyl-[acp][c0] + (1) Acyl-carrier protein[c0] + (1) CO2[c0]	RXN-9516.c	R_R04952_c	R04952_c
rxn05347_c0	(1) Acetyl-[acyl-carrier protein][c0] + (1) Malonyl-[acyl-carrier protein][c0] => (1) Acetoacetyl-[acp][c0] + (1) Acyl-carrier protein[c0] + (1) CO2[c0]	3-OXOACYL-ACP-SYNTH-BASE-RXN.c	R_R04355_c	R04355_c
rxn05348_c0	(1) Decanoyl-[acp][c0] + (1) Malonyl-[acyl-carrier protein][c0] => (1) 3-Oxododecanoyl-[acp][c0] + (1) Acyl-carrier protein[c0] + (1) CO2[c0]	RXN-9531.c	R_R04963_c	R04963_c
rxn05349_c0	(1) Acetyl-CoA[c0] + (1) Acyl-carrier protein[c0] <=> (1) Acetyl-[acyl-carrier protein][c0] + (1) CoA[c0]	ACP-S-ACETYLTRANSFER-RXN.c	R_R01624_c	R01624_c
rxn05350_c0	(1) Hexanoyl-[acp][c0] + (1) Malonyl-[acyl-carrier protein][c0] => (1) 3-Oxooctanoyl-[acp][c0] + (1) Acyl-carrier protein[c0] + (1) CO2[c0]	RXN-9523.c|RXN-9649.c	R_R04957_c	R04957_c
rxn05352_c0	(1) NADP+[c0] + (1) Octanoyl-[acp][c0] <= (1) H+[c0] + (1) NADPH[c0] + (1) trans-Oct-2-enoyl-[acp][c0]	RXN-9526.c
rxn05355_c0	(1) Dodecanoyl-[acyl-carrier protein][c0] + (1) NADP+[c0] <= (1) H+[c0] + (1) NADPH[c0] + (1) trans-Dodec-2-enoyl-[acp][c0]	RXN-9534.c
rxn05357_c0	(1) Hexanoyl-[acp][c0] + (1) NADP+[c0] <= (1) H+[c0] + (1) NADPH[c0] + (1) trans-Hex-2-enoyl-[acp][c0]	RXN-9521.c
rxn05465_c0	(1) Acyl-carrier protein[c0] + (1) H+[c0] + (1) Malonyl-CoA[c0] <=> (1) CoA[c0] + (1) Malonyl-[acyl-carrier protein][c0]	MALONYL-COA-ACP-TRANSACYL-RXN.c	R_R01626_c	R01626_c
rxn05467_e0	(1) CO2[e0] <=> (1) CO2[c0]		R_Ex1	Ex1
rxn05468_e0	(1) Oxygen[e0] <=> (1) Oxygen[c0]		R_Ex3	Ex3
rxn05616_e0	(1) Magnesium cation[e0] <=> (1) Magnesium cation[c0]
rxn05645_e0	(1) H+[e0] + (1) Riboflavin[e0] <= (1) H+[c0] + (1) Riboflavin[c0]
rxn05706_e0	(1) H+[e0] + (1) Histamine[e0] <= (1) H+[c0] + (1) Histamine[c0]
rxn05733_c0	(1) O-Acetyl-L-serine[c0] + (1) Thioredoxin[c0] + (1) Thiosulfate[c0] <=> (1) Acetate[c0] + (1) H+[c0] + (1) L-Cysteine[c0] + (1) Sulfite[c0] + (1) Thioredoxin disulfide[c0]		R_R04859_c	R04859_c
rxn05736_c0	(1) ATP[c0] + (1) CoA[c0] + (1) Tetradecanoic acid[c0] => (1) AMP[c0] + (1) Diphosphate[c0] + (1) H+[c0] + (1) Tetradecanoyl-CoA[c0]	RXN-7904.c.araexp.CPD-7836_TETRADECANOYL-COA
rxn05736_r0	(1) ATP[r0] + (1) CoA[r0] + (1) Tetradecanoic acid[r0] => (1) AMP[r0] + (1) Diphosphate[r0] + (1) H+[r0] + (1) Tetradecanoyl-CoA[r0]	RXN-7904.c.araexp.CPD-7836_TETRADECANOYL-COA
rxn05746_c0	(1) H2O[c0] + (1) Maltotriose[c0] <= (1) D-Glucose[c0] + (1) Maltose[c0]
rxn05792_c0	(1) Acetyl-CoA[c0] + (1) Peptide[c0] => (1) CoA[c0] + (1) Nalpha-Acetylpeptide[c0]
rxn05831_c0	(1) Acetyl-CoA[c0] + (1) Acyl-CoA[c0] <= (1) 3-Oxoacyl-CoA[c0] + (1) CoA[c0]
rxn05871_c0	(1) NAD+[c0] + (1) Primary alcohol[c0] <=> (1) Aldehyde[c0] + (1) H+[c0] + (1) NADH[c0]		R_R00623_c	R00623_c
rxn05873_c0	(1) NADP+[c0] + (1) Primary alcohol[c0] <= (1) Aldehyde[c0] + (1) H+[c0] + (1) NADPH[c0]
rxn05901_c0	(1) Acyl-CoA[c0] + (1) sn-Glycerol 3-phosphate[c0] => (1) 1-Acyl-sn-glycerol 3-phosphate[c0] + (1) CoA[c0] + (2) H+[c0]		R_R00851_c	R00851_c
rxn05901_d0	(1) Acyl-CoA[d0] + (1) sn-Glycerol 3-phosphate[d0] => (1) 1-Acyl-sn-glycerol 3-phosphate[d0] + (1) CoA[d0] + (2) H+[d0]		R_R00851_c	R00851_c
rxn05901_m0	(1) Acyl-CoA[m0] + (1) sn-Glycerol 3-phosphate[m0] => (1) 1-Acyl-sn-glycerol 3-phosphate[m0] + (1) CoA[m0] + (2) H+[m0]		R_R00851_c	R00851_c
rxn05901_r0	(1) Acyl-CoA[r0] + (1) sn-Glycerol 3-phosphate[r0] => (1) 1-Acyl-sn-glycerol 3-phosphate[r0] + (1) CoA[r0] + (2) H+[r0]		R_R00851_c	R00851_c
rxn05912_c0	(1) Dolichyl phosphate[c0] + (1) H2O[c0] => (1) Dolichol[c0] + (2) H+[c0] + (1) Orthophosphate[c0]
rxn05913_c0	(1) Dolichyl diphosphate[c0] + (1) H2O[c0] => (1) Dolichyl phosphate[c0] + (2) H+[c0] + (1) Orthophosphate[c0]		R_R01004_c	R01004_c
rxn05913_d0	(1) Dolichyl diphosphate[d0] + (1) H2O[d0] => (1) Dolichyl phosphate[d0] + (2) H+[d0] + (1) Orthophosphate[d0]		R_R01004_c	R01004_c
rxn05914_c0	(1) Dolichyl phosphate[c0] + (1) UDP-glucose[c0] <=> (1) Dolichyl beta-D-glucosyl phosphate[c0] + (1) UDP[c0]		R_R01005_c	R01005_c
rxn05915_c0	(1) Dolichyl beta-D-glucosyl phosphate[c0] + (1) H2O[c0] => (1) D-Glucose[c0] + (1) Dolichyl phosphate[c0]
rxn05916_c0	(1) Dolichyl phosphate[c0] + (1) UDP-N-acetyl-D-glucosamine[c0] <=> (1) N-Acetyl-D-glucosaminyldiphosphodolichol[c0] + (1) UMP[c0]		R_R05969_c	R05969_c
rxn05918_c0	(1) Dolichyl phosphate[c0] + (1) GDP-mannose[c0] <=> (1) Dolichyl phosphate D-mannose[c0] + (1) GDP[c0]		R_R01009_c	R01009_c
rxn05920_c0	(1) CTP[c0] + (1) Dolichol[c0] + (1) H+[c0] <=> (1) CDP[c0] + (1) Dolichyl phosphate[c0]
rxn05952_c0	(1) Glutathione[c0] + (1) H+[c0] + (1) L-Amino acid[c0] <=> (1) (5-L-Glutamyl)-L-amino acid[c0] + (1) Cys-Gly[c0]		R_R01262_c	R01262_c
rxn05952_v0	(1) Glutathione[v0] + (1) H+[v0] + (1) L-Amino acid[v0] <=> (1) (5-L-Glutamyl)-L-amino acid[v0] + (1) Cys-Gly[v0]		R_R01262_c	R01262_c
rxn05957_c0	(1) Hydrogen sulfide[c0] + (1) O-Succinyl-L-homoserine[c0] <=> (1) L-Homocysteine[c0] + (1) Succinate[c0]		R_R01288_c
rxn05957_m0	(1) Hydrogen sulfide[m0] + (1) O-Succinyl-L-homoserine[m0] <=> (1) L-Homocysteine[m0] + (1) Succinate[m0]		R_R01288_c
rxn05957_r0	(1) Hydrogen sulfide[r0] + (1) O-Succinyl-L-homoserine[r0] <=> (1) L-Homocysteine[r0] + (1) Succinate[r0]		R_R01288_c
rxn05963_c0	(1) H+[c0] + (1) H2O[c0] + (1) Phosphatidylcholine[c0] <=> (1) Choline[c0] + (1) Phosphatidate[c0]		R_R01310_c	R01310_c
rxn05963_v0	(1) H+[v0] + (1) H2O[v0] + (1) Phosphatidylcholine[v0] <=> (1) Choline[v0] + (1) Phosphatidate[v0]		R_R01310_c	R01310_c
rxn05964_c0	(1) H2O[c0] + (1) Phosphatidylcholine[c0] => (1) 1,2-Diacyl-sn-glycerol[c0] + (1) Choline phosphate[c0] + (1) H+[c0]
rxn06002_c0	(1) Acyl-CoA[c0] + (1) Cholesterol[c0] => (1) Cholesterol ester[c0] + (1) CoA[c0] + (4) H+[c0]
rxn06009_c0	(1) Aromatic aldehyde[c0] + (1) H2O[c0] + (1) Oxygen[c0] => (1) Benzoate[c0] + (1) H+[c0] + (1) Hydrogen peroxide[c0]	RXN-8088.c
rxn06012_c0	(1) Acyl-CoA[c0] + (1) Sphingosine[c0] <= (1) CoA[c0] + (5) H+[c0] + (1) N-Acylsphingosine[c0]
rxn06025_c0	(1) (5-L-Glutamyl)-peptide[c0] + (1) Taurine[c0] <=> (1) 5-L-Glutamyl-taurine[c0] + (1) H+[c0] + (1) Peptide[c0]		R_R01687_c	R01687_c
rxn06025_v0	(1) (5-L-Glutamyl)-peptide[v0] + (1) Taurine[v0] <=> (1) 5-L-Glutamyl-taurine[v0] + (1) H+[v0] + (1) Peptide[v0]		R_R01687_c	R01687_c
rxn06033_c0	(1) H2O[c0] + (1) Hexadecanoyl-[acp][c0] => (1) Acyl-carrier protein[c0] + (1) H+[c0] + (1) Hexadecanoic acid[c0]		R_R01706_c	R01706_c
rxn06037_c0	(1) (3S)-3-Hydroxyacyl-CoA[c0] + (1) NAD+[c0] <=> (1) 3-Oxoacyl-CoA[c0] + (1) H+[c0] + (1) NADH[c0]
rxn06037_r0	(1) (3S)-3-Hydroxyacyl-CoA[r0] + (1) NAD+[r0] <=> (1) 3-Oxoacyl-CoA[r0] + (1) H+[r0] + (1) NADH[r0]
rxn06038_c0	(1) (3R)-3-Hydroxyacyl-CoA[c0] + (1) NADP+[c0] <= (1) 3-Oxoacyl-CoA[c0] + (1) H+[c0] + (1) NADPH[c0]
rxn06043_c0	(1) CTP[c0] + (1) Phosphatidate[c0] <=> (1) CDP-diacylglycerol[c0] + (1) Diphosphate[c0]		R_R01799_c	R01799_c
rxn06045_c0	(1) CDP-diacylglycerol[c0] + (1) sn-Glycerol 3-phosphate[c0] <=> (1) CMP[c0] + (1) Phosphatidylglycerophosphate[c0]		R_R01801_c	R01801_c
rxn06045_d0	(1) CDP-diacylglycerol[d0] + (1) sn-Glycerol 3-phosphate[d0] <=> (1) CMP[d0] + (1) Phosphatidylglycerophosphate[d0]		R_R01801_c	R01801_c
rxn06045_m0	(1) CDP-diacylglycerol[m0] + (1) sn-Glycerol 3-phosphate[m0] <=> (1) CMP[m0] + (1) Phosphatidylglycerophosphate[m0]		R_R01801_c	R01801_c
rxn06046_c0	(1) CDP-diacylglycerol[c0] + (1) myo-Inositol[c0] => (1) 1-Phosphatidyl-D-myo-inositol[c0] + (1) CMP[c0] + (2) H+[c0]		R_R01802_c	R01802_c
rxn06074_c0	(1) Geranyl diphosphate[c0] => (1) Diphosphate[c0] + (1) H+[c0] + (1) Pinene[c0]	4.2.3.14-RXN.c
rxn06076_c0	(1) H2O[c0] + (1) Thioredoxin disulfide[c0] + (1) dCDP[c0] <=> (1) CDP[c0] + (1) Thioredoxin[c0]		R_R02024_c	R02024_c
rxn06079_c0	(1) H2O[c0] + (1) Phosphatidylglycerol[c0] => (1) 1,2-Diacyl-sn-glycerol[c0] + (2) H+[c0] + (1) sn-Glycerol 3-phosphate[c0]			R02027_c
rxn06086_c0	(1) H+[c0] + (1) H2O[c0] + (1) Phosphatidylethanolamine[c0] => (1) Ethanolamine[c0] + (1) Phosphatidate[c0]		R_R02051_c	R02051_c
rxn06086_v0	(1) H+[v0] + (1) H2O[v0] + (1) Phosphatidylethanolamine[v0] => (1) Ethanolamine[v0] + (1) Phosphatidate[v0]		R_R02051_c	R02051_c
rxn06087_c0	(1) H2O[c0] + (1) Phosphatidylethanolamine[c0] => (1) 1,2-Diacyl-sn-glycerol[c0] + (1) Ethanolamine phosphate[c0] + (1) H+[c0]
rxn06090_c0	(1) Phosphatidylserine[c0] => (1) CO2[c0] + (1) Phosphatidylethanolamine[c0]		R_R02055_c	R02055_c
rxn06092_c0	(1) 1,2-Diacyl-sn-glycerol[c0] + (1) CDP-ethanolamine[c0] <=> (1) CMP[c0] + (1) H+[c0] + (1) Phosphatidylethanolamine[c0]		R_R02057_c	R02057_c
rxn06094_c0	(1) H2O[c0] + (1) Starch[c0] <= (1) Amylose[c0] + (1) alpha-D-Glucose[c0]
rxn06096_c0	(1) Orthophosphate[c0] + (1) Starch[c0] => (1) Amylose[c0] + (1) D-Glucose 1-phosphate[c0]
rxn06108_c0	(1) NAD+[c0] + (1) Ubiquinol[c0] <= (1) H+[c0] + (1) NADH[c0] + (1) Ubiquinone[c0]
rxn06108_m0	(1) NAD+[m0] + (1) Ubiquinol[m0] <= (1) H+[m0] + (1) NADH[m0] + (1) Ubiquinone[m0]
rxn06109_c0	(1) Succinate[c0] + (1) Ubiquinone[c0] <=> (1) Fumarate[c0] + (1) Ubiquinol[c0]
rxn06135_c0	(3) H+[c0] + (1) Malonyl-CoA[c0] + (2) NADH[c0] + (1) Stearoyl-CoA[c0] <=> (1) CO2[c0] + (1) CoA[c0] + (1) Eicosanoyl-CoA[c0] + (1) H2O[c0] + (2) NAD+[c0]	ICOSANOYL-COA-SYNTHASE-RXN.c.araexp.CPD-9965_NAD_NADH
rxn06135_x0	(3) H+[x0] + (1) Malonyl-CoA[x0] + (2) NADH[x0] + (1) Stearoyl-CoA[x0] <=> (1) CO2[x0] + (1) CoA[x0] + (1) Eicosanoyl-CoA[x0] + (1) H2O[x0] + (2) NAD+[x0]	ICOSANOYL-COA-SYNTHASE-RXN.c.araexp.CPD-9965_NAD_NADH
rxn06136_c0	(3) H+[c0] + (1) Malonyl-CoA[c0] + (2) NADPH[c0] + (1) Stearoyl-CoA[c0] => (1) CO2[c0] + (1) CoA[c0] + (1) Eicosanoyl-CoA[c0] + (1) H2O[c0] + (2) NADP+[c0]	ICOSANOYL-COA-SYNTHASE-RXN.c.araexp.CPD-9965_NADP_NADPH
rxn06136_x0	(3) H+[x0] + (1) Malonyl-CoA[x0] + (2) NADPH[x0] + (1) Stearoyl-CoA[x0] => (1) CO2[x0] + (1) CoA[x0] + (1) Eicosanoyl-CoA[x0] + (1) H2O[x0] + (2) NADP+[x0]	ICOSANOYL-COA-SYNTHASE-RXN.c.araexp.CPD-9965_NADP_NADPH
rxn06138_c0	(1) H2O[c0] + (1) Phosphatidate[c0] => (1) 1,2-Diacyl-sn-glycerol[c0] + (2) H+[c0] + (1) Orthophosphate[c0]		R_R02239_c	R02239_c
rxn06138_n0	(1) H2O[n0] + (1) Phosphatidate[n0] => (1) 1,2-Diacyl-sn-glycerol[n0] + (2) H+[n0] + (1) Orthophosphate[n0]		R_R02239_c	R02239_c
rxn06139_c0	(1) 1,2-Diacyl-sn-glycerol[c0] + (1) ATP[c0] + (1) H+[c0] <=> (1) ADP[c0] + (1) Phosphatidate[c0]		R_R02240_c	R02240_c
rxn06142_c0	(1) 3'-Phosphopolynucleotide[c0] + (1) H2O[c0] => (2) H+[c0] + (1) Orthophosphate[c0] + (1) Polynucleotide[c0]
rxn06143_c0	(1) 5'-Phosphopolynucleotide[c0] + (1) H2O[c0] => (2) H+[c0] + (1) Orthophosphate[c0] + (1) Polynucleotide[c0]
rxn06160_c0	(1) Acyl-CoA[c0] + (1) Retinol[c0] => (1) CoA[c0] + (4) H+[c0] + (1) Retinyl ester[c0]
rxn06160_r0	(1) Acyl-CoA[r0] + (1) Retinol[r0] => (1) CoA[r0] + (4) H+[r0] + (1) Retinyl ester[r0]
rxn06181_c0	(1) ATP[c0] + (1) H+[c0] + (1) Protein tyrosine[c0] <=> (1) ADP[c0] + (1) Protein tyrosine phosphate[c0]			R02584_c
rxn06181_n0	(1) ATP[n0] + (1) H+[n0] + (1) Protein tyrosine[n0] <=> (1) ADP[n0] + (1) Protein tyrosine phosphate[n0]			R02584_c
rxn06181_r0	(1) ATP[r0] + (1) H+[r0] + (1) Protein tyrosine[r0] <=> (1) ADP[r0] + (1) Protein tyrosine phosphate[r0]			R02584_c
rxn06181_w0	(1) ATP[w0] + (1) H+[w0] + (1) Protein tyrosine[w0] <=> (1) ADP[w0] + (1) Protein tyrosine phosphate[w0]			R02584_c
rxn06182_c0	(1) H2O[c0] + (1) Protein tyrosine phosphate[c0] => (2) H+[c0] + (1) Orthophosphate[c0] + (1) Protein tyrosine[c0]
rxn06182_d0	(1) H2O[d0] + (1) Protein tyrosine phosphate[d0] => (2) H+[d0] + (1) Orthophosphate[d0] + (1) Protein tyrosine[d0]
rxn06213_c0	(1) 3-Hydroxyanthranilate[c0] + (1) S-Adenosyl-L-methionine[c0] <=> (1) 3-Methoxyanthranilate[c0] + (1) H+[c0] + (1) S-Adenosyl-L-homocysteine[c0]
rxn06216_c0	(1) (3S)-3-Hydroxyacyl-CoA[c0] <=> (1) H2O[c0] + (1) trans-2,3-Dehydroacyl-CoA[c0]
rxn06216_r0	(1) (3S)-3-Hydroxyacyl-CoA[r0] <=> (1) H2O[r0] + (1) trans-2,3-Dehydroacyl-CoA[r0]
rxn06220_c0	(1) 1,2-Diacyl-sn-glycerol[c0] + (1) UDP-D-galactose[c0] <=> (1) 1,2-Diacyl-3-beta-D-galactosyl-sn-glycerol[c0] + (1) UDP[c0]		R_R02691_c	R02691_c
rxn06220_d0	(1) 1,2-Diacyl-sn-glycerol[d0] + (1) UDP-D-galactose[d0] <=> (1) 1,2-Diacyl-3-beta-D-galactosyl-sn-glycerol[d0] + (1) UDP[d0]		R_R02691_c	R02691_c
rxn06236_c0	(1) (3R)-3-Hydroxyacyl-[acyl-carrier protein][c0] + (1) NAD+[c0] <= (1) 3-Oxoacyl-[acyl-carrier protein][c0] + (1) H+[c0] + (1) NADH[c0]
rxn06237_c0	(1) (3R)-3-Hydroxyacyl-[acyl-carrier protein][c0] + (1) NADP+[c0] <=> (1) 3-Oxoacyl-[acyl-carrier protein][c0] + (1) H+[c0] + (1) NADPH[c0]	3-OXOACYL-ACP-REDUCT-RXN.c|RXN-9517.c
rxn06250_c0	(1) Cyanohydrin[c0] <=> (1) Cyanide[c0] + (1) Ketone[c0]		R_R02811_c
rxn06251_c0	(1) H2O[c0] + (1) Oleoyl-[acyl-carrier protein][c0] => (1) (9Z)-Octadecenoic acid[c0] + (1) Acyl-carrier protein[c0] + (1) H+[c0]
rxn06251_d0	(1) H2O[d0] + (1) Oleoyl-[acyl-carrier protein][d0] => (1) (9Z)-Octadecenoic acid[d0] + (1) Acyl-carrier protein[d0] + (1) H+[d0]
rxn06298_c0	(1) tRNA uridine[c0] => (1) tRNA pseudouridine[c0]
rxn06306_c0	(1) UTP[c0] + (1) beta-L-Arabinose 1-phosphate[c0] <=> (1) Diphosphate[c0] + (1) UDP-L-arabinose[c0]			R03077_c
rxn06317_c0	(1) Dihydrokaempferol[c0] + (2) H+[c0] + (2) NADPH[c0] + (2) Oxygen[c0] => (1) Dihydromyricetin[c0] + (2) H2O[c0] + (2) NADP+[c0]	RXN-7782.c
rxn06325_c0	(1) ATP[c0] + (1) H+[c0] + (1) Myosin light chain[c0] => (1) ADP[c0] + (1) Myosin light chain phosphate[c0]
rxn06326_c0	(1) H2O[c0] + (1) Myosin light chain phosphate[c0] => (2) H+[c0] + (1) Myosin light chain[c0] + (1) Orthophosphate[c0]	MYOSIN-LIGHT-CHAIN-PHOSPHATASE-RXN.c
rxn06326_n0	(1) H2O[n0] + (1) Myosin light chain phosphate[n0] => (2) H+[n0] + (1) Myosin light chain[n0] + (1) Orthophosphate[n0]	MYOSIN-LIGHT-CHAIN-PHOSPHATASE-RXN.c
rxn06328_c0	(1) H2O[c0] + (1) alpha-L-Fucoside[c0] => (1) 6-Deoxy-L-galactose[c0] + (1) Alcohol[c0]
rxn06335_c0	(1) (S)-2-Methylbutanoyl-CoA[c0] + (1) Enzyme N6-(dihydrolipoyl)lysine[c0] <=> (1) CoA[c0] + (1) [Dihydrolipoyllysine-residue (2-methylpropanoyl)transferase] S-(2-methylbutanoyl)dihydrolipoyllysine[c0]
rxn06335_m0	(1) (S)-2-Methylbutanoyl-CoA[m0] + (1) Enzyme N6-(dihydrolipoyl)lysine[m0] <=> (1) CoA[m0] + (1) [Dihydrolipoyllysine-residue (2-methylpropanoyl)transferase] S-(2-methylbutanoyl)dihydrolipoyllysine[m0]
rxn06362_c0	(1) 1-Phosphatidyl-D-myo-inositol[c0] + (1) H2O[c0] => (1) 1,2-Diacyl-sn-glycerol[c0] + (2) H+[c0] + (1) Inositol 1-phosphate[c0]
rxn06365_c0	(1) 1-Phosphatidyl-D-myo-inositol[c0] + (1) ATP[c0] + (1) H+[c0] <=> (1) 1-Phosphatidyl-1D-myo-inositol 4-phosphate[c0] + (1) ADP[c0]		R_R03361_c	R03361_c
rxn06365_n0	(1) 1-Phosphatidyl-D-myo-inositol[n0] + (1) ATP[n0] + (1) H+[n0] <=> (1) 1-Phosphatidyl-1D-myo-inositol 4-phosphate[n0] + (1) ADP[n0]		R_R03361_c	R03361_c
rxn06365_w0	(1) 1-Phosphatidyl-D-myo-inositol[w0] + (1) ATP[w0] + (1) H+[w0] <=> (1) 1-Phosphatidyl-1D-myo-inositol 4-phosphate[w0] + (1) ADP[w0]		R_R03361_c	R03361_c
rxn06366_c0	(1) 1-Phosphatidyl-D-myo-inositol[c0] + (1) ATP[c0] + (1) H+[c0] <=> (1) 1-Phosphatidyl-1D-myo-inositol 3-phosphate[c0] + (1) ADP[c0]		R_R03362_c	R03362_c
rxn06373_c0	(1) Phospholipid olefinic fatty acid[c0] + (1) S-Adenosyl-L-methionine[c0] => (1) H+[c0] + (1) Phospholipid cyclopropane fatty acid[c0] + (1) S-Adenosyl-L-homocysteine[c0]
rxn06377_c0	(1) Glycine[c0] + (1) Lipoylprotein[c0] <=> (1) CO2[c0] + (1) S-Aminomethyldihydrolipoylprotein[c0]
rxn06378_c0	(1) 1-Phosphatidyl-D-myo-inositol 4,5-bisphosphate[c0] + (1) H2O[c0] => (1) 1,2-Diacyl-sn-glycerol[c0] + (1) D-myo-Inositol 1,4,5-trisphosphate[c0] + (6) H+[c0]
rxn06378_w0	(1) 1-Phosphatidyl-D-myo-inositol 4,5-bisphosphate[w0] + (1) H2O[w0] => (1) 1,2-Diacyl-sn-glycerol[w0] + (1) D-myo-Inositol 1,4,5-trisphosphate[w0] + (6) H+[w0]
rxn06389_c0	(1) 1-Phosphatidyl-1D-myo-inositol 4-phosphate[c0] + (1) ATP[c0] + (1) H+[c0] <=> (1) 1-Phosphatidyl-D-myo-inositol 4,5-bisphosphate[c0] + (1) ADP[c0]		R_R03469_c	R03469_c
rxn06389_g0	(1) 1-Phosphatidyl-1D-myo-inositol 4-phosphate[g0] + (1) ATP[g0] + (1) H+[g0] <=> (1) 1-Phosphatidyl-D-myo-inositol 4,5-bisphosphate[g0] + (1) ADP[g0]		R_R03469_c	R03469_c
rxn06389_w0	(1) 1-Phosphatidyl-1D-myo-inositol 4-phosphate[w0] + (1) ATP[w0] + (1) H+[w0] <=> (1) 1-Phosphatidyl-D-myo-inositol 4,5-bisphosphate[w0] + (1) ADP[w0]		R_R03469_c	R03469_c
rxn06402_c0	(1) ROH[c0] + (1) UDP-glucose[c0] => (1) D-Glucoside[c0] + (1) UDP[c0]
rxn06403_c0	(1) D-Glucoside[c0] + (1) H2O[c0] => (1) ROH[c0] + (1) alpha-D-Glucose[c0]		R_R03527_c	R03527_c
rxn06403_r0	(1) D-Glucoside[r0] + (1) H2O[r0] => (1) ROH[r0] + (1) alpha-D-Glucose[r0]		R_R03527_c	R03527_c
rxn06465_c0	(1) Desmosterol[c0] + (1) S-Adenosyl-L-methionine[c0] => (1) 24-Methylenecholesterol[c0] + (1) H+[c0] + (1) S-Adenosyl-L-homocysteine[c0]
rxn06472_c0	(1) (5-L-Glutamyl)-L-amino acid[c0] => (1) H+[c0] + (1) L-Amino acid[c0] + (1) Pidolic acid[c0]
rxn06493_c0	(1) Dihydrolipoylprotein[c0] + (1) NAD+[c0] <=> (1) H+[c0] + (1) Lipoylprotein[c0] + (1) NADH[c0]		R_R03815_c	R03815_c
rxn06493_d0	(1) Dihydrolipoylprotein[d0] + (1) NAD+[d0] <=> (1) H+[d0] + (1) Lipoylprotein[d0] + (1) NADH[d0]		R_R03815_c	R03815_c
rxn06493_n0	(1) Dihydrolipoylprotein[n0] + (1) NAD+[n0] <=> (1) H+[n0] + (1) Lipoylprotein[n0] + (1) NADH[n0]		R_R03815_c	R03815_c
rxn06499_c0	(1) (5')ppPur-mRNA[c0] + (1) GTP[c0] <=> (1) Diphosphate[c0] + (1) G(5')pppR-RNA[c0]
rxn06503_c0	(1) 5'-Dephospho-DNA[c0] + (1) ATP[c0] + (1) H+[c0] <=> (1) 5'-Phospho-DNA[c0] + (1) ADP[c0]
rxn06510_c0	(1) Acetyl-CoA[c0] + (1) Lauroyl-CoA[c0] <=> (1) 3-Oxotetradecanoyl-CoA[c0] + (1) CoA[c0]
rxn06515_c0	(1) Protein lysine[c0] + (1) S-Adenosyl-L-methionine[c0] => (1) H+[c0] + (1) Protein N6-methyl-L-lysine[c0] + (1) S-Adenosyl-L-homocysteine[c0]
rxn06515_n0	(1) Protein lysine[n0] + (1) S-Adenosyl-L-methionine[n0] => (1) H+[n0] + (1) Protein N6-methyl-L-lysine[n0] + (1) S-Adenosyl-L-homocysteine[n0]
rxn06537_c0	(1) Histone-L-lysine[c0] + (1) S-Adenosyl-L-methionine[c0] => (1) H+[c0] + (1) Histone N6-methyl-L-lysine[c0] + (1) S-Adenosyl-L-homocysteine[c0]	HISTONE-LYSINE-N-METHYLTRANSFERASE-RXN.c
rxn06537_d0	(1) Histone-L-lysine[d0] + (1) S-Adenosyl-L-methionine[d0] => (1) H+[d0] + (1) Histone N6-methyl-L-lysine[d0] + (1) S-Adenosyl-L-homocysteine[d0]	HISTONE-LYSINE-N-METHYLTRANSFERASE-RXN.c
rxn06538_c0	(1) 10-Formyltetrahydrofolate[c0] + (1) L-Methionyl-tRNA[c0] => (1) N-Formylmethionyl-tRNA[c0] + (1) Tetrahydrofolate[c0]		R_R03940_c	R03940_c
[truncated: 4,400 more rows]

## Sheet: Evidenced Arabidopsis Model
ModelSEED ID	Reaction Defintion	AraCyc	AraGEM	iRS1597	Mintz-Oron et al.
rxn00001_c0	(1) Diphosphate[c0] + (1) H2O[c0] <=> (1) H+[c0] + (2) Orthophosphate[c0]	INORGPYROPHOSPHAT-RXN.c	R_R00004_c	R00004_c
rxn00001_w0	(1) Diphosphate[w0] + (1) H2O[w0] <=> (1) H+[w0] + (2) Orthophosphate[w0]	INORGPYROPHOSPHAT-RXN.c	R_R00004_c	R00004_c
rxn00006_c0	(2) Hydrogen peroxide[c0] => (2) H2O[c0] + (1) Oxygen[c0]	CATAL-RXN.c
rxn00011_c0	(1) H+[c0] + (1) Pyruvate[c0] + (1) Thiamin diphosphate[c0] <=> (1) 2-(alpha-Hydroxyethyl)thiamine diphosphate[c0] + (1) CO2[c0]	RXN-12583.c	R_R00014_c	R00014_c
rxn00024_c0	(2) L-Tyrosine[c0] + (1) Oxygen[c0] <= (2) 3,4-Dihydroxy-L-phenylalanine[c0]
rxn00029_c0	(2) 5-Aminolevulinate[c0] => (1) H+[c0] + (2) H2O[c0] + (1) Porphobilinogen[c0]	PORPHOBILSYNTH-RXN.c	R_R00036_c	R00036_c
rxn00048_c0	(2) 6,7-Dimethyl-8-(D-ribityl)lumazine[c0] + (1) H+[c0] => (1) 5-Amino-6-(1-D-ribitylamino)uracil[c0] + (1) Riboflavin[c0]	RIBOFLAVIN-SYN-RXN.c	R_R00066_c	R00066_c
rxn00055_c0	(3) S-Adenosyl-L-methionine[c0] => (3) 5'-Methylthioadenosine[c0] + (3) H+[c0] + (1) Nicotianamine[c0]	2.5.1.43-RXN.c		R00075_c
rxn00056_c0	(4) Fe2+[c0] + (4) H+[c0] + (1) Oxygen[c0] => (4) Fe3+[c0] + (2) H2O[c0]	RXN0-1483.c
rxn00060_c0	(1) H2O[c0] + (4) Porphobilinogen[c0] => (1) Hydroxymethylbilane[c0] + (4) NH3[c0]	OHMETHYLBILANESYN-RXN.c	R_R00084_c	R00084_c
rxn00062_c0	(1) ATP[c0] + (1) H2O[c0] => (1) ADP[c0] + (1) H+[c0] + (1) Orthophosphate[c0]	3.6.4.3-RXN.c|3.6.4.4-RXN.c|3.6.4.5-RXN.c|3.6.4.6-RXN.c|ADENOSINETRIPHOSPHATASE-RXN.c|NUCLEOSIDE-TRIPHOSPHATASE-RXN.c.araexp.ADP_ATP|RXN-11109.c|RXN-11135.c|RXN0-1061.c	R_R00086_c|R_R01719_c	R00086_c|R01719_c
rxn00068_c0	(2) Fe2+[c0] + (1) H+[c0] + (1) NAD+[c0] <= (2) Fe3+[c0] + (1) NADH[c0]	FERRIC-CHELATE-REDUCTASE-RXN.c
rxn00069_c0	(2) L-Glutamate[c0] + (1) NAD+[c0] <=> (1) 2-Oxoglutarate[c0] + (1) H+[c0] + (1) L-Glutamine[c0] + (1) NADH[c0]	GLUTAMATE-SYNTHASE-NADH-RXN.c
rxn00076_c0	(1) H2O[c0] + (1) NAD+[c0] => (1) AMP[c0] + (2) H+[c0] + (1) Nicotinamide D-ribonucleotide[c0]	NADPYROPHOSPHAT-RXN.c	R_R00103_c	R00103_c
rxn00077_c0	(1) ATP[c0] + (1) NAD+[c0] <=> (1) ADP[c0] + (1) H+[c0] + (1) NADP+[c0]	NAD-KIN-RXN.c
rxn00078_c0	(1) ATP[c0] + (1) NADH[c0] => (1) ADP[c0] + (1) H+[c0] + (1) NADPH[c0]	NADH-KINASE-RXN.c
rxn00078_x0	(1) ATP[x0] + (1) NADH[x0] => (1) ADP[x0] + (1) H+[x0] + (1) NADPH[x0]	NADH-KINASE-RXN.c
rxn00086_c0	(2) Glutathione[c0] + (1) NADP+[c0] <=> (1) Glutathione disulfide[c0] + (1) H+[c0] + (1) NADPH[c0]	GLUTATHIONE-REDUCT-NADPH-RXN.c	R_R00115_c	R00115_c
rxn00092_c0	(1) ADP[c0] + (1) H2O[c0] => (1) AMP[c0] + (2) H+[c0] + (1) Orthophosphate[c0]	NUCLEOSIDE-DIPHOSPHATASE-RXN.c.araexp.ADP_AMP|RXN-10862.c	R_R00122_c	R00122_c
rxn00097_c0	(1) AMP[c0] + (1) ATP[c0] + (1) H+[c0] <=> (2) ADP[c0]	RXN4FS-19.c	R_R00127_c	R00127_c
rxn00100_c0	(1) ATP[c0] + (1) Dephospho-CoA[c0] => (1) ADP[c0] + (1) CoA[c0] + (1) H+[c0]	DEPHOSPHOCOAKIN-RXN.c	R_R00130_c	R00130_c
rxn00101_c0	(2) H+[c0] + (1) H2O[c0] + (1) Urea[c0] => (1) CO2[c0] + (2) NH3[c0]	UREASE-RXN.c	R_R00131_c	R00131_c
rxn00102_c0	(1) H+[c0] + (1) HCO3-[c0] <=> (1) CO2[c0] + (1) H2O[c0]	CARBODEHYDRAT-RXN.c|RXN0-5224.c	R_R00132N_c	R00132N_c
rxn00105_c0	(1) ATP[c0] + (1) Nicotinamide D-ribonucleotide[c0] <=> (1) Diphosphate[c0] + (1) NAD+[c0]	2.7.7.1-RXN.c
rxn00113_c0	(2) ATP[c0] + (1) CO2[c0] + (1) H2O[c0] + (1) NH3[c0] => (2) ADP[c0] + (1) Carbamoyl phosphate[c0] + (3) H+[c0] + (1) Orthophosphate[c0]	6.3.4.16-RXN.c	R_R00149_c	R00149_c
rxn00116_c0	(1) H2O[c0] + (1) UDP[c0] => (2) H+[c0] + (1) Orthophosphate[c0] + (1) UMP[c0]	NUCLEOSIDE-DIPHOSPHATASE-RXN.c.araexp.UDP_UMP|RXN-12197.c	R_R00155_c	R00155_c
rxn00116_g0	(1) H2O[g0] + (1) UDP[g0] => (2) H+[g0] + (1) Orthophosphate[g0] + (1) UMP[g0]	NUCLEOSIDE-DIPHOSPHATASE-RXN.c.araexp.UDP_UMP|RXN-12197.c	R_R00155_c	R00155_c
rxn00117_c0	(1) ATP[c0] + (1) UDP[c0] <=> (1) ADP[c0] + (1) UTP[c0]	NUCLEOSIDE-DIP-KIN-RXN.c.araexp.UDP_UTP|UDPKIN-RXN.c	R_R00156_c	R00156_c
rxn00117_x0	(1) ATP[x0] + (1) UDP[x0] <=> (1) ADP[x0] + (1) UTP[x0]	NUCLEOSIDE-DIP-KIN-RXN.c.araexp.UDP_UTP|UDPKIN-RXN.c	R_R00156_c	R00156_c
rxn00119_c0	(1) ATP[c0] + (1) H+[c0] + (1) UMP[c0] <=> (1) ADP[c0] + (1) UDP[c0]	2.7.4.22-RXN.c|RXN-12002.c|UMPKI-RXN.c	R_R00158_c	R00158_c
rxn00120_c0	(1) H2O[c0] + (1) UTP[c0] => (1) H+[c0] + (1) Orthophosphate[c0] + (1) UDP[c0]	NUCLEOSIDE-TRIPHOSPHATASE-RXN.c.araexp.UDP_UTP|RXN-12196.c	R_R00159_c	R00159_c
rxn00120_g0	(1) H2O[g0] + (1) UTP[g0] => (1) H+[g0] + (1) Orthophosphate[g0] + (1) UDP[g0]	NUCLEOSIDE-TRIPHOSPHATASE-RXN.c.araexp.UDP_UTP|RXN-12196.c	R_R00159_c	R00159_c
rxn00121_c0	(1) FAD[c0] + (1) H2O[c0] => (1) AMP[c0] + (1) FMN[c0] + (2) H+[c0]	FAD-PYROPHOSPHATASE-RXN.c
rxn00122_c0	(1) ATP[c0] + (1) FMN[c0] <=> (1) Diphosphate[c0] + (1) FAD[c0]	FADSYN-RXN.c
rxn00124_c0	(1) ATP[c0] + (1) Pyridoxal[c0] <=> (1) ADP[c0] + (1) H+[c0] + (1) Pyridoxal phosphate[c0]	PYRIDOXKIN-RXN.c	R_R00174_c	R00174_c
rxn00126_c0	(1) Diphosphate[c0] + (1) H+[c0] + (1) Orthophosphate[c0] + (1) S-Adenosyl-L-methionine[c0] <= (1) ATP[c0] + (1) H2O[c0] + (1) L-Methionine[c0]	S-ADENMETSYN-RXN.c	R_R00177_c	R00177_c
rxn00126_n0	(1) Diphosphate[n0] + (1) H+[n0] + (1) Orthophosphate[n0] + (1) S-Adenosyl-L-methionine[n0] <= (1) ATP[n0] + (1) H2O[n0] + (1) L-Methionine[n0]	S-ADENMETSYN-RXN.c	R_R00177_c	R00177_c
rxn00127_c0	(1) H+[c0] + (1) S-Adenosyl-L-methionine[c0] => (1) CO2[c0] + (1) S-Adenosylmethioninamine[c0]	SAMDECARB-RXN.c	R_R00178_c	R00178_c
rxn00128_c0	(1) S-Adenosyl-L-methionine[c0] <=> (1) 1-Aminocyclopropane-1-carboxylate[c0] + (1) 5'-Methylthioadenosine[c0] + (1) H+[c0]	4.4.1.14-RXN.c	R_R00179_c	R00179_c
rxn00130_c0	(1) AMP[c0] + (1) H+[c0] + (1) H2O[c0] => (1) IMP[c0] + (1) NH3[c0]	AMP-DEAMINASE-RXN.c	R_R00181_c	R00181_c
rxn00134_c0	(1) ATP[c0] + (1) Adenosine[c0] => (1) ADP[c0] + (1) AMP[c0] + (1) H+[c0]	ADENOSINE-KINASE-RXN.c	R_R00185_c	R00185_c
rxn00137_c0	(1) Adenosine 3',5'-bisphosphate[c0] + (1) H2O[c0] <=> (1) AMP[c0] + (1) Orthophosphate[c0]	325-BISPHOSPHATE-NUCLEOTIDASE-RXN.c
rxn00137_m0	(1) Adenosine 3',5'-bisphosphate[m0] + (1) H2O[m0] <=> (1) AMP[m0] + (1) Orthophosphate[m0]	325-BISPHOSPHATE-NUCLEOTIDASE-RXN.c
rxn00138_c0	(1) ATP[c0] + (1) Deamino-NAD+[c0] + (1) NH3[c0] => (1) AMP[c0] + (1) Diphosphate[c0] + (2) H+[c0] + (1) NAD+[c0]	NAD-SYNTH-NH3-RXN.c
rxn00139_c0	(1) AMP[c0] + (1) Diphosphate[c0] + (1) H+[c0] <= (1) 5-Phospho-alpha-D-ribose 1-diphosphate[c0] + (1) Adenine[c0]	ADENPRIBOSYLTRAN-RXN.c	R_R00190_c	R00190_c
rxn00141_c0	(1) H2O[c0] + (1) S-Adenosyl-L-homocysteine[c0] <=> (1) Adenosine[c0] + (1) L-Homocysteine[c0]	ADENOSYLHOMOCYSTEINASE-RXN.c	R_R00192_c	R00192_c
rxn00148_c0	(1) ATP[c0] + (1) Pyruvate[c0] <=> (1) ADP[c0] + (1) H+[c0] + (1) Phosphoenolpyruvate[c0]	PEPDEPHOS-RXN.c	R_R00200_c	R00200_c
rxn00151_c0	(1) ATP[c0] + (1) Orthophosphate[c0] + (1) Pyruvate[c0] => (1) AMP[c0] + (1) Diphosphate[c0] + (2) H+[c0] + (1) Phosphoenolpyruvate[c0]	PYRUVATEORTHOPHOSPHATE-DIKINASE-RXN.c
rxn00153_c0	(1) H2O[c0] + (1) Phosphoenolpyruvate[c0] => (1) Orthophosphate[c0] + (1) Pyruvate[c0]	PHOSPHOENOLPYRUVATE-PHOSPHATASE-RXN.c
rxn00159_c0	(1) (S)-Malate[c0] + (1) NAD+[c0] => (1) CO2[c0] + (1) NADH[c0] + (1) Pyruvate[c0]	MALIC-NAD-RXN.c	R_R00214_c	R00214_c
rxn00161_c0	(1) (S)-Malate[c0] + (1) NADP+[c0] => (1) CO2[c0] + (1) NADPH[c0] + (1) Pyruvate[c0]	MALIC-NADP-RXN.c		R00216_c
rxn00166_c0	(1) D-Serine[c0] => (1) NH3[c0] + (1) Pyruvate[c0]	DSERDEAM-RXN.c
rxn00168_c0	(1) H+[c0] + (1) Pyruvate[c0] => (1) Acetaldehyde[c0] + (1) CO2[c0]	RXN-6161.c
rxn00178_c0	(2) Acetyl-CoA[c0] <=> (1) Acetoacetyl-CoA[c0] + (1) CoA[c0]	ACETYL-COA-ACETYLTRANSFER-RXN.c	R_R00238_c	R00238_c
rxn00179_c0	(1) ATP[c0] + (1) L-Glutamate[c0] <=> (1) ADP[c0] + (1) L-Glutamyl 5-phosphate[c0]	GLUTKIN-RXN.c	R_R00239_c	R00239_c
rxn00182_c0	(1) H2O[c0] + (1) L-Glutamate[c0] + (1) NAD+[c0] <=> (1) 2-Oxoglutarate[c0] + (1) H+[c0] + (1) NADH[c0] + (1) NH3[c0]	GLUTAMATE-DEHYDROGENASE-NADP+-RXN.c.araexp.NAD_NADH|GLUTAMATE-DEHYDROGENASE-RXN.c	R_R00243_c	R00243_c
rxn00184_c0	(1) H2O[c0] + (1) L-Glutamate[c0] + (1) NADP+[c0] <=> (1) 2-Oxoglutarate[c0] + (1) H+[c0] + (1) NADPH[c0] + (1) NH3[c0]	GLUTAMATE-DEHYDROGENASE-NADP+-RXN.c.araexp.NADP_NADPH|GLUTDEHYD-RXN.c
rxn00186_c0	(1) ATP[c0] + (2) H2O[c0] + (1) Pidolic acid[c0] => (1) ADP[c0] + (1) H+[c0] + (1) L-Glutamate[c0] + (1) Orthophosphate[c0]	5-OXOPROLINASE-ATP-HYDROLYSING-RXN.c	R_R00251_c	R00251_c
rxn00187_c0	(1) ATP[c0] + (1) L-Glutamate[c0] + (1) NH3[c0] => (1) ADP[c0] + (1) H+[c0] + (1) L-Glutamine[c0] + (1) Orthophosphate[c0]	GLUTAMINESYN-RXN.c	R_R00253_c	R00253_c
rxn00189_c0	(1) H2O[c0] + (1) L-Glutamine[c0] => (1) L-Glutamate[c0] + (1) NH3[c0]	GLUTAMIN-RXN.c
rxn00190_c0	(1) ATP[c0] + (1) Deamino-NAD+[c0] + (1) H2O[c0] + (1) L-Glutamine[c0] => (1) AMP[c0] + (1) Diphosphate[c0] + (2) H+[c0] + (1) L-Glutamate[c0] + (1) NAD+[c0]	NAD-SYNTH-GLN-RXN.c	R_R00257_c	R00257_c
rxn00191_c0	(1) 2-Oxoglutarate[c0] + (1) L-Alanine[c0] <=> (1) L-Glutamate[c0] + (1) Pyruvate[c0]	ALANINE-AMINOTRANSFERASE-RXN.c|RXN-13698.c	R_R00258_c	R00258_c
rxn00192_c0	(1) Acetyl-CoA[c0] + (1) L-Glutamate[c0] <=> (1) CoA[c0] + (1) H+[c0] + (1) N-Acetyl-L-glutamate[c0]	N-ACETYLTRANSFER-RXN.c	R_R00259_c	R00259_c
rxn00194_c0	(1) H+[c0] + (1) L-Glutamate[c0] => (1) 4-Aminobutanoate[c0] + (1) CO2[c0]	GLUTDECARBOX-RXN.c	R_R00261_c	R00261_c
rxn00205_c0	(2) Glutathione[c0] + (1) Hydrogen peroxide[c0] => (1) Glutathione disulfide[c0] + (2) H2O[c0]	GLUTATHIONE-PEROXIDASE-RXN.c		R00274_c
rxn00206_c0	(2) H+[c0] + (2) O2.-[c0] => (1) Hydrogen peroxide[c0] + (1) Oxygen[c0]	SUPEROX-DISMUT-RXN.c
rxn00208_c0	(1) H2O[c0] + (1) Oxygen[c0] + (1) Pyridoxamine phosphate[c0] <=> (1) Hydrogen peroxide[c0] + (1) NH3[c0] + (1) Pyridoxal phosphate[c0]	PMPOXI-RXN.c
rxn00209_c0	(1) Oxygen[c0] + (1) Pyridoxine phosphate[c0] => (1) Hydrogen peroxide[c0] + (1) Pyridoxal phosphate[c0]	PNPOXI-RXN.c
rxn00211_c0	(1) H2O[c0] + (2) NAD+[c0] + (1) UDP-glucose[c0] <=> (3) H+[c0] + (2) NADH[c0] + (1) UDP-glucuronate[c0]	UGD-RXN.c.araexp.CPD-12575	R_R00286_c	R00286_c
rxn00213_c0	(1) D-Glucose 1-phosphate[c0] + (1) UTP[c0] <=> (1) Diphosphate[c0] + (1) UDP-glucose[c0]	GLUC1PURIDYLTRANS-RXN.c.araexp.CPD-12575|RXN-11505.c.araexp.CPD-12575_GLC-1-P	R_R00289_c	R00289_c
rxn00215_c0	(1) UDP-glucose[c0] <=> (1) H2O[c0] + (1) UDP-4-dehydro-6-deoxy-D-glucose[c0]	UDP-GLUCOSE-46-DEHYDRATASE-RXN.c.araexp.CPD-12575		R00293_c
rxn00224_c0	(1) Fe2+[c0] + (1) Protoporphyrin[c0] <=> (2) H+[c0] + (1) Heme[c0]	PROTOHEMEFERROCHELAT-RXN.c	R_R00310_c	R00310_c
rxn00237_c0	(1) ATP[c0] + (1) GDP[c0] <=> (1) ADP[c0] + (1) GTP[c0]	GDPKIN-RXN.c|NUCLEOSIDE-DIP-KIN-RXN.c.araexp.GDP_GTP	R_R00330_c	R00330_c
rxn00237_x0	(1) ATP[x0] + (1) GDP[x0] <=> (1) ADP[x0] + (1) GTP[x0]	GDPKIN-RXN.c|NUCLEOSIDE-DIP-KIN-RXN.c.araexp.GDP_GTP	R_R00330_c	R00330_c
rxn00239_c0	(1) ATP[c0] + (1) GMP[c0] + (1) H+[c0] <=> (1) ADP[c0] + (1) GDP[c0]	GUANYL-KIN-RXN.c	R_R00332_c	R00332_c
rxn00241_c0	(1) GTP[c0] + (1) H2O[c0] => (1) GDP[c0] + (1) H+[c0] + (1) Orthophosphate[c0]	3.6.5.5-RXN.c|NUCLEOSIDE-TRIPHOSPHATASE-RXN.c.araexp.GDP_GTP|RXN0-1021.c|RXN0-5462.c	R_R00335_c	R00335_c
rxn00241_g0	(1) GTP[g0] + (1) H2O[g0] => (1) GDP[g0] + (1) H+[g0] + (1) Orthophosphate[g0]	3.6.5.5-RXN.c|NUCLEOSIDE-TRIPHOSPHATASE-RXN.c.araexp.GDP_GTP|RXN0-1021.c|RXN0-5462.c	R_R00335_c	R00335_c
rxn00247_c0	(1) ATP[c0] + (1) Oxaloacetate[c0] => (1) ADP[c0] + (1) CO2[c0] + (1) Phosphoenolpyruvate[c0]	PEPCARBOXYKIN-RXN.c	R_R00341_c	R00341_c
rxn00247_n0	(1) ATP[n0] + (1) Oxaloacetate[n0] => (1) ADP[n0] + (1) CO2[n0] + (1) Phosphoenolpyruvate[n0]	PEPCARBOXYKIN-RXN.c	R_R00341_c	R00341_c
rxn00248_c0	(1) (S)-Malate[c0] + (1) NAD+[c0] <=> (1) H+[c0] + (1) NADH[c0] + (1) Oxaloacetate[c0]		R_R00342_c	R00342_c
rxn00257_c0	(1) ATP[c0] + (1) Citrate[c0] + (1) CoA[c0] <=> (1) ADP[c0] + (1) Acetyl-CoA[c0] + (1) Orthophosphate[c0] + (1) Oxaloacetate[c0]	ATP-CITRATE-PRO-S--LYASE-RXN.c	R_R00352_c	R00352_c
rxn00260_c0	(1) 2-Oxoglutarate[c0] + (1) L-Aspartate[c0] <=> (1) L-Glutamate[c0] + (1) Oxaloacetate[c0]	ASPAMINOTRANS-RXN.c|RXN-13697.c	R_R00355_c	R00355_c
rxn00270_c0	(1) Glycine[c0] + (1) S-Adenosyl-L-methionine[c0] => (1) H+[c0] + (1) S-Adenosyl-L-homocysteine[c0] + (1) Sarcosine[c0]
rxn00285_c0	(1) ATP[c0] + (1) CoA[c0] + (1) Succinate[c0] <=> (1) ADP[c0] + (1) Orthophosphate[c0] + (1) Succinyl-CoA[c0]	SUCCCOASYN-RXN.c
rxn00293_c0	(1) N-Acetyl-alpha-D-glucosamine 1-phosphate[c0] + (1) UTP[c0] <=> (1) Diphosphate[c0] + (1) UDP-N-acetyl-D-glucosamine[c0]	2.7.7.64-RXN.c.araexp.N-ACETYL-D-GLUCOSAMINE-1-P_UDP-N-ACETYL-D-GLUCOSAMINE|NAG1P-URIDYLTRANS-RXN.c	R_R00416_c	R00416_c
rxn00299_c0	(1) GTP[c0] + (1) H2O[c0] => (1) 7,8-Dihydroneopterin 3'-triphosphate[c0] + (1) Formate[c0] + (1) H+[c0]	GTP-CYCLOHYDRO-I-RXN.c
rxn00300_c0	(1) GTP[c0] + (3) H2O[c0] => (1) 2,5-Diamino-6-(5-phospho-D-ribosylamino)pyrimidin-4(3H)-one[c0] + (1) Diphosphate[c0] + (1) Formate[c0] + (3) H+[c0]	GTP-CYCLOHYDRO-II-RXN.c	R_R00425_c	R00425_c
rxn00303_c0	(1) ATP[c0] + (1) GTP[c0] => (1) AMP[c0] + (1) Guanosine 3'-diphosphate 5'-triphosphate[c0] + (2) H+[c0]	GTPPYPHOSKIN-RXN.c	R_R00429_c	R00429_c
rxn00313_c0	(1) H+[c0] + (1) meso-2,6-Diaminoheptanedioate[c0] <=> (1) CO2[c0] + (1) L-Lysine[c0]	DIAMINOPIMDECARB-RXN.c	R_R00451_c	R00451_c
rxn00322_c0	(1) H+[c0] + (1) L-Lysine[c0] => (1) CO2[c0] + (1) Cadaverine[c0]	LYSDECARBOX-RXN.c
rxn00324_c0	(1) Glycolate[c0] + (1) NADP+[c0] <=> (1) Glyoxylate[c0] + (1) H+[c0] + (1) NADPH[c0]	GLYOXYLATE-REDUCTASE-NADP+-RXN.c
rxn00330_c0	(1) (S)-Malate[c0] + (1) CoA[c0] + (1) H+[c0] <= (1) Acetyl-CoA[c0] + (1) Glyoxylate[c0] + (1) H2O[c0]	MALSYN-RXN.c
rxn00333_c0	(1) Glycolate[c0] + (1) Oxygen[c0] => (1) Glyoxylate[c0] + (1) Hydrogen peroxide[c0]	RXN-969.c
rxn00337_c0	(1) ATP[c0] + (1) L-Aspartate[c0] <=> (1) 4-Phospho-L-aspartate[c0] + (1) ADP[c0]	ASPARTATEKIN-RXN.c	R_R00480_c	R00480_c
rxn00338_c0	(1) L-Aspartate[c0] + (1) Oxygen[c0] => (1) H+[c0] + (1) Hydrogen peroxide[c0] + (1) Iminoaspartate[c0]	L-ASPARTATE-OXID-RXN.c	R_R00481_c	R00481_c
rxn00342_c0	(1) H2O[c0] + (1) L-Asparagine[c0] => (1) L-Aspartate[c0] + (1) NH3[c0]	ASPARAGHYD-RXN.c	R_R00485_c	R00485_c
rxn00343_c0	(1) 3-Cyano-L-alanine[c0] + (2) H2O[c0] => (1) L-Aspartate[c0] + (1) NH3[c0]	3.5.5.4-RXN.c
rxn00351_c0	(1) ATP[c0] + (1) Glycine[c0] + (1) gamma-L-Glutamyl-L-cysteine[c0] <=> (1) ADP[c0] + (1) Glutathione[c0] + (1) H+[c0] + (1) Orthophosphate[c0]	GLUTATHIONE-SYN-RXN.c	R_R00497_c	R00497_c
rxn00355_c0	(1) UTP[c0] + (1) alpha-D-Galactose 1-phosphate[c0] <=> (1) Diphosphate[c0] + (1) UDP-D-galactose[c0]	UTPHEXPURIDYLYLTRANS-RXN.c	R_R00502_c	R00502_c
rxn00361_c0	(1) ATP[c0] + (1) Adenylyl sulfate[c0] => (1) 3'-Phosphoadenylyl sulfate[c0] + (1) ADP[c0] + (1) H+[c0]	ADENYLYLSULFKIN-RXN.c	R_R00509_c	R00509_c
rxn00364_c0	(1) ATP[c0] + (1) CMP[c0] + (1) H+[c0] <=> (1) ADP[c0] + (1) CDP[c0]	CMPKI-RXN.c|RXN-11832.c	R_R00512_c	R00512_c
rxn00366_c0	(1) CDP[c0] + (1) H2O[c0] => (1) CMP[c0] + (2) H+[c0] + (1) Orthophosphate[c0]	NUCLEOSIDE-DIPHOSPHATASE-RXN.c.araexp.CDP_CMP|RXN-12198.c	R_R00514_c	R00514_c
rxn00366_g0	(1) CDP[g0] + (1) H2O[g0] => (1) CMP[g0] + (2) H+[g0] + (1) Orthophosphate[g0]	NUCLEOSIDE-DIPHOSPHATASE-RXN.c.araexp.CDP_CMP|RXN-12198.c	R_R00514_c	R00514_c
rxn00377_c0	(1) H2O[c0] + (1) S-Formylglutathione[c0] => (1) Formate[c0] + (1) Glutathione[c0] + (1) H+[c0]	S-FORMYLGLUTATHIONE-HYDROLASE-RXN.c
rxn00379_c0	(1) ATP[c0] + (1) Sulfate[c0] => (1) Adenylyl sulfate[c0] + (1) Diphosphate[c0]		R_R00529_c	R00529_c
rxn00383_c0	(1) H2O[c0] + (1) Oxygen[c0] + (1) Sulfite[c0] <=> (1) H+[c0] + (1) Hydrogen peroxide[c0] + (1) Sulfate[c0]	SULFITE-OXIDASE-RXN.c	R_R00533_c	R00533_c
rxn00392_c0	(1) ATP[c0] + (1) Riboflavin[c0] => (1) ADP[c0] + (1) FMN[c0] + (1) H+[c0]	RIBOFLAVINKIN-RXN.c	R_R00549_c	R00549_c
rxn00394_c0	(1) H2O[c0] + (1) L-Arginine[c0] => (1) L-Ornithine[c0] + (1) Urea[c0]	ARGINASE-RXN.c	R_R00551_c	R00551_c
rxn00401_c0	(1) L-Arginine[c0] + (1) Oxygen[c0] => (1) 4-Guanidinobutanamide[c0] + (1) CO2[c0] + (1) H2O[c0]	ARGININE-2-MONOOXYGENASE-RXN.c
rxn00405_c0	(1) H+[c0] + (1) L-Arginine[c0] => (1) Agmatine[c0] + (1) CO2[c0]	ARGDECARBOX-RXN.c	R_R00566_c	R00566_c
rxn00408_c0	(1) CTP[c0] + (1) H2O[c0] => (1) CDP[c0] + (1) H+[c0] + (1) Orthophosphate[c0]	NUCLEOSIDE-TRIPHOSPHATASE-RXN.c.araexp.CDP_CTP|RXN-12195.c	R_R00569_c	R00569_c
rxn00408_g0	(1) CTP[g0] + (1) H2O[g0] => (1) CDP[g0] + (1) H+[g0] + (1) Orthophosphate[g0]	NUCLEOSIDE-TRIPHOSPHATASE-RXN.c.araexp.CDP_CTP|RXN-12195.c	R_R00569_c	R00569_c
rxn00409_c0	(1) ATP[c0] + (1) CDP[c0] <=> (1) ADP[c0] + (1) CTP[c0]	CDPKIN-RXN.c|NUCLEOSIDE-DIP-KIN-RXN.c.araexp.CDP_CTP	R_R00570_c	R00570_c
rxn00409_x0	(1) ATP[x0] + (1) CDP[x0] <=> (1) ADP[x0] + (1) CTP[x0]	CDPKIN-RXN.c|NUCLEOSIDE-DIP-KIN-RXN.c.araexp.CDP_CTP	R_R00570_c	R00570_c
rxn00412_c0	(1) ATP[c0] + (1) H2O[c0] + (1) L-Glutamine[c0] + (1) UTP[c0] => (1) ADP[c0] + (1) CTP[c0] + (2) H+[c0] + (1) L-Glutamate[c0] + (1) Orthophosphate[c0]	CTPSYN-RXN.c	R_R00573_c	R00573_c
rxn00414_c0	(2) ATP[c0] + (1) H2O[c0] + (1) HCO3-[c0] + (1) L-Glutamine[c0] => (2) ADP[c0] + (1) Carbamoyl phosphate[c0] + (2) H+[c0] + (1) L-Glutamate[c0] + (1) Orthophosphate[c0]	CARBPSYN-RXN.c	R_R00575_c	R00575_c
rxn00416_c0	(1) ATP[c0] + (1) H2O[c0] + (1) L-Aspartate[c0] + (1) L-Glutamine[c0] => (1) AMP[c0] + (1) Diphosphate[c0] + (2) H+[c0] + (1) L-Asparagine[c0] + (1) L-Glutamate[c0]	ASNSYNB-RXN.c	R_R00578_c	R00578_c
rxn00420_c0	(1) H2O[c0] + (1) O-Phospho-L-serine[c0] <=> (1) L-Serine[c0] + (1) Orthophosphate[c0]	PSERPHOSPHA-RXN.c.araexp.3-P-SERINE_SER|RXN0-5114.c	R_R00582_c	R00582_c
rxn00423_c0	(1) Acetyl-CoA[c0] + (1) L-Serine[c0] => (1) CoA[c0] + (1) O-Acetyl-L-serine[c0]	SERINE-O-ACETTRAN-RXN.c	R_R00586_c	R00586_c
rxn00425_c0	(1) L-Serine[c0] <=> (1) D-Serine[c0]	5.1.1.18-RXN.c		R00589_c
rxn00426_c0	(1) L-Serine[c0] => (1) Dehydroalanine[c0] + (1) H2O[c0]
rxn00433_c0	(1) H2O[c0] + (1) Oxygen[c0] + (1) Sarcosine[c0] => (1) Formaldehyde[c0] + (1) Glycine[c0] + (1) Hydrogen peroxide[c0]	SARCOX-RXN.c	R_R00610_c	R00610_c
rxn00440_c0	(1) ATP[c0] + (1) Thiamine[c0] => (1) AMP[c0] + (1) H+[c0] + (1) Thiamin diphosphate[c0]	THIAMIN-PYROPHOSPHOKINASE-RXN.c	R_R00619_c	R00619_c
rxn00444_c0	(1) Ascorbate[c0] + (1) Hydrogen peroxide[c0] => (1) Dehydroascorbate[c0] + (2) H2O[c0]	L-ASCORBATE-PEROXIDASE-RXN.c|RXN-12440.c		R00644_c
rxn00445_c0	(1) L-Galactono-1,4-lactone[c0] + (1) Oxygen[c0] => (1) Ascorbate[c0] + (1) H+[c0] + (1) Hydrogen peroxide[c0]
rxn00451_c0	(1) L-Methionine[c0] + (1) S-Adenosyl-L-methionine[c0] <=> (1) S-Adenosyl-L-homocysteine[c0] + (1) S-Methyl-L-methionine[c0]	METHIONINE-S-METHYLTRANSFERASE-RXN.c		R00649_c
rxn00452_c0	(1) L-Homocysteine[c0] + (1) S-Adenosyl-L-methionine[c0] => (1) H+[c0] + (1) L-Methionine[c0] + (1) S-Adenosyl-L-homocysteine[c0]	HOMOCYSTEINE-S-METHYLTRANSFERASE-RXN.c	R_R00650_c	R00650_c
rxn00454_c0	(1) Glyoxylate[c0] + (1) L-Methionine[c0] <=> (1) 4-Methylthio-2-oxobutanoic acid[c0] + (1) Glycine[c0]	R15-RXN.c.araexp.GLY_GLYOX
rxn00456_c0	(1) H2O[c0] + (1) L-Methionine[c0] <=> (1) 2-Oxobutanoate[c0] + (1) Methanethiol[c0] + (1) NH3[c0]	METHIONINE-GAMMA-LYASE-RXN.c
rxn00459_c0	(1) 2-Phospho-D-glycerate[c0] <=> (1) H2O[c0] + (1) Phosphoenolpyruvate[c0]	2PGADEHYDRAT-RXN.c	R_R00658_c	R00658_c
rxn00469_c0	(1) H2O[c0] + (1) N-Acetylornithine[c0] <=> (1) Acetate[c0] + (1) L-Ornithine[c0]	ACETYLORNDEACET-RXN.c	R_R00669_c	R00669_c
rxn00483_c0	(1) 2-Oxoglutarate[c0] + (1) L-Tryptophan[c0] <=> (1) Indolepyruvate[c0] + (1) L-Glutamate[c0]	TRYPTOPHAN-AMINOTRANSFERASE-RXN.c
rxn00491_c0	(1) L-Phenylalanine[c0] + (1) Pyruvate[c0] <=> (1) L-Alanine[c0] + (1) Phenylpyruvate[c0]	2.6.1.58-RXN.c
rxn00493_c0	(1) 2-Oxoglutarate[c0] + (1) L-Phenylalanine[c0] <=> (1) L-Glutamate[c0] + (1) Phenylpyruvate[c0]	PHEAMINOTRANS-RXN.c|RXN-10814.c	R_R00694_c	R00694_c
rxn00495_c0	(1) L-Phenylalanine[c0] => (1) NH3[c0] + (1) trans-Cinnamate[c0]	PHENYLALANINE-AMMONIA-LYASE-RXN.c	R_R00697_c	R00697_c
rxn00498_c0	(2) trans,trans-Farnesyl diphosphate[c0] <=> (1) Diphosphate[c0] + (1) H+[c0] + (1) Presqualene diphosphate[c0]	2.5.1.21-RXN.c|RXN-12263.c	R_R00702_c	R00702_c
rxn00499_c0	(1) (S)-Lactate[c0] + (1) NAD+[c0] <=> (1) H+[c0] + (1) NADH[c0] + (1) Pyruvate[c0]	L-LACTATE-DEHYDROGENASE-RXN.c	R_R00703_c	R00703_c
rxn00503_c0	(1) (S)-1-Pyrroline-5-carboxylate[c0] + (2) H2O[c0] + (1) NAD+[c0] => (1) H+[c0] + (1) L-Glutamate[c0] + (1) NADH[c0]
rxn00506_c0	(1) Acetaldehyde[c0] + (1) H2O[c0] + (1) NAD+[c0] => (1) Acetate[c0] + (2) H+[c0] + (1) NADH[c0]	RXN66-3.c	R_R00710_c	R00710_c
rxn00508_c0	(1) H2O[c0] + (1) NAD+[c0] + (1) Succinate semialdehyde[c0] <=> (2) H+[c0] + (1) NADH[c0] + (1) Succinate[c0]	SUCCINATE-SEMIALDEHYDE-DEHYDROGENASE-RXN.c	R_R00713_c	R00713_c
rxn00510_c0	(1) H2O[c0] + (1) N6-(L-1,3-Dicarboxypropyl)-L-lysine[c0] + (1) NAD+[c0] <=> (1) 2-Oxoglutarate[c0] + (1) H+[c0] + (1) L-Lysine[c0] + (1) NADH[c0]	1.5.1.7-RXN.c	R_R00715_c	R00715_c
rxn00511_c0	(1) H2O[c0] + (1) N6-(L-1,3-Dicarboxypropyl)-L-lysine[c0] + (1) NADP+[c0] <=> (1) 2-Oxoglutarate[c0] + (1) H+[c0] + (1) L-Lysine[c0] + (1) NADPH[c0]	1.5.1.8-RXN.c	R_R00716_c	R00716_c
rxn00527_c0	(1) 2-Oxoglutarate[c0] + (1) L-Tyrosine[c0] <=> (1) 3-(4-Hydroxyphenyl)pyruvate[c0] + (1) L-Glutamate[c0]	2.6.1.57-RXN.c.araexp.P-HYDROXY-PHENYLPYRUVATE_TYR|TYRAMINOTRANS-RXN.c|TYROSINE-AMINOTRANSFERASE-RXN.c	R_R00734_c	R00734_c
rxn00529_c0	(1) H+[c0] + (1) L-Tyrosine[c0] => (1) CO2[c0] + (1) Tyramine[c0]	TYROSINE-DECARBOXYLASE-RXN.c	R_R00736_c	R00736_c
rxn00533_c0	(1) ATP[c0] + (1) Acetyl-CoA[c0] + (1) HCO3-[c0] <=> (1) ADP[c0] + (1) H+[c0] + (1) Malonyl-CoA[c0] + (1) Orthophosphate[c0]		R_R00742_c	R00742_c
rxn00541_c0	(1) L-Threonine[c0] <=> (1) Acetaldehyde[c0] + (1) Glycine[c0]	THREONINE-ALDOLASE-RXN.c
rxn00543_c0	(1) Ethanol[c0] + (1) NAD+[c0] <=> (1) Acetaldehyde[c0] + (1) H+[c0] + (1) NADH[c0]	ALCOHOL-DEHYDROG-RXN.c	R_R00754_c	R00754_c
rxn00543_w0	(1) Ethanol[w0] + (1) NAD+[w0] <=> (1) Acetaldehyde[w0] + (1) H+[w0] + (1) NADH[w0]	ALCOHOL-DEHYDROG-RXN.c	R_R00754_c	R00754_c
rxn00550_c0	(1) H2O[c0] + (1) beta-D-Fructose 2,6-bisphosphate[c0] <= (1) D-Fructose 6-phosphate[c0] + (1) Orthophosphate[c0]			R00763_c
rxn00571_c0	(1) H2O[c0] + (1) NAD+[c0] + (1) Nitrite[c0] <= (1) H+[c0] + (1) NADH[c0] + (1) Nitrate[c0]	NITRATE-REDUCTASE-NADH-RXN.c|NITRATE-REDUCTASE-NADPORNOPH-RXN.c.araexp.NAD_NADH	R_R00794_c	R00794_c
rxn00578_c0	(1) H2O[c0] + (1) Sucrose 6'-phosphate[c0] <=> (1) Orthophosphate[c0] + (1) Sucrose[c0]	SUCROSE-PHOSPHATASE-RXN.c	R_R00805_c	R00805_c
rxn00610_c0	(1) H2O[c0] + (1) sn-Glycerol 3-phosphate[c0] => (1) Glycerol[c0] + (1) Orthophosphate[c0]
rxn00615_c0	(1) ATP[c0] + (1) Glycerol[c0] => (1) ADP[c0] + (1) H+[c0] + (1) sn-Glycerol 3-phosphate[c0]	GLYCEROL-KIN-RXN.c	R_R00847_c	R00847_c
rxn00640_c0	(1) D-Mannose 1-phosphate[c0] + (1) GDP[c0] <= (1) GDP-mannose[c0] + (1) Orthophosphate[c0]	MANNPGUANYLTRANGDP-RXN.c	R_R00883_c	R00883_c
rxn00641_c0	(1) D-Mannose 1-phosphate[c0] + (1) GTP[c0] <=> (1) Diphosphate[c0] + (1) GDP-mannose[c0]	2.7.7.13-RXN.c
rxn00642_c0	(1) GDP-mannose[c0] => (1) GDP-4-dehydro-6-deoxy-D-mannose[c0] + (1) H2O[c0]	GDPMANDEHYDRA-RXN.c	R_R00888_c	R00888_c
rxn00643_c0	(1) GDP-mannose[c0] <=> (1) GDP-L-galactose[c0]	RXN-1882.c	R_R00889_c	R00889_c
rxn00649_c0	(1) Hydrogen sulfide[c0] + (1) O-Acetyl-L-serine[c0] <=> (1) Acetate[c0] + (1) L-Cysteine[c0]	ACSERLY-RXN.c	R_R00897_c	R00897_c
rxn00654_c0	(1) 3-Ureidopropionate[c0] + (2) H+[c0] + (1) H2O[c0] => (1) CO2[c0] + (1) NH3[c0] + (1) beta-Alanine[c0]	BETA-UREIDOPROPIONASE-RXN.c	R_R00905_c	R00905_c
rxn00656_c0	(1) 3-Oxopropanoate[c0] + (1) L-Alanine[c0] <=> (1) Pyruvate[c0] + (1) beta-Alanine[c0]	2.6.1.18-RXN.c
rxn00686_c0	(1) NADP+[c0] + (1) Tetrahydrofolate[c0] <=> (1) Dihydrofolate[c0] + (1) H+[c0] + (1) NADPH[c0]	DIHYDROFOLATEREDUCT-RXN.c		R00939_c
rxn00689_c0	(1) ATP[c0] + (1) L-Glutamate[c0] + (1) Tetrahydrofolate[c0] => (1) ADP[c0] + (1) H+[c0] + (1) Orthophosphate[c0] + (1) Tetrahydrofolyl-[Glu](2)[c0]	RXN-6102.c	R_R00942_c	R00942_c
rxn00690_c0	(1) ATP[c0] + (1) Formate[c0] + (1) Tetrahydrofolate[c0] <=> (1) 10-Formyltetrahydrofolate[c0] + (1) ADP[c0] + (1) Orthophosphate[c0]	FORMATETHFLIG-RXN.c	R_R00943_c	R00943_c
rxn00692_c0	(1) L-Serine[c0] + (1) Tetrahydrofolate[c0] <=> (1) 5,10-Methylenetetrahydrofolate[c0] + (1) Glycine[c0] + (1) H2O[c0]		R_R00945_c	R00945_c
rxn00693_c0	(1) 5-Methyltetrahydrofolate[c0] + (1) L-Homocysteine[c0] <=> (1) L-Methionine[c0] + (1) Tetrahydrofolate[c0]	HOMOCYSMETB12-RXN.c	R_R00946_c	R00946_c
rxn00695_c0	(1) ATP[c0] + (1) D-Glucose 1-phosphate[c0] => (1) ADP-glucose[c0] + (1) Diphosphate[c0]		R_R00948_c	R00948_c
rxn00697_c0	(1) ADP-glucose[c0] + (1) H2O[c0] => (1) AMP[c0] + (1) D-Glucose 1-phosphate[c0] + (2) H+[c0]	ADPSUGPPHOSPHAT-RXN.c.araexp.ADP-D-GLUCOSE_GLC-1-P|RXN-10770.c	R_R00951_c	R00951_c
rxn00704_c0	(1) D-Glucose 1-phosphate[c0] <=> (1) alpha-D-Glucose 6-phosphate[c0]	PHOSPHOGLUCMUT-RXN.c	R_R00959_c	R00959_c
rxn00710_c0	(1) H+[c0] + (1) Orotidine 5'-phosphate[c0] => (1) CO2[c0] + (1) UMP[c0]	OROTPDECARB-RXN.c	R_R00965_c	R00965_c
rxn00711_c0	(1) Diphosphate[c0] + (1) H+[c0] + (1) UMP[c0] <=> (1) 5-Phospho-alpha-D-ribose 1-diphosphate[c0] + (1) Uracil[c0]	URACIL-PRIBOSYLTRANS-RXN.c	R_R00966_c	R00966_c
rxn00713_c0	(1) GTP[c0] + (1) Uridine[c0] => (1) GDP[c0] + (1) H+[c0] + (1) UMP[c0]	URKI-RXN.c	R_R00968_c	R00968_c
rxn00720_c0	(1) 5,6-Dihydrouracil[c0] + (1) NADP+[c0] <= (1) H+[c0] + (1) NADPH[c0] + (1) Uracil[c0]		R_R00978_c	R00978_c
rxn00727_c0	(1) Chorismate[c0] + (1) L-Glutamine[c0] => (1) Anthranilate[c0] + (1) H+[c0] + (1) L-Glutamate[c0] + (1) Pyruvate[c0]		R_R00986_c	R00986_c
rxn00737_c0	(1) L-Threonine[c0] => (1) 2-Oxobutanoate[c0] + (1) NH3[c0]	THREDEHYD-RXN.c	R_R00996_c	R00996_c
rxn00747_c0	(1) D-Glyceraldehyde 3-phosphate[c0] <=> (1) Glycerone phosphate[c0]		R_R01015_c	R01015_c
rxn00751_c0	(1) ATP[c0] + (1) Choline[c0] => (1) ADP[c0] + (1) Choline phosphate[c0] + (1) H+[c0]	CHOLINE-KINASE-RXN.c	R_R01021_c	R01021_c
rxn00770_c0	(1) ATP[c0] + (1) D-Ribose 5-phosphate[c0] => (1) 5-Phospho-alpha-D-ribose 1-diphosphate[c0] + (1) AMP[c0] + (1) H+[c0]	PRPPSYN-RXN.c	R_R01049_c	R01049_c
rxn00773_c0	(1) ADP[c0] + (1) D-Ribose 5-phosphate[c0] <= (1) ADP-ribose[c0] + (1) Orthophosphate[c0]	2.7.7.35-RXN.c
rxn00776_c0	(1) D-Ribose 5-phosphate[c0] + (1) Uracil[c0] <=> (1) H2O[c0] + (1) Pseudouridine 5'-phosphate[c0]	PSEUDOURIDYLATE-SYNTHASE-RXN.c|RXN0-5398.c	R_R01055_c	R01055_c
rxn00777_c0	(1) D-Ribose 5-phosphate[c0] <=> (1) D-Ribulose 5-phosphate[c0]	RIB5PISOM-RXN.c	R_R01056_c	R01056_c
rxn00779_c0	(1) D-Glyceraldehyde 3-phosphate[c0] + (1) H2O[c0] + (1) NADP+[c0] <=> (1) 3-Phospho-D-glycerate[c0] + (2) H+[c0] + (1) NADPH[c0]	1.2.1.9-RXN.c
rxn00781_c0	(1) D-Glyceraldehyde 3-phosphate[c0] + (1) NAD+[c0] + (1) Orthophosphate[c0] <=> (1) 3-Phospho-D-glyceroyl phosphate[c0] + (1) H+[c0] + (1) NADH[c0]		R_R01061_c	R01061_c
rxn00789_c0	(1) 1-(5-Phospho-D-ribosyl)-ATP[c0] + (1) Diphosphate[c0] + (1) H+[c0] <= (1) 5-Phospho-alpha-D-ribose 1-diphosphate[c0] + (1) ATP[c0]	ATPPHOSPHORIBOSYLTRANS-RXN.c|RXN-10968.c	R_R01071_c	R01071_c
rxn00790_c0	(1) 5-Phosphoribosylamine[c0] + (1) Diphosphate[c0] + (1) H+[c0] + (1) L-Glutamate[c0] <= (1) 5-Phospho-alpha-D-ribose 1-diphosphate[c0] + (1) H2O[c0] + (1) L-Glutamine[c0]	PRPPAMIDOTRANS-RXN.c	R_R01072_c	R01072_c
rxn00791_c0	(1) Diphosphate[c0] + (1) H+[c0] + (1) N-(5-Phospho-D-ribosyl)anthranilate[c0] <= (1) 5-Phospho-alpha-D-ribose 1-diphosphate[c0] + (1) Anthranilate[c0]	PRTRANS-RXN.c	R_R01073_c	R01073_c
rxn00799_c0	(1) (S)-Malate[c0] <=> (1) Fumarate[c0] + (1) H2O[c0]
rxn00800_c0	(1) N6-(1,2-Dicarboxyethyl)-AMP[c0] <=> (1) AMP[c0] + (1) Fumarate[c0]	AMPSYN-RXN.c	R_R01083_c	R01083_c
rxn00802_c0	(1) N-(L-Arginino)succinate[c0] <=> (1) Fumarate[c0] + (1) L-Arginine[c0]	ARGSUCCINLYA-RXN.c	R_R01086_c	R01086_c
rxn00806_c0	(1) 2-Oxoglutarate[c0] + (1) L-Leucine[c0] <=> (1) 4-Methyl-2-oxopentanoate[c0] + (1) L-Glutamate[c0]		R_R01090_c	R01090_c
rxn00821_c0	(1) Dehydroascorbate[c0] + (2) Glutathione[c0] <=> (1) Ascorbate[c0] + (1) Glutathione disulfide[c0]	1.8.5.1-RXN.c
rxn00821_x0	(1) Dehydroascorbate[x0] + (2) Glutathione[x0] <= (1) Ascorbate[x0] + (1) Glutathione disulfide[x0]	1.8.5.1-RXN.c
rxn00829_c0	(1) (R)-5-Diphosphomevalonate[c0] + (1) ATP[c0] => (1) ADP[c0] + (1) CO2[c0] + (1) Isopentenyl diphosphate[c0] + (1) Orthophosphate[c0]	DIPHOSPHOMEVALONTE-DECARBOXYLASE-RXN.c	R_R01121_c	R01121_c
rxn00829_x0	(1) (R)-5-Diphosphomevalonate[x0] + (1) ATP[x0] => (1) ADP[x0] + (1) CO2[x0] + (1) Isopentenyl diphosphate[x0] + (1) Orthophosphate[x0]	DIPHOSPHOMEVALONTE-DECARBOXYLASE-RXN.c	R_R01121_c	R01121_c
rxn00830_c0	(1) Isopentenyl diphosphate[c0] <=> (1) Dimethylallyl diphosphate[c0]	IPPISOM-RXN.c	R_R01123_c	R01123_c
rxn00830_m0	(1) Isopentenyl diphosphate[m0] <=> (1) Dimethylallyl diphosphate[m0]	IPPISOM-RXN.c	R_R01123_c	R01123_c
rxn00832_c0	(1) H2O[c0] + (1) IMP[c0] <=> (1) 1-(5'-Phosphoribosyl)-5-formamido-4-imidazolecarboxamide[c0]	IMPCYCLOHYDROLASE-RXN.c	R_R01127_c	R01127_c
rxn00834_c0	(1) H2O[c0] + (1) IMP[c0] + (1) NAD+[c0] <=> (1) H+[c0] + (1) NADH[c0] + (1) Xanthosine 5'-phosphate[c0]	IMP-DEHYDROG-RXN.c	R_R01130_c	R01130_c
rxn00836_c0	(1) Diphosphate[c0] + (1) H+[c0] + (1) IMP[c0] <= (1) 5-Phospho-alpha-D-ribose 1-diphosphate[c0] + (1) Hypoxanthine[c0]	HYPOXANPRIBOSYLTRAN-RXN.c	R_R01132_c	R01132_c
rxn00838_c0	(1) GTP[c0] + (1) IMP[c0] + (1) L-Aspartate[c0] => (1) GDP[c0] + (2) H+[c0] + (1) N6-(1,2-Dicarboxyethyl)-AMP[c0] + (1) Orthophosphate[c0]	ADENYLOSUCCINATE-SYNTHASE-RXN.c	R_R01135_c	R01135_c
rxn00839_c0	(1) ATP[c0] + (1) dADP[c0] <=> (1) ADP[c0] + (1) dATP[c0]	DADPKIN-RXN.c	R_R01137_c	R01137_c
rxn00839_x0	(1) ATP[x0] + (1) dADP[x0] <=> (1) ADP[x0] + (1) dATP[x0]	DADPKIN-RXN.c	R_R01137_c	R01137_c
rxn00852_c0	(1) H2O[c0] + (1) Oxygen[c0] + (1) Putrescine[c0] => (1) 4-Aminobutyraldehyde[c0] + (1) Hydrogen peroxide[c0] + (1) NH3[c0]	PUTRESCINE-OXIDASE-RXN.c	R_R01151_c	R01151_c
rxn00853_c0	(2) H+[c0] + (1) H2O[c0] + (1) N-Carbamoylputrescine[c0] => (1) CO2[c0] + (1) NH3[c0] + (1) Putrescine[c0]	N-CARBAMOYLPUTRESCINE-AMIDASE-RXN.c
rxn00863_c0	(1) H2O[c0] + (1) L-Histidinal[c0] + (1) NAD+[c0] <=> (2) H+[c0] + (1) L-Histidine[c0] + (1) NADH[c0]	HISTALDEHYD-RXN.c
rxn00872_c0	(1) Butanoyl-CoA[c0] + (1) FAD[c0] + (1) H+[c0] <= (1) Crotonoyl-CoA[c0] + (1) FADH2[c0]
rxn00883_c0	(1) 1D-myo-Inositol 3-phosphate[c0] + (1) H2O[c0] => (1) Orthophosphate[c0] + (1) myo-Inositol[c0]		R_R01187_c	R01187_c
rxn00888_c0	(1) UDP-D-galactose[c0] + (1) myo-Inositol[c0] <=> (1) UDP[c0] + (1) alpha-D-Galactosyl-(1->3)-1D-myo-inositol[c0]	2.4.1.123-RXN.c
rxn00899_c0	(1) 3-Methyl-2-oxobutanoic acid[c0] + (1) CoA[c0] + (1) NAD+[c0] <= (1) 2-Methylpropanoyl-CoA[c0] + (1) CO2[c0] + (1) NADH[c0]
rxn00902_c0	(1) CoA[c0] + (1) H+[c0] + (1) alpha-Isopropylmalate[c0] <= (1) 3-Methyl-2-oxobutanoic acid[c0] + (1) Acetyl-CoA[c0] + (1) H2O[c0]		R_R01213_c	R01213_c
rxn00903_c0	(1) 2-Oxoglutarate[c0] + (1) L-Valine[c0] <=> (1) 3-Methyl-2-oxobutanoic acid[c0] + (1) L-Glutamate[c0]		R_R01214_c	R01214_c
rxn00905_c0	(1) 2-Dehydropantoate[c0] => (1) 3-Methyl-2-oxobutanoic acid[c0] + (1) Formaldehyde[c0]
rxn00907_c0	(1) 5,10-Methylenetetrahydrofolate[c0] + (1) NADP+[c0] <=> (1) 5,10-Methenyltetrahydrofolate[c0] + (1) NADPH[c0]	METHYLENETHFDEHYDROG-NADP-RXN.c	R_R01220_c	R01220_c
rxn00912_c0	(1) 3-Methyl-2-oxobutanoic acid[c0] + (1) 5,10-Methylenetetrahydrofolate[c0] + (1) H2O[c0] <=> (1) 2-Dehydropantoate[c0] + (1) Tetrahydrofolate[c0]	3-CH3-2-OXOBUTANOATE-OH-CH3-XFER-RXN.c	R_R01226_c	R01226_c
rxn00915_c0	(1) Diphosphate[c0] + (1) GMP[c0] + (1) H+[c0] <=> (1) 5-Phospho-alpha-D-ribose 1-diphosphate[c0] + (1) Guanine[c0]	GUANPRIBOSYLTRAN-RXN.c	R_R01229_c	R01229_c
rxn00917_c0	(1) ATP[c0] + (1) H2O[c0] + (1) L-Glutamine[c0] + (1) Xanthosine 5'-phosphate[c0] => (1) AMP[c0] + (1) Diphosphate[c0] + (1) GMP[c0] + (3) H+[c0] + (1) L-Glutamate[c0]	GMP-SYN-GLUT-RXN.c	R_R01231_c	R01231_c
rxn00929_c0	(1) L-Proline[c0] + (1) NAD+[c0] <=> (1) (S)-1-Pyrroline-5-carboxylate[c0] + (2) H+[c0] + (1) NADH[c0]	PYRROLINECARBREDUCT-RXN.c.araexp.NAD_NADH	R_R01248_c	R01248_c
rxn00931_c0	(1) L-Proline[c0] + (1) NADP+[c0] => (1) (S)-1-Pyrroline-5-carboxylate[c0] + (2) H+[c0] + (1) NADPH[c0]	PYRROLINECARBREDUCT-RXN.c.araexp.NADP_NADPH		R01251_c
rxn00937_c0	(1) L-Asparagine[c0] <=> (1) 3-Cyano-L-alanine[c0] + (1) H2O[c0]	3-CYANOALANINE-HYDRATASE-RXN.c
rxn00938_c0	(1) H2O[c0] + (1) Nicotinamide[c0] => (1) NH3[c0] + (1) Nicotinate[c0]	NICOTINAMID-RXN.c|R314-RXN.c
rxn00938_n0	(1) H2O[n0] + (1) Nicotinamide[n0] => (1) NH3[n0] + (1) Nicotinate[n0]	NICOTINAMID-RXN.c|R314-RXN.c
rxn00941_c0	(1) Diphosphate[c0] + (1) Nicotinamide D-ribonucleotide[c0] => (1) 5-Phospho-alpha-D-ribose 1-diphosphate[c0] + (1) Nicotinamide[c0]
rxn00943_c0	(1) H2O[c0] + (1) Palmitoyl-CoA[c0] => (1) CoA[c0] + (1) H+[c0] + (1) Hexadecanoic acid[c0]	PALMITOYL-COA-HYDROLASE-RXN.c
rxn00947_c0	(1) ATP[c0] + (1) CoA[c0] + (1) Hexadecanoic acid[c0] => (1) AMP[c0] + (1) Diphosphate[c0] + (1) H+[c0] + (1) Palmitoyl-CoA[c0]	RXN-7904.c.araexp.PALMITATE_PALMITYL-COA|RXN-9623.c
rxn00974_c0	(1) Citrate[c0] <=> (1) H2O[c0] + (1) cis-Aconitate[c0]	ACONITATEDEHYDR-RXN.c
rxn00979_c0	(1) Glycolaldehyde[c0] + (1) H2O[c0] + (1) NAD+[c0] => (1) Glycolate[c0] + (2) H+[c0] + (1) NADH[c0]	GLYCOLALD-DEHYDROG-RXN.c
rxn00980_c0	(1) 2-Phosphoglycolate[c0] + (1) H2O[c0] <=> (1) Glycolate[c0] + (1) Orthophosphate[c0]
rxn01000_c0	(1) H+[c0] + (1) Prephenate[c0] => (1) CO2[c0] + (1) H2O[c0] + (1) Phenylpyruvate[c0]		R_R01373N_c|R_R01373_c	R01373_c
rxn01004_c0	(1) Phenylpyruvate[c0] <=> (1) 2-Hydroxy-3-phenylpropenoate[c0]	PHENYLPYRUVATE-TAUTOMERASE-RXN.c
rxn01005_c0	(1) D-Glucuronate 1-phosphate[c0] + (1) UTP[c0] <=> (1) Diphosphate[c0] + (1) UDP-glucuronate[c0]	2.7.7.44-RXN.c
rxn01007_c0	(1) H+[c0] + (1) UDP-glucuronate[c0] => (1) CO2[c0] + (1) UDP-D-xylose[c0]	UDP-GLUCURONATE-DECARBOXYLASE-RXN.c	R_R01384_c	R01384_c
rxn01008_c0	(1) UDP-glucuronate[c0] <=> (1) UDP-D-galacturonate[c0]	UDP-GLUCURONATE-4-EPIMERASE-RXN.c
rxn01009_c0	(1) H+[c0] + (1) UDP-glucuronate[c0] => (1) CO2[c0] + (1) UDP-apiose[c0]	RXN-7770.c
rxn01011_c0	(1) D-Glycerate[c0] + (1) NAD+[c0] <= (1) H+[c0] + (1) Hydroxypyruvate[c0] + (1) NADH[c0]	HYDROXYPYRUVATE-REDUCTASE-RXN.c.araexp.NAD_NADH
rxn01013_c0	(1) D-Glycerate[c0] + (1) NADP+[c0] <=> (1) H+[c0] + (1) Hydroxypyruvate[c0] + (1) NADPH[c0]	HYDROXYPYRUVATE-REDUCTASE-RXN.c.araexp.NADP_NADPH|RXN0-300.c
rxn01013_d0	(1) D-Glycerate[d0] + (1) NADP+[d0] <=> (1) H+[d0] + (1) Hydroxypyruvate[d0] + (1) NADPH[d0]	HYDROXYPYRUVATE-REDUCTASE-RXN.c.araexp.NADP_NADPH|RXN0-300.c
rxn01018_c0	(1) Carbamoyl phosphate[c0] + (1) L-Aspartate[c0] <=> (1) H+[c0] + (1) N-Carbamoyl-L-aspartate[c0] + (1) Orthophosphate[c0]	ASPCARBTRANS-RXN.c	R_R01397_c	R01397_c
rxn01019_c0	(1) Carbamoyl phosphate[c0] + (1) L-Ornithine[c0] <=> (1) H+[c0] + (1) L-Citrulline[c0] + (1) Orthophosphate[c0]	ORNCARBAMTRANSFER-RXN.c	R_R01398_c	R01398_c
rxn01021_c0	(1) 5'-Methylthioadenosine[c0] + (1) H2O[c0] <=> (1) 5-Methylthio-D-ribose[c0] + (1) Adenine[c0]	METHYLTHIOADENOSINE-NUCLEOSIDASE-RXN.c
rxn01029_c0	(1) Agmatine[c0] + (1) H2O[c0] => (1) N-Carbamoylputrescine[c0] + (1) NH3[c0]	AGMATINE-DEIMINASE-RXN.c
rxn01032_c0	(1) Aromatic aldehyde[c0] + (1) H2O[c0] + (1) NAD+[c0] <=> (1) Benzoate[c0] + (2) H+[c0] + (1) NADH[c0]	BENZALDEHYDE-DEHYDROGENASE-NAD+-RXN.c
rxn01035_c0	(1) ATP[c0] + (1) Benzoate[c0] + (1) CoA[c0] => (1) AMP[c0] + (1) Diphosphate[c0] + (1) H+[c0] + (1) S-Benzoate coenzyme A[c0]	BENZOATE--COA-LIGASE-RXN.c
rxn01035_d0	(1) ATP[d0] + (1) Benzoate[d0] + (1) CoA[d0] => (1) AMP[d0] + (1) Diphosphate[d0] + (1) H+[d0] + (1) S-Benzoate coenzyme A[d0]	BENZOATE--COA-LIGASE-RXN.c
rxn01035_x0	(1) ATP[x0] + (1) Benzoate[x0] + (1) CoA[x0] => (1) AMP[x0] + (1) Diphosphate[x0] + (1) H+[x0] + (1) S-Benzoate coenzyme A[x0]	BENZOATE--COA-LIGASE-RXN.c
rxn01058_c0	(1) Cholesterol[c0] + (1) NAD+[c0] => (1) 7-Dehydrocholesterol[c0] + (1) H+[c0] + (1) NADH[c0]		R_R01451_c	R01451_c
rxn01063_c0	(1) Cholesterol[c0] + (1) NADP+[c0] <= (1) Desmosterol[c0] + (1) H+[c0] + (1) NADPH[c0]	RXN66-28.c	R_R01457_c	R01457_c
rxn01063_w0	(1) Cholesterol[w0] + (1) NADP+[w0] <= (1) Desmosterol[w0] + (1) H+[w0] + (1) NADPH[w0]	RXN66-28.c	R_R01457_c	R01457_c
rxn01069_c0	(1) H2O[c0] + (1) O-Phospho-L-homoserine[c0] <=> (1) L-Threonine[c0] + (1) Orthophosphate[c0]	THRESYN-RXN.c	R_R01466_c	R01466_c
rxn01071_c0	(1) ATP[c0] + (1) Ethanolamine[c0] <=> (1) ADP[c0] + (1) Ethanolamine phosphate[c0] + (1) H+[c0]	ETHANOLAMINE-KINASE-RXN.c	R_R01468_c	R01468_c
rxn01074_c0	(1) UTP[c0] + (1) alpha-D-Xylose 1-phosphate[c0] <=> (1) Diphosphate[c0] + (1) UDP-D-xylose[c0]	2.7.7.11-RXN.c|2.7.7.64-RXN.c.araexp.CPD-490_UDP-D-XYLOSE
rxn01075_c0	(1) UDP-L-arabinose[c0] <=> (1) UDP-D-xylose[c0]	UDP-ARABINOSE-4-EPIMERASE-RXN.c.araexp.CPD-12513
rxn01099_c0	(1) 3-Phospho-D-glycerate[c0] + (1) H2O[c0] <=> (1) D-Glycerate[c0] + (1) Orthophosphate[c0]	3-PHOSPHOGLYCERATE-PHOSPHATASE-RXN.c
rxn01100_c0	(1) 3-Phospho-D-glycerate[c0] + (1) ATP[c0] <=> (1) 3-Phospho-D-glyceroyl phosphate[c0] + (1) ADP[c0]	PHOSGLYPHOS-RXN.c	R_R01512_c	R01512_c
rxn01101_c0	(1) 3-Phospho-D-glycerate[c0] + (1) NAD+[c0] <=> (1) 3-Phosphonooxypyruvate[c0] + (1) H+[c0] + (1) NADH[c0]	PGLYCDEHYDROG-RXN.c	R_R01513_c	R01513_c
rxn01102_c0	(1) ATP[c0] + (1) D-Glycerate[c0] => (1) 3-Phospho-D-glycerate[c0] + (1) ADP[c0] + (1) H+[c0]	GLY3KIN-RXN.c
rxn01106_c0	(1) 2-Phospho-D-glycerate[c0] <=> (1) 3-Phospho-D-glycerate[c0]	3PGAREARR-RXN.c	R_R01518_c	R01518_c
rxn01111_c0	(1) ATP[c0] + (1) D-Ribulose 5-phosphate[c0] => (1) ADP[c0] + (1) D-Ribulose 1,5-bisphosphate[c0] + (1) H+[c0]	PHOSPHORIBULOKINASE-RXN.c	R_R01523_c	R01523_c
rxn01115_c0	(1) 6-Phospho-D-gluconate[c0] + (1) NADP+[c0] => (1) CO2[c0] + (1) D-Ribulose 5-phosphate[c0] + (1) NADPH[c0]	6PGLUCONDEHYDROG-RXN.c.araexp.NADP_NADPH|RXN-9952.c	R_R01528_c	R01528_c
rxn01116_c0	(1) D-Ribulose 5-phosphate[c0] <=> (1) D-Xylulose 5-phosphate[c0]	RIBULP3EPIM-RXN.c	R_R01529_c	R01529_c
rxn01117_c0	(1) D-Arabinose 5-phosphate[c0] <=> (1) D-Ribulose 5-phosphate[c0]	DARAB5PISOM-RXN.c
rxn01132_c0	(1) Maltose[c0] + (1) Orthophosphate[c0] => (1) D-Glucose[c0] + (1) beta-D-Glucose 1-phosphate[c0]
rxn01169_c0	(1) ATP[c0] + (1) beta-D-Glucose[c0] => (1) ADP[c0] + (1) H+[c0] + (1) beta-D-Glucose 6-phosphate[c0]	GLUCOKIN-RXN.c|R81-RXN.c	R_R01600_c	R01600_c
rxn01171_c0	(1) alpha-D-Glucose[c0] <=> (1) beta-D-Glucose[c0]	ALDOSE-1-EPIMERASE-RXN.c	R_R01602_c	R01602_c
rxn01174_c0	(1) 3-Hydroxypropanoate[c0] + (1) NAD+[c0] <=> (1) 3-Oxopropanoate[c0] + (1) H+[c0] + (1) NADH[c0]	3-HYDROXYPROPIONATE-DEHYDROGENASE-RXN.c
rxn01179_c0	(3) H+[c0] + (3) Malonyl-CoA[c0] + (1) p-Coumaroyl-CoA[c0] => (3) CO2[c0] + (4) CoA[c0] + (1) Naringenin chalcone[c0]	NARINGENIN-CHALCONE-SYNTHASE-RXN.c	R_R01613_c	R01613_c
rxn01179_n0	(3) H+[n0] + (3) Malonyl-CoA[n0] + (1) p-Coumaroyl-CoA[n0] => (3) CO2[n0] + (4) CoA[n0] + (1) Naringenin chalcone[n0]	NARINGENIN-CHALCONE-SYNTHASE-RXN.c	R_R01613_c	R01613_c
rxn01179_r0	(3) H+[r0] + (3) Malonyl-CoA[r0] + (1) p-Coumaroyl-CoA[r0] => (3) CO2[r0] + (4) CoA[r0] + (1) Naringenin chalcone[r0]	NARINGENIN-CHALCONE-SYNTHASE-RXN.c	R_R01613_c	R01613_c
rxn01181_c0	(1) 4-Hydroxycinnamyl aldehyde[c0] + (1) CoA[c0] + (1) NADP+[c0] <=> (1) H+[c0] + (1) NADPH[c0] + (1) p-Coumaroyl-CoA[c0]	RXN-1101.c	R_R01615_c	R01615_c
rxn01182_c0	(1) 4-Coumarate[c0] + (1) ATP[c0] + (1) CoA[c0] => (1) AMP[c0] + (1) Diphosphate[c0] + (1) H+[c0] + (1) p-Coumaroyl-CoA[c0]	4-COUMARATE--COA-LIGASE-RXN.c	R_R01616_c	R01616_c
rxn01199_c0	(1) ATP[c0] + (1) D-Xylulose[c0] <=> (1) ADP[c0] + (1) D-Xylulose 5-phosphate[c0] + (1) H+[c0]	XYLULOKIN-RXN.c	R_R01639_c	R01639_c
rxn01199_d0	(1) ATP[d0] + (1) D-Xylulose[d0] => (1) ADP[d0] + (1) D-Xylulose 5-phosphate[d0] + (1) H+[d0]	XYLULOKIN-RXN.c	R_R01639_c	R01639_c
rxn01200_c0	(1) D-Glyceraldehyde 3-phosphate[c0] + (1) Sedoheptulose 7-phosphate[c0] <=> (1) D-Ribose 5-phosphate[c0] + (1) D-Xylulose 5-phosphate[c0]	1TRANSKETO-RXN.c	R_R01641_c	R01641_c
rxn01208_c0	(1) 4-Methyl-2-oxopentanoate[c0] + (1) CO2[c0] <= (1) (2S)-2-Isopropyl-3-oxosuccinate[c0] + (1) H+[c0]	RXN-7800.c	R_R01652_c	R01652_c
rxn01211_c0	(1) 5,10-Methenyltetrahydrofolate[c0] + (1) H2O[c0] <= (1) 10-Formyltetrahydrofolate[c0] + (1) H+[c0]	METHENYLTHFCYCLOHYDRO-RXN.c	R_R01655_c	R01655_c
rxn01211_d0	(1) 5,10-Methenyltetrahydrofolate[d0] + (1) H2O[d0] <=> (1) 10-Formyltetrahydrofolate[d0] + (1) H+[d0]	METHENYLTHFCYCLOHYDRO-RXN.c	R_R01655_c	R01655_c
rxn01213_c0	(1) Dimethylallyl diphosphate[c0] + (1) Isopentenyl diphosphate[c0] => (1) Diphosphate[c0] + (1) Geranyl diphosphate[c0] + (1) H+[c0]	GPPSYN-RXN.c	R_R01658_c	R01658_c
rxn01213_m0	(1) Dimethylallyl diphosphate[m0] + (1) Isopentenyl diphosphate[m0] => (1) Diphosphate[m0] + (1) Geranyl diphosphate[m0] + (1) H+[m0]	GPPSYN-RXN.c	R_R01658_c	R01658_c
rxn01219_c0	(1) ATP[c0] + (1) H+[c0] + (1) dCMP[c0] <=> (1) ADP[c0] + (1) dCDP[c0]	RXN-7913.c	R_R01665_c	R01665_c
rxn01221_c0	(1) H2O[c0] + (1) dCDP[c0] => (2) H+[c0] + (1) Orthophosphate[c0] + (1) dCMP[c0]	NUCLEOSIDE-DIPHOSPHATASE-RXN.c.araexp.DCDP_DCMP
rxn01225_c0	(1) Guanine[c0] + (1) H+[c0] + (1) H2O[c0] => (1) NH3[c0] + (1) Xanthine[c0]	GUANINE-DEAMINASE-RXN.c	R_R01676_c	R01676_c
rxn01229_c0	(1) FAD[c0] + (1) Lactose[c0] => (1) 3-Ketolactose[c0] + (1) FADH2[c0]
rxn01249_c0	(1) NADP+[c0] + (1) Pyridoxine[c0] <=> (1) H+[c0] + (1) NADPH[c0] + (1) Pyridoxal[c0]	PYRIDOXINE-4-DEHYDROGENASE-RXN.c
rxn01255_c0	(1) 5-O-(1-Carboxyvinyl)-3-phosphoshikimate[c0] => (1) Chorismate[c0] + (1) Orthophosphate[c0]	CHORISMATE-SYNTHASE-RXN.c	R_R01714_c	R01714_c
rxn01256_c0	(1) Chorismate[c0] => (1) Prephenate[c0]	CHORISMATEMUT-RXN.c	R_R01715_c	R01715_c
rxn01257_c0	(1) Chorismate[c0] + (1) L-Glutamine[c0] <=> (1) 4-Amino-4-deoxychorismate[c0] + (1) L-Glutamate[c0]	PABASYN-RXN.c	R_R01716_c	R01716_c
rxn01258_c0	(1) Chorismate[c0] <=> (1) Isochorismate[c0]	ISOCHORSYN-RXN.c	R_R01717_c	R01717_c
rxn01265_c0	(1) Diphosphate[c0] + (1) Nicotinate D-ribonucleotide[c0] <= (1) 5-Phospho-alpha-D-ribose 1-diphosphate[c0] + (1) Nicotinate[c0]	NICOTINATEPRIBOSYLTRANS-RXN.c	R_R01724_c	R01724_c
rxn01268_c0	(1) NAD+[c0] + (1) Prephenate[c0] => (1) 3-(4-Hydroxyphenyl)pyruvate[c0] + (1) CO2[c0] + (1) NADH[c0]	PREPHENATEDEHYDROG-RXN.c	R_R01728_c	R01728_c
rxn01274_c0	(1) (R)-S-Lactoylglutathione[c0] + (1) H2O[c0] => (1) (R)-Lactate[c0] + (1) Glutathione[c0] + (1) H+[c0]	GLYOXII-RXN.c	R_R01736_c	R01736_c
rxn01275_c0	(1) ATP[c0] + (1) D-Gluconic acid[c0] => (1) 6-Phospho-D-gluconate[c0] + (1) ADP[c0] + (1) H+[c0]	GLUCONOKIN-RXN.c	R_R01737_c	R01737_c
rxn01296_c0	(1) Mandelonitrile[c0] <= (1) Aromatic aldehyde[c0] + (1) Cyanide[c0]			R01767_c
rxn01297_c0	(1) H2O[c0] + (1) Hypoxanthine[c0] + (1) NAD+[c0] <=> (1) H+[c0] + (1) NADH[c0] + (1) Xanthine[c0]	RXN-7682.c	R_R01768_c	R01768_c
rxn01299_c0	(1) H2O[c0] + (1) Inosine[c0] <= (1) D-Ribose[c0] + (1) Hypoxanthine[c0]		R_R01770_c	R01770_c
rxn01301_c0	(1) L-Homoserine[c0] + (1) NAD+[c0] <=> (1) H+[c0] + (1) L-Aspartate 4-semialdehyde[c0] + (1) NADH[c0]	HOMOSERDEHYDROG-RXN.c.araexp.NAD_NADH	R_R01773_c	R01773_c
rxn01302_c0	(1) L-Homoserine[c0] + (1) NADP+[c0] <=> (1) H+[c0] + (1) L-Aspartate 4-semialdehyde[c0] + (1) NADPH[c0]	HOMOSERDEHYDROG-RXN.c.araexp.NADP_NADPH		R01775_c
rxn01329_c0	(1) D-Mannose 6-phosphate[c0] <=> (1) D-Mannose 1-phosphate[c0]	PHOSMANMUT-RXN.c	R_R01818_c	R01818_c
rxn01332_c0	(1) D-Erythrose 4-phosphate[c0] + (1) H2O[c0] + (1) Phosphoenolpyruvate[c0] => (1) 2-Dehydro-3-deoxy-D-arabino-heptonate 7-phosphate[c0] + (1) Orthophosphate[c0]	DAHPSYN-RXN.c	R_R01826_c	R01826_c
rxn01333_c0	(1) D-Glyceraldehyde 3-phosphate[c0] + (1) Sedoheptulose 7-phosphate[c0] <=> (1) D-Erythrose 4-phosphate[c0] + (1) beta-D-Fructose 6-phosphate[c0]	TRANSALDOL-RXN.c	R_R01827_c	R01827_c
rxn01334_c0	(1) Sedoheptulose 1,7-bisphosphate[c0] <=> (1) D-Erythrose 4-phosphate[c0] + (1) Glycerone phosphate[c0]	SEDOBISALDOL-RXN.c	R_R01829_c	R01829_c
rxn01345_c0	(1) H2O[c0] + (1) Sedoheptulose 1,7-bisphosphate[c0] <=> (1) Orthophosphate[c0] + (1) Sedoheptulose 7-phosphate[c0]	SEDOHEPTULOSE-BISPHOSPHATASE-RXN.c	R_R01845_c
rxn01351_c0	(1) H2O[c0] + (1) dGTP[c0] => (1) Diphosphate[c0] + (2) H+[c0] + (1) dGMP[c0]	3.6.1.19-RXN.c.araexp.DGMP_DGTP	R_R01855_c	R01855_c
rxn01353_c0	(1) ATP[c0] + (1) dGDP[c0] <=> (1) ADP[c0] + (1) dGTP[c0]	DGDPKIN-RXN.c	R_R01857_c	R01857_c
rxn01353_x0	(1) ATP[x0] + (1) dGDP[x0] <=> (1) ADP[x0] + (1) dGTP[x0]	DGDPKIN-RXN.c	R_R01857_c	R01857_c
rxn01362_c0	(1) Diphosphate[c0] + (1) H+[c0] + (1) Orotidine 5'-phosphate[c0] <= (1) 5-Phospho-alpha-D-ribose 1-diphosphate[c0] + (1) Orotate[c0]	OROPRIBTRANS-RXN.c	R_R01870_c	R01870_c
rxn01365_c0	(1) D-Cysteine[c0] + (1) H2O[c0] => (1) H+[c0] + (1) Hydrogen sulfide[c0] + (1) NH3[c0] + (1) Pyruvate[c0]	DCYSDESULF-RXN.c
rxn01368_c0	(1) Cytidine[c0] + (1) H+[c0] + (1) H2O[c0] => (1) NH3[c0] + (1) Uridine[c0]	CYTIDEAM2-RXN.c	R_R01878_c	R01878_c
rxn01380_c0	(1) CTP[c0] + (1) Choline phosphate[c0] <=> (1) CDP-choline[c0] + (1) Diphosphate[c0]	2.7.7.15-RXN.c	R_R01890_c	R01890_c
rxn01396_c0	(1) ATP[c0] + (1) Pyridoxine[c0] => (1) ADP[c0] + (1) H+[c0] + (1) Pyridoxine phosphate[c0]	PNKIN-RXN.c	R_R01909_c	R01909_c
rxn01406_c0	(1) Putrescine[c0] + (1) S-Adenosylmethioninamine[c0] <=> (1) 5'-Methylthioadenosine[c0] + (1) H+[c0] + (1) Spermidine[c0]	SPERMIDINESYN-RXN.c	R_R01920_c	R01920_c
rxn01426_c0	(1) Caffeoyl-CoA[c0] + (1) S-Adenosyl-L-methionine[c0] <=> (1) Feruloyl-CoA[c0] + (1) H+[c0] + (1) S-Adenosyl-L-homocysteine[c0]	CAFFEOYL-COA-O-METHYLTRANSFERASE-RXN.c	R_R01942_c	R01942_c
rxn01427_c0	(1) ATP[c0] + (1) Caffeate[c0] + (1) CoA[c0] => (1) AMP[c0] + (1) Caffeoyl-CoA[c0] + (1) Diphosphate[c0] + (1) H+[c0]	RXN-1126.c	R_R01943_c	R01943_c
rxn01429_c0	(1) Caffeoyl-CoA[c0] + (1) Quinate[c0] => (1) Chlorogenate[c0] + (1) CoA[c0]	RXN-2622.c
rxn01434_c0	(1) ATP[c0] + (1) L-Aspartate[c0] + (1) L-Citrulline[c0] => (1) AMP[c0] + (1) Diphosphate[c0] + (2) H+[c0] + (1) N-(L-Arginino)succinate[c0]	ARGSUCCINSYN-RXN.c	R_R01954_c	R01954_c
rxn01450_c0	(1) H+[c0] + (1) Indolepyruvate[c0] <= (1) CO2[c0] + (1) Indole-3-acetaldehyde[c0]	4.1.1.74-RXN.c
rxn01454_c0	(1) (S)-3-Hydroxy-3-methylglutaryl-CoA[c0] + (1) CoA[c0] + (1) H+[c0] <= (1) Acetoacetyl-CoA[c0] + (1) Acetyl-CoA[c0] + (1) H2O[c0]	HYDROXYMETHYLGLUTARYL-COA-SYNTHASE-RXN.c	R_R01978_c	R01978_c
rxn01455_c0	(1) ATP[c0] + (1) D-Galacturonate[c0] => (1) 1-Phospho-alpha-D-galacturonate[c0] + (1) ADP[c0] + (1) H+[c0]	GALACTURONOKINASE-RXN.c|GALACTURONOKINASE-RXN.c.araexp.D-GALACTURONATE
rxn01465_c0	(1) (S)-Dihydroorotate[c0] + (1) H2O[c0] <=> (1) H+[c0] + (1) N-Carbamoyl-L-aspartate[c0]	DIHYDROOROT-RXN.c	R_R01993_c	R01993_c
rxn01466_c0	(1) Geranyl diphosphate[c0] + (1) Isopentenyl diphosphate[c0] => (1) Diphosphate[c0] + (1) H+[c0] + (1) trans,trans-Farnesyl diphosphate[c0]	FPPSYN-RXN.c	R_R02003_c	R02003_c
rxn01471_c0	(1) Geranyl diphosphate[c0] <=> (1) Diphosphate[c0] + (1) H+[c0] + (1) Myrcene[c0]	RXN-5110.c		R02009_c
rxn01472_c0	(1) Geranyl diphosphate[c0] => (1) Diphosphate[c0] + (1) H+[c0] + (1) Terpinolene[c0]	RXN-5108.c		R02010_c
rxn01473_c0	(1) Geranyl diphosphate[c0] => (1) (-)-Limonene[c0] + (1) Diphosphate[c0] + (1) H+[c0]	4.2.3.16-RXN.c
rxn01476_c0	(1) D-Glucono-1,5-lactone 6-phosphate[c0] + (1) H2O[c0] <=> (1) 6-Phospho-D-gluconate[c0] + (1) H+[c0]	6PGLUCONOLACT-RXN.c	R_R02035_c	R02035_c
rxn01478_c0	(1) Ethanolamine phosphate[c0] + (1) S-Adenosyl-L-methionine[c0] <=> (1) H+[c0] + (1) N-Methylethanolamine phosphate[c0] + (1) S-Adenosyl-L-homocysteine[c0]	2.1.1.103-RXN.c	R_R02037_c	R02037_c
rxn01479_c0	(1) CTP[c0] + (1) Ethanolamine phosphate[c0] <=> (1) CDP-ethanolamine[c0] + (1) Diphosphate[c0]	2.7.7.14-RXN.c	R_R02038_c	R02038_c
rxn01483_c0	(1) Acetyl-CoA[c0] + (1) D-Glucosamine 6-phosphate[c0] => (1) CoA[c0] + (1) H+[c0] + (1) N-Acetyl-D-glucosamine 6-phosphate[c0]	GLUCOSAMINEPNACETYLTRANS-RXN.c|GLUCOSAMINEPNACETYLTRANS-RXN.c.araexp.D-GLUCOSAMINE-6-P	R_R02058_c	R02058_c
rxn01487_c0	(1) Geranylgeranyl diphosphate[c0] + (3) H+[c0] + (3) NADPH[c0] <= (3) NADP+[c0] + (1) Phytyl diphosphate[c0]	RXN-10625.c	R_R02063_c	R02063_c
rxn01489_c0	(2) Geranylgeranyl diphosphate[c0] <=> (1) Diphosphate[c0] + (1) H+[c0] + (1) Prephytoene diphosphate[c0]	2.5.1.32-RXN.c		R02065_c
rxn01490_c0	(1) Geranylgeranyl diphosphate[c0] => (1) ent-Copalyl diphosphate[c0]	5.5.1.13-RXN.c	R_R02068_c	R02068_c
rxn01494_c0	(1) 3,4-Dihydroxy-L-phenylalanine[c0] + (1) Oxygen[c0] => (1) 4-(L-Alanin-3-yl)-2-hydroxy-cis,cis-muconate 6-semialdehyde[c0] + (1) H+[c0]	RXN-8460.c
rxn01498_c0	(1) 3,4-Dihydroxy-L-phenylalanine[c0] <= (1) Caffeate[c0] + (1) NH3[c0]
rxn01501_c0	(1) (R)-Mevalonate[c0] + (1) CoA[c0] + (2) NADP+[c0] <= (1) (S)-3-Hydroxy-3-methylglutaryl-CoA[c0] + (2) H+[c0] + (2) NADPH[c0]	1.1.1.34-RXN.c	R_R02082_c	R02082_c
rxn01505_c0	(1) N-Acetyl-D-glucosamine 6-phosphate[c0] <=> (1) N-Acetyl-alpha-D-glucosamine 1-phosphate[c0]	PHOSACETYLGLUCOSAMINEMUT-RXN.c	R_R08193_c	R08193_c
rxn01509_c0	(1) ATP[c0] + (1) H+[c0] + (1) dGMP[c0] <=> (1) ADP[c0] + (1) dGDP[c0]	GMKALT-RXN.c	R_R02090_c	R02090_c
rxn01520_c0	(1) 5,10-Methylenetetrahydrofolate[c0] + (1) dUMP[c0] <=> (1) Dihydrofolate[c0] + (1) dTMP[c0]	THYMIDYLATESYN-RXN.c	R_R02101_c	R02101_c
rxn01522_c0	(1) H2O[c0] + (1) NAD+[c0] + (1) Xanthine[c0] <=> (1) H+[c0] + (1) NADH[c0] + (1) Urate[c0]	RXN0-901.c	R_R02103_c	R02103_c
rxn01524_c0	(1) H2O[c0] + (1) Oxygen[c0] + (1) Xanthine[c0] => (1) Hydrogen peroxide[c0] + (1) Urate[c0]	XANTHINE-OXIDASE-RXN.c	R_R02107_c	R02107_c
rxn01527_c0	(1) UDP-glucose[c0] + (1) Zeatin[c0] <=> (1) O-beta-D-Glucosylzeatin[c0] + (1) UDP[c0]	RXN-4723.c.araexp.CPD-12575
rxn01545_c0	(1) H2O[c0] + (1) Xanthosine[c0] <= (1) D-Ribose[c0] + (1) Xanthine[c0]		R_R02143_c	R02143_c
rxn01556_c0	(1) Quercetin[c0] + (1) S-Adenosyl-L-methionine[c0] <=> (1) 3-O-Methylquercetin[c0] + (1) H+[c0] + (1) S-Adenosyl-L-homocysteine[c0]	QUERCETIN-3-O-METHYLTRANSFERASE-RXN.c|QUERCETIN-3-O-METHYLTRANSFERASE-RXN.c.araexp.CPD-520	R_R02157_c	R02157_c
rxn01556_n0	(1) Quercetin[n0] + (1) S-Adenosyl-L-methionine[n0] <=> (1) 3-O-Methylquercetin[n0] + (1) H+[n0] + (1) S-Adenosyl-L-homocysteine[n0]	QUERCETIN-3-O-METHYLTRANSFERASE-RXN.c|QUERCETIN-3-O-METHYLTRANSFERASE-RXN.c.araexp.CPD-520	R_R02157_c	R02157_c
rxn01557_c0	(1) Quercetin[c0] + (1) UDP-glucose[c0] <=> (1) Quercetin 3-O-glucoside[c0] + (1) UDP[c0]	RXN-10787.c.araexp.CPD-12575_CPD-520	R_R02158_c	R02158_c
rxn01558_c0	(1) 3'-Phosphoadenylyl sulfate[c0] + (1) Quercetin[c0] => (1) Adenosine 3',5'-bisphosphate[c0] + (1) H+[c0] + (1) Quercetin 3-sulfate[c0]	FLAVONOL-3-SULFOTRANSFERASE-RXN.c|FLAVONOL-3-SULFOTRANSFERASE-RXN.c.araexp.CPD-520
rxn01559_c0	(1) 2-Oxoglutarate[c0] + (1) Oxygen[c0] + (1) Taxifolin[c0] => (1) CO2[c0] + (1) H+[c0] + (1) H2O[c0] + (1) Quercetin[c0] + (1) Succinate[c0]	RXN-527.c|RXN-527.c.araexp.CPD-520	R_R02160_c	R02160_c
rxn01566_c0	(1) (-)-Menthol[c0] + (1) NADP+[c0] <=> (1) (-)-Menthone[c0] + (1) H+[c0] + (1) NADPH[c0]	#NAME?
rxn01570_c0	(1) CoA[c0] + (1) Coniferyl aldehyde[c0] + (1) NADP+[c0] <=> (1) Feruloyl-CoA[c0] + (1) H+[c0] + (1) NADPH[c0]	RXN-1106.c	R_R02193_c	R02193_c
rxn01571_c0	(1) ATP[c0] + (1) CoA[c0] + (1) Ferulate[c0] => (1) AMP[c0] + (1) Diphosphate[c0] + (1) Feruloyl-CoA[c0] + (1) H+[c0]	6.2.1.34-RXN.c|RXN-1105.c	R_R02194_c	R02194_c
rxn01575_c0	(1) 2-Oxoglutarate[c0] + (1) L-Isoleucine[c0] <=> (1) (S)-3-Methyl-2-oxopentanoic acid[c0] + (1) L-Glutamate[c0]		R_R02199_c	R02199_c
rxn01588_c0	(1) H+[c0] + (1) NADPH[c0] + (1) Progesterone[c0] => (1) 5beta-Pregnane-3,20-dione[c0] + (1) NADP+[c0]	RXN-9726.c
rxn01603_c0	(1) ATP[c0] + (1) Dihydropteroate[c0] + (1) L-Glutamate[c0] <=> (1) ADP[c0] + (1) Dihydrofolate[c0] + (1) H+[c0] + (1) Orthophosphate[c0]		R_R02237_c	R02237_c
rxn01607_c0	(1) (R)-Mevalonate[c0] + (1) ATP[c0] => (1) (R)-5-Phosphomevalonate[c0] + (1) ADP[c0] + (1) H+[c0]	MEVALONATE-KINASE-RXN.c	R_R02245_c	R02245_c
rxn01613_c0	(1) ATP[c0] + (1) CoA[c0] + (1) trans-Cinnamate[c0] => (1) AMP[c0] + (1) Cinnamoyl-CoA[c0] + (1) Diphosphate[c0] + (1) H+[c0]	RXN-2001.c	R_R02255_c	R02255_c
rxn01626_c0	(1) 5,6-Dihydrouracil[c0] + (1) H2O[c0] => (1) 3-Ureidopropionate[c0] + (1) H+[c0]	DIHYDROPYRIMIDINASE-RXN.c	R_R02269_c	R02269_c
rxn01626_r0	(1) 5,6-Dihydrouracil[r0] + (1) H2O[r0] => (1) 3-Ureidopropionate[r0] + (1) H+[r0]	DIHYDROPYRIMIDINASE-RXN.c	R_R02269_c	R02269_c
rxn01629_c0	(1) 5-Aminolevulinate[c0] <=> (1) (S)-4-Amino-5-oxopentanoate[c0]	GSAAMINOTRANS-RXN.c	R_R02272_c	R02272_c
rxn01636_c0	(1) L-Glutamate[c0] + (1) N-Acetylornithine[c0] <=> (1) L-Ornithine[c0] + (1) N-Acetyl-L-glutamate[c0]	GLUTAMATE-N-ACETYLTRANSFERASE-RXN.c	R_R02282_c	R02282_c
rxn01637_c0	(1) 2-Oxoglutarate[c0] + (1) N-Acetylornithine[c0] <=> (1) L-Glutamate[c0] + (1) N-Acetyl-L-glutamate 5-semialdehyde[c0]	ACETYLORNTRANSAM-RXN.c	R_R02283_c	R02283_c
rxn01643_c0	(1) L-Aspartate 4-semialdehyde[c0] + (1) NADP+[c0] + (1) Orthophosphate[c0] <=> (1) 4-Phospho-L-aspartate[c0] + (1) H+[c0] + (1) NADPH[c0]	ASPARTATE-SEMIALDEHYDE-DEHYDROGENASE-RXN.c	R_R02291_c	R02291_c
rxn01644_c0	(1) L-Aspartate 4-semialdehyde[c0] + (1) Pyruvate[c0] <=> (1) H+[c0] + (2) H2O[c0] + (1) L-2,3-Dihydrodipicolinate[c0]	DIHYDRODIPICSYN-RXN.c	R_R02292_c	R02292_c
rxn01653_c0	(1) ATP[c0] + (1) Folinic acid[c0] => (1) 5,10-Methenyltetrahydrofolate[c0] + (1) ADP[c0] + (1) Orthophosphate[c0]	5-FORMYL-THF-CYCLO-LIGASE-RXN.c	R_R02301_c	R02301_c
rxn01662_c0	(1) H2O[c0] + (1) N6-(L-1,3-Dicarboxypropyl)-L-lysine[c0] + (1) NAD+[c0] <=> (1) H+[c0] + (1) L-2-Aminoadipate 6-semialdehyde[c0] + (1) L-Glutamate[c0] + (1) NADH[c0]	1.5.1.9-RXN.c	R_R02313_c	R02313_c
rxn01664_c0	(1) (S)-2,3,4,5-Tetrahydropyridine-2-carboxylate[c0] + (1) H+[c0] + (1) H2O[c0] <= (1) L-2-Aminoadipate 6-semialdehyde[c0]	RXN-8173.c
rxn01672_c0	(1) H+[c0] + (1) H2O[c0] + (1) dCTP[c0] => (1) NH3[c0] + (1) dUTP[c0]	DCTP-DEAM-RXN.c
rxn01692_c0	(1) Estradiol-17beta[c0] + (1) NAD+[c0] <= (1) Estrone[c0] + (1) H+[c0] + (1) NADH[c0]	ESTRADIOL-17-BETA-DEHYDROGENASE-RXN.c.araexp.NAD_NADH
rxn01693_c0	(1) Estradiol-17beta[c0] + (1) NADP+[c0] <=> (1) Estrone[c0] + (1) H+[c0] + (1) NADPH[c0]	ESTRADIOL-17-BETA-DEHYDROGENASE-RXN.c.araexp.NADP_NADPH|RXN-12084.c
rxn01705_c0	(1) Cytidine[c0] + (1) dCTP[c0] <= (1) CMP[c0] + (1) H+[c0] + (1) dCDP[c0]		R_R02371_c	R02371_c
rxn01712_c0	(1) 5-Hydroxyferulic acid methyl ester[c0] + (1) S-Adenosyl-L-methionine[c0] => (1) H+[c0] + (1) S-Adenosyl-L-homocysteine[c0] + (1) Sinapate[c0]	RXN-3422.c	R_R02379_c	R02379_c
rxn01713_c0	(1) H+[c0] + (1) Sinapate[c0] + (1) UDP-glucose[c0] => (1) 1-O-Sinapoyl-beta-D-glucose[c0] + (1) UDP[c0]	SINAPATE-1-GLUCOSYLTRANSFERASE-RXN.c.araexp.CPD-12575		R02380_c
rxn01714_c0	(1) H2O[c0] + (1) Sinapine[c0] => (1) Choline[c0] + (1) H+[c0] + (1) Sinapate[c0]	SINAPINE-ESTERASE-RXN.c
rxn01718_c0	(1) Feruloyl-CoA[c0] + (1) Tyramine[c0] => (1) CoA[c0] + (1) H+[c0] + (1) N-Feruloyltyramine[c0]	TYRAMINE-N-FERULOYLTRANSFERASE-RXN.c
rxn01737_c0	(1) H2O[c0] + (1) Raffinose[c0] => (1) D-Fructose[c0] + (1) Melibiose[c0]		R_R02410_c	R02410_c
rxn01738_c0	(1) Sucrose[c0] + (1) alpha-D-Galactosyl-(1->3)-1D-myo-inositol[c0] <=> (1) Raffinose[c0] + (1) myo-Inositol[c0]	2.4.1.82-RXN.c	R_R02411_c	R02411_c
rxn01739_c0	(1) ATP[c0] + (1) Shikimate[c0] => (1) ADP[c0] + (1) H+[c0] + (1) Shikimate 3-phosphate[c0]	SHIKIMATE-KINASE-RXN.c	R_R02412_c	R02412_c
rxn01740_c0	(1) NADP+[c0] + (1) Shikimate[c0] <=> (1) 3-Dehydroshikimate[c0] + (1) H+[c0] + (1) NADPH[c0]	RXN-7968.c.araexp.NADP_NADPH|SHIKIMATE-5-DEHYDROGENASE-RXN.c	R_R02413_c	R02413_c
rxn01743_c0	(1) Shikimate[c0] + (1) p-Coumaroyl-CoA[c0] => (1) 4-Coumaroylshikimate[c0] + (1) CoA[c0]	2.3.1.133-RXN.c
rxn01746_c0	(1) Allantoate[c0] + (1) H2O[c0] <= (1) (-)-Ureidoglycolate[c0] + (1) Urea[c0]	ALLANTOICASE-RXN.c	R_R02422_c	R02422_c
rxn01747_c0	(1) Allantoate[c0] + (2) H+[c0] + (1) H2O[c0] => (1) (S)-Ureidoglycine[c0] + (1) CO2[c0] + (1) NH3[c0]	ALLANTOATE-DEIMINASE-RXN.c
rxn01767_c0	(1) 2-Oxoglutarate[c0] + (1) Naringenin[c0] + (1) Oxygen[c0] <=> (1) CO2[c0] + (1) Dihydrokaempferol[c0] + (1) Succinate[c0]	NARINGENIN-3-DIOXYGENASE-RXN.c	R_R02444_c	R02444_c
rxn01769_c0	(1) Naringenin[c0] <=> (1) Naringenin chalcone[c0]	CHALCONE-ISOMERASE-RXN.c.araexp.APIGENIN_NARINGENIN-CMPD	R_R02446_c	R02446_c
rxn01769_n0	(1) Naringenin[n0] <= (1) Naringenin chalcone[n0]	CHALCONE-ISOMERASE-RXN.c.araexp.APIGENIN_NARINGENIN-CMPD	R_R02446_c	R02446_c
rxn01769_r0	(1) Naringenin[r0] <= (1) Naringenin chalcone[r0]	CHALCONE-ISOMERASE-RXN.c.araexp.APIGENIN_NARINGENIN-CMPD	R_R02446_c	R02446_c
rxn01782_c0	(1) Hexadecanal[c0] + (1) NADP+[c0] <= (1) H+[c0] + (1) Hexadecenal[c0] + (1) NADPH[c0]	2-HEXADECENAL-REDUCTASE-RXN.c
rxn01782_n0	(1) Hexadecanal[n0] + (1) NADP+[n0] <= (1) H+[n0] + (1) Hexadecenal[n0] + (1) NADPH[n0]	2-HEXADECENAL-REDUCTASE-RXN.c
rxn01790_c0	(1) (R)-Pantoate[c0] + (1) NADP+[c0] <=> (1) 2-Dehydropantoate[c0] + (1) H+[c0] + (1) NADPH[c0]	2-DEHYDROPANTOATE-REDUCT-RXN.c
rxn01791_c0	(1) (R)-Pantoate[c0] + (1) ATP[c0] + (1) beta-Alanine[c0] => (1) AMP[c0] + (1) Diphosphate[c0] + (2) H+[c0] + (1) Pantothenate[c0]	PANTOATE-BETA-ALANINE-LIG-RXN.c	R_R02473_c	R02473_c
rxn01800_c0	(1) Deoxycytidine[c0] + (1) H+[c0] + (1) H2O[c0] => (1) Deoxyuridine[c0] + (1) NH3[c0]	CYTIDEAM-RXN.c	R_R02485_c	R02485_c
rxn01807_c0	(1) ATP[c0] + (1) Pyridoxamine[c0] => (1) ADP[c0] + (1) H+[c0] + (1) Pyridoxamine phosphate[c0]	PYRAMKIN-RXN.c	R_R02493_c	R02493_c
rxn01808_c0	(1) Orthophosphate[c0] + (1) Pyridoxamine[c0] <= (1) H2O[c0] + (1) Pyridoxamine phosphate[c0]
rxn01815_c0	(1) Cinnamaldehyde[c0] + (1) CoA[c0] + (1) NADP+[c0] <=> (1) Cinnamoyl-CoA[c0] + (1) H+[c0] + (1) NADPH[c0]	CINNAMOYL-COA-REDUCTASE-RXN.c		R02506_c
rxn01827_c0	(1) 3-(4-Hydroxyphenyl)pyruvate[c0] + (1) Oxygen[c0] => (1) CO2[c0] + (1) Homogentisate[c0]	4-HYDROXYPHENYLPYRUVATE-DIOXYGENASE-RXN.c	R_R02521_c	R02521_c
rxn01832_c0	(1) H+[c0] + (1) Methylglyoxal[c0] + (1) NADPH[c0] <=> (1) Hydroxyacetone[c0] + (1) NADP+[c0]	RXN0-4281.c
rxn01850_c0	(1) (+)-Neomenthol[c0] + (1) NADP+[c0] <=> (1) (-)-Menthone[c0] + (1) H+[c0] + (1) NADPH[c0]	#NAME?
rxn01867_c0	(1) Betaine aldehyde[c0] + (1) H2O[c0] + (1) NAD+[c0] <= (1) Betaine[c0] + (2) H+[c0] + (1) NADH[c0]		R_R02565_c	R02565_c
rxn01887_c0	(1) Coniferyl alcohol[c0] + (1) NADP+[c0] <=> (1) Coniferyl aldehyde[c0] + (1) H+[c0] + (1) NADPH[c0]	RXN-11654.c|RXN-2602.c	R_R02593_c	R02593_c
rxn01887_w0	(1) Coniferyl alcohol[w0] + (1) NADP+[w0] <=> (1) Coniferyl aldehyde[w0] + (1) H+[w0] + (1) NADPH[w0]	RXN-11654.c|RXN-2602.c	R_R02593_c	R02593_c
rxn01888_c0	(1) Coniferyl alcohol[c0] + (1) UDP-glucose[c0] <=> (1) Coniferin[c0] + (1) UDP[c0]	2.4.1.111-RXN.c.araexp.CPD-12575		R02594_c
rxn01909_c0	(1) Diphosphate[c0] + (1) UDP-D-galacturonate[c0] <=> (1) 1-Phospho-alpha-D-galacturonate[c0] + (1) UTP[c0]	RXN-3.c
rxn01917_c0	(1) ATP[c0] + (1) N-Acetyl-L-glutamate[c0] <=> (1) ADP[c0] + (1) N-Acetyl-L-glutamate 5-phosphate[c0]	ACETYLGLUTKIN-RXN.c	R_R02649_c	R02649_c
rxn01923_c0	(2) 2-Methylpropanoyl-CoA[c0] + (1) Oxygen[c0] => (2) 2-Methylprop-2-enoyl-CoA[c0] + (2) H2O[c0]
rxn01964_c0	(1) Indoleglycerol phosphate[c0] + (1) L-Serine[c0] <=> (1) D-Glyceraldehyde 3-phosphate[c0] + (1) H2O[c0] + (1) L-Tryptophan[c0]		R_R02722_c	R02722_c
rxn01966_c0	(1) Orthophosphate[c0] + (1) alpha,alpha-Trehalose[c0] => (1) D-Glucose[c0] + (1) beta-D-Glucose 1-phosphate[c0]
rxn01971_c0	(1) ATP[c0] + (1) beta-D-Fructose 6-phosphate[c0] => (1) ADP[c0] + (1) H+[c0] + (1) beta-D-Fructose 2,6-bisphosphate[c0]	6-PHOSPHOFRUCTO-2-KINASE-RXN.c	R_R02732_c	R02732_c
rxn01974_c0	(1) LL-2,6-Diaminoheptanedioate[c0] <=> (1) meso-2,6-Diaminoheptanedioate[c0]	DIAMINOPIMEPIM-RXN.c	R_R02735_c	R02735_c
rxn01975_c0	(1) NADP+[c0] + (1) beta-D-Glucose 6-phosphate[c0] <=> (1) D-Glucono-1,5-lactone 6-phosphate[c0] + (1) H+[c0] + (1) NADPH[c0]	GLU6PDEHYDROG-RXN.c	R_R02736_c	R02736_c
rxn01977_c0	(1) alpha-D-Glucose 6-phosphate[c0] <=> (1) beta-D-Glucose 6-phosphate[c0]	GLUCOSE-6-PHOSPHATE-1-EPIMERASE-RXN.c	R_R02739_c	R02739_c
rxn01981_c0	(1) gamma-L-Glutamyl-L-cysteine[c0] => (1) L-Cysteine[c0] + (1) Pidolic acid[c0]
rxn01991_c0	(1) H2O[c0] + (1) NADP+[c0] + (1) meso-2,6-Diaminoheptanedioate[c0] <= (1) H+[c0] + (1) L-2-Amino-6-oxoheptanedioate[c0] + (1) NADPH[c0] + (1) NH3[c0]
rxn02004_c0	(1) H2O[c0] + (1) alpha,alpha'-Trehalose 6-phosphate[c0] <=> (1) Orthophosphate[c0] + (1) alpha,alpha-Trehalose[c0]		R_R02778_c	R02778_c
rxn02034_c0	(1) Cortisol[c0] + (1) NAD+[c0] <= (1) Cortisone[c0] + (1) H+[c0] + (1) NADH[c0]		R_R02834_c	R02834_c
rxn02035_c0	(1) Cortisol[c0] + (1) NADP+[c0] <=> (1) Cortisone[c0] + (1) H+[c0] + (1) NADPH[c0]	RXN-12085.c		R02836_c
rxn02061_c0	(1) S-Adenosylmethioninamine[c0] + (1) Spermidine[c0] <=> (1) 5'-Methylthioadenosine[c0] + (1) H+[c0] + (1) Spermine[c0]	SPERMINE-SYNTHASE-RXN.c	R_R02869_c	R02869_c
rxn02062_c0	(1) NADPH[c0] + (1) Presqualene diphosphate[c0] => (1) Diphosphate[c0] + (1) NADP+[c0] + (1) Squalene[c0]	RXN66-281.c|RXN66-281.c.araexp.NADP_NADPH	R_R02872_c	R02872_c
rxn02063_c0	(1) H+[c0] + (1) NADPH[c0] + (1) Oxygen[c0] + (1) Squalene[c0] => (1) (S)-2,3-Epoxysqualene[c0] + (1) H2O[c0] + (1) NADP+[c0]	RXN66-282.c|SQUALENE-MONOOXYGENASE-RXN.c	R_R02874_c	R02874_c
rxn02133_c0	(1) ATP[c0] + (1) Sphinganine[c0] => (1) ADP[c0] + (1) H+[c0] + (1) Sphinganine 1-phosphate[c0]	RXN-11376.c.araexp.CPD-13612_CPD-649|SPHINGANINE-KINASE-RXN.c
rxn02149_c0	(1) Chlorogenate[c0] + (1) H2O[c0] => (1) Caffeate[c0] + (1) H+[c0] + (1) Quinate[c0]
rxn02155_c0	(1) ATP[c0] + (1) Nicotinate D-ribonucleotide[c0] <=> (1) Deamino-NAD+[c0] + (1) Diphosphate[c0]	NICONUCADENYLYLTRAN-RXN.c
rxn02159_c0	(1) L-Histidinol[c0] + (1) NAD+[c0] <=> (1) H+[c0] + (1) L-Histidinal[c0] + (1) NADH[c0]	HISTOLDEHYD-RXN.c	R_R03012_c	R03012_c
rxn02160_c0	(1) H2O[c0] + (1) L-Histidinol phosphate[c0] => (1) L-Histidinol[c0] + (1) Orthophosphate[c0]		R_R03013_c	R03013_c
rxn02166_c0	(1) 4-Nitrophenyl phosphate[c0] + (1) H2O[c0] <=> (1) 4-Nitrophenol[c0] + (1) Orthophosphate[c0]	4-NITROPHENYLPHOSPHATASE-RXN.c	R_R03024_c	R03024_c
rxn02175_c0	(1) ATP[c0] + (1) Pantetheine 4'-phosphate[c0] <=> (1) Dephospho-CoA[c0] + (1) Diphosphate[c0]	PANTEPADENYLYLTRAN-RXN.c
rxn02189_c0	(1) Cinnamaldehyde[c0] + (1) H+[c0] + (1) NADPH[c0] <=> (1) Cinnamyl alcohol[c0] + (1) NADP+[c0]	CINNAMYL-ALCOHOL-DEHYDROGENASE-RXN.c
rxn02200_c0	(1) 2-Amino-4-hydroxy-6-hydroxymethyl-7,8-dihydropteridine[c0] + (1) 4-Aminobenzoate[c0] <= (1) Dihydropteroate[c0] + (1) H2O[c0]
rxn02201_c0	(1) 2-Amino-7,8-dihydro-4-hydroxy-6-(diphosphooxymethyl)pteridine[c0] + (1) 4-Aminobenzoate[c0] => (1) Dihydropteroate[c0] + (1) Diphosphate[c0] + (1) H+[c0]	H2PTEROATESYNTH-RXN.c	R_R03066_c|R_R03067_c	R03066_c|R03067_c
rxn02212_c0	(1) 2-Dehydro-3-deoxy-D-arabino-heptonate 7-phosphate[c0] => (1) 3-Dehydroquinate[c0] + (1) Orthophosphate[c0]	3-DEHYDROQUINATE-SYNTHASE-RXN.c	R_R03083_c	R03083_c
rxn02213_c0	(1) 3-Dehydroquinate[c0] => (1) 3-Dehydroshikimate[c0] + (1) H2O[c0]	3-DEHYDROQUINATE-DEHYDRATASE-RXN.c	R_R03084_c	R03084_c
rxn02219_c0	(1) 3-Indoleacetonitrile[c0] + (2) H2O[c0] <=> (1) Indole-3-acetate[c0] + (1) NH3[c0]	RXN-1404.c	R_R03093_c	R03093_c
rxn02219_n0	(1) 3-Indoleacetonitrile[n0] + (2) H2O[n0] <=> (1) Indole-3-acetate[n0] + (1) NH3[n0]	RXN-1404.c	R_R03093_c	R03093_c
rxn02220_c0	(1) H+[c0] + (1) Indole-3-acetate[c0] + (1) UDP-glucose[c0] => (1) Indole-3-acetyl-beta-1-D-glucoside[c0] + (1) UDP[c0]	2.4.1.121-RXN.c.araexp.CPD-12575		R03094_c
rxn02222_c0	(1) (Indol-3-yl)acetamide[c0] + (1) H2O[c0] => (1) Indole-3-acetate[c0] + (1) NH3[c0]	RXNN-404.c
rxn02222_n0	(1) (Indol-3-yl)acetamide[n0] + (1) H2O[n0] => (1) Indole-3-acetate[n0] + (1) NH3[n0]	RXNN-404.c
rxn02229_c0	(1) Mercaptopyruvate[c0] + (1) Sulfite[c0] <= (1) Pyruvate[c0] + (1) Thiosulfate[c0]
rxn02230_c0	(1) Hydrogen cyanide[c0] + (1) Mercaptopyruvate[c0] <=> (1) H+[c0] + (1) Pyruvate[c0] + (1) Thiocyanate[c0]	MERCAPYSTRANS-RXN.c
rxn02230_n0	(1) Hydrogen cyanide[n0] + (1) Mercaptopyruvate[n0] <=> (1) H+[n0] + (1) Pyruvate[n0] + (1) Thiocyanate[n0]	MERCAPYSTRANS-RXN.c
rxn02239_c0	(1) Dihydrokaempferol[c0] + (1) H+[c0] + (1) NADPH[c0] + (1) Oxygen[c0] <=> (1) H2O[c0] + (1) NADP+[c0] + (1) Taxifolin[c0]	RXN-525.c	R_R03124_c	R03124_c
rxn02241_c0	(1) 2-Oxoglutarate[c0] + (1) Dihydrokaempferol[c0] + (1) Oxygen[c0] => (1) CO2[c0] + (1) H+[c0] + (1) H2O[c0] + (1) Kaempferol[c0] + (1) Succinate[c0]	RXN1F-93.c	R_R03126_c	R03126_c
rxn02251_c0	(1) D-Ribulose 1,5-bisphosphate[c0] + (1) Oxygen[c0] => (1) 2-Phosphoglycolate[c0] + (1) 3-Phospho-D-glycerate[c0] + (2) H+[c0]	CBBLSSYN-RXN.c
rxn02262_c0	(1) 6-Deoxy-L-galactose[c0] + (1) ATP[c0] <= (1) ADP[c0] + (1) H+[c0] + (1) L-Fucose 1-phosphate[c0]
rxn02264_c0	(1) Hydroxymethylbilane[c0] <=> (1) H2O[c0] + (1) Uroporphyrinogen III[c0]	UROGENIIISYN-RXN.c	R_R03165_c	R03165_c
rxn02277_c0	(1) 7,8-Diaminononanoate[c0] + (1) ATP[c0] + (1) CO2[c0] => (1) ADP[c0] + (1) Dethiobiotin[c0] + (3) H+[c0] + (1) Orthophosphate[c0]	DETHIOBIOTIN-SYN-RXN.c	R_R03182_c	R03182_c
rxn02287_c0	(2) S-Adenosyl-L-methionine[c0] + (1) Uroporphyrinogen III[c0] <= (1) H+[c0] + (1) Precorrin 2[c0] + (2) S-Adenosyl-L-homocysteine[c0]	RXN-13403.c	R_R03194_c	R03194_c
rxn02288_c0	(4) H+[c0] + (1) Uroporphyrinogen III[c0] => (4) CO2[c0] + (1) Coproporphyrinogen III[c0]	UROGENDECARBOX-RXN.c	R_R03197_c	R03197_c
rxn02290_c0	(1) (S)-2,3-Epoxysqualene[c0] => (1) Lanosterol[c0]	LANOSTEROL-SYNTHASE-RXN.c	R_R03199_c	R03199_c
rxn02291_c0	(1) (S)-2,3-Epoxysqualene[c0] <=> (1) Cycloartenol[c0]	CYCLOARTENOL-SYNTHASE-RXN.c	R_R03200_c	R03200_c
rxn02297_c0	(1) 6-Carboxyhexanoyl-CoA[c0] + (1) H+[c0] + (1) L-Alanine[c0] => (1) 8-Amino-7-oxononanoate[c0] + (1) CO2[c0] + (1) CoA[c0]	7KAPSYN-RXN.c	R_R03210_c	R03210_c
rxn02299_c0	(1) H+[c0] + (1) Phenylacetothiohydroximate[c0] + (1) UDP-glucose[c0] => (1) Desulfoglucotropeolin[c0] + (1) UDP[c0]	2.4.1.195-RXN.c.araexp.CPD-12575|RXN-4605.c.araexp.CPD-12575		R03213_c
rxn02300_c0	(1) 3'-Phosphoadenylyl sulfate[c0] + (1) Desulfoglucotropeolin[c0] => (1) Adenosine 3',5'-bisphosphate[c0] + (1) Glucotropaeolin[c0] + (1) H+[c0]	RXN-4606.c
rxn02303_c0	(1) Coproporphyrinogen III[c0] + (2) H+[c0] + (1) Oxygen[c0] => (2) CO2[c0] + (2) H2O[c0] + (1) Protoporphyrinogen IX[c0]	RXN0-1461.c	R_R03220_c	R03220_c
rxn02304_c0	(3) Oxygen[c0] + (1) Protoporphyrinogen IX[c0] <=> (3) Hydrogen peroxide[c0] + (1) Protoporphyrin[c0]	PROTOPORGENOXI-RXN.c
rxn02312_c0	(1) 8-Amino-7-oxononanoate[c0] + (1) S-Adenosyl-L-methionine[c0] <=> (1) 7,8-Diaminononanoate[c0] + (1) S-Adenosyl-4-methylthio-2-oxobutanoate[c0]	DAPASYN-RXN.c	R_R03231_c	R03231_c
rxn02320_c0	(1) 2-Oxoglutarate[c0] + (1) L-Histidinol phosphate[c0] <=> (1) 3-(Imidazol-4-yl)-2-oxopropyl phosphate[c0] + (1) L-Glutamate[c0]	HISTAMINOTRANS-RXN.c	R_R03243_c	R03243_c
rxn02322_c0	(1) (R)-5-Phosphomevalonate[c0] + (1) ATP[c0] + (1) H+[c0] <=> (1) (R)-5-Diphosphomevalonate[c0] + (1) ADP[c0]	PHOSPHOMEVALONATE-KINASE-RXN.c	R_R03245_c	R03245_c
rxn02324_c0	(1) Gallate[c0] + (1) H+[c0] => (1) 1,2,3-Trihydroxybenzene[c0] + (1) CO2[c0]
rxn02331_c0	(1) 3-Deoxy-D-manno-octulosonate 8-phosphate[c0] + (1) Orthophosphate[c0] <= (1) D-Arabinose 5-phosphate[c0] + (1) H2O[c0] + (1) Phosphoenolpyruvate[c0]	KDO-8PSYNTH-RXN.c	R_R03254_c	R03254_c
rxn02341_c0	(1) (R)-4'-Phosphopantothenoyl-L-cysteine[c0] + (1) H+[c0] => (1) CO2[c0] + (1) Pantetheine 4'-phosphate[c0]	P-PANTOCYSDECARB-RXN.c	R_R03269_c	R03269_c
rxn02373_c0	(1) L-Glutamate 5-semialdehyde[c0] + (1) NADP+[c0] + (1) Orthophosphate[c0] <=> (1) H+[c0] + (1) L-Glutamyl 5-phosphate[c0] + (1) NADPH[c0]	GLUTSEMIALDEHYDROG-RXN.c	R_R03313_c	R03313_c
rxn02374_c0	(1) L-Glutamate 5-semialdehyde[c0] => (1) (S)-1-Pyrroline-5-carboxylate[c0] + (1) H+[c0] + (1) H2O[c0]	SPONTPRO-RXN.c
rxn02380_c0	(1) beta-D-Glucose 6-phosphate[c0] <=> (1) beta-D-Fructose 6-phosphate[c0]	PGLUCISOM-RXN.c	R_R03321_c	R03321_c
rxn02402_c0	(1) CO2[c0] + (1) Diphosphate[c0] + (1) Nicotinate D-ribonucleotide[c0] <= (1) 5-Phospho-alpha-D-ribose 1-diphosphate[c0] + (1) H+[c0] + (1) Quinolinate[c0]	QUINOPRIBOTRANS-RXN.c	R_R03348_c	R03348_c
rxn02404_c0	(1) 3-Deoxy-D-manno-octulosonate 8-phosphate[c0] + (1) H2O[c0] => (1) 3-Deoxy-D-manno-octulosonate[c0] + (1) Orthophosphate[c0]	KDO-8PPHOSPHAT-RXN.c	R_R03350_c	R03350_c
rxn02405_c0	(1) 3-Deoxy-D-manno-octulosonate[c0] + (1) CTP[c0] => (1) CMP-3-deoxy-D-manno-octulosonate[c0] + (1) Diphosphate[c0] + (1) H+[c0]	CPM-KDOSYNTH-RXN.c	R_R03351_c	R03351_c
rxn02405_m0	(1) 3-Deoxy-D-manno-octulosonate[m0] + (1) CTP[m0] => (1) CMP-3-deoxy-D-manno-octulosonate[m0] + (1) Diphosphate[m0] + (1) H+[m0]	CPM-KDOSYNTH-RXN.c	R_R03351_c	R03351_c
rxn02414_c0	(1) Caffeate[c0] + (1) S-Adenosyl-L-methionine[c0] <=> (1) Ferulate[c0] + (1) H+[c0] + (1) S-Adenosyl-L-homocysteine[c0]	CAFFEATE-O-METHYLTRANSFERASE-RXN.c|RXN-1104.c	R_R03366_c	R03366_c
rxn02414_n0	(1) Caffeate[n0] + (1) S-Adenosyl-L-methionine[n0] <=> (1) Ferulate[n0] + (1) H+[n0] + (1) S-Adenosyl-L-homocysteine[n0]	CAFFEATE-O-METHYLTRANSFERASE-RXN.c|RXN-1104.c	R_R03366_c	R03366_c
rxn02417_c0	(1) H2O[c0] + (1) Phytic acid[c0] => (1) D-myo-Inositol 1,2,4,5,6-pentakisphosphate[c0] + (1) Orthophosphate[c0]	RXN-10943.c|RXN-7920.c.araexp.CPD-534
rxn02435_c0	(1) D-myo-Inositol 1,4,5-trisphosphate[c0] + (1) H2O[c0] <=> (1) 1D-myo-Inositol 1,4-bisphosphate[c0] + (1) Orthophosphate[c0]	3.1.3.56-RXN.c
rxn02441_c0	(1) 8-[(1R,2R)-3-Oxo-2-{(Z)-pent-2-enyl}cyclopentyl]octanoate[c0] + (1) NADP+[c0] <=> (1) 12-OPDA[c0] + (1) H+[c0] + (1) NADPH[c0]	12-OXOPHYTODIENOATE-REDUCTASE-RXN.c
rxn02441_x0	(1) 8-[(1R,2R)-3-Oxo-2-{(Z)-pent-2-enyl}cyclopentyl]octanoate[x0] + (1) NADP+[x0] <=> (1) 12-OPDA[x0] + (1) H+[x0] + (1) NADPH[x0]	12-OXOPHYTODIENOATE-REDUCTASE-RXN.c
rxn02442_c0	(1) (9Z,15Z)-(13S)-12,13-Epoxyoctadeca-9,11,15-trienoic acid[c0] => (1) 12-OPDA[c0]	ALLENE-OXIDE-CYCLASE-RXN.c
rxn02451_c0	(1) Raffinose[c0] + (1) alpha-D-Galactosyl-(1->3)-1D-myo-inositol[c0] <=> (1) Stachyose[c0] + (1) myo-Inositol[c0]	2.4.1.67-RXN.c	R_R03418_c	R03418_c|R06042_c
rxn02456_c0	(1) 1D-myo-Inositol 1,3,4-trisphosphate[c0] + (1) ATP[c0] => (1) 1D-myo-Inositol 1,3,4,5-tetrakisphosphate[c0] + (1) ADP[c0] + (1) H+[c0]	2.7.1.139-RXN.c
rxn02457_c0	(1) 1D-myo-Inositol 1,3,4-trisphosphate[c0] + (1) ATP[c0] => (1) 1D-myo-Inositol 1,3,4,6-tetrakisphosphate[c0] + (1) ADP[c0] + (1) H+[c0]	2.7.1.133-RXN.c
rxn02458_c0	(1) 1D-myo-Inositol 1,3,4,5-tetrakisphosphate[c0] + (1) H2O[c0] <=> (1) 1D-myo-Inositol 1,3,4-trisphosphate[c0] + (1) Orthophosphate[c0]	RXN-8730.c
rxn02465_c0	(1) N-Acetyl-L-glutamate 5-semialdehyde[c0] + (1) NADP+[c0] + (1) Orthophosphate[c0] <=> (1) H+[c0] + (1) N-Acetyl-L-glutamate 5-phosphate[c0] + (1) NADPH[c0]	N-ACETYLGLUTPREDUCT-RXN.c	R_R03443_c	R03443_c
rxn02473_c0	(1) D-erythro-1-(Imidazol-4-yl)glycerol 3-phosphate[c0] => (1) 3-(Imidazol-4-yl)-2-oxopropyl phosphate[c0] + (1) H2O[c0]	IMIDPHOSDEHYD-RXN.c	R_R03457_c	R03457_c
rxn02474_c0	(1) 5-Amino-6-(5'-phospho-D-ribitylamino)uracil[c0] + (1) NADP+[c0] <=> (1) 5-Amino-6-(5'-phosphoribosylamino)uracil[c0] + (1) H+[c0] + (1) NADPH[c0]	RIBOFLAVINSYNREDUC-RXN.c	R_R03458_c	R03458_c
rxn02475_c0	(1) 2,5-Diamino-6-(5-phospho-D-ribosylamino)pyrimidin-4(3H)-one[c0] + (1) H+[c0] + (1) H2O[c0] => (1) 5-Amino-6-(5'-phosphoribosylamino)uracil[c0] + (1) NH3[c0]	RIBOFLAVINSYNDEAM-RXN.c	R_R03459_c	R03459_c
rxn02476_c0	(1) Phosphoenolpyruvate[c0] + (1) Shikimate 3-phosphate[c0] <=> (1) 5-O-(1-Carboxyvinyl)-3-phosphoshikimate[c0] + (1) Orthophosphate[c0]	2.5.1.19-RXN.c	R_R03460_c	R03460_c
rxn02489_c0	(1) 1D-myo-Inositol 1,3,4,6-tetrakisphosphate[c0] + (1) ATP[c0] => (1) 1D-myo-Inositol 1,3,4,5,6-pentakisphosphate[c0] + (1) ADP[c0] + (1) H+[c0]	2.7.1.140-RXN.c
rxn02503_c0	(1) 2-Amino-4-hydroxy-6-hydroxymethyl-7,8-dihydropteridine[c0] + (1) ATP[c0] => (1) 2-Amino-7,8-dihydro-4-hydroxy-6-(diphosphooxymethyl)pteridine[c0] + (1) AMP[c0] + (1) H+[c0]	H2PTERIDINEPYROPHOSPHOKIN-RXN.c	R_R03503_c	R03503_c
rxn02504_c0	(1) 2-Amino-4-hydroxy-6-(D-erythro-1,2,3-trihydroxypropyl)-7,8-dihydropteridine[c0] <= (1) 2-Amino-4-hydroxy-6-hydroxymethyl-7,8-dihydropteridine[c0] + (1) Glycolaldehyde[c0]	H2NEOPTERINALDOL-RXN.c	R_R03504_c	R03504_c
rxn02507_c0	(1) 1-(2-Carboxyphenylamino)-1-deoxy-D-ribulose 5-phosphate[c0] + (1) H+[c0] => (1) CO2[c0] + (1) H2O[c0] + (1) Indoleglycerol phosphate[c0]	IGPSYN-RXN.c	R_R03508_c	R03508_c
rxn02508_c0	(1) N-(5-Phospho-D-ribosyl)anthranilate[c0] => (1) 1-(2-Carboxyphenylamino)-1-deoxy-D-ribulose 5-phosphate[c0]		R_R03509_c	R03509_c
rxn02516_c0	(1) Hydrogen cyanide[c0] + (1) L-Cysteine[c0] <=> (1) 3-Cyano-L-alanine[c0] + (1) H+[c0] + (1) Hydrogen sulfide[c0]	L-3-CYANOALANINE-SYNTHASE-RXN.c		R03524_c
rxn02529_c0	(1) Cyanate[c0] + (1) H+[c0] + (1) HCO3-[c0] <=> (1) CO2[c0] + (1) Carbamate[c0]	R524-RXN.c	R_R03546_c	R03546_c
rxn02554_c0	(1) Ferulate[c0] + (1) H+[c0] + (1) NADPH[c0] + (1) Oxygen[c0] => (1) 5-Hydroxyferulic acid methyl ester[c0] + (1) H2O[c0] + (1) NADP+[c0]	RXN-1121.c	R_R07440_c	R07440_c
rxn02575_c0	(1) Sinapyl alcohol[c0] + (1) UDP-glucose[c0] <=> (1) Syringin[c0] + (1) UDP[c0]	RXN-90.c.araexp.CPD-12575		R03605_c
rxn02598_c0	(1) Leucocyanidin[c0] + (1) NADP+[c0] <=> (1) H+[c0] + (1) NADPH[c0] + (1) Taxifolin[c0]	RXN-600.c	R_R03636_c	R03636_c
rxn02602_c0	(1) 2-Oxoglutarate[c0] + (1) Eriodictyol[c0] + (1) Oxygen[c0] => (1) CO2[c0] + (1) Succinate[c0] + (1) Taxifolin[c0]	RXN-7775.c	R_R03640_c	R03640_c
rxn02677_c0	(1) Cycloeucalenol[c0] <=> (1) Obtusifoliol[c0]	CYCLOEUCALENOL-CYCLOISOMERASE-RXN.c		R03775_c
rxn02697_c0	(1) 2-Oxoglutarate[c0] + (1) Gibberellin A44 diacid[c0] + (1) Oxygen[c0] => (1) CO2[c0] + (1) Gibberellin A19[c0] + (1) H2O[c0] + (1) Succinate[c0]	RXN1F-168.c	R_R03806_c	R03806_c
rxn02699_c0	(1) 2-Oxoglutarate[c0] + (1) Gibberellin A20[c0] + (1) Oxygen[c0] => (1) CO2[c0] + (1) Gibberellin A29[c0] + (1) Succinate[c0]	RXN-113.c	R_R03809_c	R03809_c
rxn02735_c0	(1) NADP+[c0] + (1) UDP-L-rhamnose[c0] <=> (1) H+[c0] + (1) NADPH[c0] + (1) UDP-4-dehydro-6-deoxy-D-glucose[c0]	RXN-5481.c
rxn02758_c0	(1) NADP+[c0] + (1) Sinapyl alcohol[c0] <=> (1) H+[c0] + (1) NADPH[c0] + (1) Sinapoyl aldehyde[c0]	RXN-1125.c	R_R03918_c	R03918_c
rxn02758_w0	(1) NADP+[w0] + (1) Sinapyl alcohol[w0] <=> (1) H+[w0] + (1) NADPH[w0] + (1) Sinapoyl aldehyde[w0]	RXN-1125.c	R_R03918_c	R03918_c
rxn02789_c0	(1) alpha-Isopropylmalate[c0] <=> (1) 2-Isopropylmaleate[c0] + (1) H2O[c0]	3-ISOPROPYLMALISOM-RXN.c	R_R03968_c	R03968_c
rxn02811_c0	(1) (2R,3S)-3-Isopropylmalate[c0] <=> (1) 2-Isopropylmaleate[c0] + (1) H2O[c0]	RXN-8991.c	R_R04001_c	R04001_c
rxn02814_c0	(1) 4-Hydroxycinnamyl aldehyde[c0] + (1) H+[c0] + (1) NADPH[c0] <=> (1) 4-Coumaryl alcohol[c0] + (1) NADP+[c0]	RXN-1102.c	R_R04004_c|R_R07437_c	R04004_c|R07437_c
rxn02814_w0	(1) 4-Hydroxycinnamyl aldehyde[w0] + (1) H+[w0] + (1) NADPH[w0] <=> (1) 4-Coumaryl alcohol[w0] + (1) NADP+[w0]	RXN-1102.c	R_R04004_c|R_R07437_c	R04004_c|R07437_c
rxn02823_c0	(1) (Indol-3-yl)acetamide[c0] <=> (1) 3-Indoleacetonitrile[c0] + (1) H2O[c0]	RXN-7567.c
rxn02823_n0	(1) (Indol-3-yl)acetamide[n0] <=> (1) 3-Indoleacetonitrile[n0] + (1) H2O[n0]	RXN-7567.c
rxn02831_c0	(1) 2-Succinylbenzoate[c0] + (1) ATP[c0] + (1) CoA[c0] => (1) 2-Succinylbenzoyl-CoA[c0] + (1) AMP[c0] + (1) Diphosphate[c0] + (1) H+[c0]	O-SUCCINYLBENZOATE-COA-LIG-RXN.c
rxn02831_d0	(1) 2-Succinylbenzoate[d0] + (1) ATP[d0] + (1) CoA[d0] => (1) 2-Succinylbenzoyl-CoA[d0] + (1) AMP[d0] + (1) Diphosphate[d0] + (1) H+[d0]	O-SUCCINYLBENZOATE-COA-LIG-RXN.c
rxn02831_x0	(1) 2-Succinylbenzoate[x0] + (1) ATP[x0] + (1) CoA[x0] => (1) 2-Succinylbenzoyl-CoA[x0] + (1) AMP[x0] + (1) Diphosphate[x0] + (1) H+[x0]	O-SUCCINYLBENZOATE-COA-LIG-RXN.c
rxn02832_c0	(1) 2-Succinylbenzoate[c0] + (1) H2O[c0] <= (1) (1R,6R)-6-Hydroxy-2-succinylcyclohexa-2,4-diene-1-carboxylate[c0]	O-SUCCINYLBENZOATE-COA-SYN-RXN.c
rxn02834_c0	(1) 1-(5-Phospho-D-ribosyl)-ATP[c0] + (1) H2O[c0] => (1) Diphosphate[c0] + (2) H+[c0] + (1) Phosphoribosyl-AMP[c0]	HISTPRATPHYD-RXN.c	R_R04035_c	R04035_c
rxn02835_c0	(1) H2O[c0] + (1) Phosphoribosyl-AMP[c0] <=> (1) 5-(5-Phospho-D-ribosylaminoformimino)-1-(5-phosphoribosyl)-imidazole-4-carboxamide[c0]	HISTCYCLOHYD-RXN.c	R_R04037_c	R04037_c
rxn02894_c0	(1) 5-Methylthio-D-ribose[c0] + (1) ATP[c0] => (1) ADP[c0] + (1) H+[c0] + (1) S-Methyl-5-thio-D-ribose 1-phosphate[c0]	5-METHYLTHIORIBOSE-KINASE-RXN.c
rxn02895_c0	(1) 5-Phosphoribosylamine[c0] + (1) ATP[c0] + (1) Glycine[c0] => (1) 5'-Phosphoribosylglycinamide[c0] + (1) ADP[c0] + (1) H+[c0] + (1) Orthophosphate[c0]	GLYRIBONUCSYN-RXN.c	R_R04144_c	R04144_c
rxn02914_c0	(1) 2-Oxoglutarate[c0] + (1) O-Phospho-L-serine[c0] <=> (1) 3-Phosphonooxypyruvate[c0] + (1) L-Glutamate[c0]	PSERTRANSAM-RXN.c	R_R04173_c	R04173_c
rxn02928_c0	(1) 2,3,4,5-Tetrahydrodipicolinate[c0] + (1) NAD+[c0] <=> (1) H+[c0] + (1) L-2,3-Dihydrodipicolinate[c0] + (1) NADH[c0]	DIHYDROPICRED-RXN.c.araexp.NAD_NADH	R_R04198_c	R04198_c
rxn02929_c0	(1) 2,3,4,5-Tetrahydrodipicolinate[c0] + (1) NADP+[c0] <=> (1) H+[c0] + (1) L-2,3-Dihydrodipicolinate[c0] + (1) NADPH[c0]	DIHYDROPICRED-RXN.c.araexp.NADP_NADPH		R04199_c
rxn02937_c0	(1) 2-(Formamido)-N1-(5'-phosphoribosyl)acetamidine[c0] + (1) ATP[c0] <=> (1) ADP[c0] + (1) Aminoimidazole ribotide[c0] + (1) H+[c0] + (1) Orthophosphate[c0]	AIRS-RXN.c	R_R04208_c	R04208_c
rxn02938_c0	(1) 1-(5-Phospho-D-ribosyl)-5-amino-4-imidazolecarboxylate[c0] + (1) H+[c0] <=> (1) Aminoimidazole ribotide[c0] + (1) CO2[c0]	AIRCARBOXY-RXN.c	R_R04209_c	R04209_c
rxn02945_c0	(1) Prephytoene diphosphate[c0] <=> (1) 15-cis-Phytoene[c0] + (1) Diphosphate[c0] + (1) H+[c0]	RXNARA-8002.c
rxn02959_c0	(1) Magnesium protoporphyrin[c0] + (1) S-Adenosyl-L-methionine[c0] <=> (1) Magnesium protoporphyrin monomethyl ester[c0] + (1) S-Adenosyl-L-homocysteine[c0]	RXN-MG-PROTOPORPHYRIN-METHYLESTER-SYN.c	R_R04237_c	R04237_c
rxn02977_c0	(1) H2O[c0] + (1) Methyl-2-alpha-L-fucopyranosyl-beta-D-galactoside[c0] <= (1) 6-Deoxy-L-galactose[c0] + (1) Methyl beta-D-galactoside[c0]
rxn02979_c0	(1) 2-Oxoglutarate[c0] + (1) Oxygen[c0] + (1) cis-3,4-Leucopelargonidin[c0] <=> (1) CO2[c0] + (1) H+[c0] + (2) H2O[c0] + (1) Pelargonidin[c0] + (1) Succinate[c0]	LEUCPEL-RXN.c	R_R04276_c	R04276_c
rxn02988_c0	(2) H2O[c0] + (1) Orthophosphate[c0] + (1) Quinolinate[c0] <=> (1) Glycerone phosphate[c0] + (1) Iminoaspartate[c0]	QUINOLINATE-SYNTHA-RXN.c	R_R04292_c	R04292_c
rxn03004_c0	(1) 10-Formyltetrahydrofolate[c0] + (1) 5'-Phosphoribosylglycinamide[c0] <=> (1) 5'-Phosphoribosyl-N-formylglycinamide[c0] + (1) H+[c0] + (1) Tetrahydrofolate[c0]	GART-RXN.c		R04325_c
rxn03012_c0	(1) L-2-Amino-6-oxoheptanedioate[c0] <=> (1) 2,3,4,5-Tetrahydrodipicolinate[c0] + (1) H+[c0] + (1) H2O[c0]	RXN-4821.c
rxn03016_c0	(1) H+[c0] + (1) NADPH[c0] + (1) Oxygen[c0] + (1) p-Coumaroyl quinic acid[c0] => (1) Chlorogenate[c0] + (1) H2O[c0] + (1) NADP+[c0]
rxn03057_c0	(1) S-Methyl-5-thio-D-ribose 1-phosphate[c0] <=> (1) S-Methyl-5-thio-D-ribulose 1-phosphate[c0]	5.3.1.23-RXN.c
rxn03062_c0	(1) (2R,3S)-3-Isopropylmalate[c0] + (1) NAD+[c0] <=> (1) (2S)-2-Isopropyl-3-oxosuccinate[c0] + (1) H+[c0] + (1) NADH[c0]	3-ISOPROPYLMALDEHYDROG-RXN.c	R_R04426_c	R04426_c
rxn03075_c0	(1) 5-(2-Hydroxyethyl)-4-methylthiazole[c0] + (1) ATP[c0] <=> (1) 4-Methyl-5-(2-phosphoethyl)-thiazole[c0] + (1) ADP[c0] + (1) H+[c0]	THIAZOLSYN3-RXN.c	R_R04448_c	R04448_c
rxn03080_c0	(1) 5-Amino-6-(1-D-ribitylamino)uracil[c0] + (1) L-3,4-Dihydroxybutan-2-one 4-phosphate[c0] <=> (1) 6,7-Dimethyl-8-(D-ribityl)lumazine[c0] + (1) H+[c0] + (2) H2O[c0] + (1) Orthophosphate[c0]	LUMAZINESYN-RXN.c	R_R04457_c	R04457_c
rxn03084_c0	(1) 5'-Phosphoribosyl-N-formylglycinamide[c0] + (1) ATP[c0] + (1) H2O[c0] + (1) L-Glutamine[c0] => (1) 2-(Formamido)-N1-(5'-phosphoribosyl)acetamidine[c0] + (1) ADP[c0] + (1) H+[c0] + (1) L-Glutamate[c0] + (1) Orthophosphate[c0]	FGAMSYN-RXN.c	R_R04463_c	R04463_c
rxn03093_c0	(1) 3beta-Hydroxy-4beta-methyl-5alpha-cholest-7-ene-4alpha-carboxylate[c0] + (1) NAD+[c0] => (1) 4alpha-Methyl-5alpha-cholest-7-en-3-one[c0] + (1) CO2[c0] + (1) NADH[c0]	1.1.1.170-RXN.c.araexp.NAD_NADH
rxn03130_c0	(1) H2O[c0] + (1) UDP-2,3-bis(3-hydroxytetradecanoyl)glucosamine[c0] => (2) H+[c0] + (1) Lipid X[c0] + (1) UMP[c0]	LIPIDXSYNTHESIS-RXN.c
rxn03135_c0	(1) L-Glutamine[c0] + (1) N-(5'-Phospho-D-1'-ribulosylformimino)-5-amino-1-(5''-phospho-D-ribosyl)-4-imidazolecarboxamide[c0] => (1) 1-(5'-Phosphoribosyl)-5-amino-4-imidazolecarboxamide[c0] + (1) D-erythro-1-(Imidazol-4-yl)glycerol 3-phosphate[c0] + (2) H+[c0] + (1) L-Glutamate[c0]	GLUTAMIDOTRANS-RXN.c	R_R04558_c	R04558_c
rxn03136_c0	(1) 1-(5'-Phosphoribosyl)-5-amino-4-(N-succinocarboxamide)-imidazole[c0] => (1) 1-(5'-Phosphoribosyl)-5-amino-4-imidazolecarboxamide[c0] + (1) Fumarate[c0]		R_R04559_c	R04559_c
rxn03137_c0	(1) 1-(5'-Phosphoribosyl)-5-amino-4-imidazolecarboxamide[c0] + (1) 10-Formyltetrahydrofolate[c0] => (1) 1-(5'-Phosphoribosyl)-5-formamido-4-imidazolecarboxamide[c0] + (1) Tetrahydrofolate[c0]	AICARTRANSFORM-RXN.c	R_R04560_c	R04560_c
rxn03146_c0	(1) H2O[c0] + (1) UDP-3-O-(3-hydroxytetradecanoyl)-N-acetylglucosamine[c0] <=> (1) Acetate[c0] + (1) UDP-3-O-(3-hydroxytetradecanoyl)-D-glucosamine[c0]	UDPACYLGLCNACDEACETYL-RXN.c
rxn03147_c0	(1) 1-(5-Phospho-D-ribosyl)-5-amino-4-imidazolecarboxylate[c0] + (1) ATP[c0] + (1) L-Aspartate[c0] => (1) 1-(5'-Phosphoribosyl)-5-amino-4-(N-succinocarboxamide)-imidazole[c0] + (1) ADP[c0] + (2) H+[c0] + (1) Orthophosphate[c0]		R_R04591_c	R04591_c
rxn03159_c0	(1) Lipid X[c0] + (1) UDP-2,3-bis(3-hydroxytetradecanoyl)glucosamine[c0] <=> (1) Lipid A disaccharide[c0] + (1) UDP[c0]	LIPIDADISACCHARIDESYNTH-RXN.c
rxn03168_c0	(1) 2-Amino-4-hydroxy-6-(D-erythro-1,2,3-trihydroxypropyl)-7,8-dihydropteridine[c0] + (1) Orthophosphate[c0] <= (1) Dihydroneopterin phosphate[c0] + (1) H2O[c0]	DIHYDRONEOPTERIN-MONO-P-DEPHOS-RXN.c	R_R04621_c	R04621_c
rxn03173_c0	(1) 7,8-Dihydroneopterin 3'-triphosphate[c0] + (1) H2O[c0] => (1) Dihydroneopterin phosphate[c0] + (1) Diphosphate[c0] + (2) H+[c0]	H2NEOPTERINP3PYROPHOSPHOHYDRO-RXN.c	R_R04638_c	R04638_c
rxn03175_c0	(1) 5-(5-Phospho-D-ribosylaminoformimino)-1-(5-phosphoribosyl)-imidazole-4-carboxamide[c0] + (1) H+[c0] <=> (1) N-(5'-Phospho-D-1'-ribulosylformimino)-5-amino-1-(5''-phospho-D-ribosyl)-4-imidazolecarboxamide[c0]	PRIBFAICARPISOM-RXN.c	R_R04640_c	R04640_c
rxn03181_c0	(1) ATP[c0] + (1) Lipid A disaccharide[c0] => (1) 2,3,2'3'-Tetrakis(3-hydroxytetradecanoyl)-D-glucosaminyl-1,6-beta-D-glucosamine 1,4'-bisphosphate[c0] + (1) ADP[c0] + (1) H+[c0]	TETRAACYLDISACC4KIN-RXN.c
rxn03182_c0	(1) 2,3,2'3'-Tetrakis(3-hydroxytetradecanoyl)-D-glucosaminyl-1,6-beta-D-glucosamine 1,4'-bisphosphate[c0] + (1) CMP-3-deoxy-D-manno-octulosonate[c0] => (1) 3-Deoxy-D-manno-octulosonyl-lipid IV(A)[c0] + (1) CMP[c0] + (1) H+[c0]	KDOTRANS-RXN.c	R_R04658_c	R04658_c
rxn03182_m0	(1) 2,3,2'3'-Tetrakis(3-hydroxytetradecanoyl)-D-glucosaminyl-1,6-beta-D-glucosamine 1,4'-bisphosphate[m0] + (1) CMP-3-deoxy-D-manno-octulosonate[m0] => (1) 3-Deoxy-D-manno-octulosonyl-lipid IV(A)[m0] + (1) CMP[m0] + (1) H+[m0]	KDOTRANS-RXN.c	R_R04658_c	R04658_c
rxn03224_c0	(1) 3-Hexaprenyl-4,5-dihydroxybenzoate[c0] + (1) S-Adenosyl-L-methionine[c0] <=> (1) 3-Hexaprenyl-4-hydroxy-5-methoxybenzoate[c0] + (1) H+[c0] + (1) S-Adenosyl-L-homocysteine[c0]	2.1.1.114-RXN.c|RXN-11757.c.araexp.3-HEXAPRENYL-4-HYDROXY-5-METHOXYBENZOATE_3-HEXAPRENYL-45-DIHYDROXYBENZOATE	R_R04711_c	R04711_c
rxn03265_c0	(1) L-Selenomethionine[c0] + (1) S-Adenosyl-L-methionine[c0] => (1) S-Adenosyl-L-homocysteine[c0] + (1) Se-Methylselenomethionine[c0]	RXN-11062.c	R_R04772_c	R04772_c
rxn03273_c0	(1) 3-Ketolactose[c0] + (1) H2O[c0] => (1) 3-Keto-beta-D-galactose[c0] + (1) beta-D-Glucose[c0]	KETOLACTOSE-RXN.c	R_R04783_c	R04783_c
rxn03275_c0	(1) Dehydroascorbate[c0] + (1) H2O[c0] <= (1) (4R,5S)-4,5,6-Trihydroxy-2,3-dioxohexanoate[c0]
rxn03373_c0	(1) ATP[c0] + (1) Selenate[c0] => (1) Adenylylselenate[c0] + (1) Diphosphate[c0] + (1) H+[c0]	RXN-12720.c	R_R04929_c	R04929_c
rxn03403_c0	(1) H+[c0] + (1) cis-2-Hydroxycinnamate[c0] => (1) Coumarin[c0] + (1) H2O[c0]	RXN-8037.c
rxn03411_c0	(1) CO2[c0] + (1) Cyanidin[c0] + (1) H+[c0] + (2) H2O[c0] + (1) Succinate[c0] <=> (1) 2-Oxoglutarate[c0] + (1) Leucocyanidin[c0] + (1) Oxygen[c0]	RXN-602.c	R_R05036_c	R05036_c
rxn03439_c0	(1) 3-Deoxy-D-manno-octulosonyl-lipid IV(A)[c0] + (1) CMP-3-deoxy-D-manno-octulosonate[c0] => (1) CMP[c0] + (1) Di[3-deoxy-D-manno-octulosonyl]-lipid IV(A)[c0] + (1) H+[c0]	KDOTRANS2-RXN.c	R_R05074_c	R05074_c
rxn03439_m0	(1) 3-Deoxy-D-manno-octulosonyl-lipid IV(A)[m0] + (1) CMP-3-deoxy-D-manno-octulosonate[m0] => (1) CMP[m0] + (1) Di[3-deoxy-D-manno-octulosonyl]-lipid IV(A)[m0] + (1) H+[m0]	KDOTRANS2-RXN.c	R_R05074_c	R05074_c
rxn03452_c0	(1) ent-Copalyl diphosphate[c0] <=> (1) Diphosphate[c0] + (1) H+[c0] + (1) ent-Kaurene[c0]	4.2.3.19-RXN.c	R_R05092_c	R05092_c
rxn03453_c0	(1) 2-Oxoglutarate[c0] + (1) Gibberellin A53[c0] + (1) Oxygen[c0] => (1) CO2[c0] + (1) Gibberellin A44 diacid[c0] + (1) Succinate[c0]	RXN1F-167.c	R_R05097_c	R05097_c
rxn03474_c0	(1) Codeinone[c0] <=> (1) Neopinone[c0]	RXN-8150.c
rxn03519_c0	(1) ADP[c0] + (1) H+[c0] + (1) Phytic acid[c0] <= (1) 1D-myo-Inositol 1,3,4,5,6-pentakisphosphate[c0] + (1) ATP[c0]	RXN-7163.c	R_R05202_c	R05202_c
rxn03646_c0	(1) Lycopene[c0] => (1) gamma-Carotene[c0]	RXN1F-150.c	R_R05341_c	R05341_c
rxn03653_c0	(1) CoA[c0] + (1) Ethylene oxide[c0] + (1) NAD+[c0] => (1) Acetyl-CoA[c0] + (1) H+[c0] + (1) NADH[c0]
rxn03744_c0	(1) Ethylene[c0] + (1) H+[c0] + (1) NADH[c0] + (1) Oxygen[c0] => (1) Ethylene oxide[c0] + (1) H2O[c0] + (1) NAD+[c0]
rxn03841_c0	(1) 4-Amino-4-deoxychorismate[c0] => (1) 4-Aminobenzoate[c0] + (1) H+[c0] + (1) Pyruvate[c0]		R_R05553_c	R05553_c
rxn03842_c0	(1) (S)-Ureidoglycine[c0] + (1) H2O[c0] => (1) (-)-Ureidoglycolate[c0] + (1) NH3[c0]	URUR-RXN.c
rxn03843_c0	(1) Isopentenyl diphosphate[c0] + (1) trans,trans-Farnesyl diphosphate[c0] => (1) Diphosphate[c0] + (1) H+[c0] + (1) trans,trans,cis-Geranylgeranyl diphosphate[c0]	RXN0-5180.c	R_R05555_c	R05555_c
rxn03874_c0	(1) Crotonoyl-CoA[c0] + (1) H2O[c0] <=> (1) 3-Hydroxybutanoyl-CoA[c0]	3-HYDROXBUTYRYL-COA-DEHYDRATASE-RXN.c|R9-RXN.c	R_R05595_c	R05595_c
rxn03895_c0	(1) Chlorophyll a[c0] + (1) H2O[c0] <=> (1) Chlorophyllide[c0] + (2) H+[c0] + (1) Phytol[c0]	RXN-7738.c	R_R05618_c	R05618_c
rxn03907_c0	(1) 2-C-Methyl-D-erythritol 4-phosphate[c0] + (1) CTP[c0] <=> (1) 4-(Cytidine 5'-diphospho)-2-C-methyl-D-erythritol[c0] + (1) Diphosphate[c0]	2.7.7.60-RXN.c
rxn03908_c0	(1) 4-(Cytidine 5'-diphospho)-2-C-methyl-D-erythritol[c0] + (1) ATP[c0] => (1) 2-Phospho-4-(cytidine 5'-diphospho)-2-C-methyl-D-erythritol[c0] + (1) ADP[c0] + (1) H+[c0]		R_R05634_c	R05634_c
rxn03909_c0	(1) D-Glyceraldehyde 3-phosphate[c0] + (1) H+[c0] + (1) Pyruvate[c0] => (1) 1-Deoxy-D-xylulose 5-phosphate[c0] + (1) CO2[c0]	DXS-RXN.c	R_R05636_c	R05636_c
rxn03910_c0	(1) 2-Phospho-4-(cytidine 5'-diphospho)-2-C-methyl-D-erythritol[c0] <=> (1) 2-C-Methyl-D-erythritol 2,4-cyclodiphosphate[c0] + (1) CMP[c0]	RXN0-302.c		R05637_c
rxn03958_c0	(1) 2-C-Methyl-D-erythritol 4-phosphate[c0] + (1) NADP+[c0] <= (1) 1-Deoxy-D-xylulose 5-phosphate[c0] + (1) H+[c0] + (1) NADPH[c0]		R_R05688_c	R05688_c
rxn03970_c0	(1) Coniferyl aldehyde[c0] + (1) H2O[c0] + (1) NAD+[c0] <=> (1) Ferulate[c0] + (2) H+[c0] + (1) NADH[c0]	RXN-1241.c.araexp.NAD_NADH
rxn03971_c0	(1) Coniferyl aldehyde[c0] + (1) H2O[c0] + (1) NADP+[c0] <=> (1) Ferulate[c0] + (2) H+[c0] + (1) NADPH[c0]	RXN-1241.c.araexp.NADP_NADPH
rxn03983_c0	(1) AMP[c0] + (1) Glutathione disulfide[c0] + (1) H+[c0] + (1) Sulfite[c0] <=> (1) Adenylyl sulfate[c0] + (2) Glutathione[c0]	1.8.4.9-RXN.c
rxn03989_c0	(1) 2-Oxoglutarate[c0] + (1) Leucocyanidin[c0] + (1) Oxygen[c0] => (1) CO2[c0] + (1) H2O[c0] + (1) Succinate[c0] + (1) Taxifolin[c0]		R_R05723_c	R05723_c
rxn03996_c0	(2) H+[c0] + (3) NADPH[c0] + (1) Obtusifoliol[c0] + (3) Oxygen[c0] => (1) 4alpha-Methyl-5alpha-ergosta-8,14,24(28)-trien-3beta-ol[c0] + (1) Formate[c0] + (4) H2O[c0] + (3) NADP+[c0]	1.14.13.70-RXN.c
rxn04012_c0	(1) (-)-Jasmonic acid[c0] + (1) S-Adenosyl-L-methionine[c0] <=> (1) Methyl jasmonate[c0] + (1) S-Adenosyl-L-homocysteine[c0]	RXN1F-28.c		R05759_c
rxn04018_c0	(1) Geranyl diphosphate[c0] <=> (1) (-)-alpha-Pinene[c0] + (1) Diphosphate[c0] + (1) H+[c0]	RXN-5106.c	R_R05765_c	R05765_c
rxn04019_c0	(1) Geranyl diphosphate[c0] <=> (1) (-)-beta-Pinene[c0] + (1) Diphosphate[c0] + (1) H+[c0]	RXN-5107.c	R_R05766_c	R05766_c
rxn04040_c0	(1) ATP[c0] + (1) D-myo-Inositol 1,4,5-trisphosphate[c0] => (1) 1D-myo-Inositol 1,4,5,6-tetrakisphosphate[c0] + (1) ADP[c0] + (1) H+[c0]	2.7.1.151-RXN.c
rxn04041_c0	(1) 1D-myo-Inositol 1,4,5,6-tetrakisphosphate[c0] + (1) ATP[c0] => (1) 1D-myo-Inositol 1,3,4,5,6-pentakisphosphate[c0] + (1) ADP[c0] + (1) H+[c0]	RXN-7162.c
rxn04059_c0	(1) 16-Epivellosimine[c0] <=> (1) Vellosimine[c0]	RXN-8225.c
rxn04113_c0	(1) 1-Hydroxy-2-methyl-2-butenyl 4-diphosphate[c0] + (1) H+[c0] + (1) NADPH[c0] => (1) H2O[c0] + (1) Isopentenyl diphosphate[c0] + (1) NADP+[c0]		R_R05884_c	R05884_c
rxn04136_c0	(1) Geranyl diphosphate[c0] => (1) Diphosphate[c0] + (1) H+[c0] + (1) d-Limonene[c0]	4.2.3.20-RXN.c
rxn04147_c0	(1) NADPH[c0] + (2) trans,trans-Farnesyl diphosphate[c0] => (2) Diphosphate[c0] + (1) H+[c0] + (1) NADP+[c0] + (1) Squalene[c0]	RXN-13162.c.araexp.NADP_NADPH|YEAST-SQUALENE-RXN.c	R_R06223_c	R06223_c
rxn04161_c0	(1) Chlorophyllide[c0] + (1) H+[c0] + (1) Phytyl diphosphate[c0] <=> (1) Chlorophyll a[c0] + (1) Diphosphate[c0]	RXN1F-66.c	R_R06284_c	R06284_c
rxn04165_c0	(1) H+[c0] + (1) NADPH[c0] + (1) Oxygen[c0] + (1) ent-Kaurene[c0] => (1) H2O[c0] + (1) Kaur-16-en-18-ol[c0] + (1) NADP+[c0]	1.14.13.78-RXN.c	R_R06291_c	R06291_c
rxn04166_c0	(1) H+[c0] + (1) Kaur-16-en-18-ol[c0] + (1) NADPH[c0] + (1) Oxygen[c0] => (2) H2O[c0] + (1) Kaur-16-en-18-al[c0] + (1) NADP+[c0]	RXN-5242.c	R_R06292_c	R06292_c
rxn04167_c0	(1) Kaur-16-en-18-al[c0] + (1) NADPH[c0] + (1) Oxygen[c0] => (1) H2O[c0] + (1) Kaur-16-en-18-oic acid[c0] + (1) NADP+[c0]	RXN-7580.c	R_R06293_c	R06293_c
rxn04168_c0	(1) H+[c0] + (1) Kaur-16-en-18-oic acid[c0] + (1) NADPH[c0] + (1) Oxygen[c0] => (1) H2O[c0] + (1) NADP+[c0] + (1) ent-7alpha-Hydroxykaur-16-en-19-oic acid[c0]	1.14.13.79-RXN.c	R_R06294_c	R06294_c
rxn04168_r0	(1) H+[r0] + (1) Kaur-16-en-18-oic acid[r0] + (1) NADPH[r0] + (1) Oxygen[r0] => (1) H2O[r0] + (1) NADP+[r0] + (1) ent-7alpha-Hydroxykaur-16-en-19-oic acid[r0]	1.14.13.79-RXN.c	R_R06294_c	R06294_c
rxn04169_c0	(1) H+[c0] + (1) NADPH[c0] + (1) Oxygen[c0] + (1) ent-7alpha-Hydroxykaur-16-en-19-oic acid[c0] => (1) Gibberellin A12 aldehyde[c0] + (2) H2O[c0] + (1) NADP+[c0]	RXN1F-160.c	R_R06295_c	R06295_c
rxn04169_r0	(1) H+[r0] + (1) NADPH[r0] + (1) Oxygen[r0] + (1) ent-7alpha-Hydroxykaur-16-en-19-oic acid[r0] => (1) Gibberellin A12 aldehyde[r0] + (2) H2O[r0] + (1) NADP+[r0]	RXN1F-160.c	R_R06295_c	R06295_c
rxn04171_c0	(1) Gibberellin A12 aldehyde[c0] + (1) NADPH[c0] + (1) Oxygen[c0] => (1) Gibberellin A12[c0] + (1) H2O[c0] + (1) NADP+[c0]	RXN1F-161.c	R_R06297_c	R06297_c
rxn04171_r0	(1) Gibberellin A12 aldehyde[r0] + (1) NADPH[r0] + (1) Oxygen[r0] => (1) Gibberellin A12[r0] + (1) H2O[r0] + (1) NADP+[r0]	RXN1F-161.c	R_R06297_c	R06297_c
rxn04208_c0	(1) 2-Oxoglutarate[c0] + (1) Gibberellin A24[c0] + (1) Oxygen[c0] => (1) CO2[c0] + (1) Gibberellin A36[c0] + (1) Succinate[c0]	RXN-6523.c
rxn04209_c0	(1) 2-Oxoglutarate[c0] + (1) Gibberellin A9[c0] + (1) Oxygen[c0] => (1) CO2[c0] + (1) Gibberellin A4[c0] + (1) Succinate[c0]	RXN1F-165.c	R_R06336_c	R06336_c
rxn04210_c0	(1) 2-Oxoglutarate[c0] + (1) Gibberellin A9[c0] + (1) Oxygen[c0] => (1) CO2[c0] + (1) Gibberellin A51[c0] + (1) Succinate[c0]	RXN-171.c	R_R06337_c	R06337_c
rxn04211_c0	(1) 2-Oxoglutarate[c0] + (1) Gibberellin A4[c0] + (1) Oxygen[c0] => (1) CO2[c0] + (1) Gibberellin A34[c0] + (1) Succinate[c0]	RXN-6550.c	R_R06338_c	R06338_c
rxn04284_c0	(1) (-)-alpha-Terpineol[c0] <=> (1) 1,8-Cineole[c0]	RXN-5102.c		R06422_c
rxn04327_c0	(1) (S)-2,3-Epoxysqualene[c0] => (1) Lupeol[c0]	RXN-111.c
rxn04330_c0	(1) (S)-2,3-Epoxysqualene[c0] => (1) beta-Amyrin[c0]	RXN-7570.c
rxn04332_c0	(1) (S)-2,3-Epoxysqualene[c0] => (1) alpha-Amyrin[c0]	RXN-8434.c
rxn04376_c0	(1) H2O[c0] + (1) Sphinganine 1-phosphate[c0] => (1) Orthophosphate[c0] + (1) Sphinganine[c0]			R06520_c
rxn04381_c0	(1) H+[c0] + (1) NADPH[c0] + (1) Oxygen[c0] + (1) Sphinganine[c0] => (1) H2O[c0] + (1) NADP+[c0] + (1) Phytosphingosine[c0]	RXN3O-1380.c
rxn04389_c0	(1) H+[c0] + (1) Pelargonidin[c0] + (1) UDP-glucose[c0] <=> (1) Pelargonidin 3-O-glucoside[c0] + (1) UDP[c0]	PELUDP-RXN.c.araexp.CPD-12575	R_R06534_c	R06534_c
rxn04390_c0	(1) Cyanidin[c0] + (1) H+[c0] + (1) UDP-glucose[c0] <=> (1) Chrysanthemin[c0] + (1) UDP[c0]	RXN1F-775.c.araexp.CPD-12575	R_R06535_c	R06535_c
rxn04392_c0	(1) Apigenin[c0] + (1) H+[c0] + (1) NADPH[c0] + (1) Oxygen[c0] => (1) H2O[c0] + (1) Luteolin[c0] + (1) NADP+[c0]	RXN-7651.c	R_R06537_c	R06537_c
rxn04411_c0	(1) Isoliquiritigenin[c0] => (1) Liquiritigenin[c0]	CHALCONE-ISOMERASE-RXN.c.araexp.CPD-3041_CPD-3061|RXN-3221.c	R_R06556_c	R06556_c
rxn04411_n0	(1) Isoliquiritigenin[n0] => (1) Liquiritigenin[n0]	CHALCONE-ISOMERASE-RXN.c.araexp.CPD-3041_CPD-3061|RXN-3221.c	R_R06556_c	R06556_c
rxn04411_r0	(1) Isoliquiritigenin[r0] => (1) Liquiritigenin[r0]	CHALCONE-ISOMERASE-RXN.c.araexp.CPD-3041_CPD-3061|RXN-3221.c	R_R06556_c	R06556_c
rxn04424_c0	(1) 5-Hydroxyconiferaldehyde[c0] + (1) H+[c0] + (1) NADPH[c0] <= (1) 5-Hydroxyconiferyl alcohol[c0] + (1) NADP+[c0]
rxn04426_c0	(1) Coniferyl aldehyde[c0] + (1) H+[c0] + (1) NADPH[c0] + (1) Oxygen[c0] <=> (1) 5-Hydroxyconiferaldehyde[c0] + (1) H2O[c0] + (1) NADP+[c0]	RXN-1142.c
rxn04431_c0	(1) 5-Hydroxyconiferyl alcohol[c0] + (1) S-Adenosyl-L-methionine[c0] <= (1) H+[c0] + (1) S-Adenosyl-L-homocysteine[c0] + (1) Sinapyl alcohol[c0]
rxn04463_c0	(1) Kaempferol[c0] + (1) UDP-glucose[c0] <=> (1) Kaempferol 3-O-glucoside[c0] + (1) UDP[c0]	RXN1F-461.c.araexp.CPD-12575	R_R06611_c	R06611_c
rxn04464_c0	(1) 5,10-Methylenetetrahydrofolate[c0] + (1) H+[c0] + (1) NADPH[c0] + (1) dUMP[c0] => (1) NADP+[c0] + (1) Tetrahydrofolate[c0] + (1) dTMP[c0]
rxn04625_c0	(1) H+[c0] + (1) Quercetin[c0] + (1) UDP-glucose[c0] <=> (1) Quercimeritrin[c0] + (1) UDP[c0]	RXN-8264.c.araexp.CPD-12575_CPD-520
rxn04630_c0	(1) Myricetin[c0] + (1) S-Adenosyl-L-methionine[c0] <=> (1) H+[c0] + (1) Laricitrin[c0] + (1) S-Adenosyl-L-homocysteine[c0]	RXN-8451.c
rxn04630_n0	(1) Myricetin[n0] + (1) S-Adenosyl-L-methionine[n0] <=> (1) H+[n0] + (1) Laricitrin[n0] + (1) S-Adenosyl-L-homocysteine[n0]	RXN-8451.c
rxn04675_c0	(1) 2-Oxoglutarate[c0] + (1) H+[c0] + (1) Isochorismate[c0] <= (1) (1R,6R)-6-Hydroxy-2-succinylcyclohexa-2,4-diene-1-carboxylate[c0] + (1) CO2[c0] + (1) Pyruvate[c0]			R06860_c
rxn04681_c0	(1) N-Methylethanolamine phosphate[c0] + (1) S-Adenosyl-L-methionine[c0] <=> (1) H+[c0] + (1) Phosphodimethylethanolamine[c0] + (1) S-Adenosyl-L-homocysteine[c0]	RXN-5642.c	R_R06868_c	R06868_c
rxn04682_c0	(1) Phosphodimethylethanolamine[c0] + (1) S-Adenosyl-L-methionine[c0] <= (1) Choline phosphate[c0] + (1) H+[c0] + (1) S-Adenosyl-L-homocysteine[c0]	RXN-5643.c	R_R06869_c	R06869_c
rxn04727_c0	(1) 1-Naphthaldehyde[c0] + (1) H2O[c0] + (1) NAD+[c0] <= (1) 1-Naphthoic acid[c0] + (2) H+[c0] + (1) NADH[c0]
rxn04759_c0	(1) Violaxanthin[c0] <= (1) 9-cis-Violaxanthin[c0]
rxn04761_c0	(1) 9'-cis-Neoxanthin[c0] + (1) Oxygen[c0] => (1) C25-Allenic-apo-aldehyde[c0] + (1) Xanthoxin[c0]	RXN-698.c		R06952_c
rxn04763_c0	(1) NAD+[c0] + (1) Xanthoxin[c0] <=> (1) Abscisic aldehyde[c0] + (1) H+[c0] + (1) NADH[c0]	1.1.1.288-RXN.c
rxn04766_c0	(1) Abscisic aldehyde[c0] + (1) H2O[c0] + (1) Oxygen[c0] => (1) Abscisate[c0] + (1) H+[c0] + (1) Hydrogen peroxide[c0]	1.2.3.14-RXN.c		R06957_c
rxn04771_c0	(1) delta-Carotene[c0] <=> (1) alpha-Carotene[c0]	RXN1F-148.c	R_R06962_c	R06962_c
rxn04772_c0	(1) Lycopene[c0] <=> (1) delta-Carotene[c0]	RXN1F-147.c	R_R06963_c	R06963_c
rxn04774_c0	(1) gamma-Carotene[c0] => (1) alpha-Carotene[c0]		R_R06965_c	R06965_c
rxn04783_c0	(1) 5'-Phosphoribosylglycinamide[c0] + (1) ATP[c0] + (1) Formate[c0] => (1) 5'-Phosphoribosyl-N-formylglycinamide[c0] + (1) ADP[c0] + (1) H+[c0] + (1) Orthophosphate[c0]	GARTRANSFORMYL2-RXN.c
rxn04791_c0	(1) Formaldehyde[c0] + (1) Glutathione[c0] <=> (1) S-(Hydroxymethyl)glutathione[c0]	RXN-2961.c
rxn04792_c0	(1) NAD+[c0] + (1) S-(Hydroxymethyl)glutathione[c0] <=> (1) H+[c0] + (1) NADH[c0] + (1) S-Formylglutathione[c0]	RXN-2962.c.araexp.NAD_NADH	R_R06983_c	R06983_c
rxn04938_c0	(1) NADP+[c0] + (1) S-(Hydroxymethyl)glutathione[c0] <=> (1) H+[c0] + (1) NADPH[c0] + (1) S-Formylglutathione[c0]	RXN-2962.c.araexp.NADP_NADPH
rxn04947_c0	(1) 3beta-Hydroxy-4beta-methyl-5alpha-cholest-7-ene-4alpha-carboxylate[c0] + (1) NADP+[c0] <=> (1) 4alpha-Methyl-5alpha-cholest-7-en-3-one[c0] + (1) CO2[c0] + (1) NADPH[c0]	1.1.1.170-RXN.c.araexp.NADP_NADPH
rxn04954_c0	(1) 5-Methyltetrahydrofolate[c0] + (1) NAD+[c0] <=> (1) 5,10-Methylenetetrahydrofolate[c0] + (1) H+[c0] + (1) NADH[c0]	1.5.1.20-RXN.c
rxn04965_c0	(1) 2-Oxoglutarate[c0] + (1) Gibberellin A44[c0] + (1) Oxygen[c0] <= (1) CO2[c0] + (1) Gibberellin A19[c0] + (1) H+[c0] + (1) Succinate[c0]			R07184_c
rxn04981_c0	(1) Abscisate[c0] + (1) H+[c0] + (1) NADPH[c0] + (1) Oxygen[c0] => (1) 8'-Hydroxyabscisate[c0] + (1) H2O[c0] + (1) NADP+[c0]	1.14.13.93-RXN.c
rxn05005_c0	(1) S-Adenosyl-L-methionine[c0] + (1) Uroporphyrinogen III[c0] <=> (1) H+[c0] + (1) Precorrin 1[c0] + (1) S-Adenosyl-L-homocysteine[c0]	UROPORIIIMETHYLTRANSA-RXN.c
rxn05006_c0	(1) Precorrin 1[c0] + (1) S-Adenosyl-L-methionine[c0] <=> (1) Precorrin 2[c0] + (1) S-Adenosyl-L-homocysteine[c0]	RXN-8675.c
rxn05022_c0	(1) UDP-glucose[c0] + (1) cis-Zeatin[c0] <=> (1) O-beta-D-Glucopyranosyl-cis-zeatin[c0] + (1) UDP[c0]	RXN-4735.c.araexp.CPD-12575
rxn05024_c0	(1) 2-Succinylbenzoyl-CoA[c0] + (1) H+[c0] <=> (1) 1,4-Dihydroxy-2-naphthoyl-CoA[c0] + (1) H2O[c0]	NAPHTHOATE-SYN-RXN.c	R_R07263_c	R07263_c
rxn05024_d0	(1) 2-Succinylbenzoyl-CoA[d0] + (1) H+[d0] => (1) 1,4-Dihydroxy-2-naphthoyl-CoA[d0] + (1) H2O[d0]	NAPHTHOATE-SYN-RXN.c	R_R07263_c	R07263_c
rxn05034_c0	(1) 4-Hydroxybenzoate[c0] + (1) all-trans-Nonaprenyl diphosphate[c0] => (1) 3-Nonaprenyl-4-hydroxybenzoate[c0] + (1) Diphosphate[c0] + (1) H+[c0]	2.5.1.39-RXN.c
rxn05039_c0	(1) 5-Amino-6-(5'-phospho-D-ribitylamino)uracil[c0] + (1) H2O[c0] => (1) 5-Amino-6-(1-D-ribitylamino)uracil[c0] + (1) Orthophosphate[c0]	RIBOPHOSPHAT-RXN.c
rxn05040_c0	(1) D-Ribulose 5-phosphate[c0] => (1) Formate[c0] + (1) H+[c0] + (1) L-3,4-Dihydroxybutan-2-one 4-phosphate[c0]	DIOHBUTANONEPSYN-RXN.c	R_R07281_c	R07281_c
rxn05064_c0	(1) Carbamate[c0] + (2) H+[c0] <=> (1) CO2[c0] + (1) NH3[c0]	RXN0-5222.c
rxn05092_c0	(1) 1,2-Dihydroxy-5-(methylthio)pent-1-en-3-one[c0] + (1) Oxygen[c0] => (1) 4-Methylthio-2-oxobutanoic acid[c0] + (1) Formate[c0] + (2) H+[c0]	R147-RXN.c
rxn05104_c0	(1) S-Methyl-5-thio-D-ribulose 1-phosphate[c0] => (1) 2,3-Diketo-5-methylthiopentyl-1-phosphate[c0] + (1) H2O[c0]	R145-RXN.c
rxn05105_c0	(1) 2,3-Diketo-5-methylthiopentyl-1-phosphate[c0] <=> (1) 2-Hydroxy-3-keto-5-methylthiopentenyl-1-phosphate[c0]	R82-RXN.c
rxn05106_c0	(1) 2-Hydroxy-3-keto-5-methylthiopentenyl-1-phosphate[c0] + (1) H2O[c0] <=> (1) 1,2-Dihydroxy-5-(methylthio)pent-1-en-3-one[c0] + (1) Orthophosphate[c0]	R83-RXN.c
rxn05118_c0	(1) 4-Aminobutyraldehyde[c0] <=> (1) 1-Pyrroline[c0] + (1) H2O[c0]	RXN-6423.c
rxn05120_c0	(1) H2O[c0] + (1) Heme[c0] + (1) trans,trans-Farnesyl diphosphate[c0] => (1) Diphosphate[c0] + (1) H+[c0] + (1) Heme O[c0]	HEMEOSYN-RXN.c
rxn05136_c0	(1) Quinate[c0] + (1) p-Coumaroyl-CoA[c0] => (1) CoA[c0] + (1) p-Coumaroyl quinic acid[c0]	RXN-2601.c
rxn05143_c0	(1) H2O[c0] + (1) NADP+[c0] + (1) Sinapoyl aldehyde[c0] <=> (2) H+[c0] + (1) NADPH[c0] + (1) Sinapate[c0]	RXN-8014.c	R_R07442_c	R07442_c
rxn05206_e0	(1) Potassium cation[e0] <=> (1) Potassium cation[c0]	TRANS-RXN-185.ce|TRANS-RXN-186.ce|TRANS-RXN-187.ce|TRANS-RXN-190.ce
rxn05238_e0	(1) Sulfate[e0] <=> (1) Sulfate[c0]		R_Ex12	Ex12
rxn05241_e0	(1) L-Isoleucine[e0] + (1) Sodium cation[e0] <= (1) L-Isoleucine[c0] + (1) Sodium cation[c0]
rxn05319_e0	(1) H2O[e0] <=> (1) H2O[c0]		R_Ex2	Ex2
rxn05324_c0	(1) Dodecanoyl-[acyl-carrier protein][c0] + (1) NAD+[c0] <= (1) H+[c0] + (1) NADH[c0] + (1) trans-Dodec-2-enoyl-[acp][c0]	RXN-9661.c	R_R04724_c	R04724_c
rxn05325_c0	(1) NAD+[c0] + (1) Octanoyl-[acp][c0] <= (1) H+[c0] + (1) NADH[c0] + (1) trans-Oct-2-enoyl-[acp][c0]	RXN-9659.c	R_R04958_c	R04958_c
rxn05326_c0	(1) Hexanoyl-[acp][c0] + (1) NAD+[c0] <= (1) H+[c0] + (1) NADH[c0] + (1) trans-Hex-2-enoyl-[acp][c0]	RXN-9658.c	R_R04955_c	R04955_c
rxn05330_c0	(1) (R)-3-Hydroxyhexanoyl-[acp][c0] <=> (1) H2O[c0] + (1) trans-Hex-2-enoyl-[acp][c0]	RXN-9520.c	R_R04954_c	R04954_c
rxn05331_c0	(1) (R)-3-Hydroxydodecanoyl-[acp][c0] <=> (1) H2O[c0] + (1) trans-Dodec-2-enoyl-[acp][c0]	RXN-9533.c	R_R04965_c	R04965_c
rxn05335_c0	(1) (3R)-3-Hydroxytetradecanoyl-[acyl-carrier protein][c0] <=> (1) H2O[c0] + (1) trans-Tetradec-2-enoyl-[acp][c0]	RXN-9537.c	R_R04568_c	R04568_c
rxn05337_c0	(1) (R)-3-Hydroxyhexanoyl-[acp][c0] + (1) NADP+[c0] <=> (1) 3-Oxohexanoyl-[acp][c0] + (1) H+[c0] + (1) NADPH[c0]	RXN-9518.c	R_R04953_c	R04953_c
rxn05338_c0	(1) (3R)-3-Hydroxydecanoyl-[acyl-carrier protein][c0] + (1) NADP+[c0] <= (1) 3-Oxodecanoyl-[acp][c0] + (1) H+[c0] + (1) NADPH[c0]	RXN-9528.c	R_R04534_c	R04534_c
rxn05340_c0	(1) (R)-3-Hydroxydodecanoyl-[acp][c0] + (1) NADP+[c0] <=> (1) 3-Oxododecanoyl-[acp][c0] + (1) H+[c0] + (1) NADPH[c0]	RXN-9532.c	R_R04964_c	R04964_c
rxn05342_c0	(1) (3R)-3-Hydroxytetradecanoyl-[acyl-carrier protein][c0] + (1) NADP+[c0] <=> (1) 3-Oxotetradecanoyl-[acp][c0] + (1) H+[c0] + (1) NADPH[c0]	RXN-9536.c	R_R04566_c	R04566_c
rxn05343_c0	(1) Malonyl-[acyl-carrier protein][c0] + (1) Octanoyl-[acp][c0] => (1) 3-Oxodecanoyl-[acp][c0] + (1) Acyl-carrier protein[c0] + (1) CO2[c0]	RXN-9527.c	R_R04960_c	R04960_c
rxn05345_c0	(1) Dodecanoyl-[acyl-carrier protein][c0] + (1) Malonyl-[acyl-carrier protein][c0] => (1) 3-Oxotetradecanoyl-[acp][c0] + (1) Acyl-carrier protein[c0] + (1) CO2[c0]	RXN-9535.c	R_R04726_c	R04726_c
rxn05346_c0	(1) Butyryl-[acp][c0] + (1) Malonyl-[acyl-carrier protein][c0] => (1) 3-Oxohexanoyl-[acp][c0] + (1) Acyl-carrier protein[c0] + (1) CO2[c0]	RXN-9516.c	R_R04952_c	R04952_c
rxn05347_c0	(1) Acetyl-[acyl-carrier protein][c0] + (1) Malonyl-[acyl-carrier protein][c0] => (1) Acetoacetyl-[acp][c0] + (1) Acyl-carrier protein[c0] + (1) CO2[c0]	3-OXOACYL-ACP-SYNTH-BASE-RXN.c	R_R04355_c	R04355_c
rxn05348_c0	(1) Decanoyl-[acp][c0] + (1) Malonyl-[acyl-carrier protein][c0] => (1) 3-Oxododecanoyl-[acp][c0] + (1) Acyl-carrier protein[c0] + (1) CO2[c0]	RXN-9531.c	R_R04963_c	R04963_c
rxn05349_c0	(1) Acetyl-CoA[c0] + (1) Acyl-carrier protein[c0] => (1) Acetyl-[acyl-carrier protein][c0] + (1) CoA[c0]	ACP-S-ACETYLTRANSFER-RXN.c	R_R01624_c	R01624_c
rxn05350_c0	(1) Hexanoyl-[acp][c0] + (1) Malonyl-[acyl-carrier protein][c0] => (1) 3-Oxooctanoyl-[acp][c0] + (1) Acyl-carrier protein[c0] + (1) CO2[c0]	RXN-9523.c|RXN-9649.c	R_R04957_c	R04957_c
rxn05465_c0	(1) Acyl-carrier protein[c0] + (1) H+[c0] + (1) Malonyl-CoA[c0] <=> (1) CoA[c0] + (1) Malonyl-[acyl-carrier protein][c0]	MALONYL-COA-ACP-TRANSACYL-RXN.c	R_R01626_c	R01626_c
rxn05467_e0	(1) CO2[e0] <=> (1) CO2[c0]		R_Ex1	Ex1
rxn05468_e0	(1) Oxygen[e0] <=> (1) Oxygen[c0]		R_Ex3	Ex3
rxn05616_e0	(1) Magnesium cation[e0] <=> (1) Magnesium cation[c0]
rxn05686_e0	(1) H+[e0] + (1) Tyramine[e0] <= (1) H+[c0] + (1) Tyramine[c0]
rxn05736_c0	(1) ATP[c0] + (1) CoA[c0] + (1) Tetradecanoic acid[c0] => (1) AMP[c0] + (1) Diphosphate[c0] + (1) H+[c0] + (1) Tetradecanoyl-CoA[c0]	RXN-7904.c.araexp.CPD-7836_TETRADECANOYL-COA
rxn05736_r0	(1) ATP[r0] + (1) CoA[r0] + (1) Tetradecanoic acid[r0] => (1) AMP[r0] + (1) Diphosphate[r0] + (1) H+[r0] + (1) Tetradecanoyl-CoA[r0]	RXN-7904.c.araexp.CPD-7836_TETRADECANOYL-COA
rxn05957_c0	(1) Hydrogen sulfide[c0] + (1) O-Succinyl-L-homoserine[c0] => (1) L-Homocysteine[c0] + (1) Succinate[c0]		R_R01288_c
rxn06009_c0	(1) Aromatic aldehyde[c0] + (1) H2O[c0] + (1) Oxygen[c0] => (1) Benzoate[c0] + (1) H+[c0] + (1) Hydrogen peroxide[c0]	RXN-8088.c
rxn06074_c0	(1) Geranyl diphosphate[c0] => (1) Diphosphate[c0] + (1) H+[c0] + (1) Pinene[c0]	4.2.3.14-RXN.c
rxn06135_c0	(3) H+[c0] + (1) Malonyl-CoA[c0] + (2) NADH[c0] + (1) Stearoyl-CoA[c0] => (1) CO2[c0] + (1) CoA[c0] + (1) Eicosanoyl-CoA[c0] + (1) H2O[c0] + (2) NAD+[c0]	ICOSANOYL-COA-SYNTHASE-RXN.c.araexp.CPD-9965_NAD_NADH
rxn06135_x0	(3) H+[x0] + (1) Malonyl-CoA[x0] + (2) NADH[x0] + (1) Stearoyl-CoA[x0] <=> (1) CO2[x0] + (1) CoA[x0] + (1) Eicosanoyl-CoA[x0] + (1) H2O[x0] + (2) NAD+[x0]	ICOSANOYL-COA-SYNTHASE-RXN.c.araexp.CPD-9965_NAD_NADH
rxn06136_c0	(3) H+[c0] + (1) Malonyl-CoA[c0] + (2) NADPH[c0] + (1) Stearoyl-CoA[c0] <=> (1) CO2[c0] + (1) CoA[c0] + (1) Eicosanoyl-CoA[c0] + (1) H2O[c0] + (2) NADP+[c0]	ICOSANOYL-COA-SYNTHASE-RXN.c.araexp.CPD-9965_NADP_NADPH
rxn06136_x0	(3) H+[x0] + (1) Malonyl-CoA[x0] + (2) NADPH[x0] + (1) Stearoyl-CoA[x0] => (1) CO2[x0] + (1) CoA[x0] + (1) Eicosanoyl-CoA[x0] + (1) H2O[x0] + (2) NADP+[x0]	ICOSANOYL-COA-SYNTHASE-RXN.c.araexp.CPD-9965_NADP_NADPH
rxn06537_c0	(1) Histone-L-lysine[c0] + (1) S-Adenosyl-L-methionine[c0] => (1) H+[c0] + (1) Histone N6-methyl-L-lysine[c0] + (1) S-Adenosyl-L-homocysteine[c0]	HISTONE-LYSINE-N-METHYLTRANSFERASE-RXN.c
rxn06633_c0	(1) Peptidylproline (omega=180)[c0] <=> (1) Peptidylproline (omega=0)[c0]	PEPTIDYLPROLYL-ISOMERASE-RXN.c		R04273_c
rxn06723_c0	(1) Acyl-carrier protein[c0] + (1) H+[c0] + (1) UDP-2,3-bis(3-hydroxytetradecanoyl)glucosamine[c0] <= (1) (3R)-3-Hydroxytetradecanoyl-[acyl-carrier protein][c0] + (1) UDP-3-O-(3-hydroxytetradecanoyl)-D-glucosamine[c0]	UDPHYDROXYMYRGLUCOSAMNACETYLTRANS-RXN.c
[truncated: 2,115 more rows]

## Sheet: Full Maize Model
ModelSEED ID	Reaction Defintion	CornCyc	MaizeCyc	C4GEM	iRS1563
[truncated: 6,458 more rows]

## Sheet: Evidenced Maize Model
ModelSEED ID	Reaction Defintion	CornCyc	MaizeCyc	C4GEM	iRS1563
[truncated: 2,629 more rows]

[truncated: 3 more sheets: Evidenced Maize Leaf Model, Evidenced Maize Endosperm Model, Evidenced Maize Embryo Model]
